# Supplementary material for: Protein Phosphatase 2B Dual Function Facilitates Synaptic Integrity and Motor Learning
Source: J Neurosci. 2021 Jun 30;41(26):5579–94. doi: 10.1523/JNEUROSCI.1741-20.2021 (PMC8244972; doi:10.1523/JNEUROSCI.1741-20.2021)
Supplement: Figure 3-2 — BN-PAGE.xlsx: IP-BN-PAGE-MS result with PP2B antibody from WT Download Figure 3-2, XLSX file. [file ns-JN-RM-1741-20-s06.xlsx]

## Sheet: BN-PAGE
File Name	Protein Name	Protein Description	Peptide Sequence	Peptide Modified Sequence	Best Retention Time	Total Area	Replicate
101_130_BN001.wiff	Library Peptides	LPPR4	ESMVTFSNTLPR	ESM[+16]VTFSNTLPR	25.03	522	1
101_130_BN002.wiff	Library Peptides	LPPR4	ESMVTFSNTLPR	ESM[+16]VTFSNTLPR	24.48	1144	2
101_130_BN003.wiff	Library Peptides	LPPR4	ESMVTFSNTLPR	ESM[+16]VTFSNTLPR	24.75	1836	3
101_130_BN004.wiff	Library Peptides	LPPR4	ESMVTFSNTLPR	ESM[+16]VTFSNTLPR	24.59	2053	4
101_130_BN005.wiff	Library Peptides	LPPR4	ESMVTFSNTLPR	ESM[+16]VTFSNTLPR	23.73	426	5
101_130_BN006.wiff	Library Peptides	LPPR4	ESMVTFSNTLPR	ESM[+16]VTFSNTLPR	24.09	2545	6
101_130_BN007.wiff	Library Peptides	LPPR4	ESMVTFSNTLPR	ESM[+16]VTFSNTLPR	24.04	4102	7
101_130_BN008.wiff	Library Peptides	LPPR4	ESMVTFSNTLPR	ESM[+16]VTFSNTLPR	24.13	1992	8
101_130_BN009.wiff	Library Peptides	LPPR4	ESMVTFSNTLPR	ESM[+16]VTFSNTLPR	24.06	1051	9
101_130_BN010.wiff	Library Peptides	LPPR4	ESMVTFSNTLPR	ESM[+16]VTFSNTLPR	24.16	1956	10
101_130_BN011.wiff	Library Peptides	LPPR4	ESMVTFSNTLPR	ESM[+16]VTFSNTLPR	24.06	791	11
101_130_BN012.wiff	Library Peptides	LPPR4	ESMVTFSNTLPR	ESM[+16]VTFSNTLPR	24.11	382	12
101_130_BN013.wiff	Library Peptides	LPPR4	ESMVTFSNTLPR	ESM[+16]VTFSNTLPR	24.1	353	13
101_130_BN014.wiff	Library Peptides	LPPR4	ESMVTFSNTLPR	ESM[+16]VTFSNTLPR	24.39	818	14
101_130_BN015.wiff	Library Peptides	LPPR4	ESMVTFSNTLPR	ESM[+16]VTFSNTLPR	24.21	823	15
101_130_BN016.wiff	Library Peptides	LPPR4	ESMVTFSNTLPR	ESM[+16]VTFSNTLPR	24.52	461	16
101_130_BN017.wiff	Library Peptides	LPPR4	ESMVTFSNTLPR	ESM[+16]VTFSNTLPR	24.34	1224	17
101_130_BN018.wiff	Library Peptides	LPPR4	ESMVTFSNTLPR	ESM[+16]VTFSNTLPR	24.33	1184	18
101_130_BN019.wiff	Library Peptides	LPPR4	ESMVTFSNTLPR	ESM[+16]VTFSNTLPR	24.69	3133	19
101_130_BN020.wiff	Library Peptides	LPPR4	ESMVTFSNTLPR	ESM[+16]VTFSNTLPR	24.57	11333	20
101_130_BN021.wiff	Library Peptides	LPPR4	ESMVTFSNTLPR	ESM[+16]VTFSNTLPR	24.53	20655	21
101_130_BN022.wiff	Library Peptides	LPPR4	ESMVTFSNTLPR	ESM[+16]VTFSNTLPR	24.58	35572	22
101_130_BN023.wiff	Library Peptides	LPPR4	ESMVTFSNTLPR	ESM[+16]VTFSNTLPR	24.59	19564	23
101_130_BN024.wiff	Library Peptides	LPPR4	ESMVTFSNTLPR	ESM[+16]VTFSNTLPR	24.65	22016	24
101_130_BN025.wiff	Library Peptides	LPPR4	ESMVTFSNTLPR	ESM[+16]VTFSNTLPR	24.65	14437	25
101_130_BN026.wiff	Library Peptides	LPPR4	ESMVTFSNTLPR	ESM[+16]VTFSNTLPR	25.76	29668	26
101_130_BN027.wiff	Library Peptides	LPPR4	ESMVTFSNTLPR	ESM[+16]VTFSNTLPR	25.46	36718	27
101_130_BN028.wiff	Library Peptides	LPPR4	ESMVTFSNTLPR	ESM[+16]VTFSNTLPR	24.69	17977	28
101_130_BN029.wiff	Library Peptides	LPPR4	ESMVTFSNTLPR	ESM[+16]VTFSNTLPR	24.54	5855	29
101_130_BN030.wiff	Library Peptides	LPPR4	ESMVTFSNTLPR	ESM[+16]VTFSNTLPR	24.34	5015	30
101_130_BN001.wiff	Library Peptides	SIK3	AAAAASGAGGVAVAGAGGAGPAGR	A[+42]AAAASGAGGVAVAGAGGAGPAGR	23.04	763	1
101_130_BN002.wiff	Library Peptides	SIK3	AAAAASGAGGVAVAGAGGAGPAGR	A[+42]AAAASGAGGVAVAGAGGAGPAGR	23.52	917	2
101_130_BN003.wiff	Library Peptides	SIK3	AAAAASGAGGVAVAGAGGAGPAGR	A[+42]AAAASGAGGVAVAGAGGAGPAGR	23.18	590	3
101_130_BN004.wiff	Library Peptides	SIK3	AAAAASGAGGVAVAGAGGAGPAGR	A[+42]AAAASGAGGVAVAGAGGAGPAGR	23.34	1617	4
101_130_BN005.wiff	Library Peptides	SIK3	AAAAASGAGGVAVAGAGGAGPAGR	A[+42]AAAASGAGGVAVAGAGGAGPAGR	23.26	747	5
101_130_BN006.wiff	Library Peptides	SIK3	AAAAASGAGGVAVAGAGGAGPAGR	A[+42]AAAASGAGGVAVAGAGGAGPAGR	23.22	1037	6
101_130_BN007.wiff	Library Peptides	SIK3	AAAAASGAGGVAVAGAGGAGPAGR	A[+42]AAAASGAGGVAVAGAGGAGPAGR	22.8	730	7
101_130_BN008.wiff	Library Peptides	SIK3	AAAAASGAGGVAVAGAGGAGPAGR	A[+42]AAAASGAGGVAVAGAGGAGPAGR	23.25	1684	8
101_130_BN009.wiff	Library Peptides	SIK3	AAAAASGAGGVAVAGAGGAGPAGR	A[+42]AAAASGAGGVAVAGAGGAGPAGR	22.94	2527	9
101_130_BN010.wiff	Library Peptides	SIK3	AAAAASGAGGVAVAGAGGAGPAGR	A[+42]AAAASGAGGVAVAGAGGAGPAGR	22.94	8077	10
101_130_BN011.wiff	Library Peptides	SIK3	AAAAASGAGGVAVAGAGGAGPAGR	A[+42]AAAASGAGGVAVAGAGGAGPAGR	22.98	13744	11
101_130_BN012.wiff	Library Peptides	SIK3	AAAAASGAGGVAVAGAGGAGPAGR	A[+42]AAAASGAGGVAVAGAGGAGPAGR	22.9	14020	12
101_130_BN013.wiff	Library Peptides	SIK3	AAAAASGAGGVAVAGAGGAGPAGR	A[+42]AAAASGAGGVAVAGAGGAGPAGR	22.93	26557	13
101_130_BN014.wiff	Library Peptides	SIK3	AAAAASGAGGVAVAGAGGAGPAGR	A[+42]AAAASGAGGVAVAGAGGAGPAGR	22.86	43095	14
101_130_BN015.wiff	Library Peptides	SIK3	AAAAASGAGGVAVAGAGGAGPAGR	A[+42]AAAASGAGGVAVAGAGGAGPAGR	22.93	57464	15
101_130_BN016.wiff	Library Peptides	SIK3	AAAAASGAGGVAVAGAGGAGPAGR	A[+42]AAAASGAGGVAVAGAGGAGPAGR	23.02	73416	16
101_130_BN017.wiff	Library Peptides	SIK3	AAAAASGAGGVAVAGAGGAGPAGR	A[+42]AAAASGAGGVAVAGAGGAGPAGR	23.11	118119	17
101_130_BN018.wiff	Library Peptides	SIK3	AAAAASGAGGVAVAGAGGAGPAGR	A[+42]AAAASGAGGVAVAGAGGAGPAGR	23.12	141287	18
101_130_BN019.wiff	Library Peptides	SIK3	AAAAASGAGGVAVAGAGGAGPAGR	A[+42]AAAASGAGGVAVAGAGGAGPAGR	23.16	99488	19
101_130_BN020.wiff	Library Peptides	SIK3	AAAAASGAGGVAVAGAGGAGPAGR	A[+42]AAAASGAGGVAVAGAGGAGPAGR	23.06	113952	20
101_130_BN021.wiff	Library Peptides	SIK3	AAAAASGAGGVAVAGAGGAGPAGR	A[+42]AAAASGAGGVAVAGAGGAGPAGR	23.11	107607	21
101_130_BN022.wiff	Library Peptides	SIK3	AAAAASGAGGVAVAGAGGAGPAGR	A[+42]AAAASGAGGVAVAGAGGAGPAGR	23.08	63521	22
101_130_BN023.wiff	Library Peptides	SIK3	AAAAASGAGGVAVAGAGGAGPAGR	A[+42]AAAASGAGGVAVAGAGGAGPAGR	23.08	52816	23
101_130_BN024.wiff	Library Peptides	SIK3	AAAAASGAGGVAVAGAGGAGPAGR	A[+42]AAAASGAGGVAVAGAGGAGPAGR	23.08	57329	24
101_130_BN025.wiff	Library Peptides	SIK3	AAAAASGAGGVAVAGAGGAGPAGR	A[+42]AAAASGAGGVAVAGAGGAGPAGR	23.05	55760	25
101_130_BN026.wiff	Library Peptides	SIK3	AAAAASGAGGVAVAGAGGAGPAGR	A[+42]AAAASGAGGVAVAGAGGAGPAGR	23.15	51648	26
101_130_BN027.wiff	Library Peptides	SIK3	AAAAASGAGGVAVAGAGGAGPAGR	A[+42]AAAASGAGGVAVAGAGGAGPAGR	23.1	32546	27
101_130_BN028.wiff	Library Peptides	SIK3	AAAAASGAGGVAVAGAGGAGPAGR	A[+42]AAAASGAGGVAVAGAGGAGPAGR	23.09	35024	28
101_130_BN029.wiff	Library Peptides	SIK3	AAAAASGAGGVAVAGAGGAGPAGR	A[+42]AAAASGAGGVAVAGAGGAGPAGR	22.99	14074	29
101_130_BN030.wiff	Library Peptides	SIK3	AAAAASGAGGVAVAGAGGAGPAGR	A[+42]AAAASGAGGVAVAGAGGAGPAGR	22.89	16585	30
101_130_BN001.wiff	Library Peptides	Grid2	AASGFAFGSVPEHR	AASGFAFGSVPEHR	23.86	228	1
101_130_BN002.wiff	Library Peptides	Grid2	AASGFAFGSVPEHR	AASGFAFGSVPEHR	23.84	691	2
101_130_BN003.wiff	Library Peptides	Grid2	AASGFAFGSVPEHR	AASGFAFGSVPEHR	23.85	265	3
101_130_BN004.wiff	Library Peptides	Grid2	AASGFAFGSVPEHR	AASGFAFGSVPEHR	24.11	343	4
101_130_BN005.wiff	Library Peptides	Grid2	AASGFAFGSVPEHR	AASGFAFGSVPEHR	24.01	771	5
101_130_BN006.wiff	Library Peptides	Grid2	AASGFAFGSVPEHR	AASGFAFGSVPEHR	24.03	547	6
101_130_BN007.wiff	Library Peptides	Grid2	AASGFAFGSVPEHR	AASGFAFGSVPEHR	24.02	1119	7
101_130_BN008.wiff	Library Peptides	Grid2	AASGFAFGSVPEHR	AASGFAFGSVPEHR	24.01	3628	8
101_130_BN009.wiff	Library Peptides	Grid2	AASGFAFGSVPEHR	AASGFAFGSVPEHR	23.91	3267	9
101_130_BN010.wiff	Library Peptides	Grid2	AASGFAFGSVPEHR	AASGFAFGSVPEHR	23.96	3372	10
101_130_BN011.wiff	Library Peptides	Grid2	AASGFAFGSVPEHR	AASGFAFGSVPEHR	23.87	908	11
101_130_BN012.wiff	Library Peptides	Grid2	AASGFAFGSVPEHR	AASGFAFGSVPEHR	23.87	679	12
101_130_BN013.wiff	Library Peptides	Grid2	AASGFAFGSVPEHR	AASGFAFGSVPEHR	23.72	663	13
101_130_BN014.wiff	Library Peptides	Grid2	AASGFAFGSVPEHR	AASGFAFGSVPEHR	24.06	1108	14
101_130_BN015.wiff	Library Peptides	Grid2	AASGFAFGSVPEHR	AASGFAFGSVPEHR	24.11	631	15
101_130_BN016.wiff	Library Peptides	Grid2	AASGFAFGSVPEHR	AASGFAFGSVPEHR	23.85	1047	16
101_130_BN017.wiff	Library Peptides	Grid2	AASGFAFGSVPEHR	AASGFAFGSVPEHR	23.97	613	17
101_130_BN018.wiff	Library Peptides	Grid2	AASGFAFGSVPEHR	AASGFAFGSVPEHR	24.22	1312	18
101_130_BN019.wiff	Library Peptides	Grid2	AASGFAFGSVPEHR	AASGFAFGSVPEHR	24.08	1342	19
101_130_BN020.wiff	Library Peptides	Grid2	AASGFAFGSVPEHR	AASGFAFGSVPEHR	23.99	6796	20
101_130_BN021.wiff	Library Peptides	Grid2	AASGFAFGSVPEHR	AASGFAFGSVPEHR	23.88	15606	21
101_130_BN022.wiff	Library Peptides	Grid2	AASGFAFGSVPEHR	AASGFAFGSVPEHR	23.87	6998	22
101_130_BN023.wiff	Library Peptides	Grid2	AASGFAFGSVPEHR	AASGFAFGSVPEHR	24.06	6109	23
101_130_BN024.wiff	Library Peptides	Grid2	AASGFAFGSVPEHR	AASGFAFGSVPEHR	24.19	10454	24
101_130_BN025.wiff	Library Peptides	Grid2	AASGFAFGSVPEHR	AASGFAFGSVPEHR	24.78	4517	25
101_130_BN026.wiff	Library Peptides	Grid2	AASGFAFGSVPEHR	AASGFAFGSVPEHR	24.73	915	26
101_130_BN027.wiff	Library Peptides	Grid2	AASGFAFGSVPEHR	AASGFAFGSVPEHR	24.41	1081	27
101_130_BN028.wiff	Library Peptides	Grid2	AASGFAFGSVPEHR	AASGFAFGSVPEHR	24.02	32420	28
101_130_BN029.wiff	Library Peptides	Grid2	AASGFAFGSVPEHR	AASGFAFGSVPEHR	23.85	48261	29
101_130_BN030.wiff	Library Peptides	Grid2	AASGFAFGSVPEHR	AASGFAFGSVPEHR	23.63	66817	30
101_130_BN001.wiff	Library Peptides	Calmodulin	ADQLTEEQIAEFK	A[+42]DQLTEEQIAEFK	32.07	140439	1
101_130_BN002.wiff	Library Peptides	Calmodulin	ADQLTEEQIAEFK	A[+42]DQLTEEQIAEFK	32.12	159667	2
101_130_BN003.wiff	Library Peptides	Calmodulin	ADQLTEEQIAEFK	A[+42]DQLTEEQIAEFK	32.12	140274	3
101_130_BN004.wiff	Library Peptides	Calmodulin	ADQLTEEQIAEFK	A[+42]DQLTEEQIAEFK	32.02	185478	4
101_130_BN005.wiff	Library Peptides	Calmodulin	ADQLTEEQIAEFK	A[+42]DQLTEEQIAEFK	32.06	154572	5
101_130_BN006.wiff	Library Peptides	Calmodulin	ADQLTEEQIAEFK	A[+42]DQLTEEQIAEFK	32.04	188500	6
101_130_BN007.wiff	Library Peptides	Calmodulin	ADQLTEEQIAEFK	A[+42]DQLTEEQIAEFK	31.92	704369	7
101_130_BN008.wiff	Library Peptides	Calmodulin	ADQLTEEQIAEFK	A[+42]DQLTEEQIAEFK	31.95	2818760	8
101_130_BN009.wiff	Library Peptides	Calmodulin	ADQLTEEQIAEFK	A[+42]DQLTEEQIAEFK	31.86	5230003	9
101_130_BN010.wiff	Library Peptides	Calmodulin	ADQLTEEQIAEFK	A[+42]DQLTEEQIAEFK	31.96	3469428	10
101_130_BN011.wiff	Library Peptides	Calmodulin	ADQLTEEQIAEFK	A[+42]DQLTEEQIAEFK	31.98	962134	11
101_130_BN012.wiff	Library Peptides	Calmodulin	ADQLTEEQIAEFK	A[+42]DQLTEEQIAEFK	31.9	371070	12
101_130_BN013.wiff	Library Peptides	Calmodulin	ADQLTEEQIAEFK	A[+42]DQLTEEQIAEFK	31.91	342842	13
101_130_BN014.wiff	Library Peptides	Calmodulin	ADQLTEEQIAEFK	A[+42]DQLTEEQIAEFK	31.84	408152	14
101_130_BN015.wiff	Library Peptides	Calmodulin	ADQLTEEQIAEFK	A[+42]DQLTEEQIAEFK	31.97	339480	15
101_130_BN016.wiff	Library Peptides	Calmodulin	ADQLTEEQIAEFK	A[+42]DQLTEEQIAEFK	31.97	325743	16
101_130_BN017.wiff	Library Peptides	Calmodulin	ADQLTEEQIAEFK	A[+42]DQLTEEQIAEFK	32.1	371130	17
101_130_BN018.wiff	Library Peptides	Calmodulin	ADQLTEEQIAEFK	A[+42]DQLTEEQIAEFK	32.17	370895	18
101_130_BN019.wiff	Library Peptides	Calmodulin	ADQLTEEQIAEFK	A[+42]DQLTEEQIAEFK	32.21	214018	19
101_130_BN020.wiff	Library Peptides	Calmodulin	ADQLTEEQIAEFK	A[+42]DQLTEEQIAEFK	32.08	500774	20
101_130_BN021.wiff	Library Peptides	Calmodulin	ADQLTEEQIAEFK	A[+42]DQLTEEQIAEFK	32.07	1067657	21
101_130_BN022.wiff	Library Peptides	Calmodulin	ADQLTEEQIAEFK	A[+42]DQLTEEQIAEFK	32.05	637731	22
101_130_BN023.wiff	Library Peptides	Calmodulin	ADQLTEEQIAEFK	A[+42]DQLTEEQIAEFK	32.08	604756	23
101_130_BN024.wiff	Library Peptides	Calmodulin	ADQLTEEQIAEFK	A[+42]DQLTEEQIAEFK	32.17	574682	24
101_130_BN025.wiff	Library Peptides	Calmodulin	ADQLTEEQIAEFK	A[+42]DQLTEEQIAEFK	32.12	404356	25
101_130_BN026.wiff	Library Peptides	Calmodulin	ADQLTEEQIAEFK	A[+42]DQLTEEQIAEFK	32.42	500403	26
101_130_BN027.wiff	Library Peptides	Calmodulin	ADQLTEEQIAEFK	A[+42]DQLTEEQIAEFK	32.3	222564	27
101_130_BN028.wiff	Library Peptides	Calmodulin	ADQLTEEQIAEFK	A[+42]DQLTEEQIAEFK	32.14	160008	28
101_130_BN029.wiff	Library Peptides	Calmodulin	ADQLTEEQIAEFK	A[+42]DQLTEEQIAEFK	32.06	55887	29
101_130_BN030.wiff	Library Peptides	Calmodulin	ADQLTEEQIAEFK	A[+42]DQLTEEQIAEFK	31.76	14759	30
101_130_BN001.wiff	Library Peptides	Nptxr	AELLLLQSTAEQLR	AELLLLQSTAEQLR	36.4	1394	1
101_130_BN002.wiff	Library Peptides	Nptxr	AELLLLQSTAEQLR	AELLLLQSTAEQLR	36.78	3382	2
101_130_BN003.wiff	Library Peptides	Nptxr	AELLLLQSTAEQLR	AELLLLQSTAEQLR	35.71	1379	3
101_130_BN004.wiff	Library Peptides	Nptxr	AELLLLQSTAEQLR	AELLLLQSTAEQLR	35.51	1586	4
101_130_BN005.wiff	Library Peptides	Nptxr	AELLLLQSTAEQLR	AELLLLQSTAEQLR	35.57	1963	5
101_130_BN006.wiff	Library Peptides	Nptxr	AELLLLQSTAEQLR	AELLLLQSTAEQLR	35.4	2941	6
101_130_BN007.wiff	Library Peptides	Nptxr	AELLLLQSTAEQLR	AELLLLQSTAEQLR	35.25	4039	7
101_130_BN008.wiff	Library Peptides	Nptxr	AELLLLQSTAEQLR	AELLLLQSTAEQLR	35.35	2238	8
101_130_BN009.wiff	Library Peptides	Nptxr	AELLLLQSTAEQLR	AELLLLQSTAEQLR	35.29	4676	9
101_130_BN010.wiff	Library Peptides	Nptxr	AELLLLQSTAEQLR	AELLLLQSTAEQLR	35.39	11929	10
101_130_BN011.wiff	Library Peptides	Nptxr	AELLLLQSTAEQLR	AELLLLQSTAEQLR	35.32	24130	11
101_130_BN012.wiff	Library Peptides	Nptxr	AELLLLQSTAEQLR	AELLLLQSTAEQLR	35.36	29491	12
101_130_BN013.wiff	Library Peptides	Nptxr	AELLLLQSTAEQLR	AELLLLQSTAEQLR	35.3	70074	13
101_130_BN014.wiff	Library Peptides	Nptxr	AELLLLQSTAEQLR	AELLLLQSTAEQLR	35.2	132629	14
101_130_BN015.wiff	Library Peptides	Nptxr	AELLLLQSTAEQLR	AELLLLQSTAEQLR	35.44	174098	15
101_130_BN016.wiff	Library Peptides	Nptxr	AELLLLQSTAEQLR	AELLLLQSTAEQLR	35.4	265584	16
101_130_BN017.wiff	Library Peptides	Nptxr	AELLLLQSTAEQLR	AELLLLQSTAEQLR	35.6	349212	17
101_130_BN018.wiff	Library Peptides	Nptxr	AELLLLQSTAEQLR	AELLLLQSTAEQLR	35.61	362789	18
101_130_BN019.wiff	Library Peptides	Nptxr	AELLLLQSTAEQLR	AELLLLQSTAEQLR	35.78	190789	19
101_130_BN020.wiff	Library Peptides	Nptxr	AELLLLQSTAEQLR	AELLLLQSTAEQLR	35.53	148125	20
101_130_BN021.wiff	Library Peptides	Nptxr	AELLLLQSTAEQLR	AELLLLQSTAEQLR	35.45	115362	21
101_130_BN022.wiff	Library Peptides	Nptxr	AELLLLQSTAEQLR	AELLLLQSTAEQLR	35.59	43523	22
101_130_BN023.wiff	Library Peptides	Nptxr	AELLLLQSTAEQLR	AELLLLQSTAEQLR	35.61	32692	23
101_130_BN024.wiff	Library Peptides	Nptxr	AELLLLQSTAEQLR	AELLLLQSTAEQLR	36.01	31883	24
101_130_BN025.wiff	Library Peptides	Nptxr	AELLLLQSTAEQLR	AELLLLQSTAEQLR	36.44	43314	25
101_130_BN026.wiff	Library Peptides	Nptxr	AELLLLQSTAEQLR	AELLLLQSTAEQLR	38.9	4019	26
101_130_BN027.wiff	Library Peptides	Nptxr	AELLLLQSTAEQLR	AELLLLQSTAEQLR	38.58	7384	27
101_130_BN028.wiff	Library Peptides	Nptxr	AELLLLQSTAEQLR	AELLLLQSTAEQLR	35.81	6582	28
101_130_BN029.wiff	Library Peptides	Nptxr	AELLLLQSTAEQLR	AELLLLQSTAEQLR	34.96	5092	29
101_130_BN030.wiff	Library Peptides	Nptxr	AELLLLQSTAEQLR	AELLLLQSTAEQLR	35.13	8597	30
101_130_BN001.wiff	Library Peptides	Nsf	AENSSLNLIGK	AENSSLNLIGK	23.74	1011	1
101_130_BN002.wiff	Library Peptides	Nsf	AENSSLNLIGK	AENSSLNLIGK	23.18	311	2
101_130_BN003.wiff	Library Peptides	Nsf	AENSSLNLIGK	AENSSLNLIGK	23.12	419	3
101_130_BN004.wiff	Library Peptides	Nsf	AENSSLNLIGK	AENSSLNLIGK	23.06	745	4
101_130_BN005.wiff	Library Peptides	Nsf	AENSSLNLIGK	AENSSLNLIGK	22.72	605	5
101_130_BN006.wiff	Library Peptides	Nsf	AENSSLNLIGK	AENSSLNLIGK	22.84	184	6
101_130_BN007.wiff	Library Peptides	Nsf	AENSSLNLIGK	AENSSLNLIGK	22.61	1038	7
101_130_BN008.wiff	Library Peptides	Nsf	AENSSLNLIGK	AENSSLNLIGK	22.65	1417	8
101_130_BN009.wiff	Library Peptides	Nsf	AENSSLNLIGK	AENSSLNLIGK	22.92	1041	9
101_130_BN010.wiff	Library Peptides	Nsf	AENSSLNLIGK	AENSSLNLIGK	22.95	1433	10
101_130_BN011.wiff	Library Peptides	Nsf	AENSSLNLIGK	AENSSLNLIGK	22.92	1225	11
101_130_BN012.wiff	Library Peptides	Nsf	AENSSLNLIGK	AENSSLNLIGK	22.84	817	12
101_130_BN013.wiff	Library Peptides	Nsf	AENSSLNLIGK	AENSSLNLIGK	22.72	288	13
101_130_BN014.wiff	Library Peptides	Nsf	AENSSLNLIGK	AENSSLNLIGK	22.92	385	14
101_130_BN015.wiff	Library Peptides	Nsf	AENSSLNLIGK	AENSSLNLIGK	22.96	197	15
101_130_BN016.wiff	Library Peptides	Nsf	AENSSLNLIGK	AENSSLNLIGK	23.08	355	16
101_130_BN017.wiff	Library Peptides	Nsf	AENSSLNLIGK	AENSSLNLIGK	23.17	353	17
101_130_BN018.wiff	Library Peptides	Nsf	AENSSLNLIGK	AENSSLNLIGK	23.24	1031	18
101_130_BN019.wiff	Library Peptides	Nsf	AENSSLNLIGK	AENSSLNLIGK	23.09	1003	19
101_130_BN020.wiff	Library Peptides	Nsf	AENSSLNLIGK	AENSSLNLIGK	23.15	379	20
101_130_BN021.wiff	Library Peptides	Nsf	AENSSLNLIGK	AENSSLNLIGK	22.93	554	21
101_130_BN022.wiff	Library Peptides	Nsf	AENSSLNLIGK	AENSSLNLIGK	22.95	629	22
101_130_BN023.wiff	Library Peptides	Nsf	AENSSLNLIGK	AENSSLNLIGK	23.17	339	23
101_130_BN024.wiff	Library Peptides	Nsf	AENSSLNLIGK	AENSSLNLIGK	22.87	919	24
101_130_BN025.wiff	Library Peptides	Nsf	AENSSLNLIGK	AENSSLNLIGK	23.33	842	25
101_130_BN026.wiff	Library Peptides	Nsf	AENSSLNLIGK	AENSSLNLIGK	23.05	659	26
101_130_BN027.wiff	Library Peptides	Nsf	AENSSLNLIGK	AENSSLNLIGK	23.36	442	27
101_130_BN028.wiff	Library Peptides	Nsf	AENSSLNLIGK	AENSSLNLIGK	23.39	20563	28
101_130_BN029.wiff	Library Peptides	Nsf	AENSSLNLIGK	AENSSLNLIGK	23.39	17299	29
101_130_BN030.wiff	Library Peptides	Nsf	AENSSLNLIGK	AENSSLNLIGK	22.99	14925	30
101_130_BN001.wiff	Library Peptides	Homer3	ANTVYGLGFASEQQLTQFAEK	ANTVYGLGFASEQQLTQFAEK	36.29	1655	1
101_130_BN002.wiff	Library Peptides	Homer3	ANTVYGLGFASEQQLTQFAEK	ANTVYGLGFASEQQLTQFAEK	35.58	4355	2
101_130_BN003.wiff	Library Peptides	Homer3	ANTVYGLGFASEQQLTQFAEK	ANTVYGLGFASEQQLTQFAEK	35.91	4127	3
101_130_BN004.wiff	Library Peptides	Homer3	ANTVYGLGFASEQQLTQFAEK	ANTVYGLGFASEQQLTQFAEK	35.81	4916	4
101_130_BN005.wiff	Library Peptides	Homer3	ANTVYGLGFASEQQLTQFAEK	ANTVYGLGFASEQQLTQFAEK	35.83	7524	5
101_130_BN006.wiff	Library Peptides	Homer3	ANTVYGLGFASEQQLTQFAEK	ANTVYGLGFASEQQLTQFAEK	35.67	30785	6
101_130_BN007.wiff	Library Peptides	Homer3	ANTVYGLGFASEQQLTQFAEK	ANTVYGLGFASEQQLTQFAEK	35.58	59957	7
101_130_BN008.wiff	Library Peptides	Homer3	ANTVYGLGFASEQQLTQFAEK	ANTVYGLGFASEQQLTQFAEK	35.56	91721	8
101_130_BN009.wiff	Library Peptides	Homer3	ANTVYGLGFASEQQLTQFAEK	ANTVYGLGFASEQQLTQFAEK	35.5	55043	9
101_130_BN010.wiff	Library Peptides	Homer3	ANTVYGLGFASEQQLTQFAEK	ANTVYGLGFASEQQLTQFAEK	35.61	98375	10
101_130_BN011.wiff	Library Peptides	Homer3	ANTVYGLGFASEQQLTQFAEK	ANTVYGLGFASEQQLTQFAEK	35.51	152908	11
101_130_BN012.wiff	Library Peptides	Homer3	ANTVYGLGFASEQQLTQFAEK	ANTVYGLGFASEQQLTQFAEK	35.56	129988	12
101_130_BN013.wiff	Library Peptides	Homer3	ANTVYGLGFASEQQLTQFAEK	ANTVYGLGFASEQQLTQFAEK	35.5	148955	13
101_130_BN014.wiff	Library Peptides	Homer3	ANTVYGLGFASEQQLTQFAEK	ANTVYGLGFASEQQLTQFAEK	35.43	131176	14
101_130_BN015.wiff	Library Peptides	Homer3	ANTVYGLGFASEQQLTQFAEK	ANTVYGLGFASEQQLTQFAEK	35.6	95745	15
101_130_BN016.wiff	Library Peptides	Homer3	ANTVYGLGFASEQQLTQFAEK	ANTVYGLGFASEQQLTQFAEK	35.63	112722	16
101_130_BN017.wiff	Library Peptides	Homer3	ANTVYGLGFASEQQLTQFAEK	ANTVYGLGFASEQQLTQFAEK	35.76	141333	17
101_130_BN018.wiff	Library Peptides	Homer3	ANTVYGLGFASEQQLTQFAEK	ANTVYGLGFASEQQLTQFAEK	35.8	133964	18
101_130_BN019.wiff	Library Peptides	Homer3	ANTVYGLGFASEQQLTQFAEK	ANTVYGLGFASEQQLTQFAEK	35.94	87293	19
101_130_BN020.wiff	Library Peptides	Homer3	ANTVYGLGFASEQQLTQFAEK	ANTVYGLGFASEQQLTQFAEK	35.73	77862	20
101_130_BN021.wiff	Library Peptides	Homer3	ANTVYGLGFASEQQLTQFAEK	ANTVYGLGFASEQQLTQFAEK	35.7	64971	21
101_130_BN022.wiff	Library Peptides	Homer3	ANTVYGLGFASEQQLTQFAEK	ANTVYGLGFASEQQLTQFAEK	35.75	51117	22
101_130_BN023.wiff	Library Peptides	Homer3	ANTVYGLGFASEQQLTQFAEK	ANTVYGLGFASEQQLTQFAEK	35.79	56570	23
101_130_BN024.wiff	Library Peptides	Homer3	ANTVYGLGFASEQQLTQFAEK	ANTVYGLGFASEQQLTQFAEK	36.21	97205	24
101_130_BN025.wiff	Library Peptides	Homer3	ANTVYGLGFASEQQLTQFAEK	ANTVYGLGFASEQQLTQFAEK	36.44	116153	25
101_130_BN026.wiff	Library Peptides	Homer3	ANTVYGLGFASEQQLTQFAEK	ANTVYGLGFASEQQLTQFAEK	39.83	614004	26
101_130_BN027.wiff	Library Peptides	Homer3	ANTVYGLGFASEQQLTQFAEK	ANTVYGLGFASEQQLTQFAEK	38.48	565723	27
101_130_BN028.wiff	Library Peptides	Homer3	ANTVYGLGFASEQQLTQFAEK	ANTVYGLGFASEQQLTQFAEK	35.94	254770	28
101_130_BN029.wiff	Library Peptides	Homer3	ANTVYGLGFASEQQLTQFAEK	ANTVYGLGFASEQQLTQFAEK	35.71	98457	29
101_130_BN030.wiff	Library Peptides	Homer3	ANTVYGLGFASEQQLTQFAEK	ANTVYGLGFASEQQLTQFAEK	35.38	96303	30
101_130_BN001.wiff	Library Peptides	SIK3	ASLMAPFSYGHRPLSK	ASLM[+16]APFSYGHRPLSK	22.6	706	1
101_130_BN002.wiff	Library Peptides	SIK3	ASLMAPFSYGHRPLSK	ASLM[+16]APFSYGHRPLSK	22.88	250	2
101_130_BN003.wiff	Library Peptides	SIK3	ASLMAPFSYGHRPLSK	ASLM[+16]APFSYGHRPLSK	22.94	825	3
101_130_BN004.wiff	Library Peptides	SIK3	ASLMAPFSYGHRPLSK	ASLM[+16]APFSYGHRPLSK	22.89	1687	4
101_130_BN005.wiff	Library Peptides	SIK3	ASLMAPFSYGHRPLSK	ASLM[+16]APFSYGHRPLSK	22.86	251	5
101_130_BN006.wiff	Library Peptides	SIK3	ASLMAPFSYGHRPLSK	ASLM[+16]APFSYGHRPLSK	22.93	1474	6
101_130_BN007.wiff	Library Peptides	SIK3	ASLMAPFSYGHRPLSK	ASLM[+16]APFSYGHRPLSK	22.85	1613	7
101_130_BN008.wiff	Library Peptides	SIK3	ASLMAPFSYGHRPLSK	ASLM[+16]APFSYGHRPLSK	22.7	2375	8
101_130_BN009.wiff	Library Peptides	SIK3	ASLMAPFSYGHRPLSK	ASLM[+16]APFSYGHRPLSK	22.64	1226	9
101_130_BN010.wiff	Library Peptides	SIK3	ASLMAPFSYGHRPLSK	ASLM[+16]APFSYGHRPLSK	22.55	1161	10
101_130_BN011.wiff	Library Peptides	SIK3	ASLMAPFSYGHRPLSK	ASLM[+16]APFSYGHRPLSK	22.55	1802	11
101_130_BN012.wiff	Library Peptides	SIK3	ASLMAPFSYGHRPLSK	ASLM[+16]APFSYGHRPLSK	22.56	3336	12
101_130_BN013.wiff	Library Peptides	SIK3	ASLMAPFSYGHRPLSK	ASLM[+16]APFSYGHRPLSK	22.56	4442	13
101_130_BN014.wiff	Library Peptides	SIK3	ASLMAPFSYGHRPLSK	ASLM[+16]APFSYGHRPLSK	22.49	6710	14
101_130_BN015.wiff	Library Peptides	SIK3	ASLMAPFSYGHRPLSK	ASLM[+16]APFSYGHRPLSK	22.62	8773	15
101_130_BN016.wiff	Library Peptides	SIK3	ASLMAPFSYGHRPLSK	ASLM[+16]APFSYGHRPLSK	22.65	16380	16
101_130_BN017.wiff	Library Peptides	SIK3	ASLMAPFSYGHRPLSK	ASLM[+16]APFSYGHRPLSK	22.79	31441	17
101_130_BN018.wiff	Library Peptides	SIK3	ASLMAPFSYGHRPLSK	ASLM[+16]APFSYGHRPLSK	22.78	25934	18
101_130_BN019.wiff	Library Peptides	SIK3	ASLMAPFSYGHRPLSK	ASLM[+16]APFSYGHRPLSK	22.91	19591	19
101_130_BN020.wiff	Library Peptides	SIK3	ASLMAPFSYGHRPLSK	ASLM[+16]APFSYGHRPLSK	22.75	25241	20
101_130_BN021.wiff	Library Peptides	SIK3	ASLMAPFSYGHRPLSK	ASLM[+16]APFSYGHRPLSK	22.68	15576	21
101_130_BN022.wiff	Library Peptides	SIK3	ASLMAPFSYGHRPLSK	ASLM[+16]APFSYGHRPLSK	22.8	13213	22
101_130_BN023.wiff	Library Peptides	SIK3	ASLMAPFSYGHRPLSK	ASLM[+16]APFSYGHRPLSK	22.78	7190	23
101_130_BN024.wiff	Library Peptides	SIK3	ASLMAPFSYGHRPLSK	ASLM[+16]APFSYGHRPLSK	23.02	2374	24
101_130_BN025.wiff	Library Peptides	SIK3	ASLMAPFSYGHRPLSK	ASLM[+16]APFSYGHRPLSK	23.05	972	25
101_130_BN026.wiff	Library Peptides	SIK3	ASLMAPFSYGHRPLSK	ASLM[+16]APFSYGHRPLSK	23.18	820	26
101_130_BN027.wiff	Library Peptides	SIK3	ASLMAPFSYGHRPLSK	ASLM[+16]APFSYGHRPLSK	23.07	401	27
101_130_BN028.wiff	Library Peptides	SIK3	ASLMAPFSYGHRPLSK	ASLM[+16]APFSYGHRPLSK	22.9	4404	28
101_130_BN029.wiff	Library Peptides	SIK3	ASLMAPFSYGHRPLSK	ASLM[+16]APFSYGHRPLSK	22.75	1969	29
101_130_BN030.wiff	Library Peptides	SIK3	ASLMAPFSYGHRPLSK	ASLM[+16]APFSYGHRPLSK	22.4	3533	30
101_130_BN001.wiff	Library Peptides	ltpr1	AVLNPTNADILIETK	AVLNPTNADILIETK	32.34	3430	1
101_130_BN002.wiff	Library Peptides	ltpr1	AVLNPTNADILIETK	AVLNPTNADILIETK	31.98	1289	2
101_130_BN003.wiff	Library Peptides	ltpr1	AVLNPTNADILIETK	AVLNPTNADILIETK	30.85	1143	3
101_130_BN004.wiff	Library Peptides	ltpr1	AVLNPTNADILIETK	AVLNPTNADILIETK	31.15	2659	4
101_130_BN005.wiff	Library Peptides	ltpr1	AVLNPTNADILIETK	AVLNPTNADILIETK	30.85	1349	5
101_130_BN006.wiff	Library Peptides	ltpr1	AVLNPTNADILIETK	AVLNPTNADILIETK	30.92	2426	6
101_130_BN007.wiff	Library Peptides	ltpr1	AVLNPTNADILIETK	AVLNPTNADILIETK	30.77	5797	7
101_130_BN008.wiff	Library Peptides	ltpr1	AVLNPTNADILIETK	AVLNPTNADILIETK	30.85	3342	8
101_130_BN009.wiff	Library Peptides	ltpr1	AVLNPTNADILIETK	AVLNPTNADILIETK	30.78	6299	9
101_130_BN010.wiff	Library Peptides	ltpr1	AVLNPTNADILIETK	AVLNPTNADILIETK	30.87	7126	10
101_130_BN011.wiff	Library Peptides	ltpr1	AVLNPTNADILIETK	AVLNPTNADILIETK	30.86	3213	11
101_130_BN012.wiff	Library Peptides	ltpr1	AVLNPTNADILIETK	AVLNPTNADILIETK	31.09	2730	12
101_130_BN013.wiff	Library Peptides	ltpr1	AVLNPTNADILIETK	AVLNPTNADILIETK	30.76	6144	13
101_130_BN014.wiff	Library Peptides	ltpr1	AVLNPTNADILIETK	AVLNPTNADILIETK	30.77	6880	14
101_130_BN015.wiff	Library Peptides	ltpr1	AVLNPTNADILIETK	AVLNPTNADILIETK	30.83	5512	15
101_130_BN016.wiff	Library Peptides	ltpr1	AVLNPTNADILIETK	AVLNPTNADILIETK	30.86	5155	16
101_130_BN017.wiff	Library Peptides	ltpr1	AVLNPTNADILIETK	AVLNPTNADILIETK	30.92	9239	17
101_130_BN018.wiff	Library Peptides	ltpr1	AVLNPTNADILIETK	AVLNPTNADILIETK	31.33	2523	18
101_130_BN019.wiff	Library Peptides	ltpr1	AVLNPTNADILIETK	AVLNPTNADILIETK	30.99	8815	19
101_130_BN020.wiff	Library Peptides	ltpr1	AVLNPTNADILIETK	AVLNPTNADILIETK	31.18	3343	20
101_130_BN021.wiff	Library Peptides	ltpr1	AVLNPTNADILIETK	AVLNPTNADILIETK	30.75	7921	21
101_130_BN022.wiff	Library Peptides	ltpr1	AVLNPTNADILIETK	AVLNPTNADILIETK	31.21	2741	22
101_130_BN023.wiff	Library Peptides	ltpr1	AVLNPTNADILIETK	AVLNPTNADILIETK	31.24	5961	23
101_130_BN024.wiff	Library Peptides	ltpr1	AVLNPTNADILIETK	AVLNPTNADILIETK	31.29	6958	24
101_130_BN025.wiff	Library Peptides	ltpr1	AVLNPTNADILIETK	AVLNPTNADILIETK	31.83	1565	25
101_130_BN026.wiff	Library Peptides	ltpr1	AVLNPTNADILIETK	AVLNPTNADILIETK	33.74	19879	26
101_130_BN027.wiff	Library Peptides	ltpr1	AVLNPTNADILIETK	AVLNPTNADILIETK	33.08	34539	27
101_130_BN028.wiff	Library Peptides	ltpr1	AVLNPTNADILIETK	AVLNPTNADILIETK	31.37	92847	28
101_130_BN029.wiff	Library Peptides	ltpr1	AVLNPTNADILIETK	AVLNPTNADILIETK	31.2	46581	29
101_130_BN030.wiff	Library Peptides	ltpr1	AVLNPTNADILIETK	AVLNPTNADILIETK	30.81	37886	30
101_130_BN001.wiff	Library Peptides	Ppp3r1	DTQLQQIVDK	DTQLQQIVDK	23.46	41480	1
101_130_BN002.wiff	Library Peptides	Ppp3r1	DTQLQQIVDK	DTQLQQIVDK	23.65	39361	2
101_130_BN003.wiff	Library Peptides	Ppp3r1	DTQLQQIVDK	DTQLQQIVDK	23.7	44740	3
101_130_BN004.wiff	Library Peptides	Ppp3r1	DTQLQQIVDK	DTQLQQIVDK	23.55	51990	4
101_130_BN005.wiff	Library Peptides	Ppp3r1	DTQLQQIVDK	DTQLQQIVDK	23.55	19546	5
101_130_BN006.wiff	Library Peptides	Ppp3r1	DTQLQQIVDK	DTQLQQIVDK	23.51	34133	6
101_130_BN007.wiff	Library Peptides	Ppp3r1	DTQLQQIVDK	DTQLQQIVDK	23.45	65460	7
101_130_BN008.wiff	Library Peptides	Ppp3r1	DTQLQQIVDK	DTQLQQIVDK	23.39	291510	8
101_130_BN009.wiff	Library Peptides	Ppp3r1	DTQLQQIVDK	DTQLQQIVDK	23.38	332286	9
101_130_BN010.wiff	Library Peptides	Ppp3r1	DTQLQQIVDK	DTQLQQIVDK	23.4	394986	10
101_130_BN011.wiff	Library Peptides	Ppp3r1	DTQLQQIVDK	DTQLQQIVDK	23.44	219555	11
101_130_BN012.wiff	Library Peptides	Ppp3r1	DTQLQQIVDK	DTQLQQIVDK	23.4	105008	12
101_130_BN013.wiff	Library Peptides	Ppp3r1	DTQLQQIVDK	DTQLQQIVDK	23.43	121310	13
101_130_BN014.wiff	Library Peptides	Ppp3r1	DTQLQQIVDK	DTQLQQIVDK	23.35	168240	14
101_130_BN015.wiff	Library Peptides	Ppp3r1	DTQLQQIVDK	DTQLQQIVDK	23.45	128210	15
101_130_BN016.wiff	Library Peptides	Ppp3r1	DTQLQQIVDK	DTQLQQIVDK	23.49	156994	16
101_130_BN017.wiff	Library Peptides	Ppp3r1	DTQLQQIVDK	DTQLQQIVDK	23.63	154768	17
101_130_BN018.wiff	Library Peptides	Ppp3r1	DTQLQQIVDK	DTQLQQIVDK	23.64	272084	18
101_130_BN019.wiff	Library Peptides	Ppp3r1	DTQLQQIVDK	DTQLQQIVDK	23.71	130018	19
101_130_BN020.wiff	Library Peptides	Ppp3r1	DTQLQQIVDK	DTQLQQIVDK	23.6	390290	20
101_130_BN021.wiff	Library Peptides	Ppp3r1	DTQLQQIVDK	DTQLQQIVDK	23.57	800902	21
101_130_BN022.wiff	Library Peptides	Ppp3r1	DTQLQQIVDK	DTQLQQIVDK	23.63	650320	22
101_130_BN023.wiff	Library Peptides	Ppp3r1	DTQLQQIVDK	DTQLQQIVDK	23.57	538859	23
101_130_BN024.wiff	Library Peptides	Ppp3r1	DTQLQQIVDK	DTQLQQIVDK	23.64	444681	24
101_130_BN025.wiff	Library Peptides	Ppp3r1	DTQLQQIVDK	DTQLQQIVDK	23.64	280468	25
101_130_BN026.wiff	Library Peptides	Ppp3r1	DTQLQQIVDK	DTQLQQIVDK	23.7	139004	26
101_130_BN027.wiff	Library Peptides	Ppp3r1	DTQLQQIVDK	DTQLQQIVDK	23.79	109985	27
101_130_BN028.wiff	Library Peptides	Ppp3r1	DTQLQQIVDK	DTQLQQIVDK	23.67	80946	28
101_130_BN029.wiff	Library Peptides	Ppp3r1	DTQLQQIVDK	DTQLQQIVDK	23.54	54469	29
101_130_BN030.wiff	Library Peptides	Ppp3r1	DTQLQQIVDK	DTQLQQIVDK	23.39	67532	30
101_130_BN001.wiff	Library Peptides	Homer3	EAPDTAEREETQQQVQDLETR	EAPDTAEREETQQQVQDLETR	21.65	316	1
101_130_BN002.wiff	Library Peptides	Homer3	EAPDTAEREETQQQVQDLETR	EAPDTAEREETQQQVQDLETR	21.17	115	2
101_130_BN003.wiff	Library Peptides	Homer3	EAPDTAEREETQQQVQDLETR	EAPDTAEREETQQQVQDLETR	21.28	1341	3
101_130_BN004.wiff	Library Peptides	Homer3	EAPDTAEREETQQQVQDLETR	EAPDTAEREETQQQVQDLETR	20.9	2151	4
101_130_BN005.wiff	Library Peptides	Homer3	EAPDTAEREETQQQVQDLETR	EAPDTAEREETQQQVQDLETR	20.97	4655	5
101_130_BN006.wiff	Library Peptides	Homer3	EAPDTAEREETQQQVQDLETR	EAPDTAEREETQQQVQDLETR	20.95	8570	6
101_130_BN007.wiff	Library Peptides	Homer3	EAPDTAEREETQQQVQDLETR	EAPDTAEREETQQQVQDLETR	20.85	21030	7
101_130_BN008.wiff	Library Peptides	Homer3	EAPDTAEREETQQQVQDLETR	EAPDTAEREETQQQVQDLETR	20.84	22984	8
101_130_BN009.wiff	Library Peptides	Homer3	EAPDTAEREETQQQVQDLETR	EAPDTAEREETQQQVQDLETR	20.84	17412	9
101_130_BN010.wiff	Library Peptides	Homer3	EAPDTAEREETQQQVQDLETR	EAPDTAEREETQQQVQDLETR	20.85	36570	10
101_130_BN011.wiff	Library Peptides	Homer3	EAPDTAEREETQQQVQDLETR	EAPDTAEREETQQQVQDLETR	20.85	18599	11
101_130_BN012.wiff	Library Peptides	Homer3	EAPDTAEREETQQQVQDLETR	EAPDTAEREETQQQVQDLETR	20.84	25694	12
101_130_BN013.wiff	Library Peptides	Homer3	EAPDTAEREETQQQVQDLETR	EAPDTAEREETQQQVQDLETR	20.83	13785	13
101_130_BN014.wiff	Library Peptides	Homer3	EAPDTAEREETQQQVQDLETR	EAPDTAEREETQQQVQDLETR	20.8	29582	14
101_130_BN015.wiff	Library Peptides	Homer3	EAPDTAEREETQQQVQDLETR	EAPDTAEREETQQQVQDLETR	20.86	21745	15
101_130_BN016.wiff	Library Peptides	Homer3	EAPDTAEREETQQQVQDLETR	EAPDTAEREETQQQVQDLETR	20.94	25251	16
101_130_BN017.wiff	Library Peptides	Homer3	EAPDTAEREETQQQVQDLETR	EAPDTAEREETQQQVQDLETR	21.03	24030	17
101_130_BN018.wiff	Library Peptides	Homer3	EAPDTAEREETQQQVQDLETR	EAPDTAEREETQQQVQDLETR	21.06	31156	18
101_130_BN019.wiff	Library Peptides	Homer3	EAPDTAEREETQQQVQDLETR	EAPDTAEREETQQQVQDLETR	21.11	20361	19
101_130_BN020.wiff	Library Peptides	Homer3	EAPDTAEREETQQQVQDLETR	EAPDTAEREETQQQVQDLETR	21	17059	20
101_130_BN021.wiff	Library Peptides	Homer3	EAPDTAEREETQQQVQDLETR	EAPDTAEREETQQQVQDLETR	21	18482	21
101_130_BN022.wiff	Library Peptides	Homer3	EAPDTAEREETQQQVQDLETR	EAPDTAEREETQQQVQDLETR	21.07	11389	22
101_130_BN023.wiff	Library Peptides	Homer3	EAPDTAEREETQQQVQDLETR	EAPDTAEREETQQQVQDLETR	20.99	12793	23
101_130_BN024.wiff	Library Peptides	Homer3	EAPDTAEREETQQQVQDLETR	EAPDTAEREETQQQVQDLETR	21.04	11215	24
101_130_BN025.wiff	Library Peptides	Homer3	EAPDTAEREETQQQVQDLETR	EAPDTAEREETQQQVQDLETR	21.07	10311	25
101_130_BN026.wiff	Library Peptides	Homer3	EAPDTAEREETQQQVQDLETR	EAPDTAEREETQQQVQDLETR	24.54	45895	26
101_130_BN027.wiff	Library Peptides	Homer3	EAPDTAEREETQQQVQDLETR	EAPDTAEREETQQQVQDLETR	24.35	33931	27
101_130_BN028.wiff	Library Peptides	Homer3	EAPDTAEREETQQQVQDLETR	EAPDTAEREETQQQVQDLETR	21.05	11609	28
101_130_BN029.wiff	Library Peptides	Homer3	EAPDTAEREETQQQVQDLETR	EAPDTAEREETQQQVQDLETR	20.96	14572	29
101_130_BN030.wiff	Library Peptides	Homer3	EAPDTAEREETQQQVQDLETR	EAPDTAEREETQQQVQDLETR	20.83	17300	30
101_130_BN001.wiff	Library Peptides	Shank1	FLEYVQLGTSDK	FLEYVQLGTSDK	30.3	433	1
101_130_BN002.wiff	Library Peptides	Shank1	FLEYVQLGTSDK	FLEYVQLGTSDK	30.33	1236	2
101_130_BN003.wiff	Library Peptides	Shank1	FLEYVQLGTSDK	FLEYVQLGTSDK	29.66	271	3
101_130_BN004.wiff	Library Peptides	Shank1	FLEYVQLGTSDK	FLEYVQLGTSDK	29.65	764	4
101_130_BN005.wiff	Library Peptides	Shank1	FLEYVQLGTSDK	FLEYVQLGTSDK	29.71	1913	5
101_130_BN006.wiff	Library Peptides	Shank1	FLEYVQLGTSDK	FLEYVQLGTSDK	29.71	616	6
101_130_BN007.wiff	Library Peptides	Shank1	FLEYVQLGTSDK	FLEYVQLGTSDK	29.49	1653	7
101_130_BN008.wiff	Library Peptides	Shank1	FLEYVQLGTSDK	FLEYVQLGTSDK	29.94	3887	8
101_130_BN009.wiff	Library Peptides	Shank1	FLEYVQLGTSDK	FLEYVQLGTSDK	29.48	1720	9
101_130_BN010.wiff	Library Peptides	Shank1	FLEYVQLGTSDK	FLEYVQLGTSDK	29.05	737	10
101_130_BN011.wiff	Library Peptides	Shank1	FLEYVQLGTSDK	FLEYVQLGTSDK	29.06	1244	11
101_130_BN012.wiff	Library Peptides	Shank1	FLEYVQLGTSDK	FLEYVQLGTSDK	29.61	1111	12
101_130_BN013.wiff	Library Peptides	Shank1	FLEYVQLGTSDK	FLEYVQLGTSDK	29.52	1327	13
101_130_BN014.wiff	Library Peptides	Shank1	FLEYVQLGTSDK	FLEYVQLGTSDK	29.51	1092	14
101_130_BN015.wiff	Library Peptides	Shank1	FLEYVQLGTSDK	FLEYVQLGTSDK	29.97	1578	15
101_130_BN016.wiff	Library Peptides	Shank1	FLEYVQLGTSDK	FLEYVQLGTSDK	29.52	1781	16
101_130_BN017.wiff	Library Peptides	Shank1	FLEYVQLGTSDK	FLEYVQLGTSDK	29.64	1462	17
101_130_BN018.wiff	Library Peptides	Shank1	FLEYVQLGTSDK	FLEYVQLGTSDK	29.67	7199	18
101_130_BN019.wiff	Library Peptides	Shank1	FLEYVQLGTSDK	FLEYVQLGTSDK	29.81	6511	19
101_130_BN020.wiff	Library Peptides	Shank1	FLEYVQLGTSDK	FLEYVQLGTSDK	29.61	6324	20
101_130_BN021.wiff	Library Peptides	Shank1	FLEYVQLGTSDK	FLEYVQLGTSDK	29.46	14216	21
101_130_BN022.wiff	Library Peptides	Shank1	FLEYVQLGTSDK	FLEYVQLGTSDK	29.63	12675	22
101_130_BN023.wiff	Library Peptides	Shank1	FLEYVQLGTSDK	FLEYVQLGTSDK	29.6	12748	23
101_130_BN024.wiff	Library Peptides	Shank1	FLEYVQLGTSDK	FLEYVQLGTSDK	29.77	11867	24
101_130_BN025.wiff	Library Peptides	Shank1	FLEYVQLGTSDK	FLEYVQLGTSDK	29.74	15431	25
101_130_BN026.wiff	Library Peptides	Shank1	FLEYVQLGTSDK	FLEYVQLGTSDK	31.81	67121	26
101_130_BN027.wiff	Library Peptides	Shank1	FLEYVQLGTSDK	FLEYVQLGTSDK	31.09	100192	27
101_130_BN028.wiff	Library Peptides	Shank1	FLEYVQLGTSDK	FLEYVQLGTSDK	29.76	105767	28
101_130_BN029.wiff	Library Peptides	Shank1	FLEYVQLGTSDK	FLEYVQLGTSDK	29.6	48557	29
101_130_BN030.wiff	Library Peptides	Shank1	FLEYVQLGTSDK	FLEYVQLGTSDK	29.32	54105	30
101_130_BN001.wiff	Library Peptides	Shank1	FNPDATIWTAK	FNPDATIWTAK	29.37	659	1
101_130_BN002.wiff	Library Peptides	Shank1	FNPDATIWTAK	FNPDATIWTAK	29.72	1311	2
101_130_BN003.wiff	Library Peptides	Shank1	FNPDATIWTAK	FNPDATIWTAK	28.85	2865	3
101_130_BN004.wiff	Library Peptides	Shank1	FNPDATIWTAK	FNPDATIWTAK	28.8	4063	4
101_130_BN005.wiff	Library Peptides	Shank1	FNPDATIWTAK	FNPDATIWTAK	28.96	3636	5
101_130_BN006.wiff	Library Peptides	Shank1	FNPDATIWTAK	FNPDATIWTAK	28.8	3225	6
101_130_BN007.wiff	Library Peptides	Shank1	FNPDATIWTAK	FNPDATIWTAK	28.46	8312	7
101_130_BN008.wiff	Library Peptides	Shank1	FNPDATIWTAK	FNPDATIWTAK	28.67	7129	8
101_130_BN009.wiff	Library Peptides	Shank1	FNPDATIWTAK	FNPDATIWTAK	28.62	8271	9
101_130_BN010.wiff	Library Peptides	Shank1	FNPDATIWTAK	FNPDATIWTAK	28.79	7543	10
101_130_BN011.wiff	Library Peptides	Shank1	FNPDATIWTAK	FNPDATIWTAK	28.62	2174	11
101_130_BN012.wiff	Library Peptides	Shank1	FNPDATIWTAK	FNPDATIWTAK	28.96	5181	12
101_130_BN013.wiff	Library Peptides	Shank1	FNPDATIWTAK	FNPDATIWTAK	28.69	3185	13
101_130_BN014.wiff	Library Peptides	Shank1	FNPDATIWTAK	FNPDATIWTAK	28.68	3624	14
101_130_BN015.wiff	Library Peptides	Shank1	FNPDATIWTAK	FNPDATIWTAK	29.19	7274	15
101_130_BN016.wiff	Library Peptides	Shank1	FNPDATIWTAK	FNPDATIWTAK	28.74	7075	16
101_130_BN017.wiff	Library Peptides	Shank1	FNPDATIWTAK	FNPDATIWTAK	29	6019	17
101_130_BN018.wiff	Library Peptides	Shank1	FNPDATIWTAK	FNPDATIWTAK	28.87	9346	18
101_130_BN019.wiff	Library Peptides	Shank1	FNPDATIWTAK	FNPDATIWTAK	28.93	14735	19
101_130_BN020.wiff	Library Peptides	Shank1	FNPDATIWTAK	FNPDATIWTAK	28.78	6764	20
101_130_BN021.wiff	Library Peptides	Shank1	FNPDATIWTAK	FNPDATIWTAK	28.67	6650	21
101_130_BN022.wiff	Library Peptides	Shank1	FNPDATIWTAK	FNPDATIWTAK	28.83	5468	22
101_130_BN023.wiff	Library Peptides	Shank1	FNPDATIWTAK	FNPDATIWTAK	28.81	6570	23
101_130_BN024.wiff	Library Peptides	Shank1	FNPDATIWTAK	FNPDATIWTAK	28.92	12233	24
101_130_BN025.wiff	Library Peptides	Shank1	FNPDATIWTAK	FNPDATIWTAK	28.89	17842	25
101_130_BN026.wiff	Library Peptides	Shank1	FNPDATIWTAK	FNPDATIWTAK	31.18	26127	26
101_130_BN027.wiff	Library Peptides	Shank1	FNPDATIWTAK	FNPDATIWTAK	30.15	71541	27
101_130_BN028.wiff	Library Peptides	Shank1	FNPDATIWTAK	FNPDATIWTAK	28.94	74747	28
101_130_BN029.wiff	Library Peptides	Shank1	FNPDATIWTAK	FNPDATIWTAK	28.77	34232	29
101_130_BN030.wiff	Library Peptides	Shank1	FNPDATIWTAK	FNPDATIWTAK	28.45	30040	30
101_130_BN001.wiff	Library Peptides	Cdc42bpa serine/threonine-protein kinase MRCK alpha	FQFPAQVTDVSENAK	FQFPAQVTDVSENAK	29.86	195	1
101_130_BN002.wiff	Library Peptides	Cdc42bpa serine/threonine-protein kinase MRCK alpha	FQFPAQVTDVSENAK	FQFPAQVTDVSENAK	30.2	1370	2
101_130_BN003.wiff	Library Peptides	Cdc42bpa serine/threonine-protein kinase MRCK alpha	FQFPAQVTDVSENAK	FQFPAQVTDVSENAK	29.59	4506	3
101_130_BN004.wiff	Library Peptides	Cdc42bpa serine/threonine-protein kinase MRCK alpha	FQFPAQVTDVSENAK	FQFPAQVTDVSENAK	29.44	3399	4
101_130_BN005.wiff	Library Peptides	Cdc42bpa serine/threonine-protein kinase MRCK alpha	FQFPAQVTDVSENAK	FQFPAQVTDVSENAK	29.58	2360	5
101_130_BN006.wiff	Library Peptides	Cdc42bpa serine/threonine-protein kinase MRCK alpha	FQFPAQVTDVSENAK	FQFPAQVTDVSENAK	29.75	1892	6
101_130_BN007.wiff	Library Peptides	Cdc42bpa serine/threonine-protein kinase MRCK alpha	FQFPAQVTDVSENAK	FQFPAQVTDVSENAK	29.68	1778	7
101_130_BN008.wiff	Library Peptides	Cdc42bpa serine/threonine-protein kinase MRCK alpha	FQFPAQVTDVSENAK	FQFPAQVTDVSENAK	29.36	3294	8
101_130_BN009.wiff	Library Peptides	Cdc42bpa serine/threonine-protein kinase MRCK alpha	FQFPAQVTDVSENAK	FQFPAQVTDVSENAK	29.57	2449	9
101_130_BN010.wiff	Library Peptides	Cdc42bpa serine/threonine-protein kinase MRCK alpha	FQFPAQVTDVSENAK	FQFPAQVTDVSENAK	29.91	2127	10
101_130_BN011.wiff	Library Peptides	Cdc42bpa serine/threonine-protein kinase MRCK alpha	FQFPAQVTDVSENAK	FQFPAQVTDVSENAK	29.57	3181	11
101_130_BN012.wiff	Library Peptides	Cdc42bpa serine/threonine-protein kinase MRCK alpha	FQFPAQVTDVSENAK	FQFPAQVTDVSENAK	29.29	2624	12
101_130_BN013.wiff	Library Peptides	Cdc42bpa serine/threonine-protein kinase MRCK alpha	FQFPAQVTDVSENAK	FQFPAQVTDVSENAK	29.51	2666	13
101_130_BN014.wiff	Library Peptides	Cdc42bpa serine/threonine-protein kinase MRCK alpha	FQFPAQVTDVSENAK	FQFPAQVTDVSENAK	29.52	3172	14
101_130_BN015.wiff	Library Peptides	Cdc42bpa serine/threonine-protein kinase MRCK alpha	FQFPAQVTDVSENAK	FQFPAQVTDVSENAK	29.36	1851	15
101_130_BN016.wiff	Library Peptides	Cdc42bpa serine/threonine-protein kinase MRCK alpha	FQFPAQVTDVSENAK	FQFPAQVTDVSENAK	29.52	2254	16
101_130_BN017.wiff	Library Peptides	Cdc42bpa serine/threonine-protein kinase MRCK alpha	FQFPAQVTDVSENAK	FQFPAQVTDVSENAK	29.55	3668	17
101_130_BN018.wiff	Library Peptides	Cdc42bpa serine/threonine-protein kinase MRCK alpha	FQFPAQVTDVSENAK	FQFPAQVTDVSENAK	29.54	4954	18
101_130_BN019.wiff	Library Peptides	Cdc42bpa serine/threonine-protein kinase MRCK alpha	FQFPAQVTDVSENAK	FQFPAQVTDVSENAK	29.68	5332	19
101_130_BN020.wiff	Library Peptides	Cdc42bpa serine/threonine-protein kinase MRCK alpha	FQFPAQVTDVSENAK	FQFPAQVTDVSENAK	29.45	4172	20
101_130_BN021.wiff	Library Peptides	Cdc42bpa serine/threonine-protein kinase MRCK alpha	FQFPAQVTDVSENAK	FQFPAQVTDVSENAK	29.43	4255	21
101_130_BN022.wiff	Library Peptides	Cdc42bpa serine/threonine-protein kinase MRCK alpha	FQFPAQVTDVSENAK	FQFPAQVTDVSENAK	29.27	6333	22
101_130_BN023.wiff	Library Peptides	Cdc42bpa serine/threonine-protein kinase MRCK alpha	FQFPAQVTDVSENAK	FQFPAQVTDVSENAK	29.3	12629	23
101_130_BN024.wiff	Library Peptides	Cdc42bpa serine/threonine-protein kinase MRCK alpha	FQFPAQVTDVSENAK	FQFPAQVTDVSENAK	29.37	23849	24
101_130_BN025.wiff	Library Peptides	Cdc42bpa serine/threonine-protein kinase MRCK alpha	FQFPAQVTDVSENAK	FQFPAQVTDVSENAK	29.42	32296	25
101_130_BN026.wiff	Library Peptides	Cdc42bpa serine/threonine-protein kinase MRCK alpha	FQFPAQVTDVSENAK	FQFPAQVTDVSENAK	31.12	55720	26
101_130_BN027.wiff	Library Peptides	Cdc42bpa serine/threonine-protein kinase MRCK alpha	FQFPAQVTDVSENAK	FQFPAQVTDVSENAK	30.3	68449	27
101_130_BN028.wiff	Library Peptides	Cdc42bpa serine/threonine-protein kinase MRCK alpha	FQFPAQVTDVSENAK	FQFPAQVTDVSENAK	29.38	79308	28
101_130_BN029.wiff	Library Peptides	Cdc42bpa serine/threonine-protein kinase MRCK alpha	FQFPAQVTDVSENAK	FQFPAQVTDVSENAK	29.25	33618	29
101_130_BN030.wiff	Library Peptides	Cdc42bpa serine/threonine-protein kinase MRCK alpha	FQFPAQVTDVSENAK	FQFPAQVTDVSENAK	29.02	28598	30
101_130_BN001.wiff	Library Peptides	Camk2b	FTDEYQLYEDIGK	FTDEYQLYEDIGK	31.41	1346	1
101_130_BN002.wiff	Library Peptides	Camk2b	FTDEYQLYEDIGK	FTDEYQLYEDIGK	31.68	1037	2
101_130_BN003.wiff	Library Peptides	Camk2b	FTDEYQLYEDIGK	FTDEYQLYEDIGK	30.64	3552	3
101_130_BN004.wiff	Library Peptides	Camk2b	FTDEYQLYEDIGK	FTDEYQLYEDIGK	30.4	6390	4
101_130_BN005.wiff	Library Peptides	Camk2b	FTDEYQLYEDIGK	FTDEYQLYEDIGK	30.46	4715	5
101_130_BN006.wiff	Library Peptides	Camk2b	FTDEYQLYEDIGK	FTDEYQLYEDIGK	30.59	908	6
101_130_BN007.wiff	Library Peptides	Camk2b	FTDEYQLYEDIGK	FTDEYQLYEDIGK	29.78	9492	7
101_130_BN008.wiff	Library Peptides	Camk2b	FTDEYQLYEDIGK	FTDEYQLYEDIGK	30.44	5265	8
101_130_BN009.wiff	Library Peptides	Camk2b	FTDEYQLYEDIGK	FTDEYQLYEDIGK	30.26	3023	9
101_130_BN010.wiff	Library Peptides	Camk2b	FTDEYQLYEDIGK	FTDEYQLYEDIGK	29.79	5071	10
101_130_BN011.wiff	Library Peptides	Camk2b	FTDEYQLYEDIGK	FTDEYQLYEDIGK	30.26	1787	11
101_130_BN012.wiff	Library Peptides	Camk2b	FTDEYQLYEDIGK	FTDEYQLYEDIGK	30.23	2872	12
101_130_BN013.wiff	Library Peptides	Camk2b	FTDEYQLYEDIGK	FTDEYQLYEDIGK	30.2	2457	13
101_130_BN014.wiff	Library Peptides	Camk2b	FTDEYQLYEDIGK	FTDEYQLYEDIGK	30.18	5996	14
101_130_BN015.wiff	Library Peptides	Camk2b	FTDEYQLYEDIGK	FTDEYQLYEDIGK	30.31	2850	15
101_130_BN016.wiff	Library Peptides	Camk2b	FTDEYQLYEDIGK	FTDEYQLYEDIGK	30.08	4478	16
101_130_BN017.wiff	Library Peptides	Camk2b	FTDEYQLYEDIGK	FTDEYQLYEDIGK	30.46	5653	17
101_130_BN018.wiff	Library Peptides	Camk2b	FTDEYQLYEDIGK	FTDEYQLYEDIGK	30.53	3207	18
101_130_BN019.wiff	Library Peptides	Camk2b	FTDEYQLYEDIGK	FTDEYQLYEDIGK	30.74	3265	19
101_130_BN020.wiff	Library Peptides	Camk2b	FTDEYQLYEDIGK	FTDEYQLYEDIGK	30.41	4019	20
101_130_BN021.wiff	Library Peptides	Camk2b	FTDEYQLYEDIGK	FTDEYQLYEDIGK	30.6	3123	21
101_130_BN022.wiff	Library Peptides	Camk2b	FTDEYQLYEDIGK	FTDEYQLYEDIGK	30.42	7250	22
101_130_BN023.wiff	Library Peptides	Camk2b	FTDEYQLYEDIGK	FTDEYQLYEDIGK	30.41	5446	23
101_130_BN024.wiff	Library Peptides	Camk2b	FTDEYQLYEDIGK	FTDEYQLYEDIGK	30.55	9968	24
101_130_BN025.wiff	Library Peptides	Camk2b	FTDEYQLYEDIGK	FTDEYQLYEDIGK	30.72	12541	25
101_130_BN026.wiff	Library Peptides	Camk2b	FTDEYQLYEDIGK	FTDEYQLYEDIGK	32.68	4991	26
101_130_BN027.wiff	Library Peptides	Camk2b	FTDEYQLYEDIGK	FTDEYQLYEDIGK	32.2	4397	27
101_130_BN028.wiff	Library Peptides	Camk2b	FTDEYQLYEDIGK	FTDEYQLYEDIGK	30.76	64012	28
101_130_BN029.wiff	Library Peptides	Camk2b	FTDEYQLYEDIGK	FTDEYQLYEDIGK	30.59	57089	29
101_130_BN030.wiff	Library Peptides	Camk2b	FTDEYQLYEDIGK	FTDEYQLYEDIGK	30.23	67002	30
101_130_BN001.wiff	Library Peptides	Camk2a	FTEEYQLFEELGK	FTEEYQLFEELGK	36.68	29237	1
101_130_BN002.wiff	Library Peptides	Camk2a	FTEEYQLFEELGK	FTEEYQLFEELGK	36.33	25941	2
101_130_BN003.wiff	Library Peptides	Camk2a	FTEEYQLFEELGK	FTEEYQLFEELGK	35.48	16159	3
101_130_BN004.wiff	Library Peptides	Camk2a	FTEEYQLFEELGK	FTEEYQLFEELGK	35.35	92672	4
101_130_BN005.wiff	Library Peptides	Camk2a	FTEEYQLFEELGK	FTEEYQLFEELGK	35.47	68100	5
101_130_BN006.wiff	Library Peptides	Camk2a	FTEEYQLFEELGK	FTEEYQLFEELGK	35.26	35776	6
101_130_BN007.wiff	Library Peptides	Camk2a	FTEEYQLFEELGK	FTEEYQLFEELGK	35.18	3773	7
101_130_BN008.wiff	Library Peptides	Camk2a	FTEEYQLFEELGK	FTEEYQLFEELGK	35.19	13530	8
101_130_BN009.wiff	Library Peptides	Camk2a	FTEEYQLFEELGK	FTEEYQLFEELGK	35.11	50914	9
101_130_BN010.wiff	Library Peptides	Camk2a	FTEEYQLFEELGK	FTEEYQLFEELGK	35.21	37159	10
101_130_BN011.wiff	Library Peptides	Camk2a	FTEEYQLFEELGK	FTEEYQLFEELGK	34.47	6672	11
101_130_BN012.wiff	Library Peptides	Camk2a	FTEEYQLFEELGK	FTEEYQLFEELGK	35.2	22094	12
101_130_BN013.wiff	Library Peptides	Camk2a	FTEEYQLFEELGK	FTEEYQLFEELGK	35.79	2364	13
101_130_BN014.wiff	Library Peptides	Camk2a	FTEEYQLFEELGK	FTEEYQLFEELGK	35.03	35975	14
101_130_BN015.wiff	Library Peptides	Camk2a	FTEEYQLFEELGK	FTEEYQLFEELGK	35.21	15587	15
101_130_BN016.wiff	Library Peptides	Camk2a	FTEEYQLFEELGK	FTEEYQLFEELGK	35.27	43580	16
101_130_BN017.wiff	Library Peptides	Camk2a	FTEEYQLFEELGK	FTEEYQLFEELGK	35.73	9377	17
101_130_BN018.wiff	Library Peptides	Camk2a	FTEEYQLFEELGK	FTEEYQLFEELGK	35.44	19119	18
101_130_BN019.wiff	Library Peptides	Camk2a	FTEEYQLFEELGK	FTEEYQLFEELGK	35.52	65374	19
101_130_BN020.wiff	Library Peptides	Camk2a	FTEEYQLFEELGK	FTEEYQLFEELGK	35.3	18177	20
101_130_BN021.wiff	Library Peptides	Camk2a	FTEEYQLFEELGK	FTEEYQLFEELGK	35.89	2838	21
101_130_BN022.wiff	Library Peptides	Camk2a	FTEEYQLFEELGK	FTEEYQLFEELGK	36.01	3190	22
101_130_BN023.wiff	Library Peptides	Camk2a	FTEEYQLFEELGK	FTEEYQLFEELGK	35.43	22637	23
101_130_BN024.wiff	Library Peptides	Camk2a	FTEEYQLFEELGK	FTEEYQLFEELGK	35.92	77147	24
101_130_BN025.wiff	Library Peptides	Camk2a	FTEEYQLFEELGK	FTEEYQLFEELGK	36.21	76933	25
101_130_BN026.wiff	Library Peptides	Camk2a	FTEEYQLFEELGK	FTEEYQLFEELGK	38.84	3483	26
101_130_BN027.wiff	Library Peptides	Camk2a	FTEEYQLFEELGK	FTEEYQLFEELGK	38.81	15059	27
101_130_BN028.wiff	Library Peptides	Camk2a	FTEEYQLFEELGK	FTEEYQLFEELGK	36.25	31408	28
101_130_BN029.wiff	Library Peptides	Camk2a	FTEEYQLFEELGK	FTEEYQLFEELGK	35.98	38454	29
101_130_BN030.wiff	Library Peptides	Camk2a	FTEEYQLFEELGK	FTEEYQLFEELGK	35.59	62554	30
101_130_BN001.wiff	Library Peptides	Camk2b	FYFENLLAK	FYFENLLAK	38.1	1005	1
101_130_BN002.wiff	Library Peptides	Camk2b	FYFENLLAK	FYFENLLAK	38.26	1162	2
101_130_BN003.wiff	Library Peptides	Camk2b	FYFENLLAK	FYFENLLAK	37.08	875	3
101_130_BN004.wiff	Library Peptides	Camk2b	FYFENLLAK	FYFENLLAK	36.86	500	4
101_130_BN005.wiff	Library Peptides	Camk2b	FYFENLLAK	FYFENLLAK	37.43	653	5
101_130_BN006.wiff	Library Peptides	Camk2b	FYFENLLAK	FYFENLLAK	36.56	3456	6
101_130_BN007.wiff	Library Peptides	Camk2b	FYFENLLAK	FYFENLLAK	36.62	3441	7
101_130_BN008.wiff	Library Peptides	Camk2b	FYFENLLAK	FYFENLLAK	36.39	3977	8
101_130_BN009.wiff	Library Peptides	Camk2b	FYFENLLAK	FYFENLLAK	36.63	3471	9
101_130_BN010.wiff	Library Peptides	Camk2b	FYFENLLAK	FYFENLLAK	36.79	3214	10
101_130_BN011.wiff	Library Peptides	Camk2b	FYFENLLAK	FYFENLLAK	36.42	2909	11
101_130_BN012.wiff	Library Peptides	Camk2b	FYFENLLAK	FYFENLLAK	36.88	2902	12
101_130_BN013.wiff	Library Peptides	Camk2b	FYFENLLAK	FYFENLLAK	36.85	3042	13
101_130_BN014.wiff	Library Peptides	Camk2b	FYFENLLAK	FYFENLLAK	36.41	2204	14
101_130_BN015.wiff	Library Peptides	Camk2b	FYFENLLAK	FYFENLLAK	36.72	3148	15
101_130_BN016.wiff	Library Peptides	Camk2b	FYFENLLAK	FYFENLLAK	36.33	3206	16
101_130_BN017.wiff	Library Peptides	Camk2b	FYFENLLAK	FYFENLLAK	36.75	1509	17
101_130_BN018.wiff	Library Peptides	Camk2b	FYFENLLAK	FYFENLLAK	36.89	1659	18
101_130_BN019.wiff	Library Peptides	Camk2b	FYFENLLAK	FYFENLLAK	37.04	2937	19
101_130_BN020.wiff	Library Peptides	Camk2b	FYFENLLAK	FYFENLLAK	37	7124	20
101_130_BN021.wiff	Library Peptides	Camk2b	FYFENLLAK	FYFENLLAK	36.76	3266	21
101_130_BN022.wiff	Library Peptides	Camk2b	FYFENLLAK	FYFENLLAK	36.8	3878	22
101_130_BN023.wiff	Library Peptides	Camk2b	FYFENLLAK	FYFENLLAK	36.93	5444	23
101_130_BN024.wiff	Library Peptides	Camk2b	FYFENLLAK	FYFENLLAK	37.46	3704	24
101_130_BN025.wiff	Library Peptides	Camk2b	FYFENLLAK	FYFENLLAK	37.71	2184	25
101_130_BN026.wiff	Library Peptides	Camk2b	FYFENLLAK	FYFENLLAK	39.67	6629	26
101_130_BN027.wiff	Library Peptides	Camk2b	FYFENLLAK	FYFENLLAK	39.15	7432	27
101_130_BN028.wiff	Library Peptides	Camk2b	FYFENLLAK	FYFENLLAK	37.13	118149	28
101_130_BN029.wiff	Library Peptides	Camk2b	FYFENLLAK	FYFENLLAK	36.8	86762	29
101_130_BN030.wiff	Library Peptides	Camk2b	FYFENLLAK	FYFENLLAK	36.28	106954	30
101_130_BN001.wiff	Library Peptides	Ppp3cb	GLTPTGMLPSGVLAGGR	GLTPTGM[+16]LPSGVLAGGR	28.85	983	1
101_130_BN002.wiff	Library Peptides	Ppp3cb	GLTPTGMLPSGVLAGGR	GLTPTGM[+16]LPSGVLAGGR	29.05	1657	2
101_130_BN003.wiff	Library Peptides	Ppp3cb	GLTPTGMLPSGVLAGGR	GLTPTGM[+16]LPSGVLAGGR	28.73	4346	3
101_130_BN004.wiff	Library Peptides	Ppp3cb	GLTPTGMLPSGVLAGGR	GLTPTGM[+16]LPSGVLAGGR	28.53	11096	4
101_130_BN005.wiff	Library Peptides	Ppp3cb	GLTPTGMLPSGVLAGGR	GLTPTGM[+16]LPSGVLAGGR	28.44	17907	5
101_130_BN006.wiff	Library Peptides	Ppp3cb	GLTPTGMLPSGVLAGGR	GLTPTGM[+16]LPSGVLAGGR	28.4	29052	6
101_130_BN007.wiff	Library Peptides	Ppp3cb	GLTPTGMLPSGVLAGGR	GLTPTGM[+16]LPSGVLAGGR	28.29	88876	7
101_130_BN008.wiff	Library Peptides	Ppp3cb	GLTPTGMLPSGVLAGGR	GLTPTGM[+16]LPSGVLAGGR	28.27	390306	8
101_130_BN009.wiff	Library Peptides	Ppp3cb	GLTPTGMLPSGVLAGGR	GLTPTGM[+16]LPSGVLAGGR	28.22	290884	9
101_130_BN010.wiff	Library Peptides	Ppp3cb	GLTPTGMLPSGVLAGGR	GLTPTGM[+16]LPSGVLAGGR	28.28	190328	10
101_130_BN011.wiff	Library Peptides	Ppp3cb	GLTPTGMLPSGVLAGGR	GLTPTGM[+16]LPSGVLAGGR	28.28	94558	11
101_130_BN012.wiff	Library Peptides	Ppp3cb	GLTPTGMLPSGVLAGGR	GLTPTGM[+16]LPSGVLAGGR	28.24	60702	12
101_130_BN013.wiff	Library Peptides	Ppp3cb	GLTPTGMLPSGVLAGGR	GLTPTGM[+16]LPSGVLAGGR	28.25	83643	13
101_130_BN014.wiff	Library Peptides	Ppp3cb	GLTPTGMLPSGVLAGGR	GLTPTGM[+16]LPSGVLAGGR	28.2	95231	14
101_130_BN015.wiff	Library Peptides	Ppp3cb	GLTPTGMLPSGVLAGGR	GLTPTGM[+16]LPSGVLAGGR	28.31	64117	15
101_130_BN016.wiff	Library Peptides	Ppp3cb	GLTPTGMLPSGVLAGGR	GLTPTGM[+16]LPSGVLAGGR	28.26	69056	16
101_130_BN017.wiff	Library Peptides	Ppp3cb	GLTPTGMLPSGVLAGGR	GLTPTGM[+16]LPSGVLAGGR	28.46	71337	17
101_130_BN018.wiff	Library Peptides	Ppp3cb	GLTPTGMLPSGVLAGGR	GLTPTGM[+16]LPSGVLAGGR	28.49	86251	18
101_130_BN019.wiff	Library Peptides	Ppp3cb	GLTPTGMLPSGVLAGGR	GLTPTGM[+16]LPSGVLAGGR	28.55	73674	19
101_130_BN020.wiff	Library Peptides	Ppp3cb	GLTPTGMLPSGVLAGGR	GLTPTGM[+16]LPSGVLAGGR	28.41	123349	20
101_130_BN021.wiff	Library Peptides	Ppp3cb	GLTPTGMLPSGVLAGGR	GLTPTGM[+16]LPSGVLAGGR	28.33	280091	21
101_130_BN022.wiff	Library Peptides	Ppp3cb	GLTPTGMLPSGVLAGGR	GLTPTGM[+16]LPSGVLAGGR	28.42	266121	22
101_130_BN023.wiff	Library Peptides	Ppp3cb	GLTPTGMLPSGVLAGGR	GLTPTGM[+16]LPSGVLAGGR	28.44	187408	23
101_130_BN024.wiff	Library Peptides	Ppp3cb	GLTPTGMLPSGVLAGGR	GLTPTGM[+16]LPSGVLAGGR	28.51	176392	24
101_130_BN025.wiff	Library Peptides	Ppp3cb	GLTPTGMLPSGVLAGGR	GLTPTGM[+16]LPSGVLAGGR	28.59	170973	25
101_130_BN026.wiff	Library Peptides	Ppp3cb	GLTPTGMLPSGVLAGGR	GLTPTGM[+16]LPSGVLAGGR	30.04	132481	26
101_130_BN027.wiff	Library Peptides	Ppp3cb	GLTPTGMLPSGVLAGGR	GLTPTGM[+16]LPSGVLAGGR	29.58	90761	27
101_130_BN028.wiff	Library Peptides	Ppp3cb	GLTPTGMLPSGVLAGGR	GLTPTGM[+16]LPSGVLAGGR	28.56	78926	28
101_130_BN029.wiff	Library Peptides	Ppp3cb	GLTPTGMLPSGVLAGGR	GLTPTGM[+16]LPSGVLAGGR	28.5	38216	29
101_130_BN030.wiff	Library Peptides	Ppp3cb	GLTPTGMLPSGVLAGGR	GLTPTGM[+16]LPSGVLAGGR	28.18	68720	30
101_130_BN001.wiff	Library Peptides	Ppp3ca	GLTPTGMLPSGVLSGGK	GLTPTGM[+16]LPSGVLSGGK	27.28	3658	1
101_130_BN002.wiff	Library Peptides	Ppp3ca	GLTPTGMLPSGVLSGGK	GLTPTGM[+16]LPSGVLSGGK	28.13	6962	2
101_130_BN003.wiff	Library Peptides	Ppp3ca	GLTPTGMLPSGVLSGGK	GLTPTGM[+16]LPSGVLSGGK	28.1	14450	3
101_130_BN004.wiff	Library Peptides	Ppp3ca	GLTPTGMLPSGVLSGGK	GLTPTGM[+16]LPSGVLSGGK	27.95	47589	4
101_130_BN005.wiff	Library Peptides	Ppp3ca	GLTPTGMLPSGVLSGGK	GLTPTGM[+16]LPSGVLSGGK	28	225045	5
101_130_BN006.wiff	Library Peptides	Ppp3ca	GLTPTGMLPSGVLSGGK	GLTPTGM[+16]LPSGVLSGGK	27.94	394366	6
101_130_BN007.wiff	Library Peptides	Ppp3ca	GLTPTGMLPSGVLSGGK	GLTPTGM[+16]LPSGVLSGGK	27.85	1693499	7
101_130_BN008.wiff	Library Peptides	Ppp3ca	GLTPTGMLPSGVLSGGK	GLTPTGM[+16]LPSGVLSGGK	27.77	8592835	8
101_130_BN009.wiff	Library Peptides	Ppp3ca	GLTPTGMLPSGVLSGGK	GLTPTGM[+16]LPSGVLSGGK	27.69	10018897	9
101_130_BN010.wiff	Library Peptides	Ppp3ca	GLTPTGMLPSGVLSGGK	GLTPTGM[+16]LPSGVLSGGK	27.78	6536244	10
101_130_BN011.wiff	Library Peptides	Ppp3ca	GLTPTGMLPSGVLSGGK	GLTPTGM[+16]LPSGVLSGGK	27.79	1949843	11
101_130_BN012.wiff	Library Peptides	Ppp3ca	GLTPTGMLPSGVLSGGK	GLTPTGM[+16]LPSGVLSGGK	27.79	928572	12
101_130_BN013.wiff	Library Peptides	Ppp3ca	GLTPTGMLPSGVLSGGK	GLTPTGM[+16]LPSGVLSGGK	27.8	1078648	13
101_130_BN014.wiff	Library Peptides	Ppp3ca	GLTPTGMLPSGVLSGGK	GLTPTGM[+16]LPSGVLSGGK	27.74	1030038	14
101_130_BN015.wiff	Library Peptides	Ppp3ca	GLTPTGMLPSGVLSGGK	GLTPTGM[+16]LPSGVLSGGK	27.85	842507	15
101_130_BN016.wiff	Library Peptides	Ppp3ca	GLTPTGMLPSGVLSGGK	GLTPTGM[+16]LPSGVLSGGK	27.84	816460	16
101_130_BN017.wiff	Library Peptides	Ppp3ca	GLTPTGMLPSGVLSGGK	GLTPTGM[+16]LPSGVLSGGK	28.03	865640	17
101_130_BN018.wiff	Library Peptides	Ppp3ca	GLTPTGMLPSGVLSGGK	GLTPTGM[+16]LPSGVLSGGK	28.03	933175	18
101_130_BN019.wiff	Library Peptides	Ppp3ca	GLTPTGMLPSGVLSGGK	GLTPTGM[+16]LPSGVLSGGK	28.12	581024	19
101_130_BN020.wiff	Library Peptides	Ppp3ca	GLTPTGMLPSGVLSGGK	GLTPTGM[+16]LPSGVLSGGK	27.97	1306826	20
101_130_BN021.wiff	Library Peptides	Ppp3ca	GLTPTGMLPSGVLSGGK	GLTPTGM[+16]LPSGVLSGGK	27.89	3007229	21
101_130_BN022.wiff	Library Peptides	Ppp3ca	GLTPTGMLPSGVLSGGK	GLTPTGM[+16]LPSGVLSGGK	27.94	2593887	22
101_130_BN023.wiff	Library Peptides	Ppp3ca	GLTPTGMLPSGVLSGGK	GLTPTGM[+16]LPSGVLSGGK	27.98	1815869	23
101_130_BN024.wiff	Library Peptides	Ppp3ca	GLTPTGMLPSGVLSGGK	GLTPTGM[+16]LPSGVLSGGK	28.06	1703271	24
101_130_BN025.wiff	Library Peptides	Ppp3ca	GLTPTGMLPSGVLSGGK	GLTPTGM[+16]LPSGVLSGGK	28.08	1264602	25
101_130_BN026.wiff	Library Peptides	Ppp3ca	GLTPTGMLPSGVLSGGK	GLTPTGM[+16]LPSGVLSGGK	29.3	1204059	26
101_130_BN027.wiff	Library Peptides	Ppp3ca	GLTPTGMLPSGVLSGGK	GLTPTGM[+16]LPSGVLSGGK	28.77	777503	27
101_130_BN028.wiff	Library Peptides	Ppp3ca	GLTPTGMLPSGVLSGGK	GLTPTGM[+16]LPSGVLSGGK	28.09	604133	28
101_130_BN029.wiff	Library Peptides	Ppp3ca	GLTPTGMLPSGVLSGGK	GLTPTGM[+16]LPSGVLSGGK	27.96	182975	29
101_130_BN030.wiff	Library Peptides	Ppp3ca	GLTPTGMLPSGVLSGGK	GLTPTGM[+16]LPSGVLSGGK	27.69	204987	30
101_130_BN001.wiff	Library Peptides	Shisa6	GTLPLNVIQMSQQKPLPR	GTLPLNVIQM[+16]SQQKPLPR	27.93	559	1
101_130_BN002.wiff	Library Peptides	Shisa6	GTLPLNVIQMSQQKPLPR	GTLPLNVIQM[+16]SQQKPLPR	28.2	1658	2
101_130_BN003.wiff	Library Peptides	Shisa6	GTLPLNVIQMSQQKPLPR	GTLPLNVIQM[+16]SQQKPLPR	27.7	3039	3
101_130_BN004.wiff	Library Peptides	Shisa6	GTLPLNVIQMSQQKPLPR	GTLPLNVIQM[+16]SQQKPLPR	27.54	6411	4
101_130_BN005.wiff	Library Peptides	Shisa6	GTLPLNVIQMSQQKPLPR	GTLPLNVIQM[+16]SQQKPLPR	27.57	3609	5
101_130_BN006.wiff	Library Peptides	Shisa6	GTLPLNVIQMSQQKPLPR	GTLPLNVIQM[+16]SQQKPLPR	27.51	3356	6
101_130_BN007.wiff	Library Peptides	Shisa6	GTLPLNVIQMSQQKPLPR	GTLPLNVIQM[+16]SQQKPLPR	27.44	3124	7
101_130_BN008.wiff	Library Peptides	Shisa6	GTLPLNVIQMSQQKPLPR	GTLPLNVIQM[+16]SQQKPLPR	27.46	2467	8
101_130_BN009.wiff	Library Peptides	Shisa6	GTLPLNVIQMSQQKPLPR	GTLPLNVIQM[+16]SQQKPLPR	27.39	8107	9
101_130_BN010.wiff	Library Peptides	Shisa6	GTLPLNVIQMSQQKPLPR	GTLPLNVIQM[+16]SQQKPLPR	27.41	8551	10
101_130_BN011.wiff	Library Peptides	Shisa6	GTLPLNVIQMSQQKPLPR	GTLPLNVIQM[+16]SQQKPLPR	27.35	2381	11
101_130_BN012.wiff	Library Peptides	Shisa6	GTLPLNVIQMSQQKPLPR	GTLPLNVIQM[+16]SQQKPLPR	27.41	4438	12
101_130_BN013.wiff	Library Peptides	Shisa6	GTLPLNVIQMSQQKPLPR	GTLPLNVIQM[+16]SQQKPLPR	27.4	3181	13
101_130_BN014.wiff	Library Peptides	Shisa6	GTLPLNVIQMSQQKPLPR	GTLPLNVIQM[+16]SQQKPLPR	27.34	5416	14
101_130_BN015.wiff	Library Peptides	Shisa6	GTLPLNVIQMSQQKPLPR	GTLPLNVIQM[+16]SQQKPLPR	27.45	4343	15
101_130_BN016.wiff	Library Peptides	Shisa6	GTLPLNVIQMSQQKPLPR	GTLPLNVIQM[+16]SQQKPLPR	27.43	7894	16
101_130_BN017.wiff	Library Peptides	Shisa6	GTLPLNVIQMSQQKPLPR	GTLPLNVIQM[+16]SQQKPLPR	27.62	6010	17
101_130_BN018.wiff	Library Peptides	Shisa6	GTLPLNVIQMSQQKPLPR	GTLPLNVIQM[+16]SQQKPLPR	27.63	6850	18
101_130_BN019.wiff	Library Peptides	Shisa6	GTLPLNVIQMSQQKPLPR	GTLPLNVIQM[+16]SQQKPLPR	27.71	11909	19
101_130_BN020.wiff	Library Peptides	Shisa6	GTLPLNVIQMSQQKPLPR	GTLPLNVIQM[+16]SQQKPLPR	27.57	8754	20
101_130_BN021.wiff	Library Peptides	Shisa6	GTLPLNVIQMSQQKPLPR	GTLPLNVIQM[+16]SQQKPLPR	27.67	6738	21
101_130_BN022.wiff	Library Peptides	Shisa6	GTLPLNVIQMSQQKPLPR	GTLPLNVIQM[+16]SQQKPLPR	27.57	20039	22
101_130_BN023.wiff	Library Peptides	Shisa6	GTLPLNVIQMSQQKPLPR	GTLPLNVIQM[+16]SQQKPLPR	27.6	16740	23
101_130_BN024.wiff	Library Peptides	Shisa6	GTLPLNVIQMSQQKPLPR	GTLPLNVIQM[+16]SQQKPLPR	27.65	17340	24
101_130_BN025.wiff	Library Peptides	Shisa6	GTLPLNVIQMSQQKPLPR	GTLPLNVIQM[+16]SQQKPLPR	27.69	59153	25
101_130_BN026.wiff	Library Peptides	Shisa6	GTLPLNVIQMSQQKPLPR	GTLPLNVIQM[+16]SQQKPLPR	29.4	60935	26
101_130_BN027.wiff	Library Peptides	Shisa6	GTLPLNVIQMSQQKPLPR	GTLPLNVIQM[+16]SQQKPLPR	29.27	77127	27
101_130_BN028.wiff	Library Peptides	Shisa6	GTLPLNVIQMSQQKPLPR	GTLPLNVIQM[+16]SQQKPLPR	27.74	31509	28
101_130_BN029.wiff	Library Peptides	Shisa6	GTLPLNVIQMSQQKPLPR	GTLPLNVIQM[+16]SQQKPLPR	27.52	34830	29
101_130_BN030.wiff	Library Peptides	Shisa6	GTLPLNVIQMSQQKPLPR	GTLPLNVIQM[+16]SQQKPLPR	27.26	77499	30
101_130_BN001.wiff	Library Peptides	Shank2	IFLSGITEEER	IFLSGITEEER	29.83	658	1
101_130_BN002.wiff	Library Peptides	Shank2	IFLSGITEEER	IFLSGITEEER	30.03	1742	2
101_130_BN003.wiff	Library Peptides	Shank2	IFLSGITEEER	IFLSGITEEER	29.19	2166	3
101_130_BN004.wiff	Library Peptides	Shank2	IFLSGITEEER	IFLSGITEEER	29.01	2364	4
101_130_BN005.wiff	Library Peptides	Shank2	IFLSGITEEER	IFLSGITEEER	29.28	592	5
101_130_BN006.wiff	Library Peptides	Shank2	IFLSGITEEER	IFLSGITEEER	29.17	5684	6
101_130_BN007.wiff	Library Peptides	Shank2	IFLSGITEEER	IFLSGITEEER	28.99	3880	7
101_130_BN008.wiff	Library Peptides	Shank2	IFLSGITEEER	IFLSGITEEER	28.93	8004	8
101_130_BN009.wiff	Library Peptides	Shank2	IFLSGITEEER	IFLSGITEEER	28.63	3616	9
101_130_BN010.wiff	Library Peptides	Shank2	IFLSGITEEER	IFLSGITEEER	28.76	3070	10
101_130_BN011.wiff	Library Peptides	Shank2	IFLSGITEEER	IFLSGITEEER	29.02	5301	11
101_130_BN012.wiff	Library Peptides	Shank2	IFLSGITEEER	IFLSGITEEER	28.98	6597	12
101_130_BN013.wiff	Library Peptides	Shank2	IFLSGITEEER	IFLSGITEEER	28.96	4201	13
101_130_BN014.wiff	Library Peptides	Shank2	IFLSGITEEER	IFLSGITEEER	28.97	3190	14
101_130_BN015.wiff	Library Peptides	Shank2	IFLSGITEEER	IFLSGITEEER	29.32	2884	15
101_130_BN016.wiff	Library Peptides	Shank2	IFLSGITEEER	IFLSGITEEER	29.12	4385	16
101_130_BN017.wiff	Library Peptides	Shank2	IFLSGITEEER	IFLSGITEEER	29.28	5178	17
101_130_BN018.wiff	Library Peptides	Shank2	IFLSGITEEER	IFLSGITEEER	29.31	5372	18
101_130_BN019.wiff	Library Peptides	Shank2	IFLSGITEEER	IFLSGITEEER	29.58	9040	19
101_130_BN020.wiff	Library Peptides	Shank2	IFLSGITEEER	IFLSGITEEER	29.25	5684	20
101_130_BN021.wiff	Library Peptides	Shank2	IFLSGITEEER	IFLSGITEEER	29.49	7338	21
101_130_BN022.wiff	Library Peptides	Shank2	IFLSGITEEER	IFLSGITEEER	29.23	6610	22
101_130_BN023.wiff	Library Peptides	Shank2	IFLSGITEEER	IFLSGITEEER	29.27	7679	23
101_130_BN024.wiff	Library Peptides	Shank2	IFLSGITEEER	IFLSGITEEER	29.37	9317	24
101_130_BN025.wiff	Library Peptides	Shank2	IFLSGITEEER	IFLSGITEEER	29.42	28292	25
101_130_BN026.wiff	Library Peptides	Shank2	IFLSGITEEER	IFLSGITEEER	31.32	47604	26
101_130_BN027.wiff	Library Peptides	Shank2	IFLSGITEEER	IFLSGITEEER	31.22	40803	27
101_130_BN028.wiff	Library Peptides	Shank2	IFLSGITEEER	IFLSGITEEER	29.41	25751	28
101_130_BN029.wiff	Library Peptides	Shank2	IFLSGITEEER	IFLSGITEEER	29.22	19227	29
101_130_BN030.wiff	Library Peptides	Shank2	IFLSGITEEER	IFLSGITEEER	28.92	25649	30
101_130_BN001.wiff	Library Peptides	Slc9a1	IGSDPLAYEPK	IGSDPLAYEPK	23.46	4577	1
101_130_BN002.wiff	Library Peptides	Slc9a1	IGSDPLAYEPK	IGSDPLAYEPK	23.68	8169	2
101_130_BN003.wiff	Library Peptides	Slc9a1	IGSDPLAYEPK	IGSDPLAYEPK	23.7	7402	3
101_130_BN004.wiff	Library Peptides	Slc9a1	IGSDPLAYEPK	IGSDPLAYEPK	23.57	9198	4
101_130_BN005.wiff	Library Peptides	Slc9a1	IGSDPLAYEPK	IGSDPLAYEPK	23.54	1938	5
101_130_BN006.wiff	Library Peptides	Slc9a1	IGSDPLAYEPK	IGSDPLAYEPK	23.51	5195	6
101_130_BN007.wiff	Library Peptides	Slc9a1	IGSDPLAYEPK	IGSDPLAYEPK	23.46	10833	7
101_130_BN008.wiff	Library Peptides	Slc9a1	IGSDPLAYEPK	IGSDPLAYEPK	23.83	7897	8
101_130_BN009.wiff	Library Peptides	Slc9a1	IGSDPLAYEPK	IGSDPLAYEPK	23.86	5660	9
101_130_BN010.wiff	Library Peptides	Slc9a1	IGSDPLAYEPK	IGSDPLAYEPK	23.86	7453	10
101_130_BN011.wiff	Library Peptides	Slc9a1	IGSDPLAYEPK	IGSDPLAYEPK	23.88	14794	11
101_130_BN012.wiff	Library Peptides	Slc9a1	IGSDPLAYEPK	IGSDPLAYEPK	23.88	9157	12
101_130_BN013.wiff	Library Peptides	Slc9a1	IGSDPLAYEPK	IGSDPLAYEPK	23.87	16408	13
101_130_BN014.wiff	Library Peptides	Slc9a1	IGSDPLAYEPK	IGSDPLAYEPK	23.84	38072	14
101_130_BN015.wiff	Library Peptides	Slc9a1	IGSDPLAYEPK	IGSDPLAYEPK	23.9	33161	15
101_130_BN016.wiff	Library Peptides	Slc9a1	IGSDPLAYEPK	IGSDPLAYEPK	23.93	46775	16
101_130_BN017.wiff	Library Peptides	Slc9a1	IGSDPLAYEPK	IGSDPLAYEPK	24.12	107218	17
101_130_BN018.wiff	Library Peptides	Slc9a1	IGSDPLAYEPK	IGSDPLAYEPK	24.09	550225	18
101_130_BN019.wiff	Library Peptides	Slc9a1	IGSDPLAYEPK	IGSDPLAYEPK	24.14	2197056	19
101_130_BN020.wiff	Library Peptides	Slc9a1	IGSDPLAYEPK	IGSDPLAYEPK	23.99	4723455	20
101_130_BN021.wiff	Library Peptides	Slc9a1	IGSDPLAYEPK	IGSDPLAYEPK	23.94	7569077	21
101_130_BN022.wiff	Library Peptides	Slc9a1	IGSDPLAYEPK	IGSDPLAYEPK	24.02	4848733	22
101_130_BN023.wiff	Library Peptides	Slc9a1	IGSDPLAYEPK	IGSDPLAYEPK	24.04	2935344	23
101_130_BN024.wiff	Library Peptides	Slc9a1	IGSDPLAYEPK	IGSDPLAYEPK	24.09	2082090	24
101_130_BN025.wiff	Library Peptides	Slc9a1	IGSDPLAYEPK	IGSDPLAYEPK	24.16	1127758	25
101_130_BN026.wiff	Library Peptides	Slc9a1	IGSDPLAYEPK	IGSDPLAYEPK	24.65	977036	26
101_130_BN027.wiff	Library Peptides	Slc9a1	IGSDPLAYEPK	IGSDPLAYEPK	24.31	245366	27
101_130_BN028.wiff	Library Peptides	Slc9a1	IGSDPLAYEPK	IGSDPLAYEPK	24.15	165362	28
101_130_BN029.wiff	Library Peptides	Slc9a1	IGSDPLAYEPK	IGSDPLAYEPK	24.01	45290	29
101_130_BN030.wiff	Library Peptides	Slc9a1	IGSDPLAYEPK	IGSDPLAYEPK	23.82	91195	30
101_130_BN001.wiff	Library Peptides	Ppp3cb	IINEGAAILR	IINEGAAILR	25.26	2857	1
101_130_BN002.wiff	Library Peptides	Ppp3cb	IINEGAAILR	IINEGAAILR	25.16	6360	2
101_130_BN003.wiff	Library Peptides	Ppp3cb	IINEGAAILR	IINEGAAILR	25.15	5381	3
101_130_BN004.wiff	Library Peptides	Ppp3cb	IINEGAAILR	IINEGAAILR	24.93	10892	4
101_130_BN005.wiff	Library Peptides	Ppp3cb	IINEGAAILR	IINEGAAILR	24.97	16283	5
101_130_BN006.wiff	Library Peptides	Ppp3cb	IINEGAAILR	IINEGAAILR	24.88	26653	6
101_130_BN007.wiff	Library Peptides	Ppp3cb	IINEGAAILR	IINEGAAILR	24.84	81376	7
101_130_BN008.wiff	Library Peptides	Ppp3cb	IINEGAAILR	IINEGAAILR	24.77	379559	8
101_130_BN009.wiff	Library Peptides	Ppp3cb	IINEGAAILR	IINEGAAILR	24.71	280110	9
101_130_BN010.wiff	Library Peptides	Ppp3cb	IINEGAAILR	IINEGAAILR	24.74	207243	10
101_130_BN011.wiff	Library Peptides	Ppp3cb	IINEGAAILR	IINEGAAILR	24.77	100653	11
101_130_BN012.wiff	Library Peptides	Ppp3cb	IINEGAAILR	IINEGAAILR	24.76	56903	12
101_130_BN013.wiff	Library Peptides	Ppp3cb	IINEGAAILR	IINEGAAILR	24.78	71052	13
101_130_BN014.wiff	Library Peptides	Ppp3cb	IINEGAAILR	IINEGAAILR	24.7	75585	14
101_130_BN015.wiff	Library Peptides	Ppp3cb	IINEGAAILR	IINEGAAILR	24.81	47475	15
101_130_BN016.wiff	Library Peptides	Ppp3cb	IINEGAAILR	IINEGAAILR	24.81	56274	16
101_130_BN017.wiff	Library Peptides	Ppp3cb	IINEGAAILR	IINEGAAILR	25.03	66526	17
101_130_BN018.wiff	Library Peptides	Ppp3cb	IINEGAAILR	IINEGAAILR	24.98	79960	18
101_130_BN019.wiff	Library Peptides	Ppp3cb	IINEGAAILR	IINEGAAILR	25.09	60010	19
101_130_BN020.wiff	Library Peptides	Ppp3cb	IINEGAAILR	IINEGAAILR	24.97	112382	20
101_130_BN021.wiff	Library Peptides	Ppp3cb	IINEGAAILR	IINEGAAILR	24.87	250495	21
101_130_BN022.wiff	Library Peptides	Ppp3cb	IINEGAAILR	IINEGAAILR	24.98	225574	22
101_130_BN023.wiff	Library Peptides	Ppp3cb	IINEGAAILR	IINEGAAILR	24.96	174882	23
101_130_BN024.wiff	Library Peptides	Ppp3cb	IINEGAAILR	IINEGAAILR	25.04	149006	24
101_130_BN025.wiff	Library Peptides	Ppp3cb	IINEGAAILR	IINEGAAILR	25.08	106171	25
101_130_BN026.wiff	Library Peptides	Ppp3cb	IINEGAAILR	IINEGAAILR	26.16	76421	26
101_130_BN027.wiff	Library Peptides	Ppp3cb	IINEGAAILR	IINEGAAILR	25.16	59689	27
101_130_BN028.wiff	Library Peptides	Ppp3cb	IINEGAAILR	IINEGAAILR	25.09	55914	28
101_130_BN029.wiff	Library Peptides	Ppp3cb	IINEGAAILR	IINEGAAILR	24.92	22379	29
101_130_BN030.wiff	Library Peptides	Ppp3cb	IINEGAAILR	IINEGAAILR	24.65	23457	30
101_130_BN001.wiff	Library Peptides	Ppp3ca	IITEGASILR	IITEGASILR	25.52	44045	1
101_130_BN002.wiff	Library Peptides	Ppp3ca	IITEGASILR	IITEGASILR	25.83	55452	2
101_130_BN003.wiff	Library Peptides	Ppp3ca	IITEGASILR	IITEGASILR	25.84	90748	3
101_130_BN004.wiff	Library Peptides	Ppp3ca	IITEGASILR	IITEGASILR	25.64	169456	4
101_130_BN005.wiff	Library Peptides	Ppp3ca	IITEGASILR	IITEGASILR	25.68	333450	5
101_130_BN006.wiff	Library Peptides	Ppp3ca	IITEGASILR	IITEGASILR	25.59	455457	6
101_130_BN007.wiff	Library Peptides	Ppp3ca	IITEGASILR	IITEGASILR	25.53	1734888	7
101_130_BN008.wiff	Library Peptides	Ppp3ca	IITEGASILR	IITEGASILR	25.36	9519552	8
101_130_BN009.wiff	Library Peptides	Ppp3ca	IITEGASILR	IITEGASILR	25.26	10088266	9
101_130_BN010.wiff	Library Peptides	Ppp3ca	IITEGASILR	IITEGASILR	25.37	7775632	10
101_130_BN011.wiff	Library Peptides	Ppp3ca	IITEGASILR	IITEGASILR	25.43	2516257	11
101_130_BN012.wiff	Library Peptides	Ppp3ca	IITEGASILR	IITEGASILR	25.44	857859	12
101_130_BN013.wiff	Library Peptides	Ppp3ca	IITEGASILR	IITEGASILR	25.48	1036700	13
101_130_BN014.wiff	Library Peptides	Ppp3ca	IITEGASILR	IITEGASILR	25.38	969401	14
101_130_BN015.wiff	Library Peptides	Ppp3ca	IITEGASILR	IITEGASILR	25.49	674399	15
101_130_BN016.wiff	Library Peptides	Ppp3ca	IITEGASILR	IITEGASILR	25.51	852805	16
101_130_BN017.wiff	Library Peptides	Ppp3ca	IITEGASILR	IITEGASILR	25.72	860161	17
101_130_BN018.wiff	Library Peptides	Ppp3ca	IITEGASILR	IITEGASILR	25.7	857221	18
101_130_BN019.wiff	Library Peptides	Ppp3ca	IITEGASILR	IITEGASILR	25.78	570323	19
101_130_BN020.wiff	Library Peptides	Ppp3ca	IITEGASILR	IITEGASILR	25.66	1395497	20
101_130_BN021.wiff	Library Peptides	Ppp3ca	IITEGASILR	IITEGASILR	25.56	2995381	21
101_130_BN022.wiff	Library Peptides	Ppp3ca	IITEGASILR	IITEGASILR	25.64	2520653	22
101_130_BN023.wiff	Library Peptides	Ppp3ca	IITEGASILR	IITEGASILR	25.64	1886037	23
101_130_BN024.wiff	Library Peptides	Ppp3ca	IITEGASILR	IITEGASILR	25.73	1636886	24
101_130_BN025.wiff	Library Peptides	Ppp3ca	IITEGASILR	IITEGASILR	25.77	1119741	25
101_130_BN026.wiff	Library Peptides	Ppp3ca	IITEGASILR	IITEGASILR	27.34	1206069	26
101_130_BN027.wiff	Library Peptides	Ppp3ca	IITEGASILR	IITEGASILR	25.93	794178	27
101_130_BN028.wiff	Library Peptides	Ppp3ca	IITEGASILR	IITEGASILR	25.78	528043	28
101_130_BN029.wiff	Library Peptides	Ppp3ca	IITEGASILR	IITEGASILR	25.65	153747	29
101_130_BN030.wiff	Library Peptides	Ppp3ca	IITEGASILR	IITEGASILR	25.37	208305	30
101_130_BN001.wiff	Library Peptides	Shisa6	ILSDEQLLSTER	ILSDEQLLSTER	26.24	1420	1
101_130_BN002.wiff	Library Peptides	Shisa6	ILSDEQLLSTER	ILSDEQLLSTER	26.32	1459	2
101_130_BN003.wiff	Library Peptides	Shisa6	ILSDEQLLSTER	ILSDEQLLSTER	26.4	1633	3
101_130_BN004.wiff	Library Peptides	Shisa6	ILSDEQLLSTER	ILSDEQLLSTER	26.25	1552	4
101_130_BN005.wiff	Library Peptides	Shisa6	ILSDEQLLSTER	ILSDEQLLSTER	26.35	1500	5
101_130_BN006.wiff	Library Peptides	Shisa6	ILSDEQLLSTER	ILSDEQLLSTER	25.87	209	6
101_130_BN007.wiff	Library Peptides	Shisa6	ILSDEQLLSTER	ILSDEQLLSTER	25.83	1368	7
101_130_BN008.wiff	Library Peptides	Shisa6	ILSDEQLLSTER	ILSDEQLLSTER	25.85	1922	8
101_130_BN009.wiff	Library Peptides	Shisa6	ILSDEQLLSTER	ILSDEQLLSTER	26.07	742	9
101_130_BN010.wiff	Library Peptides	Shisa6	ILSDEQLLSTER	ILSDEQLLSTER	25.83	1704	10
101_130_BN011.wiff	Library Peptides	Shisa6	ILSDEQLLSTER	ILSDEQLLSTER	26.09	1244	11
101_130_BN012.wiff	Library Peptides	Shisa6	ILSDEQLLSTER	ILSDEQLLSTER	26.14	1101	12
101_130_BN013.wiff	Library Peptides	Shisa6	ILSDEQLLSTER	ILSDEQLLSTER	26.08	2630	13
101_130_BN014.wiff	Library Peptides	Shisa6	ILSDEQLLSTER	ILSDEQLLSTER	26.03	2177	14
101_130_BN015.wiff	Library Peptides	Shisa6	ILSDEQLLSTER	ILSDEQLLSTER	26.13	1758	15
101_130_BN016.wiff	Library Peptides	Shisa6	ILSDEQLLSTER	ILSDEQLLSTER	26.11	2058	16
101_130_BN017.wiff	Library Peptides	Shisa6	ILSDEQLLSTER	ILSDEQLLSTER	26.31	2593	17
101_130_BN018.wiff	Library Peptides	Shisa6	ILSDEQLLSTER	ILSDEQLLSTER	26.28	2319	18
101_130_BN019.wiff	Library Peptides	Shisa6	ILSDEQLLSTER	ILSDEQLLSTER	26.35	2423	19
101_130_BN020.wiff	Library Peptides	Shisa6	ILSDEQLLSTER	ILSDEQLLSTER	26.27	2878	20
101_130_BN021.wiff	Library Peptides	Shisa6	ILSDEQLLSTER	ILSDEQLLSTER	26.19	2228	21
101_130_BN022.wiff	Library Peptides	Shisa6	ILSDEQLLSTER	ILSDEQLLSTER	26.23	2862	22
101_130_BN023.wiff	Library Peptides	Shisa6	ILSDEQLLSTER	ILSDEQLLSTER	26.27	2000	23
101_130_BN024.wiff	Library Peptides	Shisa6	ILSDEQLLSTER	ILSDEQLLSTER	26.35	2334	24
101_130_BN025.wiff	Library Peptides	Shisa6	ILSDEQLLSTER	ILSDEQLLSTER	26.39	3960	25
101_130_BN026.wiff	Library Peptides	Shisa6	ILSDEQLLSTER	ILSDEQLLSTER	27.04	2931	26
101_130_BN027.wiff	Library Peptides	Shisa6	ILSDEQLLSTER	ILSDEQLLSTER	27.29	5634	27
101_130_BN028.wiff	Library Peptides	Shisa6	ILSDEQLLSTER	ILSDEQLLSTER	26.38	16128	28
101_130_BN029.wiff	Library Peptides	Shisa6	ILSDEQLLSTER	ILSDEQLLSTER	26.23	13960	29
101_130_BN030.wiff	Library Peptides	Shisa6	ILSDEQLLSTER	ILSDEQLLSTER	25.92	19996	30
101_130_BN001.wiff	Library Peptides		ITLEEYR	ITLEEYR	21.77	759	1
101_130_BN002.wiff	Library Peptides		ITLEEYR	ITLEEYR	22.05	1509	2
101_130_BN003.wiff	Library Peptides		ITLEEYR	ITLEEYR	21.71	2191	3
101_130_BN004.wiff	Library Peptides		ITLEEYR	ITLEEYR	21.59	3190	4
101_130_BN005.wiff	Library Peptides		ITLEEYR	ITLEEYR	21.6	2846	5
101_130_BN006.wiff	Library Peptides		ITLEEYR	ITLEEYR	21.5	4545	6
101_130_BN007.wiff	Library Peptides		ITLEEYR	ITLEEYR	21.44	11950	7
101_130_BN008.wiff	Library Peptides		ITLEEYR	ITLEEYR	21.38	14811	8
101_130_BN009.wiff	Library Peptides		ITLEEYR	ITLEEYR	21.35	5263	9
101_130_BN010.wiff	Library Peptides		ITLEEYR	ITLEEYR	21.36	7229	10
101_130_BN011.wiff	Library Peptides		ITLEEYR	ITLEEYR	21.45	4737	11
101_130_BN012.wiff	Library Peptides		ITLEEYR	ITLEEYR	21.47	2252	12
101_130_BN013.wiff	Library Peptides		ITLEEYR	ITLEEYR	21.37	5686	13
101_130_BN014.wiff	Library Peptides		ITLEEYR	ITLEEYR	21.32	10369	14
101_130_BN015.wiff	Library Peptides		ITLEEYR	ITLEEYR	21.41	8351	15
101_130_BN016.wiff	Library Peptides		ITLEEYR	ITLEEYR	21.52	11035	16
101_130_BN017.wiff	Library Peptides		ITLEEYR	ITLEEYR	21.66	22310	17
101_130_BN018.wiff	Library Peptides		ITLEEYR	ITLEEYR	21.62	99092	18
101_130_BN019.wiff	Library Peptides		ITLEEYR	ITLEEYR	21.69	399164	19
101_130_BN020.wiff	Library Peptides		ITLEEYR	ITLEEYR	21.57	758092	20
101_130_BN021.wiff	Library Peptides		ITLEEYR	ITLEEYR	21.52	1440796	21
101_130_BN022.wiff	Library Peptides		ITLEEYR	ITLEEYR	21.61	744485	22
101_130_BN023.wiff	Library Peptides		ITLEEYR	ITLEEYR	21.58	496037	23
101_130_BN024.wiff	Library Peptides		ITLEEYR	ITLEEYR	21.63	331301	24
101_130_BN025.wiff	Library Peptides		ITLEEYR	ITLEEYR	21.7	140071	25
101_130_BN026.wiff	Library Peptides		ITLEEYR	ITLEEYR	21.95	23519	26
101_130_BN027.wiff	Library Peptides		ITLEEYR	ITLEEYR	21.87	17077	27
101_130_BN028.wiff	Library Peptides		ITLEEYR	ITLEEYR	21.67	22014	28
101_130_BN029.wiff	Library Peptides		ITLEEYR	ITLEEYR	21.59	9181	29
101_130_BN030.wiff	Library Peptides		ITLEEYR	ITLEEYR	21.44	27138	30
101_130_BN001.wiff	Library Peptides	Camk2a	ITQYLDAGGIPR	ITQYLDAGGIPR	25.96	4381	1
101_130_BN002.wiff	Library Peptides	Camk2a	ITQYLDAGGIPR	ITQYLDAGGIPR	26.33	1408	2
101_130_BN003.wiff	Library Peptides	Camk2a	ITQYLDAGGIPR	ITQYLDAGGIPR	26.06	3424	3
101_130_BN004.wiff	Library Peptides	Camk2a	ITQYLDAGGIPR	ITQYLDAGGIPR	25.86	6254	4
101_130_BN005.wiff	Library Peptides	Camk2a	ITQYLDAGGIPR	ITQYLDAGGIPR	25.99	8128	5
101_130_BN006.wiff	Library Peptides	Camk2a	ITQYLDAGGIPR	ITQYLDAGGIPR	25.83	1978	6
101_130_BN007.wiff	Library Peptides	Camk2a	ITQYLDAGGIPR	ITQYLDAGGIPR	25.8	3663	7
101_130_BN008.wiff	Library Peptides	Camk2a	ITQYLDAGGIPR	ITQYLDAGGIPR	25.54	1533	8
101_130_BN009.wiff	Library Peptides	Camk2a	ITQYLDAGGIPR	ITQYLDAGGIPR	25.3	2450	9
101_130_BN010.wiff	Library Peptides	Camk2a	ITQYLDAGGIPR	ITQYLDAGGIPR	25.46	2874	10
101_130_BN011.wiff	Library Peptides	Camk2a	ITQYLDAGGIPR	ITQYLDAGGIPR	25.77	2900	11
101_130_BN012.wiff	Library Peptides	Camk2a	ITQYLDAGGIPR	ITQYLDAGGIPR	25.62	1016	12
101_130_BN013.wiff	Library Peptides	Camk2a	ITQYLDAGGIPR	ITQYLDAGGIPR	25.33	1765	13
101_130_BN014.wiff	Library Peptides	Camk2a	ITQYLDAGGIPR	ITQYLDAGGIPR	25.78	1132	14
101_130_BN015.wiff	Library Peptides	Camk2a	ITQYLDAGGIPR	ITQYLDAGGIPR	26.1	919	15
101_130_BN016.wiff	Library Peptides	Camk2a	ITQYLDAGGIPR	ITQYLDAGGIPR	25.81	1865	16
101_130_BN017.wiff	Library Peptides	Camk2a	ITQYLDAGGIPR	ITQYLDAGGIPR	25.94	2428	17
101_130_BN018.wiff	Library Peptides	Camk2a	ITQYLDAGGIPR	ITQYLDAGGIPR	26.01	4158	18
101_130_BN019.wiff	Library Peptides	Camk2a	ITQYLDAGGIPR	ITQYLDAGGIPR	25.46	2275	19
101_130_BN020.wiff	Library Peptides	Camk2a	ITQYLDAGGIPR	ITQYLDAGGIPR	26	2274	20
101_130_BN021.wiff	Library Peptides	Camk2a	ITQYLDAGGIPR	ITQYLDAGGIPR	25.56	2052	21
101_130_BN022.wiff	Library Peptides	Camk2a	ITQYLDAGGIPR	ITQYLDAGGIPR	25.76	3407	22
101_130_BN023.wiff	Library Peptides	Camk2a	ITQYLDAGGIPR	ITQYLDAGGIPR	25.68	3451	23
101_130_BN024.wiff	Library Peptides	Camk2a	ITQYLDAGGIPR	ITQYLDAGGIPR	25.42	3511	24
101_130_BN025.wiff	Library Peptides	Camk2a	ITQYLDAGGIPR	ITQYLDAGGIPR	25.51	5544	25
101_130_BN026.wiff	Library Peptides	Camk2a	ITQYLDAGGIPR	ITQYLDAGGIPR	26.93	5664	26
101_130_BN027.wiff	Library Peptides	Camk2a	ITQYLDAGGIPR	ITQYLDAGGIPR	26.86	20464	27
101_130_BN028.wiff	Library Peptides	Camk2a	ITQYLDAGGIPR	ITQYLDAGGIPR	25.81	40844	28
101_130_BN029.wiff	Library Peptides	Camk2a	ITQYLDAGGIPR	ITQYLDAGGIPR	25.66	36273	29
101_130_BN030.wiff	Library Peptides	Camk2a	ITQYLDAGGIPR	ITQYLDAGGIPR	25.46	56158	30
101_130_BN001.wiff	Library Peptides	Synapsin-1	IWQGIDIETK	IWQGIDIETK	28.89	667	1
101_130_BN002.wiff	Library Peptides	Synapsin-1	IWQGIDIETK	IWQGIDIETK	29.01	3100	2
101_130_BN003.wiff	Library Peptides	Synapsin-1	IWQGIDIETK	IWQGIDIETK	29.02	5511	3
101_130_BN004.wiff	Library Peptides	Synapsin-1	IWQGIDIETK	IWQGIDIETK	28.75	3900	4
101_130_BN005.wiff	Library Peptides	Synapsin-1	IWQGIDIETK	IWQGIDIETK	28.86	7563	5
101_130_BN006.wiff	Library Peptides	Synapsin-1	IWQGIDIETK	IWQGIDIETK	28.74	3939	6
101_130_BN007.wiff	Library Peptides	Synapsin-1	IWQGIDIETK	IWQGIDIETK	28.65	12289	7
101_130_BN008.wiff	Library Peptides	Synapsin-1	IWQGIDIETK	IWQGIDIETK	28.61	15543	8
101_130_BN009.wiff	Library Peptides	Synapsin-1	IWQGIDIETK	IWQGIDIETK	28.56	7075	9
101_130_BN010.wiff	Library Peptides	Synapsin-1	IWQGIDIETK	IWQGIDIETK	28.64	6031	10
101_130_BN011.wiff	Library Peptides	Synapsin-1	IWQGIDIETK	IWQGIDIETK	28.63	4535	11
101_130_BN012.wiff	Library Peptides	Synapsin-1	IWQGIDIETK	IWQGIDIETK	29.02	5963	12
101_130_BN013.wiff	Library Peptides	Synapsin-1	IWQGIDIETK	IWQGIDIETK	28.6	5930	13
101_130_BN014.wiff	Library Peptides	Synapsin-1	IWQGIDIETK	IWQGIDIETK	28.54	6505	14
101_130_BN015.wiff	Library Peptides	Synapsin-1	IWQGIDIETK	IWQGIDIETK	28.67	6729	15
101_130_BN016.wiff	Library Peptides	Synapsin-1	IWQGIDIETK	IWQGIDIETK	28.62	8617	16
101_130_BN017.wiff	Library Peptides	Synapsin-1	IWQGIDIETK	IWQGIDIETK	28.84	16414	17
101_130_BN018.wiff	Library Peptides	Synapsin-1	IWQGIDIETK	IWQGIDIETK	28.87	94570	18
101_130_BN019.wiff	Library Peptides	Synapsin-1	IWQGIDIETK	IWQGIDIETK	28.93	315043	19
101_130_BN020.wiff	Library Peptides	Synapsin-1	IWQGIDIETK	IWQGIDIETK	28.78	730422	20
101_130_BN021.wiff	Library Peptides	Synapsin-1	IWQGIDIETK	IWQGIDIETK	28.67	1272921	21
101_130_BN022.wiff	Library Peptides	Synapsin-1	IWQGIDIETK	IWQGIDIETK	28.76	682043	22
101_130_BN023.wiff	Library Peptides	Synapsin-1	IWQGIDIETK	IWQGIDIETK	28.8	445054	23
101_130_BN024.wiff	Library Peptides	Synapsin-1	IWQGIDIETK	IWQGIDIETK	28.89	338302	24
101_130_BN025.wiff	Library Peptides	Synapsin-1	IWQGIDIETK	IWQGIDIETK	28.95	190027	25
101_130_BN026.wiff	Library Peptides	Synapsin-1	IWQGIDIETK	IWQGIDIETK	30.87	112753	26
101_130_BN027.wiff	Library Peptides	Synapsin-1	IWQGIDIETK	IWQGIDIETK	30.03	19307	27
101_130_BN028.wiff	Library Peptides	Synapsin-1	IWQGIDIETK	IWQGIDIETK	28.94	24585	28
101_130_BN029.wiff	Library Peptides	Synapsin-1	IWQGIDIETK	IWQGIDIETK	28.77	10542	29
101_130_BN030.wiff	Library Peptides	Synapsin-1	IWQGIDIETK	IWQGIDIETK	28.13	15802	30
101_130_BN001.wiff	Library Peptides	Cacna1g	KDALSLSGLSSDPTDLDP	KDALSLSGLSSDPTDLDP	31.97	1854	1
101_130_BN002.wiff	Library Peptides	Cacna1g	KDALSLSGLSSDPTDLDP	KDALSLSGLSSDPTDLDP	31.41	561	2
101_130_BN003.wiff	Library Peptides	Cacna1g	KDALSLSGLSSDPTDLDP	KDALSLSGLSSDPTDLDP	31.38	1376	3
101_130_BN004.wiff	Library Peptides	Cacna1g	KDALSLSGLSSDPTDLDP	KDALSLSGLSSDPTDLDP	31.34	1799	4
101_130_BN005.wiff	Library Peptides	Cacna1g	KDALSLSGLSSDPTDLDP	KDALSLSGLSSDPTDLDP	31.38	1018	5
101_130_BN006.wiff	Library Peptides	Cacna1g	KDALSLSGLSSDPTDLDP	KDALSLSGLSSDPTDLDP	31.51	6015	6
101_130_BN007.wiff	Library Peptides	Cacna1g	KDALSLSGLSSDPTDLDP	KDALSLSGLSSDPTDLDP	31.42	4874	7
101_130_BN008.wiff	Library Peptides	Cacna1g	KDALSLSGLSSDPTDLDP	KDALSLSGLSSDPTDLDP	31.4	4696	8
101_130_BN009.wiff	Library Peptides	Cacna1g	KDALSLSGLSSDPTDLDP	KDALSLSGLSSDPTDLDP	31.33	4058	9
101_130_BN010.wiff	Library Peptides	Cacna1g	KDALSLSGLSSDPTDLDP	KDALSLSGLSSDPTDLDP	31.43	4249	10
101_130_BN011.wiff	Library Peptides	Cacna1g	KDALSLSGLSSDPTDLDP	KDALSLSGLSSDPTDLDP	31.41	5779	11
101_130_BN012.wiff	Library Peptides	Cacna1g	KDALSLSGLSSDPTDLDP	KDALSLSGLSSDPTDLDP	31.4	4481	12
101_130_BN013.wiff	Library Peptides	Cacna1g	KDALSLSGLSSDPTDLDP	KDALSLSGLSSDPTDLDP	31.35	3507	13
101_130_BN014.wiff	Library Peptides	Cacna1g	KDALSLSGLSSDPTDLDP	KDALSLSGLSSDPTDLDP	31.29	4374	14
101_130_BN015.wiff	Library Peptides	Cacna1g	KDALSLSGLSSDPTDLDP	KDALSLSGLSSDPTDLDP	31.46	6509	15
101_130_BN016.wiff	Library Peptides	Cacna1g	KDALSLSGLSSDPTDLDP	KDALSLSGLSSDPTDLDP	31.46	7356	16
101_130_BN017.wiff	Library Peptides	Cacna1g	KDALSLSGLSSDPTDLDP	KDALSLSGLSSDPTDLDP	31.61	6497	17
101_130_BN018.wiff	Library Peptides	Cacna1g	KDALSLSGLSSDPTDLDP	KDALSLSGLSSDPTDLDP	31.63	6891	18
101_130_BN019.wiff	Library Peptides	Cacna1g	KDALSLSGLSSDPTDLDP	KDALSLSGLSSDPTDLDP	31.71	6853	19
101_130_BN020.wiff	Library Peptides	Cacna1g	KDALSLSGLSSDPTDLDP	KDALSLSGLSSDPTDLDP	31.54	6186	20
101_130_BN021.wiff	Library Peptides	Cacna1g	KDALSLSGLSSDPTDLDP	KDALSLSGLSSDPTDLDP	31.8	15307	21
101_130_BN022.wiff	Library Peptides	Cacna1g	KDALSLSGLSSDPTDLDP	KDALSLSGLSSDPTDLDP	31.81	47553	22
101_130_BN023.wiff	Library Peptides	Cacna1g	KDALSLSGLSSDPTDLDP	KDALSLSGLSSDPTDLDP	31.82	68730	23
101_130_BN024.wiff	Library Peptides	Cacna1g	KDALSLSGLSSDPTDLDP	KDALSLSGLSSDPTDLDP	31.94	128270	24
101_130_BN025.wiff	Library Peptides	Cacna1g	KDALSLSGLSSDPTDLDP	KDALSLSGLSSDPTDLDP	31.99	171692	25
101_130_BN026.wiff	Library Peptides	Cacna1g	KDALSLSGLSSDPTDLDP	KDALSLSGLSSDPTDLDP	33.94	199125	26
101_130_BN027.wiff	Library Peptides	Cacna1g	KDALSLSGLSSDPTDLDP	KDALSLSGLSSDPTDLDP	33.27	195941	27
101_130_BN028.wiff	Library Peptides	Cacna1g	KDALSLSGLSSDPTDLDP	KDALSLSGLSSDPTDLDP	31.91	170852	28
101_130_BN029.wiff	Library Peptides	Cacna1g	KDALSLSGLSSDPTDLDP	KDALSLSGLSSDPTDLDP	31.78	50399	29
101_130_BN030.wiff	Library Peptides	Cacna1g	KDALSLSGLSSDPTDLDP	KDALSLSGLSSDPTDLDP	31.46	42536	30
101_130_BN001.wiff	Library Peptides	Ppp3r1	KLDLDNSGSLSVEEFMSLPELQQNPLVQR	KLDLDNSGSLSVEEFM[+16]SLPELQQNPLVQR	39.7	79191	1
101_130_BN002.wiff	Library Peptides	Ppp3r1	KLDLDNSGSLSVEEFMSLPELQQNPLVQR	KLDLDNSGSLSVEEFM[+16]SLPELQQNPLVQR	39.23	123533	2
101_130_BN003.wiff	Library Peptides	Ppp3r1	KLDLDNSGSLSVEEFMSLPELQQNPLVQR	KLDLDNSGSLSVEEFM[+16]SLPELQQNPLVQR	37.42	151498	3
101_130_BN004.wiff	Library Peptides	Ppp3r1	KLDLDNSGSLSVEEFMSLPELQQNPLVQR	KLDLDNSGSLSVEEFM[+16]SLPELQQNPLVQR	37.36	171102	4
101_130_BN005.wiff	Library Peptides	Ppp3r1	KLDLDNSGSLSVEEFMSLPELQQNPLVQR	KLDLDNSGSLSVEEFM[+16]SLPELQQNPLVQR	37.64	120395	5
101_130_BN006.wiff	Library Peptides	Ppp3r1	KLDLDNSGSLSVEEFMSLPELQQNPLVQR	KLDLDNSGSLSVEEFM[+16]SLPELQQNPLVQR	37.12	92690	6
101_130_BN007.wiff	Library Peptides	Ppp3r1	KLDLDNSGSLSVEEFMSLPELQQNPLVQR	KLDLDNSGSLSVEEFM[+16]SLPELQQNPLVQR	37.02	208221	7
101_130_BN008.wiff	Library Peptides	Ppp3r1	KLDLDNSGSLSVEEFMSLPELQQNPLVQR	KLDLDNSGSLSVEEFM[+16]SLPELQQNPLVQR	36.99	666135	8
101_130_BN009.wiff	Library Peptides	Ppp3r1	KLDLDNSGSLSVEEFMSLPELQQNPLVQR	KLDLDNSGSLSVEEFM[+16]SLPELQQNPLVQR	36.93	454812	9
101_130_BN010.wiff	Library Peptides	Ppp3r1	KLDLDNSGSLSVEEFMSLPELQQNPLVQR	KLDLDNSGSLSVEEFM[+16]SLPELQQNPLVQR	37.03	567945	10
101_130_BN011.wiff	Library Peptides	Ppp3r1	KLDLDNSGSLSVEEFMSLPELQQNPLVQR	KLDLDNSGSLSVEEFM[+16]SLPELQQNPLVQR	36.92	357935	11
101_130_BN012.wiff	Library Peptides	Ppp3r1	KLDLDNSGSLSVEEFMSLPELQQNPLVQR	KLDLDNSGSLSVEEFM[+16]SLPELQQNPLVQR	37.05	194415	12
101_130_BN013.wiff	Library Peptides	Ppp3r1	KLDLDNSGSLSVEEFMSLPELQQNPLVQR	KLDLDNSGSLSVEEFM[+16]SLPELQQNPLVQR	36.92	296747	13
101_130_BN014.wiff	Library Peptides	Ppp3r1	KLDLDNSGSLSVEEFMSLPELQQNPLVQR	KLDLDNSGSLSVEEFM[+16]SLPELQQNPLVQR	36.85	274629	14
101_130_BN015.wiff	Library Peptides	Ppp3r1	KLDLDNSGSLSVEEFMSLPELQQNPLVQR	KLDLDNSGSLSVEEFM[+16]SLPELQQNPLVQR	37.05	235765	15
101_130_BN016.wiff	Library Peptides	Ppp3r1	KLDLDNSGSLSVEEFMSLPELQQNPLVQR	KLDLDNSGSLSVEEFM[+16]SLPELQQNPLVQR	37.19	232470	16
101_130_BN017.wiff	Library Peptides	Ppp3r1	KLDLDNSGSLSVEEFMSLPELQQNPLVQR	KLDLDNSGSLSVEEFM[+16]SLPELQQNPLVQR	37.25	261137	17
101_130_BN018.wiff	Library Peptides	Ppp3r1	KLDLDNSGSLSVEEFMSLPELQQNPLVQR	KLDLDNSGSLSVEEFM[+16]SLPELQQNPLVQR	37.3	248685	18
101_130_BN019.wiff	Library Peptides	Ppp3r1	KLDLDNSGSLSVEEFMSLPELQQNPLVQR	KLDLDNSGSLSVEEFM[+16]SLPELQQNPLVQR	37.44	180598	19
101_130_BN020.wiff	Library Peptides	Ppp3r1	KLDLDNSGSLSVEEFMSLPELQQNPLVQR	KLDLDNSGSLSVEEFM[+16]SLPELQQNPLVQR	37.18	380145	20
101_130_BN021.wiff	Library Peptides	Ppp3r1	KLDLDNSGSLSVEEFMSLPELQQNPLVQR	KLDLDNSGSLSVEEFM[+16]SLPELQQNPLVQR	37.38	1373166	21
101_130_BN022.wiff	Library Peptides	Ppp3r1	KLDLDNSGSLSVEEFMSLPELQQNPLVQR	KLDLDNSGSLSVEEFM[+16]SLPELQQNPLVQR	37.23	1004702	22
101_130_BN023.wiff	Library Peptides	Ppp3r1	KLDLDNSGSLSVEEFMSLPELQQNPLVQR	KLDLDNSGSLSVEEFM[+16]SLPELQQNPLVQR	37.4	770748	23
101_130_BN024.wiff	Library Peptides	Ppp3r1	KLDLDNSGSLSVEEFMSLPELQQNPLVQR	KLDLDNSGSLSVEEFM[+16]SLPELQQNPLVQR	38.55	696182	24
101_130_BN025.wiff	Library Peptides	Ppp3r1	KLDLDNSGSLSVEEFMSLPELQQNPLVQR	KLDLDNSGSLSVEEFM[+16]SLPELQQNPLVQR	39.25	529422	25
101_130_BN026.wiff	Library Peptides	Ppp3r1	KLDLDNSGSLSVEEFMSLPELQQNPLVQR	KLDLDNSGSLSVEEFM[+16]SLPELQQNPLVQR	41.37	271613	26
101_130_BN027.wiff	Library Peptides	Ppp3r1	KLDLDNSGSLSVEEFMSLPELQQNPLVQR	KLDLDNSGSLSVEEFM[+16]SLPELQQNPLVQR	41.03	154805	27
101_130_BN028.wiff	Library Peptides	Ppp3r1	KLDLDNSGSLSVEEFMSLPELQQNPLVQR	KLDLDNSGSLSVEEFM[+16]SLPELQQNPLVQR	37.53	247728	28
101_130_BN029.wiff	Library Peptides	Ppp3r1	KLDLDNSGSLSVEEFMSLPELQQNPLVQR	KLDLDNSGSLSVEEFM[+16]SLPELQQNPLVQR	37.18	80354	29
101_130_BN030.wiff	Library Peptides	Ppp3r1	KLDLDNSGSLSVEEFMSLPELQQNPLVQR	KLDLDNSGSLSVEEFM[+16]SLPELQQNPLVQR	36.76	67093	30
101_130_BN001.wiff	Library Peptides	Shank2	LLDPSSPLALALSAR	LLDPSSPLALALSAR	40.25	4985	1
101_130_BN002.wiff	Library Peptides	Shank2	LLDPSSPLALALSAR	LLDPSSPLALALSAR	40.47	2797	2
101_130_BN003.wiff	Library Peptides	Shank2	LLDPSSPLALALSAR	LLDPSSPLALALSAR	39.51	3486	3
101_130_BN004.wiff	Library Peptides	Shank2	LLDPSSPLALALSAR	LLDPSSPLALALSAR	38.92	3088	4
101_130_BN005.wiff	Library Peptides	Shank2	LLDPSSPLALALSAR	LLDPSSPLALALSAR	39.34	1720	5
101_130_BN006.wiff	Library Peptides	Shank2	LLDPSSPLALALSAR	LLDPSSPLALALSAR	39	2939	6
101_130_BN007.wiff	Library Peptides	Shank2	LLDPSSPLALALSAR	LLDPSSPLALALSAR	38.82	3509	7
101_130_BN008.wiff	Library Peptides	Shank2	LLDPSSPLALALSAR	LLDPSSPLALALSAR	38.83	1199	8
101_130_BN009.wiff	Library Peptides	Shank2	LLDPSSPLALALSAR	LLDPSSPLALALSAR	38.72	1619	9
101_130_BN010.wiff	Library Peptides	Shank2	LLDPSSPLALALSAR	LLDPSSPLALALSAR	39.15	4049	10
101_130_BN011.wiff	Library Peptides	Shank2	LLDPSSPLALALSAR	LLDPSSPLALALSAR	38.6	2913	11
101_130_BN012.wiff	Library Peptides	Shank2	LLDPSSPLALALSAR	LLDPSSPLALALSAR	38.92	1200	12
101_130_BN013.wiff	Library Peptides	Shank2	LLDPSSPLALALSAR	LLDPSSPLALALSAR	38.73	7307	13
101_130_BN014.wiff	Library Peptides	Shank2	LLDPSSPLALALSAR	LLDPSSPLALALSAR	38.53	6282	14
101_130_BN015.wiff	Library Peptides	Shank2	LLDPSSPLALALSAR	LLDPSSPLALALSAR	38.79	8699	15
101_130_BN016.wiff	Library Peptides	Shank2	LLDPSSPLALALSAR	LLDPSSPLALALSAR	38.76	10728	16
101_130_BN017.wiff	Library Peptides	Shank2	LLDPSSPLALALSAR	LLDPSSPLALALSAR	39.02	14335	17
101_130_BN018.wiff	Library Peptides	Shank2	LLDPSSPLALALSAR	LLDPSSPLALALSAR	39.04	18106	18
101_130_BN019.wiff	Library Peptides	Shank2	LLDPSSPLALALSAR	LLDPSSPLALALSAR	39.17	14025	19
101_130_BN020.wiff	Library Peptides	Shank2	LLDPSSPLALALSAR	LLDPSSPLALALSAR	38.93	14392	20
101_130_BN021.wiff	Library Peptides	Shank2	LLDPSSPLALALSAR	LLDPSSPLALALSAR	38.86	19543	21
101_130_BN022.wiff	Library Peptides	Shank2	LLDPSSPLALALSAR	LLDPSSPLALALSAR	38.98	15406	22
101_130_BN023.wiff	Library Peptides	Shank2	LLDPSSPLALALSAR	LLDPSSPLALALSAR	39.06	15718	23
101_130_BN024.wiff	Library Peptides	Shank2	LLDPSSPLALALSAR	LLDPSSPLALALSAR	39.67	13740	24
101_130_BN025.wiff	Library Peptides	Shank2	LLDPSSPLALALSAR	LLDPSSPLALALSAR	40.11	19988	25
101_130_BN026.wiff	Library Peptides	Shank2	LLDPSSPLALALSAR	LLDPSSPLALALSAR	42.41	86729	26
101_130_BN027.wiff	Library Peptides	Shank2	LLDPSSPLALALSAR	LLDPSSPLALALSAR	42.34	70443	27
101_130_BN028.wiff	Library Peptides	Shank2	LLDPSSPLALALSAR	LLDPSSPLALALSAR	39.28	46868	28
101_130_BN029.wiff	Library Peptides	Shank2	LLDPSSPLALALSAR	LLDPSSPLALALSAR	38.92	26880	29
101_130_BN030.wiff	Library Peptides	Shank2	LLDPSSPLALALSAR	LLDPSSPLALALSAR	38.42	32263	30
101_130_BN001.wiff	Library Peptides	Dynamin-1	LQDAFSAIGQNADLDLPQIAVVGGQSAGK	LQDAFSAIGQNADLDLPQIAVVGGQSAGK	38.56	1166	1
101_130_BN002.wiff	Library Peptides	Dynamin-1	LQDAFSAIGQNADLDLPQIAVVGGQSAGK	LQDAFSAIGQNADLDLPQIAVVGGQSAGK	38.63	5290	2
101_130_BN003.wiff	Library Peptides	Dynamin-1	LQDAFSAIGQNADLDLPQIAVVGGQSAGK	LQDAFSAIGQNADLDLPQIAVVGGQSAGK	38.21	4105	3
101_130_BN004.wiff	Library Peptides	Dynamin-1	LQDAFSAIGQNADLDLPQIAVVGGQSAGK	LQDAFSAIGQNADLDLPQIAVVGGQSAGK	38.23	2888	4
101_130_BN005.wiff	Library Peptides	Dynamin-1	LQDAFSAIGQNADLDLPQIAVVGGQSAGK	LQDAFSAIGQNADLDLPQIAVVGGQSAGK	38.02	3453	5
101_130_BN006.wiff	Library Peptides	Dynamin-1	LQDAFSAIGQNADLDLPQIAVVGGQSAGK	LQDAFSAIGQNADLDLPQIAVVGGQSAGK	37.88	6834	6
101_130_BN007.wiff	Library Peptides	Dynamin-1	LQDAFSAIGQNADLDLPQIAVVGGQSAGK	LQDAFSAIGQNADLDLPQIAVVGGQSAGK	37.67	5414	7
101_130_BN008.wiff	Library Peptides	Dynamin-1	LQDAFSAIGQNADLDLPQIAVVGGQSAGK	LQDAFSAIGQNADLDLPQIAVVGGQSAGK	37.71	5907	8
101_130_BN009.wiff	Library Peptides	Dynamin-1	LQDAFSAIGQNADLDLPQIAVVGGQSAGK	LQDAFSAIGQNADLDLPQIAVVGGQSAGK	37.55	4986	9
101_130_BN010.wiff	Library Peptides	Dynamin-1	LQDAFSAIGQNADLDLPQIAVVGGQSAGK	LQDAFSAIGQNADLDLPQIAVVGGQSAGK	37.72	4254	10
101_130_BN011.wiff	Library Peptides	Dynamin-1	LQDAFSAIGQNADLDLPQIAVVGGQSAGK	LQDAFSAIGQNADLDLPQIAVVGGQSAGK	37.72	6319	11
101_130_BN012.wiff	Library Peptides	Dynamin-1	LQDAFSAIGQNADLDLPQIAVVGGQSAGK	LQDAFSAIGQNADLDLPQIAVVGGQSAGK	37.8	10696	12
101_130_BN013.wiff	Library Peptides	Dynamin-1	LQDAFSAIGQNADLDLPQIAVVGGQSAGK	LQDAFSAIGQNADLDLPQIAVVGGQSAGK	37.71	31700	13
101_130_BN014.wiff	Library Peptides	Dynamin-1	LQDAFSAIGQNADLDLPQIAVVGGQSAGK	LQDAFSAIGQNADLDLPQIAVVGGQSAGK	37.64	28513	14
101_130_BN015.wiff	Library Peptides	Dynamin-1	LQDAFSAIGQNADLDLPQIAVVGGQSAGK	LQDAFSAIGQNADLDLPQIAVVGGQSAGK	37.88	24558	15
101_130_BN016.wiff	Library Peptides	Dynamin-1	LQDAFSAIGQNADLDLPQIAVVGGQSAGK	LQDAFSAIGQNADLDLPQIAVVGGQSAGK	37.92	22948	16
101_130_BN017.wiff	Library Peptides	Dynamin-1	LQDAFSAIGQNADLDLPQIAVVGGQSAGK	LQDAFSAIGQNADLDLPQIAVVGGQSAGK	38	34100	17
101_130_BN018.wiff	Library Peptides	Dynamin-1	LQDAFSAIGQNADLDLPQIAVVGGQSAGK	LQDAFSAIGQNADLDLPQIAVVGGQSAGK	38.09	36457	18
101_130_BN019.wiff	Library Peptides	Dynamin-1	LQDAFSAIGQNADLDLPQIAVVGGQSAGK	LQDAFSAIGQNADLDLPQIAVVGGQSAGK	38.23	22322	19
101_130_BN020.wiff	Library Peptides	Dynamin-1	LQDAFSAIGQNADLDLPQIAVVGGQSAGK	LQDAFSAIGQNADLDLPQIAVVGGQSAGK	37.97	23147	20
101_130_BN021.wiff	Library Peptides	Dynamin-1	LQDAFSAIGQNADLDLPQIAVVGGQSAGK	LQDAFSAIGQNADLDLPQIAVVGGQSAGK	37.97	27216	21
101_130_BN022.wiff	Library Peptides	Dynamin-1	LQDAFSAIGQNADLDLPQIAVVGGQSAGK	LQDAFSAIGQNADLDLPQIAVVGGQSAGK	37.99	25077	22
101_130_BN023.wiff	Library Peptides	Dynamin-1	LQDAFSAIGQNADLDLPQIAVVGGQSAGK	LQDAFSAIGQNADLDLPQIAVVGGQSAGK	38.06	35017	23
101_130_BN024.wiff	Library Peptides	Dynamin-1	LQDAFSAIGQNADLDLPQIAVVGGQSAGK	LQDAFSAIGQNADLDLPQIAVVGGQSAGK	38.52	49688	24
101_130_BN025.wiff	Library Peptides	Dynamin-1	LQDAFSAIGQNADLDLPQIAVVGGQSAGK	LQDAFSAIGQNADLDLPQIAVVGGQSAGK	38.66	52825	25
101_130_BN026.wiff	Library Peptides	Dynamin-1	LQDAFSAIGQNADLDLPQIAVVGGQSAGK	LQDAFSAIGQNADLDLPQIAVVGGQSAGK	40.55	42716	26
101_130_BN027.wiff	Library Peptides	Dynamin-1	LQDAFSAIGQNADLDLPQIAVVGGQSAGK	LQDAFSAIGQNADLDLPQIAVVGGQSAGK	40.22	55396	27
101_130_BN028.wiff	Library Peptides	Dynamin-1	LQDAFSAIGQNADLDLPQIAVVGGQSAGK	LQDAFSAIGQNADLDLPQIAVVGGQSAGK	38.15	74194	28
101_130_BN029.wiff	Library Peptides	Dynamin-1	LQDAFSAIGQNADLDLPQIAVVGGQSAGK	LQDAFSAIGQNADLDLPQIAVVGGQSAGK	37.94	45033	29
101_130_BN030.wiff	Library Peptides	Dynamin-1	LQDAFSAIGQNADLDLPQIAVVGGQSAGK	LQDAFSAIGQNADLDLPQIAVVGGQSAGK	37.56	50910	30
101_130_BN001.wiff	Library Peptides	ltpr1	LQDIVSALEDR	LQDIVSALEDR	32.22	3623	1
101_130_BN002.wiff	Library Peptides	ltpr1	LQDIVSALEDR	LQDIVSALEDR	32.45	2218	2
101_130_BN003.wiff	Library Peptides	ltpr1	LQDIVSALEDR	LQDIVSALEDR	31.79	5914	3
101_130_BN004.wiff	Library Peptides	ltpr1	LQDIVSALEDR	LQDIVSALEDR	31.61	3596	4
101_130_BN005.wiff	Library Peptides	ltpr1	LQDIVSALEDR	LQDIVSALEDR	31.84	3999	5
101_130_BN006.wiff	Library Peptides	ltpr1	LQDIVSALEDR	LQDIVSALEDR	31.5	1829	6
101_130_BN007.wiff	Library Peptides	ltpr1	LQDIVSALEDR	LQDIVSALEDR	31.55	2219	7
101_130_BN008.wiff	Library Peptides	ltpr1	LQDIVSALEDR	LQDIVSALEDR	31.39	1099	8
101_130_BN009.wiff	Library Peptides	ltpr1	LQDIVSALEDR	LQDIVSALEDR	31.35	564	9
101_130_BN010.wiff	Library Peptides	ltpr1	LQDIVSALEDR	LQDIVSALEDR	31.71	1838	10
101_130_BN011.wiff	Library Peptides	ltpr1	LQDIVSALEDR	LQDIVSALEDR	31.54	1917	11
101_130_BN012.wiff	Library Peptides	ltpr1	LQDIVSALEDR	LQDIVSALEDR	31.75	1627	12
101_130_BN013.wiff	Library Peptides	ltpr1	LQDIVSALEDR	LQDIVSALEDR	31.74	1055	13
101_130_BN014.wiff	Library Peptides	ltpr1	LQDIVSALEDR	LQDIVSALEDR	31.73	829	14
101_130_BN015.wiff	Library Peptides	ltpr1	LQDIVSALEDR	LQDIVSALEDR	31.59	1833	15
101_130_BN016.wiff	Library Peptides	ltpr1	LQDIVSALEDR	LQDIVSALEDR	31.85	319	16
101_130_BN017.wiff	Library Peptides	ltpr1	LQDIVSALEDR	LQDIVSALEDR	31.48	2111	17
101_130_BN018.wiff	Library Peptides	ltpr1	LQDIVSALEDR	LQDIVSALEDR	31.79	1559	18
101_130_BN019.wiff	Library Peptides	ltpr1	LQDIVSALEDR	LQDIVSALEDR	31.8	1456	19
101_130_BN020.wiff	Library Peptides	ltpr1	LQDIVSALEDR	LQDIVSALEDR	31.63	3510	20
101_130_BN021.wiff	Library Peptides	ltpr1	LQDIVSALEDR	LQDIVSALEDR	31.59	4474	21
101_130_BN022.wiff	Library Peptides	ltpr1	LQDIVSALEDR	LQDIVSALEDR	31.43	2517	22
101_130_BN023.wiff	Library Peptides	ltpr1	LQDIVSALEDR	LQDIVSALEDR	31.69	3056	23
101_130_BN024.wiff	Library Peptides	ltpr1	LQDIVSALEDR	LQDIVSALEDR	31.91	1091	24
101_130_BN025.wiff	Library Peptides	ltpr1	LQDIVSALEDR	LQDIVSALEDR	31.89	2986	25
101_130_BN026.wiff	Library Peptides	ltpr1	LQDIVSALEDR	LQDIVSALEDR	34.49	23483	26
101_130_BN027.wiff	Library Peptides	ltpr1	LQDIVSALEDR	LQDIVSALEDR	33.46	51146	27
101_130_BN028.wiff	Library Peptides	ltpr1	LQDIVSALEDR	LQDIVSALEDR	31.82	76253	28
101_130_BN029.wiff	Library Peptides	ltpr1	LQDIVSALEDR	LQDIVSALEDR	31.65	36934	29
101_130_BN030.wiff	Library Peptides	ltpr1	LQDIVSALEDR	LQDIVSALEDR	31.32	24572	30
101_130_BN001.wiff	Library Peptides	Nptxr	MDELEGQLLAK	M[+16]DELEGQLLAK	25.33	7247	1
101_130_BN002.wiff	Library Peptides	Nptxr	MDELEGQLLAK	M[+16]DELEGQLLAK	25.59	16919	2
101_130_BN003.wiff	Library Peptides	Nptxr	MDELEGQLLAK	M[+16]DELEGQLLAK	25.62	19206	3
101_130_BN004.wiff	Library Peptides	Nptxr	MDELEGQLLAK	M[+16]DELEGQLLAK	25.44	27496	4
101_130_BN005.wiff	Library Peptides	Nptxr	MDELEGQLLAK	M[+16]DELEGQLLAK	25.46	47675	5
101_130_BN006.wiff	Library Peptides	Nptxr	MDELEGQLLAK	M[+16]DELEGQLLAK	25.41	31449	6
101_130_BN007.wiff	Library Peptides	Nptxr	MDELEGQLLAK	M[+16]DELEGQLLAK	25.34	34097	7
101_130_BN008.wiff	Library Peptides	Nptxr	MDELEGQLLAK	M[+16]DELEGQLLAK	25.29	36500	8
101_130_BN009.wiff	Library Peptides	Nptxr	MDELEGQLLAK	M[+16]DELEGQLLAK	25.2	13502	9
101_130_BN010.wiff	Library Peptides	Nptxr	MDELEGQLLAK	M[+16]DELEGQLLAK	25.26	33759	10
101_130_BN011.wiff	Library Peptides	Nptxr	MDELEGQLLAK	M[+16]DELEGQLLAK	25.3	13545	11
101_130_BN012.wiff	Library Peptides	Nptxr	MDELEGQLLAK	M[+16]DELEGQLLAK	25.07	704	12
101_130_BN013.wiff	Library Peptides	Nptxr	MDELEGQLLAK	M[+16]DELEGQLLAK	25.3	3738	13
101_130_BN014.wiff	Library Peptides	Nptxr	MDELEGQLLAK	M[+16]DELEGQLLAK	25.22	2545	14
101_130_BN015.wiff	Library Peptides	Nptxr	MDELEGQLLAK	M[+16]DELEGQLLAK	25.27	2649	15
101_130_BN016.wiff	Library Peptides	Nptxr	MDELEGQLLAK	M[+16]DELEGQLLAK	25.15	3657	16
101_130_BN017.wiff	Library Peptides	Nptxr	MDELEGQLLAK	M[+16]DELEGQLLAK	25.34	7893	17
101_130_BN018.wiff	Library Peptides	Nptxr	MDELEGQLLAK	M[+16]DELEGQLLAK	25.16	17692	18
101_130_BN019.wiff	Library Peptides	Nptxr	MDELEGQLLAK	M[+16]DELEGQLLAK	25.21	11930	19
101_130_BN020.wiff	Library Peptides	Nptxr	MDELEGQLLAK	M[+16]DELEGQLLAK	25.31	17905	20
101_130_BN021.wiff	Library Peptides	Nptxr	MDELEGQLLAK	M[+16]DELEGQLLAK	25.24	24095	21
101_130_BN022.wiff	Library Peptides	Nptxr	MDELEGQLLAK	M[+16]DELEGQLLAK	25.32	13488	22
101_130_BN023.wiff	Library Peptides	Nptxr	MDELEGQLLAK	M[+16]DELEGQLLAK	25.3	9104	23
101_130_BN024.wiff	Library Peptides	Nptxr	MDELEGQLLAK	M[+16]DELEGQLLAK	25.35	8567	24
101_130_BN025.wiff	Library Peptides	Nptxr	MDELEGQLLAK	M[+16]DELEGQLLAK	25.41	6431	25
101_130_BN026.wiff	Library Peptides	Nptxr	MDELEGQLLAK	M[+16]DELEGQLLAK	26.24	3231	26
101_130_BN027.wiff	Library Peptides	Nptxr	MDELEGQLLAK	M[+16]DELEGQLLAK	26.1	2337	27
101_130_BN028.wiff	Library Peptides	Nptxr	MDELEGQLLAK	M[+16]DELEGQLLAK	25.4	13067	28
101_130_BN029.wiff	Library Peptides	Nptxr	MDELEGQLLAK	M[+16]DELEGQLLAK	25.28	5476	29
101_130_BN030.wiff	Library Peptides	Nptxr	MDELEGQLLAK	M[+16]DELEGQLLAK	25.02	4972	30
101_130_BN001.wiff	Library Peptides	mGluR1	SNTFLNIFR	SNTFLNIFR	38.02	1267	1
101_130_BN002.wiff	Library Peptides	mGluR1	SNTFLNIFR	SNTFLNIFR	37.92	5028	2
101_130_BN003.wiff	Library Peptides	mGluR1	SNTFLNIFR	SNTFLNIFR	36.95	3963	3
101_130_BN004.wiff	Library Peptides	mGluR1	SNTFLNIFR	SNTFLNIFR	36.89	6567	4
101_130_BN005.wiff	Library Peptides	mGluR1	SNTFLNIFR	SNTFLNIFR	36.68	5095	5
101_130_BN006.wiff	Library Peptides	mGluR1	SNTFLNIFR	SNTFLNIFR	36.76	1599	6
101_130_BN007.wiff	Library Peptides	mGluR1	SNTFLNIFR	SNTFLNIFR	37.07	3371	7
101_130_BN008.wiff	Library Peptides	mGluR1	SNTFLNIFR	SNTFLNIFR	37.01	5787	8
101_130_BN009.wiff	Library Peptides	mGluR1	SNTFLNIFR	SNTFLNIFR	36.2	4745	9
101_130_BN010.wiff	Library Peptides	mGluR1	SNTFLNIFR	SNTFLNIFR	37.55	3674	10
101_130_BN011.wiff	Library Peptides	mGluR1	SNTFLNIFR	SNTFLNIFR	36.26	8152	11
101_130_BN012.wiff	Library Peptides	mGluR1	SNTFLNIFR	SNTFLNIFR	36.65	7814	12
101_130_BN013.wiff	Library Peptides	mGluR1	SNTFLNIFR	SNTFLNIFR	36.19	5830	13
101_130_BN014.wiff	Library Peptides	mGluR1	SNTFLNIFR	SNTFLNIFR	36.18	5788	14
101_130_BN015.wiff	Library Peptides	mGluR1	SNTFLNIFR	SNTFLNIFR	36.72	5417	15
101_130_BN016.wiff	Library Peptides	mGluR1	SNTFLNIFR	SNTFLNIFR	36.96	5820	16
101_130_BN017.wiff	Library Peptides	mGluR1	SNTFLNIFR	SNTFLNIFR	36.88	4562	17
101_130_BN018.wiff	Library Peptides	mGluR1	SNTFLNIFR	SNTFLNIFR	36.89	5897	18
101_130_BN019.wiff	Library Peptides	mGluR1	SNTFLNIFR	SNTFLNIFR	37.08	14371	19
101_130_BN020.wiff	Library Peptides	mGluR1	SNTFLNIFR	SNTFLNIFR	36.83	24603	20
101_130_BN021.wiff	Library Peptides	mGluR1	SNTFLNIFR	SNTFLNIFR	36.66	48640	21
101_130_BN022.wiff	Library Peptides	mGluR1	SNTFLNIFR	SNTFLNIFR	36.87	39201	22
101_130_BN023.wiff	Library Peptides	mGluR1	SNTFLNIFR	SNTFLNIFR	36.94	25307	23
101_130_BN024.wiff	Library Peptides	mGluR1	SNTFLNIFR	SNTFLNIFR	37.56	73393	24
101_130_BN025.wiff	Library Peptides	mGluR1	SNTFLNIFR	SNTFLNIFR	38.23	40082	25
101_130_BN026.wiff	Library Peptides	mGluR1	SNTFLNIFR	SNTFLNIFR	41.99	33609	26
101_130_BN027.wiff	Library Peptides	mGluR1	SNTFLNIFR	SNTFLNIFR	41.48	29120	27
101_130_BN028.wiff	Library Peptides	mGluR1	SNTFLNIFR	SNTFLNIFR	37.17	78864	28
101_130_BN029.wiff	Library Peptides	mGluR1	SNTFLNIFR	SNTFLNIFR	36.86	25546	29
101_130_BN030.wiff	Library Peptides	mGluR1	SNTFLNIFR	SNTFLNIFR	36.28	23587	30
101_130_BN001.wiff	Library Peptides	Nptx1	SNVLQLR	SNVLQLR	22.46	187	1
101_130_BN002.wiff	Library Peptides	Nptx1	SNVLQLR	SNVLQLR	22.84	401	2
101_130_BN003.wiff	Library Peptides	Nptx1	SNVLQLR	SNVLQLR	22.35	372	3
101_130_BN004.wiff	Library Peptides	Nptx1	SNVLQLR	SNVLQLR	22.06	1931	4
101_130_BN005.wiff	Library Peptides	Nptx1	SNVLQLR	SNVLQLR	22.2	561	5
101_130_BN006.wiff	Library Peptides	Nptx1	SNVLQLR	SNVLQLR	23.05	3012	6
101_130_BN007.wiff	Library Peptides	Nptx1	SNVLQLR	SNVLQLR	21.69	2139	7
101_130_BN008.wiff	Library Peptides	Nptx1	SNVLQLR	SNVLQLR	22.18	851	8
101_130_BN009.wiff	Library Peptides	Nptx1	SNVLQLR	SNVLQLR	21.81	1358	9
101_130_BN010.wiff	Library Peptides	Nptx1	SNVLQLR	SNVLQLR	22.19	450	10
101_130_BN011.wiff	Library Peptides	Nptx1	SNVLQLR	SNVLQLR	21.9	12230	11
101_130_BN012.wiff	Library Peptides	Nptx1	SNVLQLR	SNVLQLR	21.89	22501	12
101_130_BN013.wiff	Library Peptides	Nptx1	SNVLQLR	SNVLQLR	21.94	25759	13
101_130_BN014.wiff	Library Peptides	Nptx1	SNVLQLR	SNVLQLR	21.86	42287	14
101_130_BN015.wiff	Library Peptides	Nptx1	SNVLQLR	SNVLQLR	21.94	53948	15
101_130_BN016.wiff	Library Peptides	Nptx1	SNVLQLR	SNVLQLR	21.99	83123	16
101_130_BN017.wiff	Library Peptides	Nptx1	SNVLQLR	SNVLQLR	22.16	157792	17
101_130_BN018.wiff	Library Peptides	Nptx1	SNVLQLR	SNVLQLR	22.12	129653	18
101_130_BN019.wiff	Library Peptides	Nptx1	SNVLQLR	SNVLQLR	22.23	63373	19
101_130_BN020.wiff	Library Peptides	Nptx1	SNVLQLR	SNVLQLR	22.13	63136	20
101_130_BN021.wiff	Library Peptides	Nptx1	SNVLQLR	SNVLQLR	22.03	34990	21
101_130_BN022.wiff	Library Peptides	Nptx1	SNVLQLR	SNVLQLR	22.17	17696	22
101_130_BN023.wiff	Library Peptides	Nptx1	SNVLQLR	SNVLQLR	22.07	12074	23
101_130_BN024.wiff	Library Peptides	Nptx1	SNVLQLR	SNVLQLR	22.1	6726	24
101_130_BN025.wiff	Library Peptides	Nptx1	SNVLQLR	SNVLQLR	22.8	1601	25
101_130_BN026.wiff	Library Peptides	Nptx1	SNVLQLR	SNVLQLR	22.86	1222	26
101_130_BN027.wiff	Library Peptides	Nptx1	SNVLQLR	SNVLQLR	23.33	2188	27
101_130_BN028.wiff	Library Peptides	Nptx1	SNVLQLR	SNVLQLR	23.07	2983	28
101_130_BN029.wiff	Library Peptides	Nptx1	SNVLQLR	SNVLQLR	22.94	2901	29
101_130_BN030.wiff	Library Peptides	Nptx1	SNVLQLR	SNVLQLR	22.52	2816	30
101_130_BN001.wiff	Library Peptides	Cacna1g	SSFDLPDTLQVPGLHR	SSFDLPDTLQVPGLHR	34.47	53	1
101_130_BN002.wiff	Library Peptides	Cacna1g	SSFDLPDTLQVPGLHR	SSFDLPDTLQVPGLHR	34.43	1520	2
101_130_BN003.wiff	Library Peptides	Cacna1g	SSFDLPDTLQVPGLHR	SSFDLPDTLQVPGLHR	32.81	887	3
101_130_BN004.wiff	Library Peptides	Cacna1g	SSFDLPDTLQVPGLHR	SSFDLPDTLQVPGLHR	33.74	830	4
101_130_BN005.wiff	Library Peptides	Cacna1g	SSFDLPDTLQVPGLHR	SSFDLPDTLQVPGLHR	33.57	934	5
101_130_BN006.wiff	Library Peptides	Cacna1g	SSFDLPDTLQVPGLHR	SSFDLPDTLQVPGLHR	33.8	1016	6
101_130_BN007.wiff	Library Peptides	Cacna1g	SSFDLPDTLQVPGLHR	SSFDLPDTLQVPGLHR	34.29	2437	7
101_130_BN008.wiff	Library Peptides	Cacna1g	SSFDLPDTLQVPGLHR	SSFDLPDTLQVPGLHR	33.64	4936	8
101_130_BN009.wiff	Library Peptides	Cacna1g	SSFDLPDTLQVPGLHR	SSFDLPDTLQVPGLHR	33.31	2615	9
101_130_BN010.wiff	Library Peptides	Cacna1g	SSFDLPDTLQVPGLHR	SSFDLPDTLQVPGLHR	33.51	4437	10
101_130_BN011.wiff	Library Peptides	Cacna1g	SSFDLPDTLQVPGLHR	SSFDLPDTLQVPGLHR	33.77	1293	11
101_130_BN012.wiff	Library Peptides	Cacna1g	SSFDLPDTLQVPGLHR	SSFDLPDTLQVPGLHR	33.54	1427	12
101_130_BN013.wiff	Library Peptides	Cacna1g	SSFDLPDTLQVPGLHR	SSFDLPDTLQVPGLHR	33.61	1524	13
101_130_BN014.wiff	Library Peptides	Cacna1g	SSFDLPDTLQVPGLHR	SSFDLPDTLQVPGLHR	33.46	880	14
101_130_BN015.wiff	Library Peptides	Cacna1g	SSFDLPDTLQVPGLHR	SSFDLPDTLQVPGLHR	34.05	687	15
101_130_BN016.wiff	Library Peptides	Cacna1g	SSFDLPDTLQVPGLHR	SSFDLPDTLQVPGLHR	33.98	943	16
101_130_BN017.wiff	Library Peptides	Cacna1g	SSFDLPDTLQVPGLHR	SSFDLPDTLQVPGLHR	33.9	4112	17
101_130_BN018.wiff	Library Peptides	Cacna1g	SSFDLPDTLQVPGLHR	SSFDLPDTLQVPGLHR	33.68	1365	18
101_130_BN019.wiff	Library Peptides	Cacna1g	SSFDLPDTLQVPGLHR	SSFDLPDTLQVPGLHR	33.67	1827	19
101_130_BN020.wiff	Library Peptides	Cacna1g	SSFDLPDTLQVPGLHR	SSFDLPDTLQVPGLHR	33.5	5710	20
101_130_BN021.wiff	Library Peptides	Cacna1g	SSFDLPDTLQVPGLHR	SSFDLPDTLQVPGLHR	33.52	21465	21
101_130_BN022.wiff	Library Peptides	Cacna1g	SSFDLPDTLQVPGLHR	SSFDLPDTLQVPGLHR	33.53	38058	22
101_130_BN023.wiff	Library Peptides	Cacna1g	SSFDLPDTLQVPGLHR	SSFDLPDTLQVPGLHR	33.6	62174	23
101_130_BN024.wiff	Library Peptides	Cacna1g	SSFDLPDTLQVPGLHR	SSFDLPDTLQVPGLHR	34.08	109950	24
101_130_BN025.wiff	Library Peptides	Cacna1g	SSFDLPDTLQVPGLHR	SSFDLPDTLQVPGLHR	34.57	137788	25
101_130_BN026.wiff	Library Peptides	Cacna1g	SSFDLPDTLQVPGLHR	SSFDLPDTLQVPGLHR	40.03	188878	26
101_130_BN027.wiff	Library Peptides	Cacna1g	SSFDLPDTLQVPGLHR	SSFDLPDTLQVPGLHR	38.84	216742	27
101_130_BN028.wiff	Library Peptides	Cacna1g	SSFDLPDTLQVPGLHR	SSFDLPDTLQVPGLHR	33.73	172586	28
101_130_BN029.wiff	Library Peptides	Cacna1g	SSFDLPDTLQVPGLHR	SSFDLPDTLQVPGLHR	33.52	41223	29
101_130_BN030.wiff	Library Peptides	Cacna1g	SSFDLPDTLQVPGLHR	SSFDLPDTLQVPGLHR	33.18	38558	30
101_130_BN001.wiff	Library Peptides	mGluR1	SVSWSEPGGR	SVSWSEPGGR	18.28	188	1
101_130_BN002.wiff	Library Peptides	mGluR1	SVSWSEPGGR	SVSWSEPGGR	18.55	67	2
101_130_BN003.wiff	Library Peptides	mGluR1	SVSWSEPGGR	SVSWSEPGGR	18.69	47	3
101_130_BN004.wiff	Library Peptides	mGluR1	SVSWSEPGGR	SVSWSEPGGR	18.72	174	4
101_130_BN005.wiff	Library Peptides	mGluR1	SVSWSEPGGR	SVSWSEPGGR	18.28	136	5
101_130_BN006.wiff	Library Peptides	mGluR1	SVSWSEPGGR	SVSWSEPGGR	18.2	74	6
101_130_BN007.wiff	Library Peptides	mGluR1	SVSWSEPGGR	SVSWSEPGGR	18.31	483	7
101_130_BN008.wiff	Library Peptides	mGluR1	SVSWSEPGGR	SVSWSEPGGR	18.23	180	8
101_130_BN009.wiff	Library Peptides	mGluR1	SVSWSEPGGR	SVSWSEPGGR	18.35	368	9
101_130_BN010.wiff	Library Peptides	mGluR1	SVSWSEPGGR	SVSWSEPGGR	18.31	931	10
101_130_BN011.wiff	Library Peptides	mGluR1	SVSWSEPGGR	SVSWSEPGGR	18.43	343	11
101_130_BN012.wiff	Library Peptides	mGluR1	SVSWSEPGGR	SVSWSEPGGR	18.36	457	12
101_130_BN013.wiff	Library Peptides	mGluR1	SVSWSEPGGR	SVSWSEPGGR	18.53	289	13
101_130_BN014.wiff	Library Peptides	mGluR1	SVSWSEPGGR	SVSWSEPGGR	18.47	682	14
101_130_BN015.wiff	Library Peptides	mGluR1	SVSWSEPGGR	SVSWSEPGGR	18.33	97	15
101_130_BN016.wiff	Library Peptides	mGluR1	SVSWSEPGGR	SVSWSEPGGR	18.52	100	16
101_130_BN017.wiff	Library Peptides	mGluR1	SVSWSEPGGR	SVSWSEPGGR	18.59	793	17
101_130_BN018.wiff	Library Peptides	mGluR1	SVSWSEPGGR	SVSWSEPGGR	18.64	1250	18
101_130_BN019.wiff	Library Peptides	mGluR1	SVSWSEPGGR	SVSWSEPGGR	18.72	3002	19
101_130_BN020.wiff	Library Peptides	mGluR1	SVSWSEPGGR	SVSWSEPGGR	18.62	5630	20
101_130_BN021.wiff	Library Peptides	mGluR1	SVSWSEPGGR	SVSWSEPGGR	18.58	15374	21
101_130_BN022.wiff	Library Peptides	mGluR1	SVSWSEPGGR	SVSWSEPGGR	18.63	9954	22
101_130_BN023.wiff	Library Peptides	mGluR1	SVSWSEPGGR	SVSWSEPGGR	18.62	7409	23
101_130_BN024.wiff	Library Peptides	mGluR1	SVSWSEPGGR	SVSWSEPGGR	18.64	9405	24
101_130_BN025.wiff	Library Peptides	mGluR1	SVSWSEPGGR	SVSWSEPGGR	18.73	9328	25
101_130_BN026.wiff	Library Peptides	mGluR1	SVSWSEPGGR	SVSWSEPGGR	19.08	8134	26
101_130_BN027.wiff	Library Peptides	mGluR1	SVSWSEPGGR	SVSWSEPGGR	19.01	13580	27
101_130_BN028.wiff	Library Peptides	mGluR1	SVSWSEPGGR	SVSWSEPGGR	18.65	18559	28
101_130_BN029.wiff	Library Peptides	mGluR1	SVSWSEPGGR	SVSWSEPGGR	18.55	7091	29
101_130_BN030.wiff	Library Peptides	mGluR1	SVSWSEPGGR	SVSWSEPGGR	18.27	6925	30
101_130_BN001.wiff	Library Peptides	Cacna1g	TDSLDVQGLGSR	TDSLDVQGLGSR	22.71	15427	1
101_130_BN002.wiff	Library Peptides	Cacna1g	TDSLDVQGLGSR	TDSLDVQGLGSR	22.93	19993	2
101_130_BN003.wiff	Library Peptides	Cacna1g	TDSLDVQGLGSR	TDSLDVQGLGSR	22.99	50113	3
101_130_BN004.wiff	Library Peptides	Cacna1g	TDSLDVQGLGSR	TDSLDVQGLGSR	22.82	82704	4
101_130_BN005.wiff	Library Peptides	Cacna1g	TDSLDVQGLGSR	TDSLDVQGLGSR	22.81	163531	5
101_130_BN006.wiff	Library Peptides	Cacna1g	TDSLDVQGLGSR	TDSLDVQGLGSR	22.75	293341	6
101_130_BN007.wiff	Library Peptides	Cacna1g	TDSLDVQGLGSR	TDSLDVQGLGSR	22.67	1094795	7
101_130_BN008.wiff	Library Peptides	Cacna1g	TDSLDVQGLGSR	TDSLDVQGLGSR	22.54	7297164	8
101_130_BN009.wiff	Library Peptides	Cacna1g	TDSLDVQGLGSR	TDSLDVQGLGSR	22.48	7740948	9
101_130_BN010.wiff	Library Peptides	Cacna1g	TDSLDVQGLGSR	TDSLDVQGLGSR	22.57	5015367	10
101_130_BN011.wiff	Library Peptides	Cacna1g	TDSLDVQGLGSR	TDSLDVQGLGSR	22.64	1693077	11
101_130_BN012.wiff	Library Peptides	Cacna1g	TDSLDVQGLGSR	TDSLDVQGLGSR	22.63	714816	12
101_130_BN013.wiff	Library Peptides	Cacna1g	TDSLDVQGLGSR	TDSLDVQGLGSR	22.66	756421	13
101_130_BN014.wiff	Library Peptides	Cacna1g	TDSLDVQGLGSR	TDSLDVQGLGSR	22.59	655215	14
101_130_BN015.wiff	Library Peptides	Cacna1g	TDSLDVQGLGSR	TDSLDVQGLGSR	22.68	523009	15
101_130_BN016.wiff	Library Peptides	Cacna1g	TDSLDVQGLGSR	TDSLDVQGLGSR	22.7	594638	16
101_130_BN017.wiff	Library Peptides	Cacna1g	TDSLDVQGLGSR	TDSLDVQGLGSR	22.88	669653	17
101_130_BN018.wiff	Library Peptides	Cacna1g	TDSLDVQGLGSR	TDSLDVQGLGSR	22.88	654554	18
101_130_BN019.wiff	Library Peptides	Cacna1g	TDSLDVQGLGSR	TDSLDVQGLGSR	22.96	418364	19
101_130_BN020.wiff	Library Peptides	Cacna1g	TDSLDVQGLGSR	TDSLDVQGLGSR	22.86	1124971	20
101_130_BN021.wiff	Library Peptides	Cacna1g	TDSLDVQGLGSR	TDSLDVQGLGSR	22.77	2392536	21
101_130_BN022.wiff	Library Peptides	Cacna1g	TDSLDVQGLGSR	TDSLDVQGLGSR	22.87	2008723	22
101_130_BN023.wiff	Library Peptides	Cacna1g	TDSLDVQGLGSR	TDSLDVQGLGSR	22.81	1355648	23
101_130_BN024.wiff	Library Peptides	Cacna1g	TDSLDVQGLGSR	TDSLDVQGLGSR	22.9	1382182	24
101_130_BN025.wiff	Library Peptides	Cacna1g	TDSLDVQGLGSR	TDSLDVQGLGSR	22.9	990267	25
101_130_BN026.wiff	Library Peptides	Cacna1g	TDSLDVQGLGSR	TDSLDVQGLGSR	23.03	887691	26
101_130_BN027.wiff	Library Peptides	Cacna1g	TDSLDVQGLGSR	TDSLDVQGLGSR	23.08	530304	27
101_130_BN028.wiff	Library Peptides	Cacna1g	TDSLDVQGLGSR	TDSLDVQGLGSR	22.97	385413	28
101_130_BN029.wiff	Library Peptides	Cacna1g	TDSLDVQGLGSR	TDSLDVQGLGSR	22.84	112480	29
101_130_BN030.wiff	Library Peptides	Cacna1g	TDSLDVQGLGSR	TDSLDVQGLGSR	22.61	146610	30
101_130_BN001.wiff	Library Peptides	Nptx1	TPAAETLSQLGQTLQSLK	TPAAETLSQLGQTLQSLK	40.2	1226	1
101_130_BN002.wiff	Library Peptides	Nptx1	TPAAETLSQLGQTLQSLK	TPAAETLSQLGQTLQSLK	39.28	17759	2
101_130_BN003.wiff	Library Peptides	Nptx1	TPAAETLSQLGQTLQSLK	TPAAETLSQLGQTLQSLK	38.72	3645	3
101_130_BN004.wiff	Library Peptides	Nptx1	TPAAETLSQLGQTLQSLK	TPAAETLSQLGQTLQSLK	38.64	7083	4
101_130_BN005.wiff	Library Peptides	Nptx1	TPAAETLSQLGQTLQSLK	TPAAETLSQLGQTLQSLK	38.92	21897	5
101_130_BN006.wiff	Library Peptides	Nptx1	TPAAETLSQLGQTLQSLK	TPAAETLSQLGQTLQSLK	37.75	21053	6
101_130_BN007.wiff	Library Peptides	Nptx1	TPAAETLSQLGQTLQSLK	TPAAETLSQLGQTLQSLK	38.14	26130	7
101_130_BN008.wiff	Library Peptides	Nptx1	TPAAETLSQLGQTLQSLK	TPAAETLSQLGQTLQSLK	38.26	40958	8
101_130_BN009.wiff	Library Peptides	Nptx1	TPAAETLSQLGQTLQSLK	TPAAETLSQLGQTLQSLK	38.19	29616	9
101_130_BN010.wiff	Library Peptides	Nptx1	TPAAETLSQLGQTLQSLK	TPAAETLSQLGQTLQSLK	38.27	30757	10
101_130_BN011.wiff	Library Peptides	Nptx1	TPAAETLSQLGQTLQSLK	TPAAETLSQLGQTLQSLK	38.2	27593	11
101_130_BN012.wiff	Library Peptides	Nptx1	TPAAETLSQLGQTLQSLK	TPAAETLSQLGQTLQSLK	38.69	12032	12
101_130_BN013.wiff	Library Peptides	Nptx1	TPAAETLSQLGQTLQSLK	TPAAETLSQLGQTLQSLK	38.67	36768	13
101_130_BN014.wiff	Library Peptides	Nptx1	TPAAETLSQLGQTLQSLK	TPAAETLSQLGQTLQSLK	38.56	129267	14
101_130_BN015.wiff	Library Peptides	Nptx1	TPAAETLSQLGQTLQSLK	TPAAETLSQLGQTLQSLK	38.78	249486	15
101_130_BN016.wiff	Library Peptides	Nptx1	TPAAETLSQLGQTLQSLK	TPAAETLSQLGQTLQSLK	38.82	418640	16
101_130_BN017.wiff	Library Peptides	Nptx1	TPAAETLSQLGQTLQSLK	TPAAETLSQLGQTLQSLK	38.96	1067158	17
101_130_BN018.wiff	Library Peptides	Nptx1	TPAAETLSQLGQTLQSLK	TPAAETLSQLGQTLQSLK	39.01	1033107	18
101_130_BN019.wiff	Library Peptides	Nptx1	TPAAETLSQLGQTLQSLK	TPAAETLSQLGQTLQSLK	39.17	431374	19
101_130_BN020.wiff	Library Peptides	Nptx1	TPAAETLSQLGQTLQSLK	TPAAETLSQLGQTLQSLK	38.93	503388	20
101_130_BN021.wiff	Library Peptides	Nptx1	TPAAETLSQLGQTLQSLK	TPAAETLSQLGQTLQSLK	38.96	456461	21
101_130_BN022.wiff	Library Peptides	Nptx1	TPAAETLSQLGQTLQSLK	TPAAETLSQLGQTLQSLK	38.97	138641	22
101_130_BN023.wiff	Library Peptides	Nptx1	TPAAETLSQLGQTLQSLK	TPAAETLSQLGQTLQSLK	39.07	75307	23
101_130_BN024.wiff	Library Peptides	Nptx1	TPAAETLSQLGQTLQSLK	TPAAETLSQLGQTLQSLK	39.8	127602	24
101_130_BN025.wiff	Library Peptides	Nptx1	TPAAETLSQLGQTLQSLK	TPAAETLSQLGQTLQSLK	40.14	57991	25
101_130_BN026.wiff	Library Peptides	Nptx1	TPAAETLSQLGQTLQSLK	TPAAETLSQLGQTLQSLK	41.63	32095	26
101_130_BN027.wiff	Library Peptides	Nptx1	TPAAETLSQLGQTLQSLK	TPAAETLSQLGQTLQSLK	41.35	11210	27
101_130_BN028.wiff	Library Peptides	Nptx1	TPAAETLSQLGQTLQSLK	TPAAETLSQLGQTLQSLK	39.25	17332	28
101_130_BN029.wiff	Library Peptides	Nptx1	TPAAETLSQLGQTLQSLK	TPAAETLSQLGQTLQSLK	38.89	9871	29
101_130_BN030.wiff	Library Peptides	Nptx1	TPAAETLSQLGQTLQSLK	TPAAETLSQLGQTLQSLK	38.42	29896	30
101_130_BN001.wiff	Library Peptides	Cdc42bpa serine/threonine-protein kinase MRCK alpha	TVFSGSVSIPSITK	TVFSGSVSIPSITK	31.24	1323	1
101_130_BN002.wiff	Library Peptides	Cdc42bpa serine/threonine-protein kinase MRCK alpha	TVFSGSVSIPSITK	TVFSGSVSIPSITK	31.28	1004	2
101_130_BN003.wiff	Library Peptides	Cdc42bpa serine/threonine-protein kinase MRCK alpha	TVFSGSVSIPSITK	TVFSGSVSIPSITK	30.63	781	3
101_130_BN004.wiff	Library Peptides	Cdc42bpa serine/threonine-protein kinase MRCK alpha	TVFSGSVSIPSITK	TVFSGSVSIPSITK	30.49	2046	4
101_130_BN005.wiff	Library Peptides	Cdc42bpa serine/threonine-protein kinase MRCK alpha	TVFSGSVSIPSITK	TVFSGSVSIPSITK	30.68	1073	5
101_130_BN006.wiff	Library Peptides	Cdc42bpa serine/threonine-protein kinase MRCK alpha	TVFSGSVSIPSITK	TVFSGSVSIPSITK	30.43	3330	6
101_130_BN007.wiff	Library Peptides	Cdc42bpa serine/threonine-protein kinase MRCK alpha	TVFSGSVSIPSITK	TVFSGSVSIPSITK	30.4	3955	7
101_130_BN008.wiff	Library Peptides	Cdc42bpa serine/threonine-protein kinase MRCK alpha	TVFSGSVSIPSITK	TVFSGSVSIPSITK	30.09	3980	8
101_130_BN009.wiff	Library Peptides	Cdc42bpa serine/threonine-protein kinase MRCK alpha	TVFSGSVSIPSITK	TVFSGSVSIPSITK	30.05	4740	9
101_130_BN010.wiff	Library Peptides	Cdc42bpa serine/threonine-protein kinase MRCK alpha	TVFSGSVSIPSITK	TVFSGSVSIPSITK	30.77	3588	10
101_130_BN011.wiff	Library Peptides	Cdc42bpa serine/threonine-protein kinase MRCK alpha	TVFSGSVSIPSITK	TVFSGSVSIPSITK	30.1	2630	11
101_130_BN012.wiff	Library Peptides	Cdc42bpa serine/threonine-protein kinase MRCK alpha	TVFSGSVSIPSITK	TVFSGSVSIPSITK	30.18	1945	12
101_130_BN013.wiff	Library Peptides	Cdc42bpa serine/threonine-protein kinase MRCK alpha	TVFSGSVSIPSITK	TVFSGSVSIPSITK	30.01	5920	13
101_130_BN014.wiff	Library Peptides	Cdc42bpa serine/threonine-protein kinase MRCK alpha	TVFSGSVSIPSITK	TVFSGSVSIPSITK	29.67	2185	14
101_130_BN015.wiff	Library Peptides	Cdc42bpa serine/threonine-protein kinase MRCK alpha	TVFSGSVSIPSITK	TVFSGSVSIPSITK	30.32	1733	15
101_130_BN016.wiff	Library Peptides	Cdc42bpa serine/threonine-protein kinase MRCK alpha	TVFSGSVSIPSITK	TVFSGSVSIPSITK	30.03	4412	16
101_130_BN017.wiff	Library Peptides	Cdc42bpa serine/threonine-protein kinase MRCK alpha	TVFSGSVSIPSITK	TVFSGSVSIPSITK	30.16	3646	17
101_130_BN018.wiff	Library Peptides	Cdc42bpa serine/threonine-protein kinase MRCK alpha	TVFSGSVSIPSITK	TVFSGSVSIPSITK	30.3	3254	18
101_130_BN019.wiff	Library Peptides	Cdc42bpa serine/threonine-protein kinase MRCK alpha	TVFSGSVSIPSITK	TVFSGSVSIPSITK	30.89	2007	19
101_130_BN020.wiff	Library Peptides	Cdc42bpa serine/threonine-protein kinase MRCK alpha	TVFSGSVSIPSITK	TVFSGSVSIPSITK	30.75	1442	20
101_130_BN021.wiff	Library Peptides	Cdc42bpa serine/threonine-protein kinase MRCK alpha	TVFSGSVSIPSITK	TVFSGSVSIPSITK	30.78	5098	21
101_130_BN022.wiff	Library Peptides	Cdc42bpa serine/threonine-protein kinase MRCK alpha	TVFSGSVSIPSITK	TVFSGSVSIPSITK	30.56	8572	22
101_130_BN023.wiff	Library Peptides	Cdc42bpa serine/threonine-protein kinase MRCK alpha	TVFSGSVSIPSITK	TVFSGSVSIPSITK	30.57	17894	23
101_130_BN024.wiff	Library Peptides	Cdc42bpa serine/threonine-protein kinase MRCK alpha	TVFSGSVSIPSITK	TVFSGSVSIPSITK	30.71	43096	24
101_130_BN025.wiff	Library Peptides	Cdc42bpa serine/threonine-protein kinase MRCK alpha	TVFSGSVSIPSITK	TVFSGSVSIPSITK	30.73	61620	25
101_130_BN026.wiff	Library Peptides	Cdc42bpa serine/threonine-protein kinase MRCK alpha	TVFSGSVSIPSITK	TVFSGSVSIPSITK	32.78	84174	26
101_130_BN027.wiff	Library Peptides	Cdc42bpa serine/threonine-protein kinase MRCK alpha	TVFSGSVSIPSITK	TVFSGSVSIPSITK	32.11	79023	27
101_130_BN028.wiff	Library Peptides	Cdc42bpa serine/threonine-protein kinase MRCK alpha	TVFSGSVSIPSITK	TVFSGSVSIPSITK	30.69	96868	28
101_130_BN029.wiff	Library Peptides	Cdc42bpa serine/threonine-protein kinase MRCK alpha	TVFSGSVSIPSITK	TVFSGSVSIPSITK	30.56	39570	29
101_130_BN030.wiff	Library Peptides	Cdc42bpa serine/threonine-protein kinase MRCK alpha	TVFSGSVSIPSITK	TVFSGSVSIPSITK	30.16	42805	30
101_130_BN001.wiff	Library Peptides	Synapsin-1	TYATAEPFIDAK	TYATAEPFIDAK	26.39	644	1
101_130_BN002.wiff	Library Peptides	Synapsin-1	TYATAEPFIDAK	TYATAEPFIDAK	26.35	698	2
101_130_BN003.wiff	Library Peptides	Synapsin-1	TYATAEPFIDAK	TYATAEPFIDAK	26.07	854	3
101_130_BN004.wiff	Library Peptides	Synapsin-1	TYATAEPFIDAK	TYATAEPFIDAK	25.88	896	4
101_130_BN005.wiff	Library Peptides	Synapsin-1	TYATAEPFIDAK	TYATAEPFIDAK	25.94	805	5
101_130_BN006.wiff	Library Peptides	Synapsin-1	TYATAEPFIDAK	TYATAEPFIDAK	25.96	986	6
101_130_BN007.wiff	Library Peptides	Synapsin-1	TYATAEPFIDAK	TYATAEPFIDAK	26.19	4379	7
101_130_BN008.wiff	Library Peptides	Synapsin-1	TYATAEPFIDAK	TYATAEPFIDAK	25.82	6740	8
101_130_BN009.wiff	Library Peptides	Synapsin-1	TYATAEPFIDAK	TYATAEPFIDAK	25.76	5755	9
101_130_BN010.wiff	Library Peptides	Synapsin-1	TYATAEPFIDAK	TYATAEPFIDAK	25.79	11874	10
101_130_BN011.wiff	Library Peptides	Synapsin-1	TYATAEPFIDAK	TYATAEPFIDAK	25.8	22074	11
101_130_BN012.wiff	Library Peptides	Synapsin-1	TYATAEPFIDAK	TYATAEPFIDAK	25.81	13227	12
101_130_BN013.wiff	Library Peptides	Synapsin-1	TYATAEPFIDAK	TYATAEPFIDAK	25.83	13685	13
101_130_BN014.wiff	Library Peptides	Synapsin-1	TYATAEPFIDAK	TYATAEPFIDAK	25.75	7959	14
101_130_BN015.wiff	Library Peptides	Synapsin-1	TYATAEPFIDAK	TYATAEPFIDAK	25.82	5205	15
101_130_BN016.wiff	Library Peptides	Synapsin-1	TYATAEPFIDAK	TYATAEPFIDAK	25.83	4034	16
101_130_BN017.wiff	Library Peptides	Synapsin-1	TYATAEPFIDAK	TYATAEPFIDAK	26.07	4328	17
101_130_BN018.wiff	Library Peptides	Synapsin-1	TYATAEPFIDAK	TYATAEPFIDAK	26.06	2697	18
101_130_BN019.wiff	Library Peptides	Synapsin-1	TYATAEPFIDAK	TYATAEPFIDAK	26.31	4450	19
101_130_BN020.wiff	Library Peptides	Synapsin-1	TYATAEPFIDAK	TYATAEPFIDAK	25.99	3617	20
101_130_BN021.wiff	Library Peptides	Synapsin-1	TYATAEPFIDAK	TYATAEPFIDAK	26.3	3904	21
101_130_BN022.wiff	Library Peptides	Synapsin-1	TYATAEPFIDAK	TYATAEPFIDAK	26.01	2783	22
101_130_BN023.wiff	Library Peptides	Synapsin-1	TYATAEPFIDAK	TYATAEPFIDAK	25.93	1848	23
101_130_BN024.wiff	Library Peptides	Synapsin-1	TYATAEPFIDAK	TYATAEPFIDAK	26.26	3528	24
101_130_BN025.wiff	Library Peptides	Synapsin-1	TYATAEPFIDAK	TYATAEPFIDAK	26.11	3547	25
101_130_BN026.wiff	Library Peptides	Synapsin-1	TYATAEPFIDAK	TYATAEPFIDAK	26.32	1189	26
101_130_BN027.wiff	Library Peptides	Synapsin-1	TYATAEPFIDAK	TYATAEPFIDAK	26.87	6568	27
101_130_BN028.wiff	Library Peptides	Synapsin-1	TYATAEPFIDAK	TYATAEPFIDAK	26.22	13470	28
101_130_BN029.wiff	Library Peptides	Synapsin-1	TYATAEPFIDAK	TYATAEPFIDAK	26.09	11058	29
101_130_BN030.wiff	Library Peptides	Synapsin-1	TYATAEPFIDAK	TYATAEPFIDAK	25.83	12843	30
101_130_BN001.wiff	Library Peptides	Calmodulin	VFDKDGNGYISAAELR	VFDKDGNGYISAAELR	25.42	5196	1
101_130_BN002.wiff	Library Peptides	Calmodulin	VFDKDGNGYISAAELR	VFDKDGNGYISAAELR	25.84	18904	2
101_130_BN003.wiff	Library Peptides	Calmodulin	VFDKDGNGYISAAELR	VFDKDGNGYISAAELR	25.5	47226	3
101_130_BN004.wiff	Library Peptides	Calmodulin	VFDKDGNGYISAAELR	VFDKDGNGYISAAELR	25.32	51574	4
101_130_BN005.wiff	Library Peptides	Calmodulin	VFDKDGNGYISAAELR	VFDKDGNGYISAAELR	25.37	63923	5
101_130_BN006.wiff	Library Peptides	Calmodulin	VFDKDGNGYISAAELR	VFDKDGNGYISAAELR	25.26	64228	6
101_130_BN007.wiff	Library Peptides	Calmodulin	VFDKDGNGYISAAELR	VFDKDGNGYISAAELR	25.22	206377	7
101_130_BN008.wiff	Library Peptides	Calmodulin	VFDKDGNGYISAAELR	VFDKDGNGYISAAELR	25.14	814179	8
101_130_BN009.wiff	Library Peptides	Calmodulin	VFDKDGNGYISAAELR	VFDKDGNGYISAAELR	25.08	1004323	9
101_130_BN010.wiff	Library Peptides	Calmodulin	VFDKDGNGYISAAELR	VFDKDGNGYISAAELR	25.14	660659	10
101_130_BN011.wiff	Library Peptides	Calmodulin	VFDKDGNGYISAAELR	VFDKDGNGYISAAELR	25.11	258677	11
101_130_BN012.wiff	Library Peptides	Calmodulin	VFDKDGNGYISAAELR	VFDKDGNGYISAAELR	25.13	90802	12
101_130_BN013.wiff	Library Peptides	Calmodulin	VFDKDGNGYISAAELR	VFDKDGNGYISAAELR	25.17	89448	13
101_130_BN014.wiff	Library Peptides	Calmodulin	VFDKDGNGYISAAELR	VFDKDGNGYISAAELR	25.07	79400	14
101_130_BN015.wiff	Library Peptides	Calmodulin	VFDKDGNGYISAAELR	VFDKDGNGYISAAELR	25.18	58539	15
101_130_BN016.wiff	Library Peptides	Calmodulin	VFDKDGNGYISAAELR	VFDKDGNGYISAAELR	25.17	70822	16
101_130_BN017.wiff	Library Peptides	Calmodulin	VFDKDGNGYISAAELR	VFDKDGNGYISAAELR	25.41	93875	17
101_130_BN018.wiff	Library Peptides	Calmodulin	VFDKDGNGYISAAELR	VFDKDGNGYISAAELR	25.36	64278	18
101_130_BN019.wiff	Library Peptides	Calmodulin	VFDKDGNGYISAAELR	VFDKDGNGYISAAELR	25.47	40132	19
101_130_BN020.wiff	Library Peptides	Calmodulin	VFDKDGNGYISAAELR	VFDKDGNGYISAAELR	25.35	102824	20
101_130_BN021.wiff	Library Peptides	Calmodulin	VFDKDGNGYISAAELR	VFDKDGNGYISAAELR	25.27	181143	21
101_130_BN022.wiff	Library Peptides	Calmodulin	VFDKDGNGYISAAELR	VFDKDGNGYISAAELR	25.36	123744	22
101_130_BN023.wiff	Library Peptides	Calmodulin	VFDKDGNGYISAAELR	VFDKDGNGYISAAELR	25.36	100352	23
101_130_BN024.wiff	Library Peptides	Calmodulin	VFDKDGNGYISAAELR	VFDKDGNGYISAAELR	25.44	74779	24
101_130_BN025.wiff	Library Peptides	Calmodulin	VFDKDGNGYISAAELR	VFDKDGNGYISAAELR	26.23	127186	25
101_130_BN026.wiff	Library Peptides	Calmodulin	VFDKDGNGYISAAELR	VFDKDGNGYISAAELR	25.23	3622	26
101_130_BN027.wiff	Library Peptides	Calmodulin	VFDKDGNGYISAAELR	VFDKDGNGYISAAELR	25.27	1651	27
101_130_BN028.wiff	Library Peptides	Calmodulin	VFDKDGNGYISAAELR	VFDKDGNGYISAAELR	25.46	32155	28
101_130_BN029.wiff	Library Peptides	Calmodulin	VFDKDGNGYISAAELR	VFDKDGNGYISAAELR	25.32	7960	29
101_130_BN030.wiff	Library Peptides	Calmodulin	VFDKDGNGYISAAELR	VFDKDGNGYISAAELR	25.08	8048	30
101_130_BN001.wiff	Library Peptides	Nsf	VLDDGELLVQQTK	VLDDGELLVQQTK	26.2	3494	1
101_130_BN002.wiff	Library Peptides	Nsf	VLDDGELLVQQTK	VLDDGELLVQQTK	26.34	4174	2
101_130_BN003.wiff	Library Peptides	Nsf	VLDDGELLVQQTK	VLDDGELLVQQTK	26.38	4310	3
101_130_BN004.wiff	Library Peptides	Nsf	VLDDGELLVQQTK	VLDDGELLVQQTK	26.23	8723	4
101_130_BN005.wiff	Library Peptides	Nsf	VLDDGELLVQQTK	VLDDGELLVQQTK	26.25	4521	5
101_130_BN006.wiff	Library Peptides	Nsf	VLDDGELLVQQTK	VLDDGELLVQQTK	26.27	3007	6
101_130_BN007.wiff	Library Peptides	Nsf	VLDDGELLVQQTK	VLDDGELLVQQTK	26.12	5185	7
101_130_BN008.wiff	Library Peptides	Nsf	VLDDGELLVQQTK	VLDDGELLVQQTK	26.1	7011	8
101_130_BN009.wiff	Library Peptides	Nsf	VLDDGELLVQQTK	VLDDGELLVQQTK	26.13	3739	9
101_130_BN010.wiff	Library Peptides	Nsf	VLDDGELLVQQTK	VLDDGELLVQQTK	26.14	5960	10
101_130_BN011.wiff	Library Peptides	Nsf	VLDDGELLVQQTK	VLDDGELLVQQTK	26.3	3929	11
101_130_BN012.wiff	Library Peptides	Nsf	VLDDGELLVQQTK	VLDDGELLVQQTK	26.11	2995	12
101_130_BN013.wiff	Library Peptides	Nsf	VLDDGELLVQQTK	VLDDGELLVQQTK	26.15	6347	13
101_130_BN014.wiff	Library Peptides	Nsf	VLDDGELLVQQTK	VLDDGELLVQQTK	26.28	4025	14
101_130_BN015.wiff	Library Peptides	Nsf	VLDDGELLVQQTK	VLDDGELLVQQTK	26.14	5121	15
101_130_BN016.wiff	Library Peptides	Nsf	VLDDGELLVQQTK	VLDDGELLVQQTK	26.17	2413	16
101_130_BN017.wiff	Library Peptides	Nsf	VLDDGELLVQQTK	VLDDGELLVQQTK	26.53	5491	17
101_130_BN018.wiff	Library Peptides	Nsf	VLDDGELLVQQTK	VLDDGELLVQQTK	26.51	6615	18
101_130_BN019.wiff	Library Peptides	Nsf	VLDDGELLVQQTK	VLDDGELLVQQTK	26.6	5757	19
101_130_BN020.wiff	Library Peptides	Nsf	VLDDGELLVQQTK	VLDDGELLVQQTK	26.49	4059	20
101_130_BN021.wiff	Library Peptides	Nsf	VLDDGELLVQQTK	VLDDGELLVQQTK	26.47	5214	21
101_130_BN022.wiff	Library Peptides	Nsf	VLDDGELLVQQTK	VLDDGELLVQQTK	26.48	5810	22
101_130_BN023.wiff	Library Peptides	Nsf	VLDDGELLVQQTK	VLDDGELLVQQTK	26.51	6657	23
101_130_BN024.wiff	Library Peptides	Nsf	VLDDGELLVQQTK	VLDDGELLVQQTK	26.57	9266	24
101_130_BN025.wiff	Library Peptides	Nsf	VLDDGELLVQQTK	VLDDGELLVQQTK	26.58	13172	25
101_130_BN026.wiff	Library Peptides	Nsf	VLDDGELLVQQTK	VLDDGELLVQQTK	27.39	10589	26
101_130_BN027.wiff	Library Peptides	Nsf	VLDDGELLVQQTK	VLDDGELLVQQTK	27.44	23577	27
101_130_BN028.wiff	Library Peptides	Nsf	VLDDGELLVQQTK	VLDDGELLVQQTK	26.59	34851	28
101_130_BN029.wiff	Library Peptides	Nsf	VLDDGELLVQQTK	VLDDGELLVQQTK	26.45	20007	29
101_130_BN030.wiff	Library Peptides	Nsf	VLDDGELLVQQTK	VLDDGELLVQQTK	#N/A	#N/A	30
101_130_BN001.wiff	Library Peptides		VLLVIDEPHTDWAK	VLLVIDEPHTDWAK	31.65	400	1
101_130_BN002.wiff	Library Peptides		VLLVIDEPHTDWAK	VLLVIDEPHTDWAK	31.61	743	2
101_130_BN003.wiff	Library Peptides		VLLVIDEPHTDWAK	VLLVIDEPHTDWAK	31.24	1282	3
101_130_BN004.wiff	Library Peptides		VLLVIDEPHTDWAK	VLLVIDEPHTDWAK	30.62	2800	4
101_130_BN005.wiff	Library Peptides		VLLVIDEPHTDWAK	VLLVIDEPHTDWAK	31.18	2727	5
101_130_BN006.wiff	Library Peptides		VLLVIDEPHTDWAK	VLLVIDEPHTDWAK	30.34	3541	6
101_130_BN007.wiff	Library Peptides		VLLVIDEPHTDWAK	VLLVIDEPHTDWAK	30.47	2904	7
101_130_BN008.wiff	Library Peptides		VLLVIDEPHTDWAK	VLLVIDEPHTDWAK	30.5	7526	8
101_130_BN009.wiff	Library Peptides		VLLVIDEPHTDWAK	VLLVIDEPHTDWAK	30.72	31981	9
101_130_BN010.wiff	Library Peptides		VLLVIDEPHTDWAK	VLLVIDEPHTDWAK	30.5	13469	10
101_130_BN011.wiff	Library Peptides		VLLVIDEPHTDWAK	VLLVIDEPHTDWAK	30.45	24074	11
101_130_BN012.wiff	Library Peptides		VLLVIDEPHTDWAK	VLLVIDEPHTDWAK	30.45	14564	12
101_130_BN013.wiff	Library Peptides		VLLVIDEPHTDWAK	VLLVIDEPHTDWAK	30.45	16235	13
101_130_BN014.wiff	Library Peptides		VLLVIDEPHTDWAK	VLLVIDEPHTDWAK	30.38	7167	14
101_130_BN015.wiff	Library Peptides		VLLVIDEPHTDWAK	VLLVIDEPHTDWAK	30.58	4514	15
101_130_BN016.wiff	Library Peptides		VLLVIDEPHTDWAK	VLLVIDEPHTDWAK	30.51	2589	16
101_130_BN017.wiff	Library Peptides		VLLVIDEPHTDWAK	VLLVIDEPHTDWAK	30.72	3793	17
101_130_BN018.wiff	Library Peptides		VLLVIDEPHTDWAK	VLLVIDEPHTDWAK	30.71	1638	18
101_130_BN019.wiff	Library Peptides		VLLVIDEPHTDWAK	VLLVIDEPHTDWAK	30.84	1285	19
101_130_BN020.wiff	Library Peptides		VLLVIDEPHTDWAK	VLLVIDEPHTDWAK	30.64	3101	20
101_130_BN021.wiff	Library Peptides		VLLVIDEPHTDWAK	VLLVIDEPHTDWAK	30.4	2389	21
101_130_BN022.wiff	Library Peptides		VLLVIDEPHTDWAK	VLLVIDEPHTDWAK	30.74	1736	22
101_130_BN023.wiff	Library Peptides		VLLVIDEPHTDWAK	VLLVIDEPHTDWAK	31.03	4137	23
101_130_BN024.wiff	Library Peptides		VLLVIDEPHTDWAK	VLLVIDEPHTDWAK	31.63	6865	24
101_130_BN025.wiff	Library Peptides		VLLVIDEPHTDWAK	VLLVIDEPHTDWAK	30.36	611	25
101_130_BN026.wiff	Library Peptides		VLLVIDEPHTDWAK	VLLVIDEPHTDWAK	32.14	4280	26
101_130_BN027.wiff	Library Peptides		VLLVIDEPHTDWAK	VLLVIDEPHTDWAK	32.46	2388	27
101_130_BN028.wiff	Library Peptides		VLLVIDEPHTDWAK	VLLVIDEPHTDWAK	30.85	3101	28
101_130_BN029.wiff	Library Peptides		VLLVIDEPHTDWAK	VLLVIDEPHTDWAK	31.01	7616	29
101_130_BN030.wiff	Library Peptides		VLLVIDEPHTDWAK	VLLVIDEPHTDWAK	30.44	1046818	30
101_130_BN001.wiff	Library Peptides	Dynamin-1	VLNQQLTNHIR	VLNQQLTNHIR	18.13	77	1
101_130_BN002.wiff	Library Peptides	Dynamin-1	VLNQQLTNHIR	VLNQQLTNHIR	18.37	195	2
101_130_BN003.wiff	Library Peptides	Dynamin-1	VLNQQLTNHIR	VLNQQLTNHIR	18.28	142	3
101_130_BN004.wiff	Library Peptides	Dynamin-1	VLNQQLTNHIR	VLNQQLTNHIR	18.14	340	4
101_130_BN005.wiff	Library Peptides	Dynamin-1	VLNQQLTNHIR	VLNQQLTNHIR	18.1	260	5
101_130_BN006.wiff	Library Peptides	Dynamin-1	VLNQQLTNHIR	VLNQQLTNHIR	18.14	153	6
101_130_BN007.wiff	Library Peptides	Dynamin-1	VLNQQLTNHIR	VLNQQLTNHIR	17.97	473	7
101_130_BN008.wiff	Library Peptides	Dynamin-1	VLNQQLTNHIR	VLNQQLTNHIR	17.89	568	8
101_130_BN009.wiff	Library Peptides	Dynamin-1	VLNQQLTNHIR	VLNQQLTNHIR	17.86	355	9
101_130_BN010.wiff	Library Peptides	Dynamin-1	VLNQQLTNHIR	VLNQQLTNHIR	17.85	1256	10
101_130_BN011.wiff	Library Peptides	Dynamin-1	VLNQQLTNHIR	VLNQQLTNHIR	17.94	1865	11
101_130_BN012.wiff	Library Peptides	Dynamin-1	VLNQQLTNHIR	VLNQQLTNHIR	17.93	2905	12
101_130_BN013.wiff	Library Peptides	Dynamin-1	VLNQQLTNHIR	VLNQQLTNHIR	17.92	7568	13
101_130_BN014.wiff	Library Peptides	Dynamin-1	VLNQQLTNHIR	VLNQQLTNHIR	17.86	6497	14
101_130_BN015.wiff	Library Peptides	Dynamin-1	VLNQQLTNHIR	VLNQQLTNHIR	17.89	5411	15
101_130_BN016.wiff	Library Peptides	Dynamin-1	VLNQQLTNHIR	VLNQQLTNHIR	18.01	4915	16
101_130_BN017.wiff	Library Peptides	Dynamin-1	VLNQQLTNHIR	VLNQQLTNHIR	18.16	10083	17
101_130_BN018.wiff	Library Peptides	Dynamin-1	VLNQQLTNHIR	VLNQQLTNHIR	18.13	8388	18
101_130_BN019.wiff	Library Peptides	Dynamin-1	VLNQQLTNHIR	VLNQQLTNHIR	18.24	5850	19
101_130_BN020.wiff	Library Peptides	Dynamin-1	VLNQQLTNHIR	VLNQQLTNHIR	18.16	7329	20
101_130_BN021.wiff	Library Peptides	Dynamin-1	VLNQQLTNHIR	VLNQQLTNHIR	18.1	5933	21
101_130_BN022.wiff	Library Peptides	Dynamin-1	VLNQQLTNHIR	VLNQQLTNHIR	18.17	6878	22
101_130_BN023.wiff	Library Peptides	Dynamin-1	VLNQQLTNHIR	VLNQQLTNHIR	18.16	6531	23
101_130_BN024.wiff	Library Peptides	Dynamin-1	VLNQQLTNHIR	VLNQQLTNHIR	18.26	6491	24
101_130_BN025.wiff	Library Peptides	Dynamin-1	VLNQQLTNHIR	VLNQQLTNHIR	18.25	5471	25
101_130_BN026.wiff	Library Peptides	Dynamin-1	VLNQQLTNHIR	VLNQQLTNHIR	18.08	266	26
101_130_BN027.wiff	Library Peptides	Dynamin-1	VLNQQLTNHIR	VLNQQLTNHIR	18.15	130	27
101_130_BN028.wiff	Library Peptides	Dynamin-1	VLNQQLTNHIR	VLNQQLTNHIR	18.22	19384	28
101_130_BN029.wiff	Library Peptides	Dynamin-1	VLNQQLTNHIR	VLNQQLTNHIR	18.13	9719	29
101_130_BN030.wiff	Library Peptides	Dynamin-1	VLNQQLTNHIR	VLNQQLTNHIR	17.81	12200	30
101_130_BN001.wiff	Library Peptides	Slc9a1	VTPEEEEEDEDGIIMIR	VTPEEEEEDEDGIIM[+16]IR	26.82	1251	1
101_130_BN002.wiff	Library Peptides	Slc9a1	VTPEEEEEDEDGIIMIR	VTPEEEEEDEDGIIM[+16]IR	29.4	1713	2
101_130_BN003.wiff	Library Peptides	Slc9a1	VTPEEEEEDEDGIIMIR	VTPEEEEEDEDGIIM[+16]IR	27.73	437	3
101_130_BN004.wiff	Library Peptides	Slc9a1	VTPEEEEEDEDGIIMIR	VTPEEEEEDEDGIIM[+16]IR	28.22	2546	4
101_130_BN005.wiff	Library Peptides	Slc9a1	VTPEEEEEDEDGIIMIR	VTPEEEEEDEDGIIM[+16]IR	28.26	7254	5
101_130_BN006.wiff	Library Peptides	Slc9a1	VTPEEEEEDEDGIIMIR	VTPEEEEEDEDGIIM[+16]IR	28.19	21914	6
101_130_BN007.wiff	Library Peptides	Slc9a1	VTPEEEEEDEDGIIMIR	VTPEEEEEDEDGIIM[+16]IR	28.08	20819	7
101_130_BN008.wiff	Library Peptides	Slc9a1	VTPEEEEEDEDGIIMIR	VTPEEEEEDEDGIIM[+16]IR	27.58	10281	8
101_130_BN009.wiff	Library Peptides	Slc9a1	VTPEEEEEDEDGIIMIR	VTPEEEEEDEDGIIM[+16]IR	28.1	16381	9
101_130_BN010.wiff	Library Peptides	Slc9a1	VTPEEEEEDEDGIIMIR	VTPEEEEEDEDGIIM[+16]IR	27.62	6011	10
101_130_BN011.wiff	Library Peptides	Slc9a1	VTPEEEEEDEDGIIMIR	VTPEEEEEDEDGIIM[+16]IR	27.56	10667	11
101_130_BN012.wiff	Library Peptides	Slc9a1	VTPEEEEEDEDGIIMIR	VTPEEEEEDEDGIIM[+16]IR	27.66	5868	12
101_130_BN013.wiff	Library Peptides	Slc9a1	VTPEEEEEDEDGIIMIR	VTPEEEEEDEDGIIM[+16]IR	27.58	10652	13
101_130_BN014.wiff	Library Peptides	Slc9a1	VTPEEEEEDEDGIIMIR	VTPEEEEEDEDGIIM[+16]IR	27.52	16716	14
101_130_BN015.wiff	Library Peptides	Slc9a1	VTPEEEEEDEDGIIMIR	VTPEEEEEDEDGIIM[+16]IR	27.65	23887	15
101_130_BN016.wiff	Library Peptides	Slc9a1	VTPEEEEEDEDGIIMIR	VTPEEEEEDEDGIIM[+16]IR	27.62	31101	16
101_130_BN017.wiff	Library Peptides	Slc9a1	VTPEEEEEDEDGIIMIR	VTPEEEEEDEDGIIM[+16]IR	27.81	59197	17
101_130_BN018.wiff	Library Peptides	Slc9a1	VTPEEEEEDEDGIIMIR	VTPEEEEEDEDGIIM[+16]IR	27.82	279411	18
101_130_BN019.wiff	Library Peptides	Slc9a1	VTPEEEEEDEDGIIMIR	VTPEEEEEDEDGIIM[+16]IR	27.86	857231	19
101_130_BN020.wiff	Library Peptides	Slc9a1	VTPEEEEEDEDGIIMIR	VTPEEEEEDEDGIIM[+16]IR	27.71	1708803	20
101_130_BN021.wiff	Library Peptides	Slc9a1	VTPEEEEEDEDGIIMIR	VTPEEEEEDEDGIIM[+16]IR	27.66	2548628	21
101_130_BN022.wiff	Library Peptides	Slc9a1	VTPEEEEEDEDGIIMIR	VTPEEEEEDEDGIIM[+16]IR	27.7	1907373	22
101_130_BN023.wiff	Library Peptides	Slc9a1	VTPEEEEEDEDGIIMIR	VTPEEEEEDEDGIIM[+16]IR	27.73	1021067	23
101_130_BN024.wiff	Library Peptides	Slc9a1	VTPEEEEEDEDGIIMIR	VTPEEEEEDEDGIIM[+16]IR	27.83	823704	24
101_130_BN025.wiff	Library Peptides	Slc9a1	VTPEEEEEDEDGIIMIR	VTPEEEEEDEDGIIM[+16]IR	27.87	542435	25
101_130_BN026.wiff	Library Peptides	Slc9a1	VTPEEEEEDEDGIIMIR	VTPEEEEEDEDGIIM[+16]IR	28.86	345050	26
101_130_BN027.wiff	Library Peptides	Slc9a1	VTPEEEEEDEDGIIMIR	VTPEEEEEDEDGIIM[+16]IR	28.5	125512	27
101_130_BN028.wiff	Library Peptides	Slc9a1	VTPEEEEEDEDGIIMIR	VTPEEEEEDEDGIIM[+16]IR	27.84	62075	28
101_130_BN029.wiff	Library Peptides	Slc9a1	VTPEEEEEDEDGIIMIR	VTPEEEEEDEDGIIM[+16]IR	27.71	34224	29
101_130_BN030.wiff	Library Peptides	Slc9a1	VTPEEEEEDEDGIIMIR	VTPEEEEEDEDGIIM[+16]IR	27.47	45300	30
101_130_BN001.wiff	Library Peptides	LPPRP4	VTPVEGSEIGSETLSVSSSR	VTPVEGSEIGSETLSVSSSR	26.13	1096	1
101_130_BN002.wiff	Library Peptides	LPPRP4	VTPVEGSEIGSETLSVSSSR	VTPVEGSEIGSETLSVSSSR	26.43	6696	2
101_130_BN003.wiff	Library Peptides	LPPRP4	VTPVEGSEIGSETLSVSSSR	VTPVEGSEIGSETLSVSSSR	25.71	1323	3
101_130_BN004.wiff	Library Peptides	LPPRP4	VTPVEGSEIGSETLSVSSSR	VTPVEGSEIGSETLSVSSSR	25.75	3788	4
101_130_BN005.wiff	Library Peptides	LPPRP4	VTPVEGSEIGSETLSVSSSR	VTPVEGSEIGSETLSVSSSR	25.52	6114	5
101_130_BN006.wiff	Library Peptides	LPPRP4	VTPVEGSEIGSETLSVSSSR	VTPVEGSEIGSETLSVSSSR	25.53	1958	6
101_130_BN007.wiff	Library Peptides	LPPRP4	VTPVEGSEIGSETLSVSSSR	VTPVEGSEIGSETLSVSSSR	25.59	1169	7
101_130_BN008.wiff	Library Peptides	LPPRP4	VTPVEGSEIGSETLSVSSSR	VTPVEGSEIGSETLSVSSSR	25.48	4886	8
101_130_BN009.wiff	Library Peptides	LPPRP4	VTPVEGSEIGSETLSVSSSR	VTPVEGSEIGSETLSVSSSR	25.14	2016	9
101_130_BN010.wiff	Library Peptides	LPPRP4	VTPVEGSEIGSETLSVSSSR	VTPVEGSEIGSETLSVSSSR	25.48	2938	10
101_130_BN011.wiff	Library Peptides	LPPRP4	VTPVEGSEIGSETLSVSSSR	VTPVEGSEIGSETLSVSSSR	25.45	2241	11
101_130_BN012.wiff	Library Peptides	LPPRP4	VTPVEGSEIGSETLSVSSSR	VTPVEGSEIGSETLSVSSSR	25.41	644	12
101_130_BN013.wiff	Library Peptides	LPPRP4	VTPVEGSEIGSETLSVSSSR	VTPVEGSEIGSETLSVSSSR	25.42	3063	13
101_130_BN014.wiff	Library Peptides	LPPRP4	VTPVEGSEIGSETLSVSSSR	VTPVEGSEIGSETLSVSSSR	25.32	2384	14
101_130_BN015.wiff	Library Peptides	LPPRP4	VTPVEGSEIGSETLSVSSSR	VTPVEGSEIGSETLSVSSSR	25.43	3991	15
101_130_BN016.wiff	Library Peptides	LPPRP4	VTPVEGSEIGSETLSVSSSR	VTPVEGSEIGSETLSVSSSR	25.51	3641	16
101_130_BN017.wiff	Library Peptides	LPPRP4	VTPVEGSEIGSETLSVSSSR	VTPVEGSEIGSETLSVSSSR	25.62	2421	17
101_130_BN018.wiff	Library Peptides	LPPRP4	VTPVEGSEIGSETLSVSSSR	VTPVEGSEIGSETLSVSSSR	25.61	5255	18
101_130_BN019.wiff	Library Peptides	LPPRP4	VTPVEGSEIGSETLSVSSSR	VTPVEGSEIGSETLSVSSSR	25.66	3930	19
101_130_BN020.wiff	Library Peptides	LPPRP4	VTPVEGSEIGSETLSVSSSR	VTPVEGSEIGSETLSVSSSR	25.56	17336	20
101_130_BN021.wiff	Library Peptides	LPPRP4	VTPVEGSEIGSETLSVSSSR	VTPVEGSEIGSETLSVSSSR	25.53	32985	21
101_130_BN022.wiff	Library Peptides	LPPRP4	VTPVEGSEIGSETLSVSSSR	VTPVEGSEIGSETLSVSSSR	25.55	36279	22
101_130_BN023.wiff	Library Peptides	LPPRP4	VTPVEGSEIGSETLSVSSSR	VTPVEGSEIGSETLSVSSSR	25.54	29956	23
101_130_BN024.wiff	Library Peptides	LPPRP4	VTPVEGSEIGSETLSVSSSR	VTPVEGSEIGSETLSVSSSR	25.58	28721	24
101_130_BN025.wiff	Library Peptides	LPPRP4	VTPVEGSEIGSETLSVSSSR	VTPVEGSEIGSETLSVSSSR	25.58	26811	25
101_130_BN026.wiff	Library Peptides	LPPRP4	VTPVEGSEIGSETLSVSSSR	VTPVEGSEIGSETLSVSSSR	24.87	3890	26
101_130_BN027.wiff	Library Peptides	LPPRP4	VTPVEGSEIGSETLSVSSSR	VTPVEGSEIGSETLSVSSSR	26.41	3694	27
101_130_BN028.wiff	Library Peptides	LPPRP4	VTPVEGSEIGSETLSVSSSR	VTPVEGSEIGSETLSVSSSR	25.62	26442	28
101_130_BN029.wiff	Library Peptides	LPPRP4	VTPVEGSEIGSETLSVSSSR	VTPVEGSEIGSETLSVSSSR	25.53	12835	29
101_130_BN030.wiff	Library Peptides	LPPRP4	VTPVEGSEIGSETLSVSSSR	VTPVEGSEIGSETLSVSSSR	25.3	22001	30
101_130_BN001.wiff	Library Peptides	Grid2	VVTVLEEPFVMVSENVLGKPK	VVTVLEEPFVM[+16]VSENVLGKPK	40.23	2026	1
101_130_BN002.wiff	Library Peptides	Grid2	VVTVLEEPFVMVSENVLGKPK	VVTVLEEPFVM[+16]VSENVLGKPK	40.92	30649	2
101_130_BN003.wiff	Library Peptides	Grid2	VVTVLEEPFVMVSENVLGKPK	VVTVLEEPFVM[+16]VSENVLGKPK	39.25	3213	3
101_130_BN004.wiff	Library Peptides	Grid2	VVTVLEEPFVMVSENVLGKPK	VVTVLEEPFVM[+16]VSENVLGKPK	38.42	6533	4
101_130_BN005.wiff	Library Peptides	Grid2	VVTVLEEPFVMVSENVLGKPK	VVTVLEEPFVM[+16]VSENVLGKPK	38.46	23875	5
101_130_BN006.wiff	Library Peptides	Grid2	VVTVLEEPFVMVSENVLGKPK	VVTVLEEPFVM[+16]VSENVLGKPK	38.94	8179	6
101_130_BN007.wiff	Library Peptides	Grid2	VVTVLEEPFVMVSENVLGKPK	VVTVLEEPFVM[+16]VSENVLGKPK	38.95	14959	7
101_130_BN008.wiff	Library Peptides	Grid2	VVTVLEEPFVMVSENVLGKPK	VVTVLEEPFVM[+16]VSENVLGKPK	38.81	37521	8
101_130_BN009.wiff	Library Peptides	Grid2	VVTVLEEPFVMVSENVLGKPK	VVTVLEEPFVM[+16]VSENVLGKPK	38.06	11011	9
101_130_BN010.wiff	Library Peptides	Grid2	VVTVLEEPFVMVSENVLGKPK	VVTVLEEPFVM[+16]VSENVLGKPK	38.79	24666	10
101_130_BN011.wiff	Library Peptides	Grid2	VVTVLEEPFVMVSENVLGKPK	VVTVLEEPFVM[+16]VSENVLGKPK	38.7	14285	11
101_130_BN012.wiff	Library Peptides	Grid2	VVTVLEEPFVMVSENVLGKPK	VVTVLEEPFVM[+16]VSENVLGKPK	38.23	5888	12
101_130_BN013.wiff	Library Peptides	Grid2	VVTVLEEPFVMVSENVLGKPK	VVTVLEEPFVM[+16]VSENVLGKPK	38.7	15593	13
101_130_BN014.wiff	Library Peptides	Grid2	VVTVLEEPFVMVSENVLGKPK	VVTVLEEPFVM[+16]VSENVLGKPK	38	13982	14
101_130_BN015.wiff	Library Peptides	Grid2	VVTVLEEPFVMVSENVLGKPK	VVTVLEEPFVM[+16]VSENVLGKPK	38.81	13329	15
101_130_BN016.wiff	Library Peptides	Grid2	VVTVLEEPFVMVSENVLGKPK	VVTVLEEPFVM[+16]VSENVLGKPK	38.3	12873	16
101_130_BN017.wiff	Library Peptides	Grid2	VVTVLEEPFVMVSENVLGKPK	VVTVLEEPFVM[+16]VSENVLGKPK	38.46	14343	17
101_130_BN018.wiff	Library Peptides	Grid2	VVTVLEEPFVMVSENVLGKPK	VVTVLEEPFVM[+16]VSENVLGKPK	38.42	19076	18
101_130_BN019.wiff	Library Peptides	Grid2	VVTVLEEPFVMVSENVLGKPK	VVTVLEEPFVM[+16]VSENVLGKPK	39.1	16196	19
101_130_BN020.wiff	Library Peptides	Grid2	VVTVLEEPFVMVSENVLGKPK	VVTVLEEPFVM[+16]VSENVLGKPK	38.9	22741	20
101_130_BN021.wiff	Library Peptides	Grid2	VVTVLEEPFVMVSENVLGKPK	VVTVLEEPFVM[+16]VSENVLGKPK	38.85	14733	21
101_130_BN022.wiff	Library Peptides	Grid2	VVTVLEEPFVMVSENVLGKPK	VVTVLEEPFVM[+16]VSENVLGKPK	38.91	11649	22
101_130_BN023.wiff	Library Peptides	Grid2	VVTVLEEPFVMVSENVLGKPK	VVTVLEEPFVM[+16]VSENVLGKPK	38.41	8902	23
101_130_BN024.wiff	Library Peptides	Grid2	VVTVLEEPFVMVSENVLGKPK	VVTVLEEPFVM[+16]VSENVLGKPK	38.25	100691	24
101_130_BN025.wiff	Library Peptides	Grid2	VVTVLEEPFVMVSENVLGKPK	VVTVLEEPFVM[+16]VSENVLGKPK	39.06	130265	25
101_130_BN026.wiff	Library Peptides	Grid2	VVTVLEEPFVMVSENVLGKPK	VVTVLEEPFVM[+16]VSENVLGKPK	42.62	14368	26
101_130_BN027.wiff	Library Peptides	Grid2	VVTVLEEPFVMVSENVLGKPK	VVTVLEEPFVM[+16]VSENVLGKPK	42.32	14772	27
101_130_BN028.wiff	Library Peptides	Grid2	VVTVLEEPFVMVSENVLGKPK	VVTVLEEPFVM[+16]VSENVLGKPK	39.44	116511	28
101_130_BN029.wiff	Library Peptides	Grid2	VVTVLEEPFVMVSENVLGKPK	VVTVLEEPFVM[+16]VSENVLGKPK	38.76	174948	29
101_130_BN030.wiff	Library Peptides	Grid2	VVTVLEEPFVMVSENVLGKPK	VVTVLEEPFVM[+16]VSENVLGKPK	38.33	213635	30
101_130_BN001.wiff	Library Peptides		AAAAASGAGGVAVAGAGGAGPAGR	A[+42]AAAASGAGGVAVAGAGGAGPAGR	23.07	1028	1
101_130_BN002.wiff	Library Peptides		AAAAASGAGGVAVAGAGGAGPAGR	A[+42]AAAASGAGGVAVAGAGGAGPAGR	23.42	1375	2
101_130_BN003.wiff	Library Peptides		AAAAASGAGGVAVAGAGGAGPAGR	A[+42]AAAASGAGGVAVAGAGGAGPAGR	23.33	905	3
101_130_BN004.wiff	Library Peptides		AAAAASGAGGVAVAGAGGAGPAGR	A[+42]AAAASGAGGVAVAGAGGAGPAGR	23.59	1597	4
101_130_BN005.wiff	Library Peptides		AAAAASGAGGVAVAGAGGAGPAGR	A[+42]AAAASGAGGVAVAGAGGAGPAGR	22.89	1252	5
101_130_BN006.wiff	Library Peptides		AAAAASGAGGVAVAGAGGAGPAGR	A[+42]AAAASGAGGVAVAGAGGAGPAGR	23.01	846	6
101_130_BN007.wiff	Library Peptides		AAAAASGAGGVAVAGAGGAGPAGR	A[+42]AAAASGAGGVAVAGAGGAGPAGR	22.89	1330	7
101_130_BN008.wiff	Library Peptides		AAAAASGAGGVAVAGAGGAGPAGR	A[+42]AAAASGAGGVAVAGAGGAGPAGR	22.91	3142	8
101_130_BN009.wiff	Library Peptides		AAAAASGAGGVAVAGAGGAGPAGR	A[+42]AAAASGAGGVAVAGAGGAGPAGR	22.94	2158	9
101_130_BN010.wiff	Library Peptides		AAAAASGAGGVAVAGAGGAGPAGR	A[+42]AAAASGAGGVAVAGAGGAGPAGR	22.94	7577	10
101_130_BN011.wiff	Library Peptides		AAAAASGAGGVAVAGAGGAGPAGR	A[+42]AAAASGAGGVAVAGAGGAGPAGR	22.95	12508	11
101_130_BN012.wiff	Library Peptides		AAAAASGAGGVAVAGAGGAGPAGR	A[+42]AAAASGAGGVAVAGAGGAGPAGR	22.9	14438	12
101_130_BN013.wiff	Library Peptides		AAAAASGAGGVAVAGAGGAGPAGR	A[+42]AAAASGAGGVAVAGAGGAGPAGR	22.9	25164	13
101_130_BN014.wiff	Library Peptides		AAAAASGAGGVAVAGAGGAGPAGR	A[+42]AAAASGAGGVAVAGAGGAGPAGR	22.89	33151	14
101_130_BN015.wiff	Library Peptides		AAAAASGAGGVAVAGAGGAGPAGR	A[+42]AAAASGAGGVAVAGAGGAGPAGR	22.93	48592	15
101_130_BN016.wiff	Library Peptides		AAAAASGAGGVAVAGAGGAGPAGR	A[+42]AAAASGAGGVAVAGAGGAGPAGR	23.02	70703	16
101_130_BN017.wiff	Library Peptides		AAAAASGAGGVAVAGAGGAGPAGR	A[+42]AAAASGAGGVAVAGAGGAGPAGR	23.11	108956	17
101_130_BN018.wiff	Library Peptides		AAAAASGAGGVAVAGAGGAGPAGR	A[+42]AAAASGAGGVAVAGAGGAGPAGR	23.12	124731	18
101_130_BN019.wiff	Library Peptides		AAAAASGAGGVAVAGAGGAGPAGR	A[+42]AAAASGAGGVAVAGAGGAGPAGR	23.16	93125	19
101_130_BN020.wiff	Library Peptides		AAAAASGAGGVAVAGAGGAGPAGR	A[+42]AAAASGAGGVAVAGAGGAGPAGR	23.06	102706	20
101_130_BN021.wiff	Library Peptides		AAAAASGAGGVAVAGAGGAGPAGR	A[+42]AAAASGAGGVAVAGAGGAGPAGR	23.14	89930	21
101_130_BN022.wiff	Library Peptides		AAAAASGAGGVAVAGAGGAGPAGR	A[+42]AAAASGAGGVAVAGAGGAGPAGR	23.08	56986	22
101_130_BN023.wiff	Library Peptides		AAAAASGAGGVAVAGAGGAGPAGR	A[+42]AAAASGAGGVAVAGAGGAGPAGR	23.02	45408	23
101_130_BN024.wiff	Library Peptides		AAAAASGAGGVAVAGAGGAGPAGR	A[+42]AAAASGAGGVAVAGAGGAGPAGR	23.08	49350	24
101_130_BN025.wiff	Library Peptides		AAAAASGAGGVAVAGAGGAGPAGR	A[+42]AAAASGAGGVAVAGAGGAGPAGR	23.05	39072	25
101_130_BN026.wiff	Library Peptides		AAAAASGAGGVAVAGAGGAGPAGR	A[+42]AAAASGAGGVAVAGAGGAGPAGR	23.15	39948	26
101_130_BN027.wiff	Library Peptides		AAAAASGAGGVAVAGAGGAGPAGR	A[+42]AAAASGAGGVAVAGAGGAGPAGR	23.07	26631	27
101_130_BN028.wiff	Library Peptides		AAAAASGAGGVAVAGAGGAGPAGR	A[+42]AAAASGAGGVAVAGAGGAGPAGR	23.06	28073	28
101_130_BN029.wiff	Library Peptides		AAAAASGAGGVAVAGAGGAGPAGR	A[+42]AAAASGAGGVAVAGAGGAGPAGR	22.99	11954	29
101_130_BN030.wiff	Library Peptides		AAAAASGAGGVAVAGAGGAGPAGR	A[+42]AAAASGAGGVAVAGAGGAGPAGR	22.92	13020	30
101_130_BN001.wiff	Library Peptides		AAAQLLQSQAQQSGAQQTK	AAAQLLQSQAQQSGAQQTK	17.94	42	1
101_130_BN002.wiff	Library Peptides		AAAQLLQSQAQQSGAQQTK	AAAQLLQSQAQQSGAQQTK	18.26	36	2
101_130_BN003.wiff	Library Peptides		AAAQLLQSQAQQSGAQQTK	AAAQLLQSQAQQSGAQQTK	18.12	97	3
101_130_BN004.wiff	Library Peptides		AAAQLLQSQAQQSGAQQTK	AAAQLLQSQAQQSGAQQTK	17.96	161	4
101_130_BN005.wiff	Library Peptides		AAAQLLQSQAQQSGAQQTK	AAAQLLQSQAQQSGAQQTK	18	433	5
101_130_BN006.wiff	Library Peptides		AAAQLLQSQAQQSGAQQTK	AAAQLLQSQAQQSGAQQTK	18.14	183	6
101_130_BN007.wiff	Library Peptides		AAAQLLQSQAQQSGAQQTK	AAAQLLQSQAQQSGAQQTK	17.78	862	7
101_130_BN008.wiff	Library Peptides		AAAQLLQSQAQQSGAQQTK	AAAQLLQSQAQQSGAQQTK	17.92	808	8
101_130_BN009.wiff	Library Peptides		AAAQLLQSQAQQSGAQQTK	AAAQLLQSQAQQSGAQQTK	17.88	965	9
101_130_BN010.wiff	Library Peptides		AAAQLLQSQAQQSGAQQTK	AAAQLLQSQAQQSGAQQTK	17.77	1247	10
101_130_BN011.wiff	Library Peptides		AAAQLLQSQAQQSGAQQTK	AAAQLLQSQAQQSGAQQTK	17.83	467	11
101_130_BN012.wiff	Library Peptides		AAAQLLQSQAQQSGAQQTK	AAAQLLQSQAQQSGAQQTK	17.81	399	12
101_130_BN013.wiff	Library Peptides		AAAQLLQSQAQQSGAQQTK	AAAQLLQSQAQQSGAQQTK	17.5	1391	13
101_130_BN014.wiff	Library Peptides		AAAQLLQSQAQQSGAQQTK	AAAQLLQSQAQQSGAQQTK	17.8	270	14
101_130_BN015.wiff	Library Peptides		AAAQLLQSQAQQSGAQQTK	AAAQLLQSQAQQSGAQQTK	17.75	447	15
101_130_BN016.wiff	Library Peptides		AAAQLLQSQAQQSGAQQTK	AAAQLLQSQAQQSGAQQTK	17.89	710	16
101_130_BN017.wiff	Library Peptides		AAAQLLQSQAQQSGAQQTK	AAAQLLQSQAQQSGAQQTK	18	135	17
101_130_BN018.wiff	Library Peptides		AAAQLLQSQAQQSGAQQTK	AAAQLLQSQAQQSGAQQTK	18.03	1031	18
101_130_BN019.wiff	Library Peptides		AAAQLLQSQAQQSGAQQTK	AAAQLLQSQAQQSGAQQTK	18.1	769	19
101_130_BN020.wiff	Library Peptides		AAAQLLQSQAQQSGAQQTK	AAAQLLQSQAQQSGAQQTK	18.05	967	20
101_130_BN021.wiff	Library Peptides		AAAQLLQSQAQQSGAQQTK	AAAQLLQSQAQQSGAQQTK	18	2406	21
101_130_BN022.wiff	Library Peptides		AAAQLLQSQAQQSGAQQTK	AAAQLLQSQAQQSGAQQTK	17.99	2594	22
101_130_BN023.wiff	Library Peptides		AAAQLLQSQAQQSGAQQTK	AAAQLLQSQAQQSGAQQTK	18	1180	23
101_130_BN024.wiff	Library Peptides		AAAQLLQSQAQQSGAQQTK	AAAQLLQSQAQQSGAQQTK	18.05	1516	24
101_130_BN025.wiff	Library Peptides		AAAQLLQSQAQQSGAQQTK	AAAQLLQSQAQQSGAQQTK	18.05	930	25
101_130_BN026.wiff	Library Peptides		AAAQLLQSQAQQSGAQQTK	AAAQLLQSQAQQSGAQQTK	17.7	74	26
101_130_BN027.wiff	Library Peptides		AAAQLLQSQAQQSGAQQTK	AAAQLLQSQAQQSGAQQTK	18.14	129	27
101_130_BN028.wiff	Library Peptides		AAAQLLQSQAQQSGAQQTK	AAAQLLQSQAQQSGAQQTK	18.01	2751	28
101_130_BN029.wiff	Library Peptides		AAAQLLQSQAQQSGAQQTK	AAAQLLQSQAQQSGAQQTK	17.95	3377	29
101_130_BN030.wiff	Library Peptides		AAAQLLQSQAQQSGAQQTK	AAAQLLQSQAQQSGAQQTK	17.74	9922	30
101_130_BN001.wiff	Library Peptides		AAGAEEYAQQEVVK	AAGAEEYAQQEVVK	18.87	115	1
101_130_BN002.wiff	Library Peptides		AAGAEEYAQQEVVK	AAGAEEYAQQEVVK	18.84	572	2
101_130_BN003.wiff	Library Peptides		AAGAEEYAQQEVVK	AAGAEEYAQQEVVK	19.01	100	3
101_130_BN004.wiff	Library Peptides		AAGAEEYAQQEVVK	AAGAEEYAQQEVVK	18.92	131	4
101_130_BN005.wiff	Library Peptides		AAGAEEYAQQEVVK	AAGAEEYAQQEVVK	18.88	882	5
101_130_BN006.wiff	Library Peptides		AAGAEEYAQQEVVK	AAGAEEYAQQEVVK	18.8	1265	6
101_130_BN007.wiff	Library Peptides		AAGAEEYAQQEVVK	AAGAEEYAQQEVVK	18.68	1533	7
101_130_BN008.wiff	Library Peptides		AAGAEEYAQQEVVK	AAGAEEYAQQEVVK	18.65	4145	8
101_130_BN009.wiff	Library Peptides		AAGAEEYAQQEVVK	AAGAEEYAQQEVVK	18.64	1607	9
101_130_BN010.wiff	Library Peptides		AAGAEEYAQQEVVK	AAGAEEYAQQEVVK	18.63	2004	10
101_130_BN011.wiff	Library Peptides		AAGAEEYAQQEVVK	AAGAEEYAQQEVVK	18.68	2128	11
101_130_BN012.wiff	Library Peptides		AAGAEEYAQQEVVK	AAGAEEYAQQEVVK	18.71	1176	12
101_130_BN013.wiff	Library Peptides		AAGAEEYAQQEVVK	AAGAEEYAQQEVVK	18.7	1998	13
101_130_BN014.wiff	Library Peptides		AAGAEEYAQQEVVK	AAGAEEYAQQEVVK	18.64	1840	14
101_130_BN015.wiff	Library Peptides		AAGAEEYAQQEVVK	AAGAEEYAQQEVVK	18.65	1623	15
101_130_BN016.wiff	Library Peptides		AAGAEEYAQQEVVK	AAGAEEYAQQEVVK	18.76	1127	16
101_130_BN017.wiff	Library Peptides		AAGAEEYAQQEVVK	AAGAEEYAQQEVVK	18.86	1714	17
101_130_BN018.wiff	Library Peptides		AAGAEEYAQQEVVK	AAGAEEYAQQEVVK	18.89	2594	18
101_130_BN019.wiff	Library Peptides		AAGAEEYAQQEVVK	AAGAEEYAQQEVVK	18.94	1853	19
101_130_BN020.wiff	Library Peptides		AAGAEEYAQQEVVK	AAGAEEYAQQEVVK	18.89	3000	20
101_130_BN021.wiff	Library Peptides		AAGAEEYAQQEVVK	AAGAEEYAQQEVVK	18.91	6275	21
101_130_BN022.wiff	Library Peptides		AAGAEEYAQQEVVK	AAGAEEYAQQEVVK	18.91	5847	22
101_130_BN023.wiff	Library Peptides		AAGAEEYAQQEVVK	AAGAEEYAQQEVVK	18.87	6991	23
101_130_BN024.wiff	Library Peptides		AAGAEEYAQQEVVK	AAGAEEYAQQEVVK	18.93	9589	24
101_130_BN025.wiff	Library Peptides		AAGAEEYAQQEVVK	AAGAEEYAQQEVVK	18.96	9911	25
101_130_BN026.wiff	Library Peptides		AAGAEEYAQQEVVK	AAGAEEYAQQEVVK	18.58	7074	26
101_130_BN027.wiff	Library Peptides		AAGAEEYAQQEVVK	AAGAEEYAQQEVVK	18.59	5667	27
101_130_BN028.wiff	Library Peptides		AAGAEEYAQQEVVK	AAGAEEYAQQEVVK	18.9	14712	28
101_130_BN029.wiff	Library Peptides		AAGAEEYAQQEVVK	AAGAEEYAQQEVVK	18.87	9803	29
101_130_BN030.wiff	Library Peptides		AAGAEEYAQQEVVK	AAGAEEYAQQEVVK	18.64	15779	30
101_130_BN001.wiff	Library Peptides		AAGAEEYAQQEVVKR	AAGAEEYAQQEVVKR	16.8	66	1
101_130_BN002.wiff	Library Peptides		AAGAEEYAQQEVVKR	AAGAEEYAQQEVVKR	17.04	207	2
101_130_BN003.wiff	Library Peptides		AAGAEEYAQQEVVKR	AAGAEEYAQQEVVKR	17.14	224	3
101_130_BN004.wiff	Library Peptides		AAGAEEYAQQEVVKR	AAGAEEYAQQEVVKR	17.16	679	4
101_130_BN005.wiff	Library Peptides		AAGAEEYAQQEVVKR	AAGAEEYAQQEVVKR	17.16	431	5
101_130_BN006.wiff	Library Peptides		AAGAEEYAQQEVVKR	AAGAEEYAQQEVVKR	17.07	1377	6
101_130_BN007.wiff	Library Peptides		AAGAEEYAQQEVVKR	AAGAEEYAQQEVVKR	16.97	1972	7
101_130_BN008.wiff	Library Peptides		AAGAEEYAQQEVVKR	AAGAEEYAQQEVVKR	16.94	3190	8
101_130_BN009.wiff	Library Peptides		AAGAEEYAQQEVVKR	AAGAEEYAQQEVVKR	16.91	1262	9
101_130_BN010.wiff	Library Peptides		AAGAEEYAQQEVVKR	AAGAEEYAQQEVVKR	16.9	1298	10
101_130_BN011.wiff	Library Peptides		AAGAEEYAQQEVVKR	AAGAEEYAQQEVVKR	16.98	1988	11
101_130_BN012.wiff	Library Peptides		AAGAEEYAQQEVVKR	AAGAEEYAQQEVVKR	16.99	1224	12
101_130_BN013.wiff	Library Peptides		AAGAEEYAQQEVVKR	AAGAEEYAQQEVVKR	16.94	2970	13
101_130_BN014.wiff	Library Peptides		AAGAEEYAQQEVVKR	AAGAEEYAQQEVVKR	16.9	1631	14
101_130_BN015.wiff	Library Peptides		AAGAEEYAQQEVVKR	AAGAEEYAQQEVVKR	16.92	1706	15
101_130_BN016.wiff	Library Peptides		AAGAEEYAQQEVVKR	AAGAEEYAQQEVVKR	17.07	1154	16
101_130_BN017.wiff	Library Peptides		AAGAEEYAQQEVVKR	AAGAEEYAQQEVVKR	17.16	2598	17
101_130_BN018.wiff	Library Peptides		AAGAEEYAQQEVVKR	AAGAEEYAQQEVVKR	17.2	1601	18
101_130_BN019.wiff	Library Peptides		AAGAEEYAQQEVVKR	AAGAEEYAQQEVVKR	17.26	1143	19
101_130_BN020.wiff	Library Peptides		AAGAEEYAQQEVVKR	AAGAEEYAQQEVVKR	17.21	2260	20
101_130_BN021.wiff	Library Peptides		AAGAEEYAQQEVVKR	AAGAEEYAQQEVVKR	17.11	1319	21
101_130_BN022.wiff	Library Peptides		AAGAEEYAQQEVVKR	AAGAEEYAQQEVVKR	17.19	4125	22
101_130_BN023.wiff	Library Peptides		AAGAEEYAQQEVVKR	AAGAEEYAQQEVVKR	17.18	3567	23
101_130_BN024.wiff	Library Peptides		AAGAEEYAQQEVVKR	AAGAEEYAQQEVVKR	17.19	3503	24
101_130_BN025.wiff	Library Peptides		AAGAEEYAQQEVVKR	AAGAEEYAQQEVVKR	17.14	348	25
101_130_BN026.wiff	Library Peptides		AAGAEEYAQQEVVKR	AAGAEEYAQQEVVKR	16.8	126	26
101_130_BN027.wiff	Library Peptides		AAGAEEYAQQEVVKR	AAGAEEYAQQEVVKR	17.01	57	27
101_130_BN028.wiff	Library Peptides		AAGAEEYAQQEVVKR	AAGAEEYAQQEVVKR	17.18	16355	28
101_130_BN029.wiff	Library Peptides		AAGAEEYAQQEVVKR	AAGAEEYAQQEVVKR	17.15	6440	29
101_130_BN030.wiff	Library Peptides		AAGAEEYAQQEVVKR	AAGAEEYAQQEVVKR	16.92	5983	30
101_130_BN001.wiff	Library Peptides		AAGVAAWLPFAR	A[+42]AGVAAWLPFAR	43.12	23423	1
101_130_BN002.wiff	Library Peptides		AAGVAAWLPFAR	A[+42]AGVAAWLPFAR	42.9	41120	2
101_130_BN003.wiff	Library Peptides		AAGVAAWLPFAR	A[+42]AGVAAWLPFAR	42.07	17142	3
101_130_BN004.wiff	Library Peptides		AAGVAAWLPFAR	A[+42]AGVAAWLPFAR	42.62	135651	4
101_130_BN005.wiff	Library Peptides		AAGVAAWLPFAR	A[+42]AGVAAWLPFAR	42.09	30977	5
101_130_BN006.wiff	Library Peptides		AAGVAAWLPFAR	A[+42]AGVAAWLPFAR	41.23	10112	6
101_130_BN007.wiff	Library Peptides		AAGVAAWLPFAR	A[+42]AGVAAWLPFAR	41.39	22254	7
101_130_BN008.wiff	Library Peptides		AAGVAAWLPFAR	A[+42]AGVAAWLPFAR	41.38	32727	8
101_130_BN009.wiff	Library Peptides		AAGVAAWLPFAR	A[+42]AGVAAWLPFAR	41.34	37920	9
101_130_BN010.wiff	Library Peptides		AAGVAAWLPFAR	A[+42]AGVAAWLPFAR	41.78	17476	10
101_130_BN011.wiff	Library Peptides		AAGVAAWLPFAR	A[+42]AGVAAWLPFAR	41.38	17396	11
101_130_BN012.wiff	Library Peptides		AAGVAAWLPFAR	A[+42]AGVAAWLPFAR	42.05	42649	12
101_130_BN013.wiff	Library Peptides		AAGVAAWLPFAR	A[+42]AGVAAWLPFAR	42.66	154144	13
101_130_BN014.wiff	Library Peptides		AAGVAAWLPFAR	A[+42]AGVAAWLPFAR	41.18	5751	14
101_130_BN015.wiff	Library Peptides		AAGVAAWLPFAR	A[+42]AGVAAWLPFAR	42.36	72200	15
101_130_BN016.wiff	Library Peptides		AAGVAAWLPFAR	A[+42]AGVAAWLPFAR	41.34	6749	16
101_130_BN017.wiff	Library Peptides		AAGVAAWLPFAR	A[+42]AGVAAWLPFAR	42.74	119759	17
101_130_BN018.wiff	Library Peptides		AAGVAAWLPFAR	A[+42]AGVAAWLPFAR	42.87	123993	18
101_130_BN019.wiff	Library Peptides		AAGVAAWLPFAR	A[+42]AGVAAWLPFAR	42.7	123566	19
101_130_BN020.wiff	Library Peptides		AAGVAAWLPFAR	A[+42]AGVAAWLPFAR	41.72	10592	20
101_130_BN021.wiff	Library Peptides		AAGVAAWLPFAR	A[+42]AGVAAWLPFAR	41.47	16592	21
101_130_BN022.wiff	Library Peptides		AAGVAAWLPFAR	A[+42]AGVAAWLPFAR	41.52	39374	22
101_130_BN023.wiff	Library Peptides		AAGVAAWLPFAR	A[+42]AGVAAWLPFAR	41.89	21353	23
101_130_BN024.wiff	Library Peptides		AAGVAAWLPFAR	A[+42]AGVAAWLPFAR	41.99	13584	24
101_130_BN025.wiff	Library Peptides		AAGVAAWLPFAR	A[+42]AGVAAWLPFAR	42.75	32598	25
101_130_BN026.wiff	Library Peptides		AAGVAAWLPFAR	A[+42]AGVAAWLPFAR	46.21	8483	26
101_130_BN027.wiff	Library Peptides		AAGVAAWLPFAR	A[+42]AGVAAWLPFAR	45.72	8481	27
101_130_BN028.wiff	Library Peptides		AAGVAAWLPFAR	A[+42]AGVAAWLPFAR	42.22	24507	28
101_130_BN029.wiff	Library Peptides		AAGVAAWLPFAR	A[+42]AGVAAWLPFAR	41.18	5905	29
101_130_BN030.wiff	Library Peptides		AAGVAAWLPFAR	A[+42]AGVAAWLPFAR	40.94	17093	30
101_130_BN001.wiff	Library Peptides		AAGVEAAAEVAATEPK	A[+42]AGVEAAAEVAATEPK	32.5	4674	1
101_130_BN002.wiff	Library Peptides		AAGVEAAAEVAATEPK	A[+42]AGVEAAAEVAATEPK	32.07	2892	2
101_130_BN003.wiff	Library Peptides		AAGVEAAAEVAATEPK	A[+42]AGVEAAAEVAATEPK	32.37	3671	3
101_130_BN004.wiff	Library Peptides		AAGVEAAAEVAATEPK	A[+42]AGVEAAAEVAATEPK	32.14	4468	4
101_130_BN005.wiff	Library Peptides		AAGVEAAAEVAATEPK	A[+42]AGVEAAAEVAATEPK	31.33	38018	5
101_130_BN006.wiff	Library Peptides		AAGVEAAAEVAATEPK	A[+42]AGVEAAAEVAATEPK	32.01	7206	6
101_130_BN007.wiff	Library Peptides		AAGVEAAAEVAATEPK	A[+42]AGVEAAAEVAATEPK	30.08	7230	7
101_130_BN008.wiff	Library Peptides		AAGVEAAAEVAATEPK	A[+42]AGVEAAAEVAATEPK	31.71	40383	8
101_130_BN009.wiff	Library Peptides		AAGVEAAAEVAATEPK	A[+42]AGVEAAAEVAATEPK	31.67	41143	9
101_130_BN010.wiff	Library Peptides		AAGVEAAAEVAATEPK	A[+42]AGVEAAAEVAATEPK	31.73	106550	10
101_130_BN011.wiff	Library Peptides		AAGVEAAAEVAATEPK	A[+42]AGVEAAAEVAATEPK	31.74	118618	11
101_130_BN012.wiff	Library Peptides		AAGVEAAAEVAATEPK	A[+42]AGVEAAAEVAATEPK	31.68	91463	12
101_130_BN013.wiff	Library Peptides		AAGVEAAAEVAATEPK	A[+42]AGVEAAAEVAATEPK	31.66	132641	13
101_130_BN014.wiff	Library Peptides		AAGVEAAAEVAATEPK	A[+42]AGVEAAAEVAATEPK	31.62	138849	14
101_130_BN015.wiff	Library Peptides		AAGVEAAAEVAATEPK	A[+42]AGVEAAAEVAATEPK	31.75	116000	15
101_130_BN016.wiff	Library Peptides		AAGVEAAAEVAATEPK	A[+42]AGVEAAAEVAATEPK	31.75	163022	16
101_130_BN017.wiff	Library Peptides		AAGVEAAAEVAATEPK	A[+42]AGVEAAAEVAATEPK	31.88	229030	17
101_130_BN018.wiff	Library Peptides		AAGVEAAAEVAATEPK	A[+42]AGVEAAAEVAATEPK	31.95	341464	18
101_130_BN019.wiff	Library Peptides		AAGVEAAAEVAATEPK	A[+42]AGVEAAAEVAATEPK	31.97	212656	19
101_130_BN020.wiff	Library Peptides		AAGVEAAAEVAATEPK	A[+42]AGVEAAAEVAATEPK	31.85	212226	20
101_130_BN021.wiff	Library Peptides		AAGVEAAAEVAATEPK	A[+42]AGVEAAAEVAATEPK	31.85	225416	21
101_130_BN022.wiff	Library Peptides		AAGVEAAAEVAATEPK	A[+42]AGVEAAAEVAATEPK	31.86	154481	22
101_130_BN023.wiff	Library Peptides		AAGVEAAAEVAATEPK	A[+42]AGVEAAAEVAATEPK	31.85	166547	23
101_130_BN024.wiff	Library Peptides		AAGVEAAAEVAATEPK	A[+42]AGVEAAAEVAATEPK	31.94	206854	24
101_130_BN025.wiff	Library Peptides		AAGVEAAAEVAATEPK	A[+42]AGVEAAAEVAATEPK	31.93	247418	25
101_130_BN026.wiff	Library Peptides		AAGVEAAAEVAATEPK	A[+42]AGVEAAAEVAATEPK	32.23	284619	26
101_130_BN027.wiff	Library Peptides		AAGVEAAAEVAATEPK	A[+42]AGVEAAAEVAATEPK	32.14	217683	27
101_130_BN028.wiff	Library Peptides		AAGVEAAAEVAATEPK	A[+42]AGVEAAAEVAATEPK	31.91	188890	28
101_130_BN029.wiff	Library Peptides		AAGVEAAAEVAATEPK	A[+42]AGVEAAAEVAATEPK	31.81	118263	29
101_130_BN030.wiff	Library Peptides		AAGVEAAAEVAATEPK	A[+42]AGVEAAAEVAATEPK	31.58	148445	30
101_130_BN001.wiff	Library Peptides		AAIDWFDGKEFSGNPIK	AAIDWFDGKEFSGNPIK	34.69	844	1
101_130_BN002.wiff	Library Peptides		AAIDWFDGKEFSGNPIK	AAIDWFDGKEFSGNPIK	34.93	8037	2
101_130_BN003.wiff	Library Peptides		AAIDWFDGKEFSGNPIK	AAIDWFDGKEFSGNPIK	34.26	3034	3
101_130_BN004.wiff	Library Peptides		AAIDWFDGKEFSGNPIK	AAIDWFDGKEFSGNPIK	33.94	970	4
101_130_BN005.wiff	Library Peptides		AAIDWFDGKEFSGNPIK	AAIDWFDGKEFSGNPIK	33.99	924	5
101_130_BN006.wiff	Library Peptides		AAIDWFDGKEFSGNPIK	AAIDWFDGKEFSGNPIK	33.66	14471	6
101_130_BN007.wiff	Library Peptides		AAIDWFDGKEFSGNPIK	AAIDWFDGKEFSGNPIK	33.57	30489	7
101_130_BN008.wiff	Library Peptides		AAIDWFDGKEFSGNPIK	AAIDWFDGKEFSGNPIK	33.56	34733	8
101_130_BN009.wiff	Library Peptides		AAIDWFDGKEFSGNPIK	AAIDWFDGKEFSGNPIK	33.49	15563	9
101_130_BN010.wiff	Library Peptides		AAIDWFDGKEFSGNPIK	AAIDWFDGKEFSGNPIK	33.6	18196	10
101_130_BN011.wiff	Library Peptides		AAIDWFDGKEFSGNPIK	AAIDWFDGKEFSGNPIK	33.54	8086	11
101_130_BN012.wiff	Library Peptides		AAIDWFDGKEFSGNPIK	AAIDWFDGKEFSGNPIK	33.57	3614	12
101_130_BN013.wiff	Library Peptides		AAIDWFDGKEFSGNPIK	AAIDWFDGKEFSGNPIK	33.55	12116	13
101_130_BN014.wiff	Library Peptides		AAIDWFDGKEFSGNPIK	AAIDWFDGKEFSGNPIK	33.51	7066	14
101_130_BN015.wiff	Library Peptides		AAIDWFDGKEFSGNPIK	AAIDWFDGKEFSGNPIK	33.39	5732	15
101_130_BN016.wiff	Library Peptides		AAIDWFDGKEFSGNPIK	AAIDWFDGKEFSGNPIK	33.66	4965	16
101_130_BN017.wiff	Library Peptides		AAIDWFDGKEFSGNPIK	AAIDWFDGKEFSGNPIK	33.84	5150	17
101_130_BN018.wiff	Library Peptides		AAIDWFDGKEFSGNPIK	AAIDWFDGKEFSGNPIK	33.78	7209	18
101_130_BN019.wiff	Library Peptides		AAIDWFDGKEFSGNPIK	AAIDWFDGKEFSGNPIK	33.77	5003	19
101_130_BN020.wiff	Library Peptides		AAIDWFDGKEFSGNPIK	AAIDWFDGKEFSGNPIK	33.67	13313	20
101_130_BN021.wiff	Library Peptides		AAIDWFDGKEFSGNPIK	AAIDWFDGKEFSGNPIK	33.76	4701	21
101_130_BN022.wiff	Library Peptides		AAIDWFDGKEFSGNPIK	AAIDWFDGKEFSGNPIK	33.69	3290	22
101_130_BN023.wiff	Library Peptides		AAIDWFDGKEFSGNPIK	AAIDWFDGKEFSGNPIK	33.63	9638	23
101_130_BN024.wiff	Library Peptides		AAIDWFDGKEFSGNPIK	AAIDWFDGKEFSGNPIK	34.53	6686	24
101_130_BN025.wiff	Library Peptides		AAIDWFDGKEFSGNPIK	AAIDWFDGKEFSGNPIK	35.1	22054	25
101_130_BN026.wiff	Library Peptides		AAIDWFDGKEFSGNPIK	AAIDWFDGKEFSGNPIK	36.29	5598	26
101_130_BN027.wiff	Library Peptides		AAIDWFDGKEFSGNPIK	AAIDWFDGKEFSGNPIK	35.91	6005	27
101_130_BN028.wiff	Library Peptides		AAIDWFDGKEFSGNPIK	AAIDWFDGKEFSGNPIK	33.67	11096	28
101_130_BN029.wiff	Library Peptides		AAIDWFDGKEFSGNPIK	AAIDWFDGKEFSGNPIK	33.72	9325	29
101_130_BN030.wiff	Library Peptides		AAIDWFDGKEFSGNPIK	AAIDWFDGKEFSGNPIK	33.34	10228	30
101_130_BN001.wiff	Library Peptides		AAKPGANSTTDAVLLNK	AAKPGANSTTDAVLLNK	18.07	43	1
101_130_BN002.wiff	Library Peptides		AAKPGANSTTDAVLLNK	AAKPGANSTTDAVLLNK	18.53	70	2
101_130_BN003.wiff	Library Peptides		AAKPGANSTTDAVLLNK	AAKPGANSTTDAVLLNK	18.42	99	3
101_130_BN004.wiff	Library Peptides		AAKPGANSTTDAVLLNK	AAKPGANSTTDAVLLNK	18.29	106	4
101_130_BN005.wiff	Library Peptides		AAKPGANSTTDAVLLNK	AAKPGANSTTDAVLLNK	18.4	132	5
101_130_BN006.wiff	Library Peptides		AAKPGANSTTDAVLLNK	AAKPGANSTTDAVLLNK	18.29	171	6
101_130_BN007.wiff	Library Peptides		AAKPGANSTTDAVLLNK	AAKPGANSTTDAVLLNK	18.07	1086	7
101_130_BN008.wiff	Library Peptides		AAKPGANSTTDAVLLNK	AAKPGANSTTDAVLLNK	18.14	396	8
101_130_BN009.wiff	Library Peptides		AAKPGANSTTDAVLLNK	AAKPGANSTTDAVLLNK	18.14	279	9
101_130_BN010.wiff	Library Peptides		AAKPGANSTTDAVLLNK	AAKPGANSTTDAVLLNK	18.71	5433	10
101_130_BN011.wiff	Library Peptides		AAKPGANSTTDAVLLNK	AAKPGANSTTDAVLLNK	17.89	1011	11
101_130_BN012.wiff	Library Peptides		AAKPGANSTTDAVLLNK	AAKPGANSTTDAVLLNK	17.99	731	12
101_130_BN013.wiff	Library Peptides		AAKPGANSTTDAVLLNK	AAKPGANSTTDAVLLNK	18.14	535	13
101_130_BN014.wiff	Library Peptides		AAKPGANSTTDAVLLNK	AAKPGANSTTDAVLLNK	18.08	144	14
101_130_BN015.wiff	Library Peptides		AAKPGANSTTDAVLLNK	AAKPGANSTTDAVLLNK	18.19	462	15
101_130_BN016.wiff	Library Peptides		AAKPGANSTTDAVLLNK	AAKPGANSTTDAVLLNK	18.25	279	16
101_130_BN017.wiff	Library Peptides		AAKPGANSTTDAVLLNK	AAKPGANSTTDAVLLNK	18.4	226	17
101_130_BN018.wiff	Library Peptides		AAKPGANSTTDAVLLNK	AAKPGANSTTDAVLLNK	18.37	553	18
101_130_BN019.wiff	Library Peptides		AAKPGANSTTDAVLLNK	AAKPGANSTTDAVLLNK	18.46	752	19
101_130_BN020.wiff	Library Peptides		AAKPGANSTTDAVLLNK	AAKPGANSTTDAVLLNK	18.38	1540	20
101_130_BN021.wiff	Library Peptides		AAKPGANSTTDAVLLNK	AAKPGANSTTDAVLLNK	18.64	1855	21
101_130_BN022.wiff	Library Peptides		AAKPGANSTTDAVLLNK	AAKPGANSTTDAVLLNK	18.45	984	22
101_130_BN023.wiff	Library Peptides		AAKPGANSTTDAVLLNK	AAKPGANSTTDAVLLNK	18.41	773	23
101_130_BN024.wiff	Library Peptides		AAKPGANSTTDAVLLNK	AAKPGANSTTDAVLLNK	18.45	1333	24
101_130_BN025.wiff	Library Peptides		AAKPGANSTTDAVLLNK	AAKPGANSTTDAVLLNK	18.33	361	25
101_130_BN026.wiff	Library Peptides		AAKPGANSTTDAVLLNK	AAKPGANSTTDAVLLNK	18.2	315	26
101_130_BN027.wiff	Library Peptides		AAKPGANSTTDAVLLNK	AAKPGANSTTDAVLLNK	18.46	85	27
101_130_BN028.wiff	Library Peptides		AAKPGANSTTDAVLLNK	AAKPGANSTTDAVLLNK	18.45	33403	28
101_130_BN029.wiff	Library Peptides		AAKPGANSTTDAVLLNK	AAKPGANSTTDAVLLNK	18.36	12172	29
101_130_BN030.wiff	Library Peptides		AAKPGANSTTDAVLLNK	AAKPGANSTTDAVLLNK	17.99	11746	30
101_130_BN001.wiff	Library Peptides		AAPAAAAAMAPPGPR	AAPAAAAAMAPPGPR	19.36	455	1
101_130_BN002.wiff	Library Peptides		AAPAAAAAMAPPGPR	AAPAAAAAMAPPGPR	19.76	197	2
101_130_BN003.wiff	Library Peptides		AAPAAAAAMAPPGPR	AAPAAAAAMAPPGPR	19.73	178	3
101_130_BN004.wiff	Library Peptides		AAPAAAAAMAPPGPR	AAPAAAAAMAPPGPR	19.58	682	4
101_130_BN005.wiff	Library Peptides		AAPAAAAAMAPPGPR	AAPAAAAAMAPPGPR	19.69	898	5
101_130_BN006.wiff	Library Peptides		AAPAAAAAMAPPGPR	AAPAAAAAMAPPGPR	20.15	2186	6
101_130_BN007.wiff	Library Peptides		AAPAAAAAMAPPGPR	AAPAAAAAMAPPGPR	19.42	2231	7
101_130_BN008.wiff	Library Peptides		AAPAAAAAMAPPGPR	AAPAAAAAMAPPGPR	19.35	4471	8
101_130_BN009.wiff	Library Peptides		AAPAAAAAMAPPGPR	AAPAAAAAMAPPGPR	19.35	2307	9
101_130_BN010.wiff	Library Peptides		AAPAAAAAMAPPGPR	AAPAAAAAMAPPGPR	19.3	3445	10
101_130_BN011.wiff	Library Peptides		AAPAAAAAMAPPGPR	AAPAAAAAMAPPGPR	19.35	1996	11
101_130_BN012.wiff	Library Peptides		AAPAAAAAMAPPGPR	AAPAAAAAMAPPGPR	19.41	1352	12
101_130_BN013.wiff	Library Peptides		AAPAAAAAMAPPGPR	AAPAAAAAMAPPGPR	19.39	1917	13
101_130_BN014.wiff	Library Peptides		AAPAAAAAMAPPGPR	AAPAAAAAMAPPGPR	19.29	619	14
101_130_BN015.wiff	Library Peptides		AAPAAAAAMAPPGPR	AAPAAAAAMAPPGPR	19.61	1544	15
101_130_BN016.wiff	Library Peptides		AAPAAAAAMAPPGPR	AAPAAAAAMAPPGPR	19.45	506	16
101_130_BN017.wiff	Library Peptides		AAPAAAAAMAPPGPR	AAPAAAAAMAPPGPR	19.53	1290	17
101_130_BN018.wiff	Library Peptides		AAPAAAAAMAPPGPR	AAPAAAAAMAPPGPR	19.25	602	18
101_130_BN019.wiff	Library Peptides		AAPAAAAAMAPPGPR	AAPAAAAAMAPPGPR	19.61	915	19
101_130_BN020.wiff	Library Peptides		AAPAAAAAMAPPGPR	AAPAAAAAMAPPGPR	19.78	1882	20
101_130_BN021.wiff	Library Peptides		AAPAAAAAMAPPGPR	AAPAAAAAMAPPGPR	19.53	1753	21
101_130_BN022.wiff	Library Peptides		AAPAAAAAMAPPGPR	AAPAAAAAMAPPGPR	19.56	2742	22
101_130_BN023.wiff	Library Peptides		AAPAAAAAMAPPGPR	AAPAAAAAMAPPGPR	20.01	2016	23
101_130_BN024.wiff	Library Peptides		AAPAAAAAMAPPGPR	AAPAAAAAMAPPGPR	19.77	2169	24
101_130_BN025.wiff	Library Peptides		AAPAAAAAMAPPGPR	AAPAAAAAMAPPGPR	20.38	5816	25
101_130_BN026.wiff	Library Peptides		AAPAAAAAMAPPGPR	AAPAAAAAMAPPGPR	19.44	188	26
101_130_BN027.wiff	Library Peptides		AAPAAAAAMAPPGPR	AAPAAAAAMAPPGPR	19.8	870	27
101_130_BN028.wiff	Library Peptides		AAPAAAAAMAPPGPR	AAPAAAAAMAPPGPR	19.62	13592	28
101_130_BN029.wiff	Library Peptides		AAPAAAAAMAPPGPR	AAPAAAAAMAPPGPR	19.51	134869	29
101_130_BN030.wiff	Library Peptides		AAPAAAAAMAPPGPR	AAPAAAAAMAPPGPR	19.32	16064	30
101_130_BN001.wiff	Library Peptides		AAPAAAAAMAPPGPR	AAPAAAAAM[+16]APPGPR	12.57	28	1
101_130_BN002.wiff	Library Peptides		AAPAAAAAMAPPGPR	AAPAAAAAM[+16]APPGPR	13.37	29	2
101_130_BN003.wiff	Library Peptides		AAPAAAAAMAPPGPR	AAPAAAAAM[+16]APPGPR	13.07	57	3
101_130_BN004.wiff	Library Peptides		AAPAAAAAMAPPGPR	AAPAAAAAM[+16]APPGPR	12.95	29	4
101_130_BN005.wiff	Library Peptides		AAPAAAAAMAPPGPR	AAPAAAAAM[+16]APPGPR	12.93	75	5
101_130_BN006.wiff	Library Peptides		AAPAAAAAMAPPGPR	AAPAAAAAM[+16]APPGPR	13.58	92	6
101_130_BN007.wiff	Library Peptides		AAPAAAAAMAPPGPR	AAPAAAAAM[+16]APPGPR	12.85	142	7
101_130_BN008.wiff	Library Peptides		AAPAAAAAMAPPGPR	AAPAAAAAM[+16]APPGPR	12.79	146	8
101_130_BN009.wiff	Library Peptides		AAPAAAAAMAPPGPR	AAPAAAAAM[+16]APPGPR	12.8	562	9
101_130_BN010.wiff	Library Peptides		AAPAAAAAMAPPGPR	AAPAAAAAM[+16]APPGPR	12.83	112	10
101_130_BN011.wiff	Library Peptides		AAPAAAAAMAPPGPR	AAPAAAAAM[+16]APPGPR	12.93	790	11
101_130_BN012.wiff	Library Peptides		AAPAAAAAMAPPGPR	AAPAAAAAM[+16]APPGPR	12.75	218	12
101_130_BN013.wiff	Library Peptides		AAPAAAAAMAPPGPR	AAPAAAAAM[+16]APPGPR	12.7	671	13
101_130_BN014.wiff	Library Peptides		AAPAAAAAMAPPGPR	AAPAAAAAM[+16]APPGPR	12.75	123	14
101_130_BN015.wiff	Library Peptides		AAPAAAAAMAPPGPR	AAPAAAAAM[+16]APPGPR	12.57	198	15
101_130_BN016.wiff	Library Peptides		AAPAAAAAMAPPGPR	AAPAAAAAM[+16]APPGPR	13.01	564	16
101_130_BN017.wiff	Library Peptides		AAPAAAAAMAPPGPR	AAPAAAAAM[+16]APPGPR	12.86	254	17
101_130_BN018.wiff	Library Peptides		AAPAAAAAMAPPGPR	AAPAAAAAM[+16]APPGPR	12.98	338	18
101_130_BN019.wiff	Library Peptides		AAPAAAAAMAPPGPR	AAPAAAAAM[+16]APPGPR	13.14	1027	19
101_130_BN020.wiff	Library Peptides		AAPAAAAAMAPPGPR	AAPAAAAAM[+16]APPGPR	13.14	634	20
101_130_BN021.wiff	Library Peptides		AAPAAAAAMAPPGPR	AAPAAAAAM[+16]APPGPR	13.22	659	21
101_130_BN022.wiff	Library Peptides		AAPAAAAAMAPPGPR	AAPAAAAAM[+16]APPGPR	13.27	299	22
101_130_BN023.wiff	Library Peptides		AAPAAAAAMAPPGPR	AAPAAAAAM[+16]APPGPR	12.92	268	23
101_130_BN024.wiff	Library Peptides		AAPAAAAAMAPPGPR	AAPAAAAAM[+16]APPGPR	12.87	191	24
101_130_BN025.wiff	Library Peptides		AAPAAAAAMAPPGPR	AAPAAAAAM[+16]APPGPR	12.72	56	25
101_130_BN026.wiff	Library Peptides		AAPAAAAAMAPPGPR	AAPAAAAAM[+16]APPGPR	11.93	31	26
101_130_BN027.wiff	Library Peptides		AAPAAAAAMAPPGPR	AAPAAAAAM[+16]APPGPR	11.89	41	27
101_130_BN028.wiff	Library Peptides		AAPAAAAAMAPPGPR	AAPAAAAAM[+16]APPGPR	13.05	27610	28
101_130_BN029.wiff	Library Peptides		AAPAAAAAMAPPGPR	AAPAAAAAM[+16]APPGPR	12.9	439894	29
101_130_BN030.wiff	Library Peptides		AAPAAAAAMAPPGPR	AAPAAAAAM[+16]APPGPR	12.84	33438	30
101_130_BN001.wiff	Library Peptides		AAPAAAAAMAPPGPR	AAPAAAAAM[+16]APPGPR	12.55	44	1
101_130_BN002.wiff	Library Peptides		AAPAAAAAMAPPGPR	AAPAAAAAM[+16]APPGPR	13.39	57	2
101_130_BN003.wiff	Library Peptides		AAPAAAAAMAPPGPR	AAPAAAAAM[+16]APPGPR	13.06	106	3
101_130_BN004.wiff	Library Peptides		AAPAAAAAMAPPGPR	AAPAAAAAM[+16]APPGPR	12.95	35	4
101_130_BN005.wiff	Library Peptides		AAPAAAAAMAPPGPR	AAPAAAAAM[+16]APPGPR	12.92	169	5
101_130_BN006.wiff	Library Peptides		AAPAAAAAMAPPGPR	AAPAAAAAM[+16]APPGPR	13.58	97	6
101_130_BN007.wiff	Library Peptides		AAPAAAAAMAPPGPR	AAPAAAAAM[+16]APPGPR	12.89	173	7
101_130_BN008.wiff	Library Peptides		AAPAAAAAMAPPGPR	AAPAAAAAM[+16]APPGPR	12.82	224	8
101_130_BN009.wiff	Library Peptides		AAPAAAAAMAPPGPR	AAPAAAAAM[+16]APPGPR	12.76	575	9
101_130_BN010.wiff	Library Peptides		AAPAAAAAMAPPGPR	AAPAAAAAM[+16]APPGPR	12.81	140	10
101_130_BN011.wiff	Library Peptides		AAPAAAAAMAPPGPR	AAPAAAAAM[+16]APPGPR	12.93	578	11
101_130_BN012.wiff	Library Peptides		AAPAAAAAMAPPGPR	AAPAAAAAM[+16]APPGPR	12.71	159	12
101_130_BN013.wiff	Library Peptides		AAPAAAAAMAPPGPR	AAPAAAAAM[+16]APPGPR	12.73	663	13
101_130_BN014.wiff	Library Peptides		AAPAAAAAMAPPGPR	AAPAAAAAM[+16]APPGPR	12.74	208	14
101_130_BN015.wiff	Library Peptides		AAPAAAAAMAPPGPR	AAPAAAAAM[+16]APPGPR	12.57	440	15
101_130_BN016.wiff	Library Peptides		AAPAAAAAMAPPGPR	AAPAAAAAM[+16]APPGPR	12.98	368	16
101_130_BN017.wiff	Library Peptides		AAPAAAAAMAPPGPR	AAPAAAAAM[+16]APPGPR	12.85	193	17
101_130_BN018.wiff	Library Peptides		AAPAAAAAMAPPGPR	AAPAAAAAM[+16]APPGPR	12.98	382	18
101_130_BN019.wiff	Library Peptides		AAPAAAAAMAPPGPR	AAPAAAAAM[+16]APPGPR	13.12	809	19
101_130_BN020.wiff	Library Peptides		AAPAAAAAMAPPGPR	AAPAAAAAM[+16]APPGPR	13.09	524	20
101_130_BN021.wiff	Library Peptides		AAPAAAAAMAPPGPR	AAPAAAAAM[+16]APPGPR	13.21	792	21
101_130_BN022.wiff	Library Peptides		AAPAAAAAMAPPGPR	AAPAAAAAM[+16]APPGPR	13.18	242	22
101_130_BN023.wiff	Library Peptides		AAPAAAAAMAPPGPR	AAPAAAAAM[+16]APPGPR	13	212	23
101_130_BN024.wiff	Library Peptides		AAPAAAAAMAPPGPR	AAPAAAAAM[+16]APPGPR	12.87	106	24
101_130_BN025.wiff	Library Peptides		AAPAAAAAMAPPGPR	AAPAAAAAM[+16]APPGPR	12.76	39	25
101_130_BN026.wiff	Library Peptides		AAPAAAAAMAPPGPR	AAPAAAAAM[+16]APPGPR	11.93	27	26
101_130_BN027.wiff	Library Peptides		AAPAAAAAMAPPGPR	AAPAAAAAM[+16]APPGPR	11.88	23	27
101_130_BN028.wiff	Library Peptides		AAPAAAAAMAPPGPR	AAPAAAAAM[+16]APPGPR	13.04	21958	28
101_130_BN029.wiff	Library Peptides		AAPAAAAAMAPPGPR	AAPAAAAAM[+16]APPGPR	12.9	347765	29
101_130_BN030.wiff	Library Peptides		AAPAAAAAMAPPGPR	AAPAAAAAM[+16]APPGPR	12.84	27326	30
101_130_BN001.wiff	Library Peptides		AAPPPPPPPPPPLGADR	AAPPPPPPPPPPLGADR	22.02	45635	1
101_130_BN002.wiff	Library Peptides		AAPPPPPPPPPPLGADR	AAPPPPPPPPPPLGADR	22.81	383	2
101_130_BN003.wiff	Library Peptides		AAPPPPPPPPPPLGADR	AAPPPPPPPPPPLGADR	22.31	2314	3
101_130_BN004.wiff	Library Peptides		AAPPPPPPPPPPLGADR	AAPPPPPPPPPPLGADR	22.78	1904	4
101_130_BN005.wiff	Library Peptides		AAPPPPPPPPPPLGADR	AAPPPPPPPPPPLGADR	22.48	10431	5
101_130_BN006.wiff	Library Peptides		AAPPPPPPPPPPLGADR	AAPPPPPPPPPPLGADR	22.68	15181	6
101_130_BN007.wiff	Library Peptides		AAPPPPPPPPPPLGADR	AAPPPPPPPPPPLGADR	22.64	46312	7
101_130_BN008.wiff	Library Peptides		AAPPPPPPPPPPLGADR	AAPPPPPPPPPPLGADR	22.51	221837	8
101_130_BN009.wiff	Library Peptides		AAPPPPPPPPPPLGADR	AAPPPPPPPPPPLGADR	22.48	172092	9
101_130_BN010.wiff	Library Peptides		AAPPPPPPPPPPLGADR	AAPPPPPPPPPPLGADR	22.57	104795	10
101_130_BN011.wiff	Library Peptides		AAPPPPPPPPPPLGADR	AAPPPPPPPPPPLGADR	22.64	42367	11
101_130_BN012.wiff	Library Peptides		AAPPPPPPPPPPLGADR	AAPPPPPPPPPPLGADR	22.38	24678	12
101_130_BN013.wiff	Library Peptides		AAPPPPPPPPPPLGADR	AAPPPPPPPPPPLGADR	22.34	32597	13
101_130_BN014.wiff	Library Peptides		AAPPPPPPPPPPLGADR	AAPPPPPPPPPPLGADR	22.32	33562	14
101_130_BN015.wiff	Library Peptides		AAPPPPPPPPPPLGADR	AAPPPPPPPPPPLGADR	22.4	21879	15
101_130_BN016.wiff	Library Peptides		AAPPPPPPPPPPLGADR	AAPPPPPPPPPPLGADR	22.52	22635	16
101_130_BN017.wiff	Library Peptides		AAPPPPPPPPPPLGADR	AAPPPPPPPPPPLGADR	22.58	25298	17
101_130_BN018.wiff	Library Peptides		AAPPPPPPPPPPLGADR	AAPPPPPPPPPPLGADR	22.7	34317	18
101_130_BN019.wiff	Library Peptides		AAPPPPPPPPPPLGADR	AAPPPPPPPPPPLGADR	22.66	23933	19
101_130_BN020.wiff	Library Peptides		AAPPPPPPPPPPLGADR	AAPPPPPPPPPPLGADR	22.62	58584	20
101_130_BN021.wiff	Library Peptides		AAPPPPPPPPPPLGADR	AAPPPPPPPPPPLGADR	22.52	170383	21
101_130_BN022.wiff	Library Peptides		AAPPPPPPPPPPLGADR	AAPPPPPPPPPPLGADR	22.61	129547	22
101_130_BN023.wiff	Library Peptides		AAPPPPPPPPPPLGADR	AAPPPPPPPPPPLGADR	22.5	86515	23
101_130_BN024.wiff	Library Peptides		AAPPPPPPPPPPLGADR	AAPPPPPPPPPPLGADR	22.47	75583	24
101_130_BN025.wiff	Library Peptides		AAPPPPPPPPPPLGADR	AAPPPPPPPPPPLGADR	22.68	64249	25
101_130_BN026.wiff	Library Peptides		AAPPPPPPPPPPLGADR	AAPPPPPPPPPPLGADR	22.91	56446	26
101_130_BN027.wiff	Library Peptides		AAPPPPPPPPPPLGADR	AAPPPPPPPPPPLGADR	22.72	29785	27
101_130_BN028.wiff	Library Peptides		AAPPPPPPPPPPLGADR	AAPPPPPPPPPPLGADR	22.78	20485	28
101_130_BN029.wiff	Library Peptides		AAPPPPPPPPPPLGADR	AAPPPPPPPPPPLGADR	22.13	11028	29
101_130_BN030.wiff	Library Peptides		AAPPPPPPPPPPLGADR	AAPPPPPPPPPPLGADR	22.34	13552	30
101_130_BN001.wiff	Library Peptides		AAPPPPPPPPPPLGADR	AAPPPPPPPPPPLGADR	22.02	15701	1
101_130_BN002.wiff	Library Peptides		AAPPPPPPPPPPLGADR	AAPPPPPPPPPPLGADR	22.82	700	2
101_130_BN003.wiff	Library Peptides		AAPPPPPPPPPPLGADR	AAPPPPPPPPPPLGADR	22.65	4569	3
101_130_BN004.wiff	Library Peptides		AAPPPPPPPPPPLGADR	AAPPPPPPPPPPLGADR	22.57	4789	4
101_130_BN005.wiff	Library Peptides		AAPPPPPPPPPPLGADR	AAPPPPPPPPPPLGADR	22.6	33801	5
101_130_BN006.wiff	Library Peptides		AAPPPPPPPPPPLGADR	AAPPPPPPPPPPLGADR	22.5	50962	6
101_130_BN007.wiff	Library Peptides		AAPPPPPPPPPPLGADR	AAPPPPPPPPPPLGADR	22.37	161917	7
101_130_BN008.wiff	Library Peptides		AAPPPPPPPPPPLGADR	AAPPPPPPPPPPLGADR	22.33	685179	8
101_130_BN009.wiff	Library Peptides		AAPPPPPPPPPPLGADR	AAPPPPPPPPPPLGADR	22.33	537252	9
101_130_BN010.wiff	Library Peptides		AAPPPPPPPPPPLGADR	AAPPPPPPPPPPLGADR	22.3	357621	10
101_130_BN011.wiff	Library Peptides		AAPPPPPPPPPPLGADR	AAPPPPPPPPPPLGADR	22.4	157069	11
101_130_BN012.wiff	Library Peptides		AAPPPPPPPPPPLGADR	AAPPPPPPPPPPLGADR	22.41	78683	12
101_130_BN013.wiff	Library Peptides		AAPPPPPPPPPPLGADR	AAPPPPPPPPPPLGADR	22.31	115724	13
101_130_BN014.wiff	Library Peptides		AAPPPPPPPPPPLGADR	AAPPPPPPPPPPLGADR	22.26	119283	14
101_130_BN015.wiff	Library Peptides		AAPPPPPPPPPPLGADR	AAPPPPPPPPPPLGADR	22.52	70999	15
101_130_BN016.wiff	Library Peptides		AAPPPPPPPPPPLGADR	AAPPPPPPPPPPLGADR	22.46	85881	16
101_130_BN017.wiff	Library Peptides		AAPPPPPPPPPPLGADR	AAPPPPPPPPPPLGADR	22.64	93698	17
101_130_BN018.wiff	Library Peptides		AAPPPPPPPPPPLGADR	AAPPPPPPPPPPLGADR	22.58	110672	18
101_130_BN019.wiff	Library Peptides		AAPPPPPPPPPPLGADR	AAPPPPPPPPPPLGADR	22.62	104423	19
101_130_BN020.wiff	Library Peptides		AAPPPPPPPPPPLGADR	AAPPPPPPPPPPLGADR	22.56	232268	20
101_130_BN021.wiff	Library Peptides		AAPPPPPPPPPPLGADR	AAPPPPPPPPPPLGADR	22.55	555499	21
101_130_BN022.wiff	Library Peptides		AAPPPPPPPPPPLGADR	AAPPPPPPPPPPLGADR	22.55	438523	22
101_130_BN023.wiff	Library Peptides		AAPPPPPPPPPPLGADR	AAPPPPPPPPPPLGADR	22.5	310982	23
101_130_BN024.wiff	Library Peptides		AAPPPPPPPPPPLGADR	AAPPPPPPPPPPLGADR	22.6	262263	24
101_130_BN025.wiff	Library Peptides		AAPPPPPPPPPPLGADR	AAPPPPPPPPPPLGADR	22.78	156281	25
101_130_BN026.wiff	Library Peptides		AAPPPPPPPPPPLGADR	AAPPPPPPPPPPLGADR	22.82	159269	26
101_130_BN027.wiff	Library Peptides		AAPPPPPPPPPPLGADR	AAPPPPPPPPPPLGADR	22.88	98527	27
101_130_BN028.wiff	Library Peptides		AAPPPPPPPPPPLGADR	AAPPPPPPPPPPLGADR	22.72	55685	28
101_130_BN029.wiff	Library Peptides		AAPPPPPPPPPPLGADR	AAPPPPPPPPPPLGADR	22.53	20879	29
101_130_BN030.wiff	Library Peptides		AAPPPPPPPPPPLGADR	AAPPPPPPPPPPLGADR	22.37	30229	30
101_130_BN001.wiff	Library Peptides		AAQLLDVR	AAQLLDVR	23.8	1651984	1
101_130_BN002.wiff	Library Peptides		AAQLLDVR	AAQLLDVR	23.71	1848527	2
101_130_BN003.wiff	Library Peptides		AAQLLDVR	AAQLLDVR	23.7	2124046	3
101_130_BN004.wiff	Library Peptides		AAQLLDVR	AAQLLDVR	23.69	2646002	4
101_130_BN005.wiff	Library Peptides		AAQLLDVR	AAQLLDVR	23.66	2974877	5
101_130_BN006.wiff	Library Peptides		AAQLLDVR	AAQLLDVR	22.93	41157	6
101_130_BN007.wiff	Library Peptides		AAQLLDVR	AAQLLDVR	22.88	78178	7
101_130_BN008.wiff	Library Peptides		AAQLLDVR	AAQLLDVR	22.77	100794	8
101_130_BN009.wiff	Library Peptides		AAQLLDVR	AAQLLDVR	22.76	64562	9
101_130_BN010.wiff	Library Peptides		AAQLLDVR	AAQLLDVR	22.79	130165	10
101_130_BN011.wiff	Library Peptides		AAQLLDVR	AAQLLDVR	22.83	165267	11
101_130_BN012.wiff	Library Peptides		AAQLLDVR	AAQLLDVR	22.81	107082	12
101_130_BN013.wiff	Library Peptides		AAQLLDVR	AAQLLDVR	22.84	137763	13
101_130_BN014.wiff	Library Peptides		AAQLLDVR	AAQLLDVR	22.77	106437	14
101_130_BN015.wiff	Library Peptides		AAQLLDVR	AAQLLDVR	22.87	70187	15
101_130_BN016.wiff	Library Peptides		AAQLLDVR	AAQLLDVR	22.9	90244	16
101_130_BN017.wiff	Library Peptides		AAQLLDVR	AAQLLDVR	23.07	128128	17
101_130_BN018.wiff	Library Peptides		AAQLLDVR	AAQLLDVR	23.05	109310	18
101_130_BN019.wiff	Library Peptides		AAQLLDVR	AAQLLDVR	23.12	69231	19
101_130_BN020.wiff	Library Peptides		AAQLLDVR	AAQLLDVR	23.03	66303	20
101_130_BN021.wiff	Library Peptides		AAQLLDVR	AAQLLDVR	22.95	61093	21
101_130_BN022.wiff	Library Peptides		AAQLLDVR	AAQLLDVR	23.08	38770	22
101_130_BN023.wiff	Library Peptides		AAQLLDVR	AAQLLDVR	22.98	37295	23
101_130_BN024.wiff	Library Peptides		AAQLLDVR	AAQLLDVR	23.08	41495	24
101_130_BN025.wiff	Library Peptides		AAQLLDVR	AAQLLDVR	23.14	48987	25
101_130_BN026.wiff	Library Peptides		AAQLLDVR	AAQLLDVR	23.76	1850832	26
101_130_BN027.wiff	Library Peptides		AAQLLDVR	AAQLLDVR	23.67	1212256	27
101_130_BN028.wiff	Library Peptides		AAQLLDVR	AAQLLDVR	23.15	139987	28
101_130_BN029.wiff	Library Peptides		AAQLLDVR	AAQLLDVR	22.99	58598	29
101_130_BN030.wiff	Library Peptides		AAQLLDVR	AAQLLDVR	22.77	71272	30
101_130_BN001.wiff	Library Peptides		AASAAMYVPAR	AASAAMYVPAR	19.48	2522	1
101_130_BN002.wiff	Library Peptides		AASAAMYVPAR	AASAAMYVPAR	19.65	1784	2
101_130_BN003.wiff	Library Peptides		AASAAMYVPAR	AASAAMYVPAR	19.65	2169	3
101_130_BN004.wiff	Library Peptides		AASAAMYVPAR	AASAAMYVPAR	19.54	3540	4
101_130_BN005.wiff	Library Peptides		AASAAMYVPAR	AASAAMYVPAR	19.65	2538	5
101_130_BN006.wiff	Library Peptides		AASAAMYVPAR	AASAAMYVPAR	19.74	2697	6
101_130_BN007.wiff	Library Peptides		AASAAMYVPAR	AASAAMYVPAR	19.69	8334	7
101_130_BN008.wiff	Library Peptides		AASAAMYVPAR	AASAAMYVPAR	19.67	6307	8
101_130_BN009.wiff	Library Peptides		AASAAMYVPAR	AASAAMYVPAR	19.36	3883	9
101_130_BN010.wiff	Library Peptides		AASAAMYVPAR	AASAAMYVPAR	19.38	3807	10
101_130_BN011.wiff	Library Peptides		AASAAMYVPAR	AASAAMYVPAR	19.37	1540	11
101_130_BN012.wiff	Library Peptides		AASAAMYVPAR	AASAAMYVPAR	19.41	2735	12
101_130_BN013.wiff	Library Peptides		AASAAMYVPAR	AASAAMYVPAR	19.38	1826	13
101_130_BN014.wiff	Library Peptides		AASAAMYVPAR	AASAAMYVPAR	19.38	3295	14
101_130_BN015.wiff	Library Peptides		AASAAMYVPAR	AASAAMYVPAR	19.41	3541	15
101_130_BN016.wiff	Library Peptides		AASAAMYVPAR	AASAAMYVPAR	19.51	3417	16
101_130_BN017.wiff	Library Peptides		AASAAMYVPAR	AASAAMYVPAR	19.71	5320	17
101_130_BN018.wiff	Library Peptides		AASAAMYVPAR	AASAAMYVPAR	19.78	5692	18
101_130_BN019.wiff	Library Peptides		AASAAMYVPAR	AASAAMYVPAR	19.77	309	19
101_130_BN020.wiff	Library Peptides		AASAAMYVPAR	AASAAMYVPAR	19.78	5560	20
101_130_BN021.wiff	Library Peptides		AASAAMYVPAR	AASAAMYVPAR	19.75	12047	21
101_130_BN022.wiff	Library Peptides		AASAAMYVPAR	AASAAMYVPAR	19.77	6335	22
101_130_BN023.wiff	Library Peptides		AASAAMYVPAR	AASAAMYVPAR	19.75	8705	23
101_130_BN024.wiff	Library Peptides		AASAAMYVPAR	AASAAMYVPAR	19.82	7262	24
101_130_BN025.wiff	Library Peptides		AASAAMYVPAR	AASAAMYVPAR	19.9	7452	25
101_130_BN026.wiff	Library Peptides		AASAAMYVPAR	AASAAMYVPAR	19.95	738	26
101_130_BN027.wiff	Library Peptides		AASAAMYVPAR	AASAAMYVPAR	20.17	6330	27
101_130_BN028.wiff	Library Peptides		AASAAMYVPAR	AASAAMYVPAR	19.83	17866	28
101_130_BN029.wiff	Library Peptides		AASAAMYVPAR	AASAAMYVPAR	19.73	6042	29
101_130_BN030.wiff	Library Peptides		AASAAMYVPAR	AASAAMYVPAR	19.45	21272	30
101_130_BN001.wiff	Library Peptides		AASAAMYVPAR	AASAAM[+16]YVPAR	16.21	167	1
101_130_BN002.wiff	Library Peptides		AASAAMYVPAR	AASAAM[+16]YVPAR	16.2	95	2
101_130_BN003.wiff	Library Peptides		AASAAMYVPAR	AASAAM[+16]YVPAR	16.43	68	3
101_130_BN004.wiff	Library Peptides		AASAAMYVPAR	AASAAM[+16]YVPAR	16.32	62	4
101_130_BN005.wiff	Library Peptides		AASAAMYVPAR	AASAAM[+16]YVPAR	16.33	441	5
101_130_BN006.wiff	Library Peptides		AASAAMYVPAR	AASAAM[+16]YVPAR	16.98	139	6
101_130_BN007.wiff	Library Peptides		AASAAMYVPAR	AASAAM[+16]YVPAR	16.3	364	7
101_130_BN008.wiff	Library Peptides		AASAAMYVPAR	AASAAM[+16]YVPAR	15.96	1069	8
101_130_BN009.wiff	Library Peptides		AASAAMYVPAR	AASAAM[+16]YVPAR	16.15	256	9
101_130_BN010.wiff	Library Peptides		AASAAMYVPAR	AASAAM[+16]YVPAR	16.69	1617	10
101_130_BN011.wiff	Library Peptides		AASAAMYVPAR	AASAAM[+16]YVPAR	16.48	592	11
101_130_BN012.wiff	Library Peptides		AASAAMYVPAR	AASAAM[+16]YVPAR	16.47	261	12
101_130_BN013.wiff	Library Peptides		AASAAMYVPAR	AASAAM[+16]YVPAR	16.49	1902	13
101_130_BN014.wiff	Library Peptides		AASAAMYVPAR	AASAAM[+16]YVPAR	16.4	1500	14
101_130_BN015.wiff	Library Peptides		AASAAMYVPAR	AASAAM[+16]YVPAR	16.1	1118	15
101_130_BN016.wiff	Library Peptides		AASAAMYVPAR	AASAAM[+16]YVPAR	16.26	1692	16
101_130_BN017.wiff	Library Peptides		AASAAMYVPAR	AASAAM[+16]YVPAR	16.32	2853	17
101_130_BN018.wiff	Library Peptides		AASAAMYVPAR	AASAAM[+16]YVPAR	16.65	3531	18
101_130_BN019.wiff	Library Peptides		AASAAMYVPAR	AASAAM[+16]YVPAR	16.43	2843	19
101_130_BN020.wiff	Library Peptides		AASAAMYVPAR	AASAAM[+16]YVPAR	16.73	4337	20
101_130_BN021.wiff	Library Peptides		AASAAMYVPAR	AASAAM[+16]YVPAR	16.71	5412	21
101_130_BN022.wiff	Library Peptides		AASAAMYVPAR	AASAAM[+16]YVPAR	16.4	3870	22
101_130_BN023.wiff	Library Peptides		AASAAMYVPAR	AASAAM[+16]YVPAR	16.36	4417	23
101_130_BN024.wiff	Library Peptides		AASAAMYVPAR	AASAAM[+16]YVPAR	16.73	7286	24
101_130_BN025.wiff	Library Peptides		AASAAMYVPAR	AASAAM[+16]YVPAR	16.51	6993	25
101_130_BN026.wiff	Library Peptides		AASAAMYVPAR	AASAAM[+16]YVPAR	17.09	16348	26
101_130_BN027.wiff	Library Peptides		AASAAMYVPAR	AASAAM[+16]YVPAR	16.91	4663	27
101_130_BN028.wiff	Library Peptides		AASAAMYVPAR	AASAAM[+16]YVPAR	16.36	29987	28
101_130_BN029.wiff	Library Peptides		AASAAMYVPAR	AASAAM[+16]YVPAR	16.65	8612	29
101_130_BN030.wiff	Library Peptides		AASAAMYVPAR	AASAAM[+16]YVPAR	16.17	6988	30
101_130_BN001.wiff	Library Peptides		AASAFFTYVSLNQEGK	AASAFFTYVSLNQEGK	34.47	211	1
101_130_BN002.wiff	Library Peptides		AASAFFTYVSLNQEGK	AASAFFTYVSLNQEGK	33.81	17317	2
101_130_BN003.wiff	Library Peptides		AASAFFTYVSLNQEGK	AASAFFTYVSLNQEGK	33.8	16563	3
101_130_BN004.wiff	Library Peptides		AASAFFTYVSLNQEGK	AASAFFTYVSLNQEGK	33.63	50912	4
101_130_BN005.wiff	Library Peptides		AASAFFTYVSLNQEGK	AASAFFTYVSLNQEGK	33.66	41563	5
101_130_BN006.wiff	Library Peptides		AASAFFTYVSLNQEGK	AASAFFTYVSLNQEGK	33.52	22277	6
101_130_BN007.wiff	Library Peptides		AASAFFTYVSLNQEGK	AASAFFTYVSLNQEGK	33.44	30347	7
101_130_BN008.wiff	Library Peptides		AASAFFTYVSLNQEGK	AASAFFTYVSLNQEGK	33.41	36802	8
101_130_BN009.wiff	Library Peptides		AASAFFTYVSLNQEGK	AASAFFTYVSLNQEGK	33.33	34392	9
101_130_BN010.wiff	Library Peptides		AASAFFTYVSLNQEGK	AASAFFTYVSLNQEGK	33.44	47210	10
101_130_BN011.wiff	Library Peptides		AASAFFTYVSLNQEGK	AASAFFTYVSLNQEGK	33.44	24454	11
101_130_BN012.wiff	Library Peptides		AASAFFTYVSLNQEGK	AASAFFTYVSLNQEGK	33.96	14510	12
101_130_BN013.wiff	Library Peptides		AASAFFTYVSLNQEGK	AASAFFTYVSLNQEGK	33.74	13589	13
101_130_BN014.wiff	Library Peptides		AASAFFTYVSLNQEGK	AASAFFTYVSLNQEGK	33.52	10743	14
101_130_BN015.wiff	Library Peptides		AASAFFTYVSLNQEGK	AASAFFTYVSLNQEGK	33.53	6518	15
101_130_BN016.wiff	Library Peptides		AASAFFTYVSLNQEGK	AASAFFTYVSLNQEGK	33.81	11565	16
101_130_BN017.wiff	Library Peptides		AASAFFTYVSLNQEGK	AASAFFTYVSLNQEGK	33.97	36929	17
101_130_BN018.wiff	Library Peptides		AASAFFTYVSLNQEGK	AASAFFTYVSLNQEGK	33.91	18967	18
101_130_BN019.wiff	Library Peptides		AASAFFTYVSLNQEGK	AASAFFTYVSLNQEGK	34.07	157271	19
101_130_BN020.wiff	Library Peptides		AASAFFTYVSLNQEGK	AASAFFTYVSLNQEGK	33.8	121005	20
101_130_BN021.wiff	Library Peptides		AASAFFTYVSLNQEGK	AASAFFTYVSLNQEGK	33.39	6394	21
101_130_BN022.wiff	Library Peptides		AASAFFTYVSLNQEGK	AASAFFTYVSLNQEGK	33.59	2051	22
101_130_BN023.wiff	Library Peptides		AASAFFTYVSLNQEGK	AASAFFTYVSLNQEGK	33.63	2728	23
101_130_BN024.wiff	Library Peptides		AASAFFTYVSLNQEGK	AASAFFTYVSLNQEGK	33.94	7666	24
101_130_BN025.wiff	Library Peptides		AASAFFTYVSLNQEGK	AASAFFTYVSLNQEGK	34.35	2712	25
101_130_BN026.wiff	Library Peptides		AASAFFTYVSLNQEGK	AASAFFTYVSLNQEGK	36.77	34698	26
101_130_BN027.wiff	Library Peptides		AASAFFTYVSLNQEGK	AASAFFTYVSLNQEGK	35.61	4063	27
101_130_BN028.wiff	Library Peptides		AASAFFTYVSLNQEGK	AASAFFTYVSLNQEGK	33.97	3980	28
101_130_BN029.wiff	Library Peptides		AASAFFTYVSLNQEGK	AASAFFTYVSLNQEGK	33.62	11111	29
101_130_BN030.wiff	Library Peptides		AASAFFTYVSLNQEGK	AASAFFTYVSLNQEGK	33.19	13429	30
101_130_BN001.wiff	Library Peptides		AASAFFTYVSLNQEGKPMPVPQLVPETEDEK	AASAFFTYVSLNQEGKPMPVPQLVPETEDEK	38.47	1646	1
101_130_BN002.wiff	Library Peptides		AASAFFTYVSLNQEGKPMPVPQLVPETEDEK	AASAFFTYVSLNQEGKPMPVPQLVPETEDEK	38.07	2346	2
101_130_BN003.wiff	Library Peptides		AASAFFTYVSLNQEGKPMPVPQLVPETEDEK	AASAFFTYVSLNQEGKPMPVPQLVPETEDEK	37.18	48727	3
101_130_BN004.wiff	Library Peptides		AASAFFTYVSLNQEGKPMPVPQLVPETEDEK	AASAFFTYVSLNQEGKPMPVPQLVPETEDEK	37.06	78246	4
101_130_BN005.wiff	Library Peptides		AASAFFTYVSLNQEGKPMPVPQLVPETEDEK	AASAFFTYVSLNQEGKPMPVPQLVPETEDEK	37.43	77060	5
101_130_BN006.wiff	Library Peptides		AASAFFTYVSLNQEGKPMPVPQLVPETEDEK	AASAFFTYVSLNQEGKPMPVPQLVPETEDEK	36.82	58048	6
101_130_BN007.wiff	Library Peptides		AASAFFTYVSLNQEGKPMPVPQLVPETEDEK	AASAFFTYVSLNQEGKPMPVPQLVPETEDEK	36.75	53944	7
101_130_BN008.wiff	Library Peptides		AASAFFTYVSLNQEGKPMPVPQLVPETEDEK	AASAFFTYVSLNQEGKPMPVPQLVPETEDEK	36.72	57944	8
101_130_BN009.wiff	Library Peptides		AASAFFTYVSLNQEGKPMPVPQLVPETEDEK	AASAFFTYVSLNQEGKPMPVPQLVPETEDEK	36.6	23969	9
101_130_BN010.wiff	Library Peptides		AASAFFTYVSLNQEGKPMPVPQLVPETEDEK	AASAFFTYVSLNQEGKPMPVPQLVPETEDEK	36.72	60768	10
101_130_BN011.wiff	Library Peptides		AASAFFTYVSLNQEGKPMPVPQLVPETEDEK	AASAFFTYVSLNQEGKPMPVPQLVPETEDEK	36.62	15616	11
101_130_BN012.wiff	Library Peptides		AASAFFTYVSLNQEGKPMPVPQLVPETEDEK	AASAFFTYVSLNQEGKPMPVPQLVPETEDEK	37.31	9905	12
101_130_BN013.wiff	Library Peptides		AASAFFTYVSLNQEGKPMPVPQLVPETEDEK	AASAFFTYVSLNQEGKPMPVPQLVPETEDEK	36.76	6629	13
101_130_BN014.wiff	Library Peptides		AASAFFTYVSLNQEGKPMPVPQLVPETEDEK	AASAFFTYVSLNQEGKPMPVPQLVPETEDEK	37.27	8577	14
101_130_BN015.wiff	Library Peptides		AASAFFTYVSLNQEGKPMPVPQLVPETEDEK	AASAFFTYVSLNQEGKPMPVPQLVPETEDEK	36.32	16685	15
101_130_BN016.wiff	Library Peptides		AASAFFTYVSLNQEGKPMPVPQLVPETEDEK	AASAFFTYVSLNQEGKPMPVPQLVPETEDEK	36.9	10811	16
101_130_BN017.wiff	Library Peptides		AASAFFTYVSLNQEGKPMPVPQLVPETEDEK	AASAFFTYVSLNQEGKPMPVPQLVPETEDEK	36.45	14423	17
101_130_BN018.wiff	Library Peptides		AASAFFTYVSLNQEGKPMPVPQLVPETEDEK	AASAFFTYVSLNQEGKPMPVPQLVPETEDEK	36.51	19113	18
101_130_BN019.wiff	Library Peptides		AASAFFTYVSLNQEGKPMPVPQLVPETEDEK	AASAFFTYVSLNQEGKPMPVPQLVPETEDEK	37.57	24746	19
[truncated: 54,251 more rows]

## Sheet: Peak picked
File Name	Protein Description	Peptide Sequence	Peptide Modified Sequence	Best Retention Time	Total Area	Replicate		Sum	Percentage of total
101_130_BN001.wiff	Cacna1g	KDALSLSGLSSDPTDLDP	KDALSLSGLSSDPTDLDP	31.97	1854	1		1179338	0.00157207
101_130_BN002.wiff	Cacna1g	KDALSLSGLSSDPTDLDP	KDALSLSGLSSDPTDLDP	31.41	561	2			0.000475691
101_130_BN003.wiff	Cacna1g	KDALSLSGLSSDPTDLDP	KDALSLSGLSSDPTDLDP	31.38	1376	3			0.00116676
101_130_BN004.wiff	Cacna1g	KDALSLSGLSSDPTDLDP	KDALSLSGLSSDPTDLDP	31.34	1799	4			0.00152543
101_130_BN005.wiff	Cacna1g	KDALSLSGLSSDPTDLDP	KDALSLSGLSSDPTDLDP	31.38	1018	5			0.000863196
101_130_BN006.wiff	Cacna1g	KDALSLSGLSSDPTDLDP	KDALSLSGLSSDPTDLDP	31.51	6015	6			0.00510032
101_130_BN007.wiff	Cacna1g	KDALSLSGLSSDPTDLDP	KDALSLSGLSSDPTDLDP	31.42	4874	7			0.00413283
101_130_BN008.wiff	Cacna1g	KDALSLSGLSSDPTDLDP	KDALSLSGLSSDPTDLDP	31.4	4696	8			0.00398189
101_130_BN009.wiff	Cacna1g	KDALSLSGLSSDPTDLDP	KDALSLSGLSSDPTDLDP	31.33	4058	9			0.00344091
101_130_BN010.wiff	Cacna1g	KDALSLSGLSSDPTDLDP	KDALSLSGLSSDPTDLDP	31.43	4249	10			0.00360287
101_130_BN011.wiff	Cacna1g	KDALSLSGLSSDPTDLDP	KDALSLSGLSSDPTDLDP	31.41	5779	11			0.00490021
101_130_BN012.wiff	Cacna1g	KDALSLSGLSSDPTDLDP	KDALSLSGLSSDPTDLDP	31.4	4481	12			0.00379959
101_130_BN013.wiff	Cacna1g	KDALSLSGLSSDPTDLDP	KDALSLSGLSSDPTDLDP	31.35	3507	13			0.0029737
101_130_BN014.wiff	Cacna1g	KDALSLSGLSSDPTDLDP	KDALSLSGLSSDPTDLDP	31.29	4374	14			0.00370886
101_130_BN015.wiff	Cacna1g	KDALSLSGLSSDPTDLDP	KDALSLSGLSSDPTDLDP	31.46	6509	15			0.0055192
101_130_BN016.wiff	Cacna1g	KDALSLSGLSSDPTDLDP	KDALSLSGLSSDPTDLDP	31.46	7356	16			0.0062374
101_130_BN017.wiff	Cacna1g	KDALSLSGLSSDPTDLDP	KDALSLSGLSSDPTDLDP	31.61	6497	17			0.00550902
101_130_BN018.wiff	Cacna1g	KDALSLSGLSSDPTDLDP	KDALSLSGLSSDPTDLDP	31.63	6891	18			0.00584311
101_130_BN019.wiff	Cacna1g	KDALSLSGLSSDPTDLDP	KDALSLSGLSSDPTDLDP	31.71	6853	19			0.00581089
101_130_BN020.wiff	Cacna1g	KDALSLSGLSSDPTDLDP	KDALSLSGLSSDPTDLDP	31.54	6186	20			0.00524532
101_130_BN021.wiff	Cacna1g	KDALSLSGLSSDPTDLDP	KDALSLSGLSSDPTDLDP	31.8	15307	21			0.0129793
101_130_BN022.wiff	Cacna1g	KDALSLSGLSSDPTDLDP	KDALSLSGLSSDPTDLDP	31.81	47553	22			0.0403218
101_130_BN023.wiff	Cacna1g	KDALSLSGLSSDPTDLDP	KDALSLSGLSSDPTDLDP	31.82	68730	23			0.0582785
101_130_BN024.wiff	Cacna1g	KDALSLSGLSSDPTDLDP	KDALSLSGLSSDPTDLDP	31.94	128270	24			0.108764
101_130_BN025.wiff	Cacna1g	KDALSLSGLSSDPTDLDP	KDALSLSGLSSDPTDLDP	31.99	171692	25			0.145583
101_130_BN026.wiff	Cacna1g	KDALSLSGLSSDPTDLDP	KDALSLSGLSSDPTDLDP	33.94	199125	26			0.168845
101_130_BN027.wiff	Cacna1g	KDALSLSGLSSDPTDLDP	KDALSLSGLSSDPTDLDP	33.27	195941	27			0.166145
101_130_BN028.wiff	Cacna1g	KDALSLSGLSSDPTDLDP	KDALSLSGLSSDPTDLDP	31.91	170852	28			0.144871
101_130_BN029.wiff	Cacna1g	KDALSLSGLSSDPTDLDP	KDALSLSGLSSDPTDLDP	31.78	50399	29			0.042735
101_130_BN030.wiff	Cacna1g	KDALSLSGLSSDPTDLDP	KDALSLSGLSSDPTDLDP	31.46	42536	30			0.0360677
101_130_BN001.wiff	Cacna1g	SSFDLPDTLQVPGLHR	SSFDLPDTLQVPGLHR	34.47	53	1		1066855	4.96787e-05
101_130_BN002.wiff	Cacna1g	SSFDLPDTLQVPGLHR	SSFDLPDTLQVPGLHR	34.43	1520	2			0.00142475
101_130_BN003.wiff	Cacna1g	SSFDLPDTLQVPGLHR	SSFDLPDTLQVPGLHR	32.81	887	3			0.000831416
101_130_BN004.wiff	Cacna1g	SSFDLPDTLQVPGLHR	SSFDLPDTLQVPGLHR	33.74	830	4			0.000777988
101_130_BN005.wiff	Cacna1g	SSFDLPDTLQVPGLHR	SSFDLPDTLQVPGLHR	33.57	934	5			0.00087547
101_130_BN006.wiff	Cacna1g	SSFDLPDTLQVPGLHR	SSFDLPDTLQVPGLHR	33.8	1016	6			0.000952332
101_130_BN007.wiff	Cacna1g	SSFDLPDTLQVPGLHR	SSFDLPDTLQVPGLHR	34.29	2437	7			0.00228428
101_130_BN008.wiff	Cacna1g	SSFDLPDTLQVPGLHR	SSFDLPDTLQVPGLHR	33.64	4936	8			0.00462668
101_130_BN009.wiff	Cacna1g	SSFDLPDTLQVPGLHR	SSFDLPDTLQVPGLHR	33.31	2615	9			0.00245113
101_130_BN010.wiff	Cacna1g	SSFDLPDTLQVPGLHR	SSFDLPDTLQVPGLHR	33.51	4437	10			0.00415895
101_130_BN011.wiff	Cacna1g	SSFDLPDTLQVPGLHR	SSFDLPDTLQVPGLHR	33.77	1293	11			0.00121197
101_130_BN012.wiff	Cacna1g	SSFDLPDTLQVPGLHR	SSFDLPDTLQVPGLHR	33.54	1427	12			0.00133758
101_130_BN013.wiff	Cacna1g	SSFDLPDTLQVPGLHR	SSFDLPDTLQVPGLHR	33.61	1524	13			0.0014285
101_130_BN014.wiff	Cacna1g	SSFDLPDTLQVPGLHR	SSFDLPDTLQVPGLHR	33.46	880	14			0.000824854
101_130_BN015.wiff	Cacna1g	SSFDLPDTLQVPGLHR	SSFDLPDTLQVPGLHR	34.05	687	15			0.000643949
101_130_BN016.wiff	Cacna1g	SSFDLPDTLQVPGLHR	SSFDLPDTLQVPGLHR	33.98	943	16			0.000883906
101_130_BN017.wiff	Cacna1g	SSFDLPDTLQVPGLHR	SSFDLPDTLQVPGLHR	33.9	4112	17			0.00385432
101_130_BN018.wiff	Cacna1g	SSFDLPDTLQVPGLHR	SSFDLPDTLQVPGLHR	33.68	1365	18			0.00127946
101_130_BN019.wiff	Cacna1g	SSFDLPDTLQVPGLHR	SSFDLPDTLQVPGLHR	33.67	1827	19			0.00171251
101_130_BN020.wiff	Cacna1g	SSFDLPDTLQVPGLHR	SSFDLPDTLQVPGLHR	33.5	5710	20			0.00535218
101_130_BN021.wiff	Cacna1g	SSFDLPDTLQVPGLHR	SSFDLPDTLQVPGLHR	33.52	21465	21			0.0201199
101_130_BN022.wiff	Cacna1g	SSFDLPDTLQVPGLHR	SSFDLPDTLQVPGLHR	33.53	38058	22			0.0356731
101_130_BN023.wiff	Cacna1g	SSFDLPDTLQVPGLHR	SSFDLPDTLQVPGLHR	33.6	62174	23			0.0582778
101_130_BN024.wiff	Cacna1g	SSFDLPDTLQVPGLHR	SSFDLPDTLQVPGLHR	34.08	109950	24			0.10306
101_130_BN025.wiff	Cacna1g	SSFDLPDTLQVPGLHR	SSFDLPDTLQVPGLHR	34.57	137788	25			0.129153
101_130_BN026.wiff	Cacna1g	SSFDLPDTLQVPGLHR	SSFDLPDTLQVPGLHR	40.03	188878	26			0.177042
101_130_BN027.wiff	Cacna1g	SSFDLPDTLQVPGLHR	SSFDLPDTLQVPGLHR	38.84	216742	27			0.20316
101_130_BN028.wiff	Cacna1g	SSFDLPDTLQVPGLHR	SSFDLPDTLQVPGLHR	33.73	172586	28			0.161771
101_130_BN029.wiff	Cacna1g	SSFDLPDTLQVPGLHR	SSFDLPDTLQVPGLHR	33.52	41223	29			0.0386397
101_130_BN030.wiff	Cacna1g	SSFDLPDTLQVPGLHR	SSFDLPDTLQVPGLHR	33.18	38558	30			0.0361417
101_130_BN001.wiff	Cacna1g	TDSLDVQGLGSR	TDSLDVQGLGSR	22.71	15427	1		39769955	0.000387906
101_130_BN002.wiff	Cacna1g	TDSLDVQGLGSR	TDSLDVQGLGSR	22.93	19993	2			0.000502716
101_130_BN003.wiff	Cacna1g	TDSLDVQGLGSR	TDSLDVQGLGSR	22.99	50113	3			0.00126007
101_130_BN004.wiff	Cacna1g	TDSLDVQGLGSR	TDSLDVQGLGSR	22.82	82704	4			0.00207956
101_130_BN005.wiff	Cacna1g	TDSLDVQGLGSR	TDSLDVQGLGSR	22.81	163531	5			0.00411192
101_130_BN006.wiff	Cacna1g	TDSLDVQGLGSR	TDSLDVQGLGSR	22.75	293341	6			0.00737594
101_130_BN007.wiff	Cacna1g	TDSLDVQGLGSR	TDSLDVQGLGSR	22.67	1094795	7			0.0275282
101_130_BN008.wiff	Cacna1g	TDSLDVQGLGSR	TDSLDVQGLGSR	22.54	7297164	8			0.183484
101_130_BN009.wiff	Cacna1g	TDSLDVQGLGSR	TDSLDVQGLGSR	22.48	7740948	9			0.194643
101_130_BN010.wiff	Cacna1g	TDSLDVQGLGSR	TDSLDVQGLGSR	22.57	5015367	10			0.126109
101_130_BN011.wiff	Cacna1g	TDSLDVQGLGSR	TDSLDVQGLGSR	22.64	1693077	11			0.0425718
101_130_BN012.wiff	Cacna1g	TDSLDVQGLGSR	TDSLDVQGLGSR	22.63	714816	12			0.0179738
101_130_BN013.wiff	Cacna1g	TDSLDVQGLGSR	TDSLDVQGLGSR	22.66	756421	13			0.0190199
101_130_BN014.wiff	Cacna1g	TDSLDVQGLGSR	TDSLDVQGLGSR	22.59	655215	14			0.0164751
101_130_BN015.wiff	Cacna1g	TDSLDVQGLGSR	TDSLDVQGLGSR	22.68	523009	15			0.0131509
101_130_BN016.wiff	Cacna1g	TDSLDVQGLGSR	TDSLDVQGLGSR	22.7	594638	16			0.0149519
101_130_BN017.wiff	Cacna1g	TDSLDVQGLGSR	TDSLDVQGLGSR	22.88	669653	17			0.0168382
101_130_BN018.wiff	Cacna1g	TDSLDVQGLGSR	TDSLDVQGLGSR	22.88	654554	18			0.0164585
101_130_BN019.wiff	Cacna1g	TDSLDVQGLGSR	TDSLDVQGLGSR	22.96	418364	19			0.0105196
101_130_BN020.wiff	Cacna1g	TDSLDVQGLGSR	TDSLDVQGLGSR	22.86	1124971	20			0.028287
101_130_BN021.wiff	Cacna1g	TDSLDVQGLGSR	TDSLDVQGLGSR	22.77	2392536	21			0.0601594
101_130_BN022.wiff	Cacna1g	TDSLDVQGLGSR	TDSLDVQGLGSR	22.87	2008723	22			0.0505086
101_130_BN023.wiff	Cacna1g	TDSLDVQGLGSR	TDSLDVQGLGSR	22.81	1355648	23			0.0340872
101_130_BN024.wiff	Cacna1g	TDSLDVQGLGSR	TDSLDVQGLGSR	22.9	1382182	24			0.0347544
101_130_BN025.wiff	Cacna1g	TDSLDVQGLGSR	TDSLDVQGLGSR	22.9	990267	25			0.0248999
101_130_BN026.wiff	Cacna1g	TDSLDVQGLGSR	TDSLDVQGLGSR	23.03	887691	26			0.0223206
101_130_BN027.wiff	Cacna1g	TDSLDVQGLGSR	TDSLDVQGLGSR	23.08	530304	27			0.0133343
101_130_BN028.wiff	Cacna1g	TDSLDVQGLGSR	TDSLDVQGLGSR	22.97	385413	28			0.00969106
101_130_BN029.wiff	Cacna1g	TDSLDVQGLGSR	TDSLDVQGLGSR	22.84	112480	29			0.00282827
101_130_BN030.wiff	Cacna1g	TDSLDVQGLGSR	TDSLDVQGLGSR	22.61	146610	30			0.00368645
101_130_BN001.wiff	Calmodulin	ADQLTEEQIAEFK	A[+42]DQLTEEQIAEFK	32.07	140439	1		21640531	0.00648963
101_130_BN002.wiff	Calmodulin	ADQLTEEQIAEFK	A[+42]DQLTEEQIAEFK	32.12	159667	2			0.00737815
101_130_BN003.wiff	Calmodulin	ADQLTEEQIAEFK	A[+42]DQLTEEQIAEFK	32.12	140274	3			0.006482
101_130_BN004.wiff	Calmodulin	ADQLTEEQIAEFK	A[+42]DQLTEEQIAEFK	32.02	185478	4			0.00857086
101_130_BN005.wiff	Calmodulin	ADQLTEEQIAEFK	A[+42]DQLTEEQIAEFK	32.06	154572	5			0.00714271
101_130_BN006.wiff	Calmodulin	ADQLTEEQIAEFK	A[+42]DQLTEEQIAEFK	32.04	188500	6			0.00871051
101_130_BN007.wiff	Calmodulin	ADQLTEEQIAEFK	A[+42]DQLTEEQIAEFK	31.92	704369	7			0.0325486
101_130_BN008.wiff	Calmodulin	ADQLTEEQIAEFK	A[+42]DQLTEEQIAEFK	31.95	2818760	8			0.130254
101_130_BN009.wiff	Calmodulin	ADQLTEEQIAEFK	A[+42]DQLTEEQIAEFK	31.86	5230003	9			0.241676
101_130_BN010.wiff	Calmodulin	ADQLTEEQIAEFK	A[+42]DQLTEEQIAEFK	31.96	3469428	10			0.160321
101_130_BN011.wiff	Calmodulin	ADQLTEEQIAEFK	A[+42]DQLTEEQIAEFK	31.98	962134	11			0.0444598
101_130_BN012.wiff	Calmodulin	ADQLTEEQIAEFK	A[+42]DQLTEEQIAEFK	31.9	371070	12			0.017147
101_130_BN013.wiff	Calmodulin	ADQLTEEQIAEFK	A[+42]DQLTEEQIAEFK	31.91	342842	13			0.0158426
101_130_BN014.wiff	Calmodulin	ADQLTEEQIAEFK	A[+42]DQLTEEQIAEFK	31.84	408152	14			0.0188605
101_130_BN015.wiff	Calmodulin	ADQLTEEQIAEFK	A[+42]DQLTEEQIAEFK	31.97	339480	15			0.0156872
101_130_BN016.wiff	Calmodulin	ADQLTEEQIAEFK	A[+42]DQLTEEQIAEFK	31.97	325743	16			0.0150524
101_130_BN017.wiff	Calmodulin	ADQLTEEQIAEFK	A[+42]DQLTEEQIAEFK	32.1	371130	17			0.0171498
101_130_BN018.wiff	Calmodulin	ADQLTEEQIAEFK	A[+42]DQLTEEQIAEFK	32.17	370895	18			0.0171389
101_130_BN019.wiff	Calmodulin	ADQLTEEQIAEFK	A[+42]DQLTEEQIAEFK	32.21	214018	19			0.00988968
101_130_BN020.wiff	Calmodulin	ADQLTEEQIAEFK	A[+42]DQLTEEQIAEFK	32.08	500774	20			0.0231406
101_130_BN021.wiff	Calmodulin	ADQLTEEQIAEFK	A[+42]DQLTEEQIAEFK	32.07	1067657	21			0.049336
101_130_BN022.wiff	Calmodulin	ADQLTEEQIAEFK	A[+42]DQLTEEQIAEFK	32.05	637731	22			0.0294693
101_130_BN023.wiff	Calmodulin	ADQLTEEQIAEFK	A[+42]DQLTEEQIAEFK	32.08	604756	23			0.0279455
101_130_BN024.wiff	Calmodulin	ADQLTEEQIAEFK	A[+42]DQLTEEQIAEFK	32.17	574682	24			0.0265558
101_130_BN025.wiff	Calmodulin	ADQLTEEQIAEFK	A[+42]DQLTEEQIAEFK	32.12	404356	25			0.0186851
101_130_BN026.wiff	Calmodulin	ADQLTEEQIAEFK	A[+42]DQLTEEQIAEFK	32.42	500403	26			0.0231234
101_130_BN027.wiff	Calmodulin	ADQLTEEQIAEFK	A[+42]DQLTEEQIAEFK	32.3	222564	27			0.0102846
101_130_BN028.wiff	Calmodulin	ADQLTEEQIAEFK	A[+42]DQLTEEQIAEFK	32.14	160008	28			0.0073939
101_130_BN029.wiff	Calmodulin	ADQLTEEQIAEFK	A[+42]DQLTEEQIAEFK	32.06	55887	29			0.00258252
101_130_BN030.wiff	Calmodulin	ADQLTEEQIAEFK	A[+42]DQLTEEQIAEFK	31.76	14759	30			0.000682007
101_130_BN001.wiff	Calmodulin	VFDKDGNGYISAAELR	VFDKDGNGYISAAELR	25.42	5196	1		4546026	0.00114298
101_130_BN002.wiff	Calmodulin	VFDKDGNGYISAAELR	VFDKDGNGYISAAELR	25.84	18904	2			0.00415836
101_130_BN003.wiff	Calmodulin	VFDKDGNGYISAAELR	VFDKDGNGYISAAELR	25.5	47226	3			0.0103884
101_130_BN004.wiff	Calmodulin	VFDKDGNGYISAAELR	VFDKDGNGYISAAELR	25.32	51574	4			0.0113449
101_130_BN005.wiff	Calmodulin	VFDKDGNGYISAAELR	VFDKDGNGYISAAELR	25.37	63923	5			0.0140613
101_130_BN006.wiff	Calmodulin	VFDKDGNGYISAAELR	VFDKDGNGYISAAELR	25.26	64228	6			0.0141284
101_130_BN007.wiff	Calmodulin	VFDKDGNGYISAAELR	VFDKDGNGYISAAELR	25.22	206377	7			0.0453972
101_130_BN008.wiff	Calmodulin	VFDKDGNGYISAAELR	VFDKDGNGYISAAELR	25.14	814179	8			0.179097
101_130_BN009.wiff	Calmodulin	VFDKDGNGYISAAELR	VFDKDGNGYISAAELR	25.08	1004323	9			0.220923
101_130_BN010.wiff	Calmodulin	VFDKDGNGYISAAELR	VFDKDGNGYISAAELR	25.14	660659	10			0.145327
101_130_BN011.wiff	Calmodulin	VFDKDGNGYISAAELR	VFDKDGNGYISAAELR	25.11	258677	11			0.0569018
101_130_BN012.wiff	Calmodulin	VFDKDGNGYISAAELR	VFDKDGNGYISAAELR	25.13	90802	12			0.0199739
101_130_BN013.wiff	Calmodulin	VFDKDGNGYISAAELR	VFDKDGNGYISAAELR	25.17	89448	13			0.0196761
101_130_BN014.wiff	Calmodulin	VFDKDGNGYISAAELR	VFDKDGNGYISAAELR	25.07	79400	14			0.0174658
101_130_BN015.wiff	Calmodulin	VFDKDGNGYISAAELR	VFDKDGNGYISAAELR	25.18	58539	15			0.012877
101_130_BN016.wiff	Calmodulin	VFDKDGNGYISAAELR	VFDKDGNGYISAAELR	25.17	70822	16			0.0155789
101_130_BN017.wiff	Calmodulin	VFDKDGNGYISAAELR	VFDKDGNGYISAAELR	25.41	93875	17			0.0206499
101_130_BN018.wiff	Calmodulin	VFDKDGNGYISAAELR	VFDKDGNGYISAAELR	25.36	64278	18			0.0141394
101_130_BN019.wiff	Calmodulin	VFDKDGNGYISAAELR	VFDKDGNGYISAAELR	25.47	40132	19			0.00882793
101_130_BN020.wiff	Calmodulin	VFDKDGNGYISAAELR	VFDKDGNGYISAAELR	25.35	102824	20			0.0226184
101_130_BN021.wiff	Calmodulin	VFDKDGNGYISAAELR	VFDKDGNGYISAAELR	25.27	181143	21			0.0398465
101_130_BN022.wiff	Calmodulin	VFDKDGNGYISAAELR	VFDKDGNGYISAAELR	25.36	123744	22			0.0272203
101_130_BN023.wiff	Calmodulin	VFDKDGNGYISAAELR	VFDKDGNGYISAAELR	25.36	100352	23			0.0220747
101_130_BN024.wiff	Calmodulin	VFDKDGNGYISAAELR	VFDKDGNGYISAAELR	25.44	74779	24			0.0164493
101_130_BN025.wiff	Calmodulin	VFDKDGNGYISAAELR	VFDKDGNGYISAAELR	26.23	127186	25			0.0279774
101_130_BN026.wiff	Calmodulin	VFDKDGNGYISAAELR	VFDKDGNGYISAAELR	25.23	3622	26			0.00079674
101_130_BN027.wiff	Calmodulin	VFDKDGNGYISAAELR	VFDKDGNGYISAAELR	25.27	1651	27			0.000363174
101_130_BN028.wiff	Calmodulin	VFDKDGNGYISAAELR	VFDKDGNGYISAAELR	25.46	32155	28			0.00707321
101_130_BN029.wiff	Calmodulin	VFDKDGNGYISAAELR	VFDKDGNGYISAAELR	25.32	7960	29			0.00175098
101_130_BN030.wiff	Calmodulin	VFDKDGNGYISAAELR	VFDKDGNGYISAAELR	25.08	8048	30			0.00177034
101_130_BN001.wiff	Camk2a	FTEEYQLFEELGK	FTEEYQLFEELGK	36.68	29237	1		945283	0.0309294
101_130_BN002.wiff	Camk2a	FTEEYQLFEELGK	FTEEYQLFEELGK	36.33	25941	2			0.0274426
101_130_BN003.wiff	Camk2a	FTEEYQLFEELGK	FTEEYQLFEELGK	35.48	16159	3			0.0170944
101_130_BN004.wiff	Camk2a	FTEEYQLFEELGK	FTEEYQLFEELGK	35.35	92672	4			0.0980362
101_130_BN005.wiff	Camk2a	FTEEYQLFEELGK	FTEEYQLFEELGK	35.47	68100	5			0.0720419
101_130_BN006.wiff	Camk2a	FTEEYQLFEELGK	FTEEYQLFEELGK	35.26	35776	6			0.0378469
101_130_BN007.wiff	Camk2a	FTEEYQLFEELGK	FTEEYQLFEELGK	35.18	3773	7			0.0039914
101_130_BN008.wiff	Camk2a	FTEEYQLFEELGK	FTEEYQLFEELGK	35.19	13530	8			0.0143132
101_130_BN009.wiff	Camk2a	FTEEYQLFEELGK	FTEEYQLFEELGK	35.11	50914	9			0.0538611
101_130_BN010.wiff	Camk2a	FTEEYQLFEELGK	FTEEYQLFEELGK	35.21	37159	10			0.0393099
101_130_BN011.wiff	Camk2a	FTEEYQLFEELGK	FTEEYQLFEELGK	34.47	6672	11			0.0070582
101_130_BN012.wiff	Camk2a	FTEEYQLFEELGK	FTEEYQLFEELGK	35.2	22094	12			0.0233729
101_130_BN013.wiff	Camk2a	FTEEYQLFEELGK	FTEEYQLFEELGK	35.79	2364	13			0.00250084
101_130_BN014.wiff	Camk2a	FTEEYQLFEELGK	FTEEYQLFEELGK	35.03	35975	14			0.0380574
101_130_BN015.wiff	Camk2a	FTEEYQLFEELGK	FTEEYQLFEELGK	35.21	15587	15			0.0164892
101_130_BN016.wiff	Camk2a	FTEEYQLFEELGK	FTEEYQLFEELGK	35.27	43580	16			0.0461026
101_130_BN017.wiff	Camk2a	FTEEYQLFEELGK	FTEEYQLFEELGK	35.73	9377	17			0.00991978
101_130_BN018.wiff	Camk2a	FTEEYQLFEELGK	FTEEYQLFEELGK	35.44	19119	18			0.0202257
101_130_BN019.wiff	Camk2a	FTEEYQLFEELGK	FTEEYQLFEELGK	35.52	65374	19			0.0691581
101_130_BN020.wiff	Camk2a	FTEEYQLFEELGK	FTEEYQLFEELGK	35.3	18177	20			0.0192292
101_130_BN021.wiff	Camk2a	FTEEYQLFEELGK	FTEEYQLFEELGK	35.89	2838	21			0.00300228
101_130_BN022.wiff	Camk2a	FTEEYQLFEELGK	FTEEYQLFEELGK	36.01	3190	22			0.00337465
101_130_BN023.wiff	Camk2a	FTEEYQLFEELGK	FTEEYQLFEELGK	35.43	22637	23			0.0239473
101_130_BN024.wiff	Camk2a	FTEEYQLFEELGK	FTEEYQLFEELGK	35.92	77147	24			0.0816126
101_130_BN025.wiff	Camk2a	FTEEYQLFEELGK	FTEEYQLFEELGK	36.21	76933	25			0.0813862
101_130_BN026.wiff	Camk2a	FTEEYQLFEELGK	FTEEYQLFEELGK	38.84	3483	26			0.00368461
101_130_BN027.wiff	Camk2a	FTEEYQLFEELGK	FTEEYQLFEELGK	38.81	15059	27			0.0159307
101_130_BN028.wiff	Camk2a	FTEEYQLFEELGK	FTEEYQLFEELGK	36.25	31408	28			0.033226
101_130_BN029.wiff	Camk2a	FTEEYQLFEELGK	FTEEYQLFEELGK	35.98	38454	29			0.0406799
101_130_BN030.wiff	Camk2a	FTEEYQLFEELGK	FTEEYQLFEELGK	35.59	62554	30			0.0661749
101_130_BN001.wiff	Camk2a	ITQYLDAGGIPR	ITQYLDAGGIPR	25.96	4381	1		234193	0.0187068
101_130_BN002.wiff	Camk2a	ITQYLDAGGIPR	ITQYLDAGGIPR	26.33	1408	2			0.00601214
101_130_BN003.wiff	Camk2a	ITQYLDAGGIPR	ITQYLDAGGIPR	26.06	3424	3			0.0146204
101_130_BN004.wiff	Camk2a	ITQYLDAGGIPR	ITQYLDAGGIPR	25.86	6254	4			0.0267045
101_130_BN005.wiff	Camk2a	ITQYLDAGGIPR	ITQYLDAGGIPR	25.99	8128	5			0.0347064
101_130_BN006.wiff	Camk2a	ITQYLDAGGIPR	ITQYLDAGGIPR	25.83	1978	6			0.00844603
101_130_BN007.wiff	Camk2a	ITQYLDAGGIPR	ITQYLDAGGIPR	25.8	3663	7			0.0156409
101_130_BN008.wiff	Camk2a	ITQYLDAGGIPR	ITQYLDAGGIPR	25.54	1533	8			0.00654588
101_130_BN009.wiff	Camk2a	ITQYLDAGGIPR	ITQYLDAGGIPR	25.3	2450	9			0.0104615
101_130_BN010.wiff	Camk2a	ITQYLDAGGIPR	ITQYLDAGGIPR	25.46	2874	10			0.0122719
101_130_BN011.wiff	Camk2a	ITQYLDAGGIPR	ITQYLDAGGIPR	25.77	2900	11			0.0123829
101_130_BN012.wiff	Camk2a	ITQYLDAGGIPR	ITQYLDAGGIPR	25.62	1016	12			0.0043383
101_130_BN013.wiff	Camk2a	ITQYLDAGGIPR	ITQYLDAGGIPR	25.33	1765	13			0.00753652
101_130_BN014.wiff	Camk2a	ITQYLDAGGIPR	ITQYLDAGGIPR	25.78	1132	14			0.00483362
101_130_BN015.wiff	Camk2a	ITQYLDAGGIPR	ITQYLDAGGIPR	26.1	919	15			0.00392411
101_130_BN016.wiff	Camk2a	ITQYLDAGGIPR	ITQYLDAGGIPR	25.81	1865	16			0.00796352
101_130_BN017.wiff	Camk2a	ITQYLDAGGIPR	ITQYLDAGGIPR	25.94	2428	17			0.0103675
101_130_BN018.wiff	Camk2a	ITQYLDAGGIPR	ITQYLDAGGIPR	26.01	4158	18			0.0177546
101_130_BN019.wiff	Camk2a	ITQYLDAGGIPR	ITQYLDAGGIPR	25.46	2275	19			0.00971421
101_130_BN020.wiff	Camk2a	ITQYLDAGGIPR	ITQYLDAGGIPR	26	2274	20			0.00970994
101_130_BN021.wiff	Camk2a	ITQYLDAGGIPR	ITQYLDAGGIPR	25.56	2052	21			0.008762
101_130_BN022.wiff	Camk2a	ITQYLDAGGIPR	ITQYLDAGGIPR	25.76	3407	22			0.0145478
101_130_BN023.wiff	Camk2a	ITQYLDAGGIPR	ITQYLDAGGIPR	25.68	3451	23			0.0147357
101_130_BN024.wiff	Camk2a	ITQYLDAGGIPR	ITQYLDAGGIPR	25.42	3511	24			0.0149919
101_130_BN025.wiff	Camk2a	ITQYLDAGGIPR	ITQYLDAGGIPR	25.51	5544	25			0.0236728
101_130_BN026.wiff	Camk2a	ITQYLDAGGIPR	ITQYLDAGGIPR	26.93	5664	26			0.0241852
101_130_BN027.wiff	Camk2a	ITQYLDAGGIPR	ITQYLDAGGIPR	26.86	20464	27			0.0873809
101_130_BN028.wiff	Camk2a	ITQYLDAGGIPR	ITQYLDAGGIPR	25.81	40844	28			0.174403
101_130_BN029.wiff	Camk2a	ITQYLDAGGIPR	ITQYLDAGGIPR	25.66	36273	29			0.154885
101_130_BN030.wiff	Camk2a	ITQYLDAGGIPR	ITQYLDAGGIPR	25.46	56158	30			0.239794
101_130_BN001.wiff	Camk2b	FTDEYQLYEDIGK	FTDEYQLYEDIGK	31.41	1346	1		313202	0.00429755
101_130_BN002.wiff	Camk2b	FTDEYQLYEDIGK	FTDEYQLYEDIGK	31.68	1037	2			0.00331096
101_130_BN003.wiff	Camk2b	FTDEYQLYEDIGK	FTDEYQLYEDIGK	30.64	3552	3			0.0113409
101_130_BN004.wiff	Camk2b	FTDEYQLYEDIGK	FTDEYQLYEDIGK	30.4	6390	4			0.0204022
101_130_BN005.wiff	Camk2b	FTDEYQLYEDIGK	FTDEYQLYEDIGK	30.46	4715	5			0.0150542
101_130_BN006.wiff	Camk2b	FTDEYQLYEDIGK	FTDEYQLYEDIGK	30.59	908	6			0.00289909
101_130_BN007.wiff	Camk2b	FTDEYQLYEDIGK	FTDEYQLYEDIGK	29.78	9492	7			0.0303063
101_130_BN008.wiff	Camk2b	FTDEYQLYEDIGK	FTDEYQLYEDIGK	30.44	5265	8			0.0168102
101_130_BN009.wiff	Camk2b	FTDEYQLYEDIGK	FTDEYQLYEDIGK	30.26	3023	9			0.00965192
101_130_BN010.wiff	Camk2b	FTDEYQLYEDIGK	FTDEYQLYEDIGK	29.79	5071	10			0.0161908
101_130_BN011.wiff	Camk2b	FTDEYQLYEDIGK	FTDEYQLYEDIGK	30.26	1787	11			0.00570558
101_130_BN012.wiff	Camk2b	FTDEYQLYEDIGK	FTDEYQLYEDIGK	30.23	2872	12			0.0091698
101_130_BN013.wiff	Camk2b	FTDEYQLYEDIGK	FTDEYQLYEDIGK	30.2	2457	13			0.00784478
101_130_BN014.wiff	Camk2b	FTDEYQLYEDIGK	FTDEYQLYEDIGK	30.18	5996	14			0.0191442
101_130_BN015.wiff	Camk2b	FTDEYQLYEDIGK	FTDEYQLYEDIGK	30.31	2850	15			0.00909956
101_130_BN016.wiff	Camk2b	FTDEYQLYEDIGK	FTDEYQLYEDIGK	30.08	4478	16			0.0142975
101_130_BN017.wiff	Camk2b	FTDEYQLYEDIGK	FTDEYQLYEDIGK	30.46	5653	17			0.0180491
101_130_BN018.wiff	Camk2b	FTDEYQLYEDIGK	FTDEYQLYEDIGK	30.53	3207	18			0.0102394
101_130_BN019.wiff	Camk2b	FTDEYQLYEDIGK	FTDEYQLYEDIGK	30.74	3265	19			0.0104246
101_130_BN020.wiff	Camk2b	FTDEYQLYEDIGK	FTDEYQLYEDIGK	30.41	4019	20			0.012832
101_130_BN021.wiff	Camk2b	FTDEYQLYEDIGK	FTDEYQLYEDIGK	30.6	3123	21			0.0099712
101_130_BN022.wiff	Camk2b	FTDEYQLYEDIGK	FTDEYQLYEDIGK	30.42	7250	22			0.023148
101_130_BN023.wiff	Camk2b	FTDEYQLYEDIGK	FTDEYQLYEDIGK	30.41	5446	23			0.0173881
101_130_BN024.wiff	Camk2b	FTDEYQLYEDIGK	FTDEYQLYEDIGK	30.55	9968	24			0.0318261
101_130_BN025.wiff	Camk2b	FTDEYQLYEDIGK	FTDEYQLYEDIGK	30.72	12541	25			0.0400413
101_130_BN026.wiff	Camk2b	FTDEYQLYEDIGK	FTDEYQLYEDIGK	32.68	4991	26			0.0159354
101_130_BN027.wiff	Camk2b	FTDEYQLYEDIGK	FTDEYQLYEDIGK	32.2	4397	27			0.0140389
101_130_BN028.wiff	Camk2b	FTDEYQLYEDIGK	FTDEYQLYEDIGK	30.76	64012	28			0.204379
101_130_BN029.wiff	Camk2b	FTDEYQLYEDIGK	FTDEYQLYEDIGK	30.59	57089	29			0.182275
101_130_BN030.wiff	Camk2b	FTDEYQLYEDIGK	FTDEYQLYEDIGK	30.23	67002	30			0.213926
101_130_BN001.wiff	Camk2b	FYFENLLAK	FYFENLLAK	38.1	1005	1		396796	0.00253279
101_130_BN002.wiff	Camk2b	FYFENLLAK	FYFENLLAK	38.26	1162	2			0.00292846
101_130_BN003.wiff	Camk2b	FYFENLLAK	FYFENLLAK	37.08	875	3			0.00220516
101_130_BN004.wiff	Camk2b	FYFENLLAK	FYFENLLAK	36.86	500	4			0.00126009
101_130_BN005.wiff	Camk2b	FYFENLLAK	FYFENLLAK	37.43	653	5			0.00164568
101_130_BN006.wiff	Camk2b	FYFENLLAK	FYFENLLAK	36.56	3456	6			0.00870977
101_130_BN007.wiff	Camk2b	FYFENLLAK	FYFENLLAK	36.62	3441	7			0.00867196
101_130_BN008.wiff	Camk2b	FYFENLLAK	FYFENLLAK	36.39	3977	8			0.0100228
101_130_BN009.wiff	Camk2b	FYFENLLAK	FYFENLLAK	36.63	3471	9			0.00874757
101_130_BN010.wiff	Camk2b	FYFENLLAK	FYFENLLAK	36.79	3214	10			0.00809988
101_130_BN011.wiff	Camk2b	FYFENLLAK	FYFENLLAK	36.42	2909	11			0.00733122
101_130_BN012.wiff	Camk2b	FYFENLLAK	FYFENLLAK	36.88	2902	12			0.00731358
101_130_BN013.wiff	Camk2b	FYFENLLAK	FYFENLLAK	36.85	3042	13			0.00766641
101_130_BN014.wiff	Camk2b	FYFENLLAK	FYFENLLAK	36.41	2204	14			0.00555449
101_130_BN015.wiff	Camk2b	FYFENLLAK	FYFENLLAK	36.72	3148	15			0.00793355
101_130_BN016.wiff	Camk2b	FYFENLLAK	FYFENLLAK	36.33	3206	16			0.00807972
101_130_BN017.wiff	Camk2b	FYFENLLAK	FYFENLLAK	36.75	1509	17			0.00380296
101_130_BN018.wiff	Camk2b	FYFENLLAK	FYFENLLAK	36.89	1659	18			0.00418099
101_130_BN019.wiff	Camk2b	FYFENLLAK	FYFENLLAK	37.04	2937	19			0.00740179
101_130_BN020.wiff	Camk2b	FYFENLLAK	FYFENLLAK	37	7124	20			0.0179538
101_130_BN021.wiff	Camk2b	FYFENLLAK	FYFENLLAK	36.76	3266	21			0.00823093
101_130_BN022.wiff	Camk2b	FYFENLLAK	FYFENLLAK	36.8	3878	22			0.00977328
101_130_BN023.wiff	Camk2b	FYFENLLAK	FYFENLLAK	36.93	5444	23			0.0137199
101_130_BN024.wiff	Camk2b	FYFENLLAK	FYFENLLAK	37.46	3704	24			0.00933477
101_130_BN025.wiff	Camk2b	FYFENLLAK	FYFENLLAK	37.71	2184	25			0.00550409
101_130_BN026.wiff	Camk2b	FYFENLLAK	FYFENLLAK	39.67	6629	26			0.0167063
101_130_BN027.wiff	Camk2b	FYFENLLAK	FYFENLLAK	39.15	7432	27			0.01873
101_130_BN028.wiff	Camk2b	FYFENLLAK	FYFENLLAK	37.13	118149	28			0.297758
101_130_BN029.wiff	Camk2b	FYFENLLAK	FYFENLLAK	36.8	86762	29			0.218656
101_130_BN030.wiff	Camk2b	FYFENLLAK	FYFENLLAK	36.28	106954	30			0.269544
101_130_BN001.wiff	Cdc42bpa serine/threonine-protein kinase MRCK alpha	FQFPAQVTDVSENAK	FQFPAQVTDVSENAK	29.86	195	1		402299	0.000484714
101_130_BN002.wiff	Cdc42bpa serine/threonine-protein kinase MRCK alpha	FQFPAQVTDVSENAK	FQFPAQVTDVSENAK	30.2	1370	2			0.00340543
101_130_BN003.wiff	Cdc42bpa serine/threonine-protein kinase MRCK alpha	FQFPAQVTDVSENAK	FQFPAQVTDVSENAK	29.59	4506	3			0.0112006
101_130_BN004.wiff	Cdc42bpa serine/threonine-protein kinase MRCK alpha	FQFPAQVTDVSENAK	FQFPAQVTDVSENAK	29.44	3399	4			0.00844894
101_130_BN005.wiff	Cdc42bpa serine/threonine-protein kinase MRCK alpha	FQFPAQVTDVSENAK	FQFPAQVTDVSENAK	29.58	2360	5			0.00586628
101_130_BN006.wiff	Cdc42bpa serine/threonine-protein kinase MRCK alpha	FQFPAQVTDVSENAK	FQFPAQVTDVSENAK	29.75	1892	6			0.00470297
101_130_BN007.wiff	Cdc42bpa serine/threonine-protein kinase MRCK alpha	FQFPAQVTDVSENAK	FQFPAQVTDVSENAK	29.68	1778	7			0.0044196
101_130_BN008.wiff	Cdc42bpa serine/threonine-protein kinase MRCK alpha	FQFPAQVTDVSENAK	FQFPAQVTDVSENAK	29.36	3294	8			0.00818794
101_130_BN009.wiff	Cdc42bpa serine/threonine-protein kinase MRCK alpha	FQFPAQVTDVSENAK	FQFPAQVTDVSENAK	29.57	2449	9			0.00608751
101_130_BN010.wiff	Cdc42bpa serine/threonine-protein kinase MRCK alpha	FQFPAQVTDVSENAK	FQFPAQVTDVSENAK	29.91	2127	10			0.00528711
101_130_BN011.wiff	Cdc42bpa serine/threonine-protein kinase MRCK alpha	FQFPAQVTDVSENAK	FQFPAQVTDVSENAK	29.57	3181	11			0.00790705
101_130_BN012.wiff	Cdc42bpa serine/threonine-protein kinase MRCK alpha	FQFPAQVTDVSENAK	FQFPAQVTDVSENAK	29.29	2624	12			0.00652251
101_130_BN013.wiff	Cdc42bpa serine/threonine-protein kinase MRCK alpha	FQFPAQVTDVSENAK	FQFPAQVTDVSENAK	29.51	2666	13			0.00662691
101_130_BN014.wiff	Cdc42bpa serine/threonine-protein kinase MRCK alpha	FQFPAQVTDVSENAK	FQFPAQVTDVSENAK	29.52	3172	14			0.00788468
101_130_BN015.wiff	Cdc42bpa serine/threonine-protein kinase MRCK alpha	FQFPAQVTDVSENAK	FQFPAQVTDVSENAK	29.36	1851	15			0.00460106
101_130_BN016.wiff	Cdc42bpa serine/threonine-protein kinase MRCK alpha	FQFPAQVTDVSENAK	FQFPAQVTDVSENAK	29.52	2254	16			0.0056028
101_130_BN017.wiff	Cdc42bpa serine/threonine-protein kinase MRCK alpha	FQFPAQVTDVSENAK	FQFPAQVTDVSENAK	29.55	3668	17			0.0091176
101_130_BN018.wiff	Cdc42bpa serine/threonine-protein kinase MRCK alpha	FQFPAQVTDVSENAK	FQFPAQVTDVSENAK	29.54	4954	18			0.0123142
101_130_BN019.wiff	Cdc42bpa serine/threonine-protein kinase MRCK alpha	FQFPAQVTDVSENAK	FQFPAQVTDVSENAK	29.68	5332	19			0.0132538
101_130_BN020.wiff	Cdc42bpa serine/threonine-protein kinase MRCK alpha	FQFPAQVTDVSENAK	FQFPAQVTDVSENAK	29.45	4172	20			0.0103704
101_130_BN021.wiff	Cdc42bpa serine/threonine-protein kinase MRCK alpha	FQFPAQVTDVSENAK	FQFPAQVTDVSENAK	29.43	4255	21			0.0105767
101_130_BN022.wiff	Cdc42bpa serine/threonine-protein kinase MRCK alpha	FQFPAQVTDVSENAK	FQFPAQVTDVSENAK	29.27	6333	22			0.015742
101_130_BN023.wiff	Cdc42bpa serine/threonine-protein kinase MRCK alpha	FQFPAQVTDVSENAK	FQFPAQVTDVSENAK	29.3	12629	23			0.0313921
101_130_BN024.wiff	Cdc42bpa serine/threonine-protein kinase MRCK alpha	FQFPAQVTDVSENAK	FQFPAQVTDVSENAK	29.37	23849	24			0.0592818
101_130_BN025.wiff	Cdc42bpa serine/threonine-protein kinase MRCK alpha	FQFPAQVTDVSENAK	FQFPAQVTDVSENAK	29.42	32296	25			0.0802786
101_130_BN026.wiff	Cdc42bpa serine/threonine-protein kinase MRCK alpha	FQFPAQVTDVSENAK	FQFPAQVTDVSENAK	31.12	55720	26			0.138504
101_130_BN027.wiff	Cdc42bpa serine/threonine-protein kinase MRCK alpha	FQFPAQVTDVSENAK	FQFPAQVTDVSENAK	30.3	68449	27			0.170145
101_130_BN028.wiff	Cdc42bpa serine/threonine-protein kinase MRCK alpha	FQFPAQVTDVSENAK	FQFPAQVTDVSENAK	29.38	79308	28			0.197137
101_130_BN029.wiff	Cdc42bpa serine/threonine-protein kinase MRCK alpha	FQFPAQVTDVSENAK	FQFPAQVTDVSENAK	29.25	33618	29			0.0835647
101_130_BN030.wiff	Cdc42bpa serine/threonine-protein kinase MRCK alpha	FQFPAQVTDVSENAK	FQFPAQVTDVSENAK	29.02	28598	30			0.0710864
101_130_BN001.wiff	Cdc42bpa serine/threonine-protein kinase MRCK alpha	TVFSGSVSIPSITK	TVFSGSVSIPSITK	31.24	1323	1		533714	0.00247886
101_130_BN002.wiff	Cdc42bpa serine/threonine-protein kinase MRCK alpha	TVFSGSVSIPSITK	TVFSGSVSIPSITK	31.28	1004	2			0.00188116
101_130_BN003.wiff	Cdc42bpa serine/threonine-protein kinase MRCK alpha	TVFSGSVSIPSITK	TVFSGSVSIPSITK	30.63	781	3			0.00146333
101_130_BN004.wiff	Cdc42bpa serine/threonine-protein kinase MRCK alpha	TVFSGSVSIPSITK	TVFSGSVSIPSITK	30.49	2046	4			0.00383351
101_130_BN005.wiff	Cdc42bpa serine/threonine-protein kinase MRCK alpha	TVFSGSVSIPSITK	TVFSGSVSIPSITK	30.68	1073	5			0.00201044
101_130_BN006.wiff	Cdc42bpa serine/threonine-protein kinase MRCK alpha	TVFSGSVSIPSITK	TVFSGSVSIPSITK	30.43	3330	6			0.0062393
101_130_BN007.wiff	Cdc42bpa serine/threonine-protein kinase MRCK alpha	TVFSGSVSIPSITK	TVFSGSVSIPSITK	30.4	3955	7			0.00741034
101_130_BN008.wiff	Cdc42bpa serine/threonine-protein kinase MRCK alpha	TVFSGSVSIPSITK	TVFSGSVSIPSITK	30.09	3980	8			0.00745718
101_130_BN009.wiff	Cdc42bpa serine/threonine-protein kinase MRCK alpha	TVFSGSVSIPSITK	TVFSGSVSIPSITK	30.05	4740	9			0.00888116
101_130_BN010.wiff	Cdc42bpa serine/threonine-protein kinase MRCK alpha	TVFSGSVSIPSITK	TVFSGSVSIPSITK	30.77	3588	10			0.0067227
101_130_BN011.wiff	Cdc42bpa serine/threonine-protein kinase MRCK alpha	TVFSGSVSIPSITK	TVFSGSVSIPSITK	30.1	2630	11			0.00492773
101_130_BN012.wiff	Cdc42bpa serine/threonine-protein kinase MRCK alpha	TVFSGSVSIPSITK	TVFSGSVSIPSITK	30.18	1945	12			0.00364427
101_130_BN013.wiff	Cdc42bpa serine/threonine-protein kinase MRCK alpha	TVFSGSVSIPSITK	TVFSGSVSIPSITK	30.01	5920	13			0.0110921
101_130_BN014.wiff	Cdc42bpa serine/threonine-protein kinase MRCK alpha	TVFSGSVSIPSITK	TVFSGSVSIPSITK	29.67	2185	14			0.00409395
101_130_BN015.wiff	Cdc42bpa serine/threonine-protein kinase MRCK alpha	TVFSGSVSIPSITK	TVFSGSVSIPSITK	30.32	1733	15			0.00324706
101_130_BN016.wiff	Cdc42bpa serine/threonine-protein kinase MRCK alpha	TVFSGSVSIPSITK	TVFSGSVSIPSITK	30.03	4412	16			0.0082666
101_130_BN017.wiff	Cdc42bpa serine/threonine-protein kinase MRCK alpha	TVFSGSVSIPSITK	TVFSGSVSIPSITK	30.16	3646	17			0.00683137
101_130_BN018.wiff	Cdc42bpa serine/threonine-protein kinase MRCK alpha	TVFSGSVSIPSITK	TVFSGSVSIPSITK	30.3	3254	18			0.0060969
101_130_BN019.wiff	Cdc42bpa serine/threonine-protein kinase MRCK alpha	TVFSGSVSIPSITK	TVFSGSVSIPSITK	30.89	2007	19			0.00376044
101_130_BN020.wiff	Cdc42bpa serine/threonine-protein kinase MRCK alpha	TVFSGSVSIPSITK	TVFSGSVSIPSITK	30.75	1442	20			0.00270182
101_130_BN021.wiff	Cdc42bpa serine/threonine-protein kinase MRCK alpha	TVFSGSVSIPSITK	TVFSGSVSIPSITK	30.78	5098	21			0.00955193
101_130_BN022.wiff	Cdc42bpa serine/threonine-protein kinase MRCK alpha	TVFSGSVSIPSITK	TVFSGSVSIPSITK	30.56	8572	22			0.016061
101_130_BN023.wiff	Cdc42bpa serine/threonine-protein kinase MRCK alpha	TVFSGSVSIPSITK	TVFSGSVSIPSITK	30.57	17894	23			0.0335273
101_130_BN024.wiff	Cdc42bpa serine/threonine-protein kinase MRCK alpha	TVFSGSVSIPSITK	TVFSGSVSIPSITK	30.71	43096	24			0.0807474
101_130_BN025.wiff	Cdc42bpa serine/threonine-protein kinase MRCK alpha	TVFSGSVSIPSITK	TVFSGSVSIPSITK	30.73	61620	25			0.115455
101_130_BN026.wiff	Cdc42bpa serine/threonine-protein kinase MRCK alpha	TVFSGSVSIPSITK	TVFSGSVSIPSITK	32.78	84174	26			0.157714
101_130_BN027.wiff	Cdc42bpa serine/threonine-protein kinase MRCK alpha	TVFSGSVSIPSITK	TVFSGSVSIPSITK	32.11	79023	27			0.148062
101_130_BN028.wiff	Cdc42bpa serine/threonine-protein kinase MRCK alpha	TVFSGSVSIPSITK	TVFSGSVSIPSITK	30.69	96868	28			0.181498
101_130_BN029.wiff	Cdc42bpa serine/threonine-protein kinase MRCK alpha	TVFSGSVSIPSITK	TVFSGSVSIPSITK	30.56	39570	29			0.0741408
101_130_BN030.wiff	Cdc42bpa serine/threonine-protein kinase MRCK alpha	TVFSGSVSIPSITK	TVFSGSVSIPSITK	30.16	42805	30			0.0802021
101_130_BN001.wiff	Dynamin-1	LQDAFSAIGQNADLDLPQIAVVGGQSAGK	LQDAFSAIGQNADLDLPQIAVVGGQSAGK	38.56	1166	1		743129	0.00156904
101_130_BN002.wiff	Dynamin-1	LQDAFSAIGQNADLDLPQIAVVGGQSAGK	LQDAFSAIGQNADLDLPQIAVVGGQSAGK	38.63	5290	2			0.00711855
101_130_BN003.wiff	Dynamin-1	LQDAFSAIGQNADLDLPQIAVVGGQSAGK	LQDAFSAIGQNADLDLPQIAVVGGQSAGK	38.21	4105	3			0.00552394
101_130_BN004.wiff	Dynamin-1	LQDAFSAIGQNADLDLPQIAVVGGQSAGK	LQDAFSAIGQNADLDLPQIAVVGGQSAGK	38.23	2888	4			0.00388627
101_130_BN005.wiff	Dynamin-1	LQDAFSAIGQNADLDLPQIAVVGGQSAGK	LQDAFSAIGQNADLDLPQIAVVGGQSAGK	38.02	3453	5			0.00464657
101_130_BN006.wiff	Dynamin-1	LQDAFSAIGQNADLDLPQIAVVGGQSAGK	LQDAFSAIGQNADLDLPQIAVVGGQSAGK	37.88	6834	6			0.00919625
101_130_BN007.wiff	Dynamin-1	LQDAFSAIGQNADLDLPQIAVVGGQSAGK	LQDAFSAIGQNADLDLPQIAVVGGQSAGK	37.67	5414	7			0.00728541
101_130_BN008.wiff	Dynamin-1	LQDAFSAIGQNADLDLPQIAVVGGQSAGK	LQDAFSAIGQNADLDLPQIAVVGGQSAGK	37.71	5907	8			0.00794882
101_130_BN009.wiff	Dynamin-1	LQDAFSAIGQNADLDLPQIAVVGGQSAGK	LQDAFSAIGQNADLDLPQIAVVGGQSAGK	37.55	4986	9			0.00670947
101_130_BN010.wiff	Dynamin-1	LQDAFSAIGQNADLDLPQIAVVGGQSAGK	LQDAFSAIGQNADLDLPQIAVVGGQSAGK	37.72	4254	10			0.00572444
101_130_BN011.wiff	Dynamin-1	LQDAFSAIGQNADLDLPQIAVVGGQSAGK	LQDAFSAIGQNADLDLPQIAVVGGQSAGK	37.72	6319	11			0.00850323
101_130_BN012.wiff	Dynamin-1	LQDAFSAIGQNADLDLPQIAVVGGQSAGK	LQDAFSAIGQNADLDLPQIAVVGGQSAGK	37.8	10696	12			0.0143932
101_130_BN013.wiff	Dynamin-1	LQDAFSAIGQNADLDLPQIAVVGGQSAGK	LQDAFSAIGQNADLDLPQIAVVGGQSAGK	37.71	31700	13			0.0426575
101_130_BN014.wiff	Dynamin-1	LQDAFSAIGQNADLDLPQIAVVGGQSAGK	LQDAFSAIGQNADLDLPQIAVVGGQSAGK	37.64	28513	14			0.0383688
101_130_BN015.wiff	Dynamin-1	LQDAFSAIGQNADLDLPQIAVVGGQSAGK	LQDAFSAIGQNADLDLPQIAVVGGQSAGK	37.88	24558	15			0.0330468
101_130_BN016.wiff	Dynamin-1	LQDAFSAIGQNADLDLPQIAVVGGQSAGK	LQDAFSAIGQNADLDLPQIAVVGGQSAGK	37.92	22948	16			0.0308802
101_130_BN017.wiff	Dynamin-1	LQDAFSAIGQNADLDLPQIAVVGGQSAGK	LQDAFSAIGQNADLDLPQIAVVGGQSAGK	38	34100	17			0.0458871
101_130_BN018.wiff	Dynamin-1	LQDAFSAIGQNADLDLPQIAVVGGQSAGK	LQDAFSAIGQNADLDLPQIAVVGGQSAGK	38.09	36457	18			0.0490588
101_130_BN019.wiff	Dynamin-1	LQDAFSAIGQNADLDLPQIAVVGGQSAGK	LQDAFSAIGQNADLDLPQIAVVGGQSAGK	38.23	22322	19			0.0300379
101_130_BN020.wiff	Dynamin-1	LQDAFSAIGQNADLDLPQIAVVGGQSAGK	LQDAFSAIGQNADLDLPQIAVVGGQSAGK	37.97	23147	20			0.031148
101_130_BN021.wiff	Dynamin-1	LQDAFSAIGQNADLDLPQIAVVGGQSAGK	LQDAFSAIGQNADLDLPQIAVVGGQSAGK	37.97	27216	21			0.0366235
101_130_BN022.wiff	Dynamin-1	LQDAFSAIGQNADLDLPQIAVVGGQSAGK	LQDAFSAIGQNADLDLPQIAVVGGQSAGK	37.99	25077	22			0.0337452
101_130_BN023.wiff	Dynamin-1	LQDAFSAIGQNADLDLPQIAVVGGQSAGK	LQDAFSAIGQNADLDLPQIAVVGGQSAGK	38.06	35017	23			0.047121
101_130_BN024.wiff	Dynamin-1	LQDAFSAIGQNADLDLPQIAVVGGQSAGK	LQDAFSAIGQNADLDLPQIAVVGGQSAGK	38.52	49688	24			0.0668632
101_130_BN025.wiff	Dynamin-1	LQDAFSAIGQNADLDLPQIAVVGGQSAGK	LQDAFSAIGQNADLDLPQIAVVGGQSAGK	38.66	52825	25			0.0710846
101_130_BN026.wiff	Dynamin-1	LQDAFSAIGQNADLDLPQIAVVGGQSAGK	LQDAFSAIGQNADLDLPQIAVVGGQSAGK	40.55	42716	26			0.0574813
101_130_BN027.wiff	Dynamin-1	LQDAFSAIGQNADLDLPQIAVVGGQSAGK	LQDAFSAIGQNADLDLPQIAVVGGQSAGK	40.22	55396	27			0.0745443
101_130_BN028.wiff	Dynamin-1	LQDAFSAIGQNADLDLPQIAVVGGQSAGK	LQDAFSAIGQNADLDLPQIAVVGGQSAGK	38.15	74194	28			0.09984
101_130_BN029.wiff	Dynamin-1	LQDAFSAIGQNADLDLPQIAVVGGQSAGK	LQDAFSAIGQNADLDLPQIAVVGGQSAGK	37.94	45033	29			0.0605992
101_130_BN030.wiff	Dynamin-1	LQDAFSAIGQNADLDLPQIAVVGGQSAGK	LQDAFSAIGQNADLDLPQIAVVGGQSAGK	37.56	50910	30			0.0685076
101_130_BN001.wiff	Dynamin-1	VLNQQLTNHIR	VLNQQLTNHIR	18.13	77	1		137633	0.000559459
101_130_BN002.wiff	Dynamin-1	VLNQQLTNHIR	VLNQQLTNHIR	18.37	195	2			0.00141681
101_130_BN003.wiff	Dynamin-1	VLNQQLTNHIR	VLNQQLTNHIR	18.28	142	3			0.00103173
101_130_BN004.wiff	Dynamin-1	VLNQQLTNHIR	VLNQQLTNHIR	18.14	340	4			0.00247034
101_130_BN005.wiff	Dynamin-1	VLNQQLTNHIR	VLNQQLTNHIR	18.1	260	5			0.00188908
101_130_BN006.wiff	Dynamin-1	VLNQQLTNHIR	VLNQQLTNHIR	18.14	153	6			0.00111165
101_130_BN007.wiff	Dynamin-1	VLNQQLTNHIR	VLNQQLTNHIR	17.97	473	7			0.00343668
101_130_BN008.wiff	Dynamin-1	VLNQQLTNHIR	VLNQQLTNHIR	17.89	568	8			0.00412692
101_130_BN009.wiff	Dynamin-1	VLNQQLTNHIR	VLNQQLTNHIR	17.86	355	9			0.00257932
101_130_BN010.wiff	Dynamin-1	VLNQQLTNHIR	VLNQQLTNHIR	17.85	1256	10			0.00912572
101_130_BN011.wiff	Dynamin-1	VLNQQLTNHIR	VLNQQLTNHIR	17.94	1865	11			0.0135505
101_130_BN012.wiff	Dynamin-1	VLNQQLTNHIR	VLNQQLTNHIR	17.93	2905	12			0.0211069
101_130_BN013.wiff	Dynamin-1	VLNQQLTNHIR	VLNQQLTNHIR	17.92	7568	13			0.0549868
101_130_BN014.wiff	Dynamin-1	VLNQQLTNHIR	VLNQQLTNHIR	17.86	6497	14			0.0472052
101_130_BN015.wiff	Dynamin-1	VLNQQLTNHIR	VLNQQLTNHIR	17.89	5411	15			0.0393147
101_130_BN016.wiff	Dynamin-1	VLNQQLTNHIR	VLNQQLTNHIR	18.01	4915	16			0.0357109
101_130_BN017.wiff	Dynamin-1	VLNQQLTNHIR	VLNQQLTNHIR	18.16	10083	17			0.07326
101_130_BN018.wiff	Dynamin-1	VLNQQLTNHIR	VLNQQLTNHIR	18.13	8388	18			0.0609447
101_130_BN019.wiff	Dynamin-1	VLNQQLTNHIR	VLNQQLTNHIR	18.24	5850	19			0.0425043
101_130_BN020.wiff	Dynamin-1	VLNQQLTNHIR	VLNQQLTNHIR	18.16	7329	20			0.0532503
101_130_BN021.wiff	Dynamin-1	VLNQQLTNHIR	VLNQQLTNHIR	18.1	5933	21			0.0431074
101_130_BN022.wiff	Dynamin-1	VLNQQLTNHIR	VLNQQLTNHIR	18.17	6878	22			0.0499735
101_130_BN023.wiff	Dynamin-1	VLNQQLTNHIR	VLNQQLTNHIR	18.16	6531	23			0.0474523
101_130_BN024.wiff	Dynamin-1	VLNQQLTNHIR	VLNQQLTNHIR	18.26	6491	24			0.0471617
101_130_BN025.wiff	Dynamin-1	VLNQQLTNHIR	VLNQQLTNHIR	18.25	5471	25			0.0397506
101_130_BN026.wiff	Dynamin-1	VLNQQLTNHIR	VLNQQLTNHIR	18.08	266	26			0.00193268
101_130_BN027.wiff	Dynamin-1	VLNQQLTNHIR	VLNQQLTNHIR	18.15	130	27			0.000944541
101_130_BN028.wiff	Dynamin-1	VLNQQLTNHIR	VLNQQLTNHIR	18.22	19384	28			0.140838
101_130_BN029.wiff	Dynamin-1	VLNQQLTNHIR	VLNQQLTNHIR	18.13	9719	29			0.0706153
101_130_BN030.wiff	Dynamin-1	VLNQQLTNHIR	VLNQQLTNHIR	17.81	12200	30			0.0886415
101_130_BN001.wiff	Grid2	AASGFAFGSVPEHR	AASGFAFGSVPEHR	23.86	228	1		222508	0.00102468
101_130_BN002.wiff	Grid2	AASGFAFGSVPEHR	AASGFAFGSVPEHR	23.84	691	2			0.00310551
101_130_BN003.wiff	Grid2	AASGFAFGSVPEHR	AASGFAFGSVPEHR	23.85	265	3			0.00119097
101_130_BN004.wiff	Grid2	AASGFAFGSVPEHR	AASGFAFGSVPEHR	24.11	343	4			0.00154152
101_130_BN005.wiff	Grid2	AASGFAFGSVPEHR	AASGFAFGSVPEHR	24.01	771	5			0.00346504
101_130_BN006.wiff	Grid2	AASGFAFGSVPEHR	AASGFAFGSVPEHR	24.03	547	6			0.00245834
101_130_BN007.wiff	Grid2	AASGFAFGSVPEHR	AASGFAFGSVPEHR	24.02	1119	7			0.00502903
101_130_BN008.wiff	Grid2	AASGFAFGSVPEHR	AASGFAFGSVPEHR	24.01	3628	8			0.016305
101_130_BN009.wiff	Grid2	AASGFAFGSVPEHR	AASGFAFGSVPEHR	23.91	3267	9			0.0146826
101_130_BN010.wiff	Grid2	AASGFAFGSVPEHR	AASGFAFGSVPEHR	23.96	3372	10			0.0151545
101_130_BN011.wiff	Grid2	AASGFAFGSVPEHR	AASGFAFGSVPEHR	23.87	908	11			0.00408075
101_130_BN012.wiff	Grid2	AASGFAFGSVPEHR	AASGFAFGSVPEHR	23.87	679	12			0.00305158
101_130_BN013.wiff	Grid2	AASGFAFGSVPEHR	AASGFAFGSVPEHR	23.72	663	13			0.00297967
101_130_BN014.wiff	Grid2	AASGFAFGSVPEHR	AASGFAFGSVPEHR	24.06	1108	14			0.0049796
101_130_BN015.wiff	Grid2	AASGFAFGSVPEHR	AASGFAFGSVPEHR	24.11	631	15			0.00283585
101_130_BN016.wiff	Grid2	AASGFAFGSVPEHR	AASGFAFGSVPEHR	23.85	1047	16			0.00470545
101_130_BN017.wiff	Grid2	AASGFAFGSVPEHR	AASGFAFGSVPEHR	23.97	613	17			0.00275496
101_130_BN018.wiff	Grid2	AASGFAFGSVPEHR	AASGFAFGSVPEHR	24.22	1312	18			0.00589642
101_130_BN019.wiff	Grid2	AASGFAFGSVPEHR	AASGFAFGSVPEHR	24.08	1342	19			0.00603124
101_130_BN020.wiff	Grid2	AASGFAFGSVPEHR	AASGFAFGSVPEHR	23.99	6796	20			0.0305427
101_130_BN021.wiff	Grid2	AASGFAFGSVPEHR	AASGFAFGSVPEHR	23.88	15606	21			0.0701368
101_130_BN022.wiff	Grid2	AASGFAFGSVPEHR	AASGFAFGSVPEHR	23.87	6998	22			0.0314506
101_130_BN023.wiff	Grid2	AASGFAFGSVPEHR	AASGFAFGSVPEHR	24.06	6109	23			0.0274552
101_130_BN024.wiff	Grid2	AASGFAFGSVPEHR	AASGFAFGSVPEHR	24.19	10454	24			0.0469826
101_130_BN025.wiff	Grid2	AASGFAFGSVPEHR	AASGFAFGSVPEHR	24.78	4517	25			0.0203004
101_130_BN026.wiff	Grid2	AASGFAFGSVPEHR	AASGFAFGSVPEHR	24.73	915	26			0.00411221
101_130_BN027.wiff	Grid2	AASGFAFGSVPEHR	AASGFAFGSVPEHR	24.41	1081	27			0.00485825
101_130_BN028.wiff	Grid2	AASGFAFGSVPEHR	AASGFAFGSVPEHR	24.02	32420	28			0.145703
101_130_BN029.wiff	Grid2	AASGFAFGSVPEHR	AASGFAFGSVPEHR	23.85	48261	29			0.216896
101_130_BN030.wiff	Grid2	AASGFAFGSVPEHR	AASGFAFGSVPEHR	23.63	66817	30			0.30029
101_130_BN001.wiff	Grid2	VVTVLEEPFVMVSENVLGKPK	VVTVLEEPFVM[+16]VSENVLGKPK	40.23	2026	1		1111412	0.00182291
101_130_BN002.wiff	Grid2	VVTVLEEPFVMVSENVLGKPK	VVTVLEEPFVM[+16]VSENVLGKPK	40.92	30649	2			0.0275766
101_130_BN003.wiff	Grid2	VVTVLEEPFVMVSENVLGKPK	VVTVLEEPFVM[+16]VSENVLGKPK	39.25	3213	3			0.00289092
101_130_BN004.wiff	Grid2	VVTVLEEPFVMVSENVLGKPK	VVTVLEEPFVM[+16]VSENVLGKPK	38.42	6533	4			0.00587811
101_130_BN005.wiff	Grid2	VVTVLEEPFVMVSENVLGKPK	VVTVLEEPFVM[+16]VSENVLGKPK	38.46	23875	5			0.0214817
101_130_BN006.wiff	Grid2	VVTVLEEPFVMVSENVLGKPK	VVTVLEEPFVM[+16]VSENVLGKPK	38.94	8179	6			0.00735911
101_130_BN007.wiff	Grid2	VVTVLEEPFVMVSENVLGKPK	VVTVLEEPFVM[+16]VSENVLGKPK	38.95	14959	7			0.0134595
101_130_BN008.wiff	Grid2	VVTVLEEPFVMVSENVLGKPK	VVTVLEEPFVM[+16]VSENVLGKPK	38.81	37521	8			0.0337598
101_130_BN009.wiff	Grid2	VVTVLEEPFVMVSENVLGKPK	VVTVLEEPFVM[+16]VSENVLGKPK	38.06	11011	9			0.00990722
101_130_BN010.wiff	Grid2	VVTVLEEPFVMVSENVLGKPK	VVTVLEEPFVM[+16]VSENVLGKPK	38.79	24666	10			0.0221934
101_130_BN011.wiff	Grid2	VVTVLEEPFVMVSENVLGKPK	VVTVLEEPFVM[+16]VSENVLGKPK	38.7	14285	11			0.012853
101_130_BN012.wiff	Grid2	VVTVLEEPFVMVSENVLGKPK	VVTVLEEPFVM[+16]VSENVLGKPK	38.23	5888	12			0.00529777
101_130_BN013.wiff	Grid2	VVTVLEEPFVMVSENVLGKPK	VVTVLEEPFVM[+16]VSENVLGKPK	38.7	15593	13			0.0140299
101_130_BN014.wiff	Grid2	VVTVLEEPFVMVSENVLGKPK	VVTVLEEPFVM[+16]VSENVLGKPK	38	13982	14			0.0125804
101_130_BN015.wiff	Grid2	VVTVLEEPFVMVSENVLGKPK	VVTVLEEPFVM[+16]VSENVLGKPK	38.81	13329	15			0.0119929
101_130_BN016.wiff	Grid2	VVTVLEEPFVMVSENVLGKPK	VVTVLEEPFVM[+16]VSENVLGKPK	38.3	12873	16			0.0115826
101_130_BN017.wiff	Grid2	VVTVLEEPFVMVSENVLGKPK	VVTVLEEPFVM[+16]VSENVLGKPK	38.46	14343	17			0.0129052
101_130_BN018.wiff	Grid2	VVTVLEEPFVMVSENVLGKPK	VVTVLEEPFVM[+16]VSENVLGKPK	38.42	19076	18			0.0171638
101_130_BN019.wiff	Grid2	VVTVLEEPFVMVSENVLGKPK	VVTVLEEPFVM[+16]VSENVLGKPK	39.1	16196	19			0.0145725
101_130_BN020.wiff	Grid2	VVTVLEEPFVMVSENVLGKPK	VVTVLEEPFVM[+16]VSENVLGKPK	38.9	22741	20			0.0204614
101_130_BN021.wiff	Grid2	VVTVLEEPFVMVSENVLGKPK	VVTVLEEPFVM[+16]VSENVLGKPK	38.85	14733	21			0.0132561
101_130_BN022.wiff	Grid2	VVTVLEEPFVMVSENVLGKPK	VVTVLEEPFVM[+16]VSENVLGKPK	38.91	11649	22			0.0104813
101_130_BN023.wiff	Grid2	VVTVLEEPFVMVSENVLGKPK	VVTVLEEPFVM[+16]VSENVLGKPK	38.41	8902	23			0.00800963
101_130_BN024.wiff	Grid2	VVTVLEEPFVMVSENVLGKPK	VVTVLEEPFVM[+16]VSENVLGKPK	38.25	100691	24			0.0905974
101_130_BN025.wiff	Grid2	VVTVLEEPFVMVSENVLGKPK	VVTVLEEPFVM[+16]VSENVLGKPK	39.06	130265	25			0.117207
101_130_BN026.wiff	Grid2	VVTVLEEPFVMVSENVLGKPK	VVTVLEEPFVM[+16]VSENVLGKPK	42.62	14368	26			0.0129277
101_130_BN027.wiff	Grid2	VVTVLEEPFVMVSENVLGKPK	VVTVLEEPFVM[+16]VSENVLGKPK	42.32	14772	27			0.0132912
101_130_BN028.wiff	Grid2	VVTVLEEPFVMVSENVLGKPK	VVTVLEEPFVM[+16]VSENVLGKPK	39.44	116511	28			0.104832
101_130_BN029.wiff	Grid2	VVTVLEEPFVMVSENVLGKPK	VVTVLEEPFVM[+16]VSENVLGKPK	38.76	174948	29			0.157411
101_130_BN030.wiff	Grid2	VVTVLEEPFVMVSENVLGKPK	VVTVLEEPFVM[+16]VSENVLGKPK	38.33	213635	30			0.192219
101_130_BN001.wiff	Homer3	ANTVYGLGFASEQQLTQFAEK	ANTVYGLGFASEQQLTQFAEK	36.29	1655	1		3585677	0.000461559
101_130_BN002.wiff	Homer3	ANTVYGLGFASEQQLTQFAEK	ANTVYGLGFASEQQLTQFAEK	35.58	4355	2			0.00121455
101_130_BN003.wiff	Homer3	ANTVYGLGFASEQQLTQFAEK	ANTVYGLGFASEQQLTQFAEK	35.91	4127	3			0.00115097
101_130_BN004.wiff	Homer3	ANTVYGLGFASEQQLTQFAEK	ANTVYGLGFASEQQLTQFAEK	35.81	4916	4			0.00137101
101_130_BN005.wiff	Homer3	ANTVYGLGFASEQQLTQFAEK	ANTVYGLGFASEQQLTQFAEK	35.83	7524	5			0.00209835
101_130_BN006.wiff	Homer3	ANTVYGLGFASEQQLTQFAEK	ANTVYGLGFASEQQLTQFAEK	35.67	30785	6			0.00858555
101_130_BN007.wiff	Homer3	ANTVYGLGFASEQQLTQFAEK	ANTVYGLGFASEQQLTQFAEK	35.58	59957	7			0.0167212
101_130_BN008.wiff	Homer3	ANTVYGLGFASEQQLTQFAEK	ANTVYGLGFASEQQLTQFAEK	35.56	91721	8			0.0255798
101_130_BN009.wiff	Homer3	ANTVYGLGFASEQQLTQFAEK	ANTVYGLGFASEQQLTQFAEK	35.5	55043	9			0.0153508
101_130_BN010.wiff	Homer3	ANTVYGLGFASEQQLTQFAEK	ANTVYGLGFASEQQLTQFAEK	35.61	98375	10			0.0274355
101_130_BN011.wiff	Homer3	ANTVYGLGFASEQQLTQFAEK	ANTVYGLGFASEQQLTQFAEK	35.51	152908	11			0.0426441
101_130_BN012.wiff	Homer3	ANTVYGLGFASEQQLTQFAEK	ANTVYGLGFASEQQLTQFAEK	35.56	129988	12			0.036252
101_130_BN013.wiff	Homer3	ANTVYGLGFASEQQLTQFAEK	ANTVYGLGFASEQQLTQFAEK	35.5	148955	13			0.0415417
101_130_BN014.wiff	Homer3	ANTVYGLGFASEQQLTQFAEK	ANTVYGLGFASEQQLTQFAEK	35.43	131176	14			0.0365833
101_130_BN015.wiff	Homer3	ANTVYGLGFASEQQLTQFAEK	ANTVYGLGFASEQQLTQFAEK	35.6	95745	15			0.0267021
101_130_BN016.wiff	Homer3	ANTVYGLGFASEQQLTQFAEK	ANTVYGLGFASEQQLTQFAEK	35.63	112722	16			0.0314367
101_130_BN017.wiff	Homer3	ANTVYGLGFASEQQLTQFAEK	ANTVYGLGFASEQQLTQFAEK	35.76	141333	17			0.039416
101_130_BN018.wiff	Homer3	ANTVYGLGFASEQQLTQFAEK	ANTVYGLGFASEQQLTQFAEK	35.8	133964	18			0.0373609
101_130_BN019.wiff	Homer3	ANTVYGLGFASEQQLTQFAEK	ANTVYGLGFASEQQLTQFAEK	35.94	87293	19			0.0243449
101_130_BN020.wiff	Homer3	ANTVYGLGFASEQQLTQFAEK	ANTVYGLGFASEQQLTQFAEK	35.73	77862	20			0.0217147
101_130_BN021.wiff	Homer3	ANTVYGLGFASEQQLTQFAEK	ANTVYGLGFASEQQLTQFAEK	35.7	64971	21			0.0181196
101_130_BN022.wiff	Homer3	ANTVYGLGFASEQQLTQFAEK	ANTVYGLGFASEQQLTQFAEK	35.75	51117	22			0.0142559
101_130_BN023.wiff	Homer3	ANTVYGLGFASEQQLTQFAEK	ANTVYGLGFASEQQLTQFAEK	35.79	56570	23			0.0157767
101_130_BN024.wiff	Homer3	ANTVYGLGFASEQQLTQFAEK	ANTVYGLGFASEQQLTQFAEK	36.21	97205	24			0.0271092
101_130_BN025.wiff	Homer3	ANTVYGLGFASEQQLTQFAEK	ANTVYGLGFASEQQLTQFAEK	36.44	116153	25			0.0323936
101_130_BN026.wiff	Homer3	ANTVYGLGFASEQQLTQFAEK	ANTVYGLGFASEQQLTQFAEK	39.83	614004	26			0.171238
101_130_BN027.wiff	Homer3	ANTVYGLGFASEQQLTQFAEK	ANTVYGLGFASEQQLTQFAEK	38.48	565723	27			0.157773
101_130_BN028.wiff	Homer3	ANTVYGLGFASEQQLTQFAEK	ANTVYGLGFASEQQLTQFAEK	35.94	254770	28			0.0710521
101_130_BN029.wiff	Homer3	ANTVYGLGFASEQQLTQFAEK	ANTVYGLGFASEQQLTQFAEK	35.71	98457	29			0.0274584
101_130_BN030.wiff	Homer3	ANTVYGLGFASEQQLTQFAEK	ANTVYGLGFASEQQLTQFAEK	35.38	96303	30			0.0268577
101_130_BN001.wiff	Homer3	EAPDTAEREETQQQVQDLETR	EAPDTAEREETQQQVQDLETR	21.65	316	1		529903	0.000596336
101_130_BN002.wiff	Homer3	EAPDTAEREETQQQVQDLETR	EAPDTAEREETQQQVQDLETR	21.17	115	2			0.000217021
101_130_BN003.wiff	Homer3	EAPDTAEREETQQQVQDLETR	EAPDTAEREETQQQVQDLETR	21.28	1341	3			0.00253065
101_130_BN004.wiff	Homer3	EAPDTAEREETQQQVQDLETR	EAPDTAEREETQQQVQDLETR	20.9	2151	4			0.00405923
101_130_BN005.wiff	Homer3	EAPDTAEREETQQQVQDLETR	EAPDTAEREETQQQVQDLETR	20.97	4655	5			0.00878463
101_130_BN006.wiff	Homer3	EAPDTAEREETQQQVQDLETR	EAPDTAEREETQQQVQDLETR	20.95	8570	6			0.0161728
101_130_BN007.wiff	Homer3	EAPDTAEREETQQQVQDLETR	EAPDTAEREETQQQVQDLETR	20.85	21030	7			0.0396865
101_130_BN008.wiff	Homer3	EAPDTAEREETQQQVQDLETR	EAPDTAEREETQQQVQDLETR	20.84	22984	8			0.043374
101_130_BN009.wiff	Homer3	EAPDTAEREETQQQVQDLETR	EAPDTAEREETQQQVQDLETR	20.84	17412	9			0.0328588
101_130_BN010.wiff	Homer3	EAPDTAEREETQQQVQDLETR	EAPDTAEREETQQQVQDLETR	20.85	36570	10			0.0690126
101_130_BN011.wiff	Homer3	EAPDTAEREETQQQVQDLETR	EAPDTAEREETQQQVQDLETR	20.85	18599	11			0.0350989
101_130_BN012.wiff	Homer3	EAPDTAEREETQQQVQDLETR	EAPDTAEREETQQQVQDLETR	20.84	25694	12			0.0484881
101_130_BN013.wiff	Homer3	EAPDTAEREETQQQVQDLETR	EAPDTAEREETQQQVQDLETR	20.83	13785	13			0.0260142
101_130_BN014.wiff	Homer3	EAPDTAEREETQQQVQDLETR	EAPDTAEREETQQQVQDLETR	20.8	29582	14			0.0558253
101_130_BN015.wiff	Homer3	EAPDTAEREETQQQVQDLETR	EAPDTAEREETQQQVQDLETR	20.86	21745	15			0.0410358
101_130_BN016.wiff	Homer3	EAPDTAEREETQQQVQDLETR	EAPDTAEREETQQQVQDLETR	20.94	25251	16			0.0476521
101_130_BN017.wiff	Homer3	EAPDTAEREETQQQVQDLETR	EAPDTAEREETQQQVQDLETR	21.03	24030	17			0.0453479
101_130_BN018.wiff	Homer3	EAPDTAEREETQQQVQDLETR	EAPDTAEREETQQQVQDLETR	21.06	31156	18			0.0587957
101_130_BN019.wiff	Homer3	EAPDTAEREETQQQVQDLETR	EAPDTAEREETQQQVQDLETR	21.11	20361	19			0.038424
101_130_BN020.wiff	Homer3	EAPDTAEREETQQQVQDLETR	EAPDTAEREETQQQVQDLETR	21	17059	20			0.0321927
101_130_BN021.wiff	Homer3	EAPDTAEREETQQQVQDLETR	EAPDTAEREETQQQVQDLETR	21	18482	21			0.0348781
101_130_BN022.wiff	Homer3	EAPDTAEREETQQQVQDLETR	EAPDTAEREETQQQVQDLETR	21.07	11389	22			0.0214926
101_130_BN023.wiff	Homer3	EAPDTAEREETQQQVQDLETR	EAPDTAEREETQQQVQDLETR	20.99	12793	23			0.0241422
101_130_BN024.wiff	Homer3	EAPDTAEREETQQQVQDLETR	EAPDTAEREETQQQVQDLETR	21.04	11215	24			0.0211643
101_130_BN025.wiff	Homer3	EAPDTAEREETQQQVQDLETR	EAPDTAEREETQQQVQDLETR	21.07	10311	25			0.0194583
101_130_BN026.wiff	Homer3	EAPDTAEREETQQQVQDLETR	EAPDTAEREETQQQVQDLETR	24.54	45895	26			0.0866102
101_130_BN027.wiff	Homer3	EAPDTAEREETQQQVQDLETR	EAPDTAEREETQQQVQDLETR	24.35	33931	27			0.0640325
101_130_BN028.wiff	Homer3	EAPDTAEREETQQQVQDLETR	EAPDTAEREETQQQVQDLETR	21.05	11609	28			0.0219078
101_130_BN029.wiff	Homer3	EAPDTAEREETQQQVQDLETR	EAPDTAEREETQQQVQDLETR	20.96	14572	29			0.0274994
101_130_BN030.wiff	Homer3	EAPDTAEREETQQQVQDLETR	EAPDTAEREETQQQVQDLETR	20.83	17300	30			0.0326475
101_130_BN001.wiff	LPPR4	ESMVTFSNTLPR	ESM[+16]VTFSNTLPR	25.03	522	1		245606	0.00212536
101_130_BN002.wiff	LPPR4	ESMVTFSNTLPR	ESM[+16]VTFSNTLPR	24.48	1144	2			0.00465787
101_130_BN003.wiff	LPPR4	ESMVTFSNTLPR	ESM[+16]VTFSNTLPR	24.75	1836	3			0.00747539
101_130_BN004.wiff	LPPR4	ESMVTFSNTLPR	ESM[+16]VTFSNTLPR	24.59	2053	4			0.00835892
101_130_BN005.wiff	LPPR4	ESMVTFSNTLPR	ESM[+16]VTFSNTLPR	23.73	426	5			0.00173449
101_130_BN006.wiff	LPPR4	ESMVTFSNTLPR	ESM[+16]VTFSNTLPR	24.09	2545	6			0.0103621
101_130_BN007.wiff	LPPR4	ESMVTFSNTLPR	ESM[+16]VTFSNTLPR	24.04	4102	7			0.0167015
101_130_BN008.wiff	LPPR4	ESMVTFSNTLPR	ESM[+16]VTFSNTLPR	24.13	1992	8			0.00811055
101_130_BN009.wiff	LPPR4	ESMVTFSNTLPR	ESM[+16]VTFSNTLPR	24.06	1051	9			0.00427921
101_130_BN010.wiff	LPPR4	ESMVTFSNTLPR	ESM[+16]VTFSNTLPR	24.16	1956	10			0.00796397
101_130_BN011.wiff	LPPR4	ESMVTFSNTLPR	ESM[+16]VTFSNTLPR	24.06	791	11			0.00322061
101_130_BN012.wiff	LPPR4	ESMVTFSNTLPR	ESM[+16]VTFSNTLPR	24.11	382	12			0.00155534
101_130_BN013.wiff	LPPR4	ESMVTFSNTLPR	ESM[+16]VTFSNTLPR	24.1	353	13			0.00143726
101_130_BN014.wiff	LPPR4	ESMVTFSNTLPR	ESM[+16]VTFSNTLPR	24.39	818	14			0.00333054
101_130_BN015.wiff	LPPR4	ESMVTFSNTLPR	ESM[+16]VTFSNTLPR	24.21	823	15			0.0033509
101_130_BN016.wiff	LPPR4	ESMVTFSNTLPR	ESM[+16]VTFSNTLPR	24.52	461	16			0.00187699
101_130_BN017.wiff	LPPR4	ESMVTFSNTLPR	ESM[+16]VTFSNTLPR	24.34	1224	17			0.00498359
101_130_BN018.wiff	LPPR4	ESMVTFSNTLPR	ESM[+16]VTFSNTLPR	24.33	1184	18			0.00482073
101_130_BN019.wiff	LPPR4	ESMVTFSNTLPR	ESM[+16]VTFSNTLPR	24.69	3133	19			0.0127562
101_130_BN020.wiff	LPPR4	ESMVTFSNTLPR	ESM[+16]VTFSNTLPR	24.57	11333	20			0.046143
101_130_BN021.wiff	LPPR4	ESMVTFSNTLPR	ESM[+16]VTFSNTLPR	24.53	20655	21			0.0840981
101_130_BN022.wiff	LPPR4	ESMVTFSNTLPR	ESM[+16]VTFSNTLPR	24.58	35572	22			0.144834
101_130_BN023.wiff	LPPR4	ESMVTFSNTLPR	ESM[+16]VTFSNTLPR	24.59	19564	23			0.079656
101_130_BN024.wiff	LPPR4	ESMVTFSNTLPR	ESM[+16]VTFSNTLPR	24.65	22016	24			0.0896395
101_130_BN025.wiff	LPPR4	ESMVTFSNTLPR	ESM[+16]VTFSNTLPR	24.65	14437	25			0.0587811
101_130_BN026.wiff	LPPR4	ESMVTFSNTLPR	ESM[+16]VTFSNTLPR	25.76	29668	26			0.120795
101_130_BN027.wiff	LPPR4	ESMVTFSNTLPR	ESM[+16]VTFSNTLPR	25.46	36718	27			0.1495
101_130_BN028.wiff	LPPR4	ESMVTFSNTLPR	ESM[+16]VTFSNTLPR	24.69	17977	28			0.0731945
101_130_BN029.wiff	LPPR4	ESMVTFSNTLPR	ESM[+16]VTFSNTLPR	24.54	5855	29			0.023839
101_130_BN030.wiff	LPPR4	ESMVTFSNTLPR	ESM[+16]VTFSNTLPR	24.34	5015	30			0.0204189
101_130_BN001.wiff	LPPRP4	VTPVEGSEIGSETLSVSSSR	VTPVEGSEIGSETLSVSSSR	26.13	1096	1		300504	0.00364721
101_130_BN002.wiff	LPPRP4	VTPVEGSEIGSETLSVSSSR	VTPVEGSEIGSETLSVSSSR	26.43	6696	2			0.0222826
101_130_BN003.wiff	LPPRP4	VTPVEGSEIGSETLSVSSSR	VTPVEGSEIGSETLSVSSSR	25.71	1323	3			0.0044026
101_130_BN004.wiff	LPPRP4	VTPVEGSEIGSETLSVSSSR	VTPVEGSEIGSETLSVSSSR	25.75	3788	4			0.0126055
101_130_BN005.wiff	LPPRP4	VTPVEGSEIGSETLSVSSSR	VTPVEGSEIGSETLSVSSSR	25.52	6114	5			0.0203458
101_130_BN006.wiff	LPPRP4	VTPVEGSEIGSETLSVSSSR	VTPVEGSEIGSETLSVSSSR	25.53	1958	6			0.00651572
101_130_BN007.wiff	LPPRP4	VTPVEGSEIGSETLSVSSSR	VTPVEGSEIGSETLSVSSSR	25.59	1169	7			0.00389013
101_130_BN008.wiff	LPPRP4	VTPVEGSEIGSETLSVSSSR	VTPVEGSEIGSETLSVSSSR	25.48	4886	8			0.0162594
101_130_BN009.wiff	LPPRP4	VTPVEGSEIGSETLSVSSSR	VTPVEGSEIGSETLSVSSSR	25.14	2016	9			0.00670873
101_130_BN010.wiff	LPPRP4	VTPVEGSEIGSETLSVSSSR	VTPVEGSEIGSETLSVSSSR	25.48	2938	10			0.00977691
101_130_BN011.wiff	LPPRP4	VTPVEGSEIGSETLSVSSSR	VTPVEGSEIGSETLSVSSSR	25.45	2241	11			0.00745747
101_130_BN012.wiff	LPPRP4	VTPVEGSEIGSETLSVSSSR	VTPVEGSEIGSETLSVSSSR	25.41	644	12			0.00214307
101_130_BN013.wiff	LPPRP4	VTPVEGSEIGSETLSVSSSR	VTPVEGSEIGSETLSVSSSR	25.42	3063	13			0.0101929
101_130_BN014.wiff	LPPRP4	VTPVEGSEIGSETLSVSSSR	VTPVEGSEIGSETLSVSSSR	25.32	2384	14			0.00793334
101_130_BN015.wiff	LPPRP4	VTPVEGSEIGSETLSVSSSR	VTPVEGSEIGSETLSVSSSR	25.43	3991	15			0.013281
101_130_BN016.wiff	LPPRP4	VTPVEGSEIGSETLSVSSSR	VTPVEGSEIGSETLSVSSSR	25.51	3641	16			0.0121163
101_130_BN017.wiff	LPPRP4	VTPVEGSEIGSETLSVSSSR	VTPVEGSEIGSETLSVSSSR	25.62	2421	17			0.00805647
101_130_BN018.wiff	LPPRP4	VTPVEGSEIGSETLSVSSSR	VTPVEGSEIGSETLSVSSSR	25.61	5255	18			0.0174873
101_130_BN019.wiff	LPPRP4	VTPVEGSEIGSETLSVSSSR	VTPVEGSEIGSETLSVSSSR	25.66	3930	19			0.013078
101_130_BN020.wiff	LPPRP4	VTPVEGSEIGSETLSVSSSR	VTPVEGSEIGSETLSVSSSR	25.56	17336	20			0.0576897
101_130_BN021.wiff	LPPRP4	VTPVEGSEIGSETLSVSSSR	VTPVEGSEIGSETLSVSSSR	25.53	32985	21			0.109766
101_130_BN022.wiff	LPPRP4	VTPVEGSEIGSETLSVSSSR	VTPVEGSEIGSETLSVSSSR	25.55	36279	22			0.120727
101_130_BN023.wiff	LPPRP4	VTPVEGSEIGSETLSVSSSR	VTPVEGSEIGSETLSVSSSR	25.54	29956	23			0.0996859
101_130_BN024.wiff	LPPRP4	VTPVEGSEIGSETLSVSSSR	VTPVEGSEIGSETLSVSSSR	25.58	28721	24			0.0955761
101_130_BN025.wiff	LPPRP4	VTPVEGSEIGSETLSVSSSR	VTPVEGSEIGSETLSVSSSR	25.58	26811	25			0.0892201
101_130_BN026.wiff	LPPRP4	VTPVEGSEIGSETLSVSSSR	VTPVEGSEIGSETLSVSSSR	24.87	3890	26			0.0129449
101_130_BN027.wiff	LPPRP4	VTPVEGSEIGSETLSVSSSR	VTPVEGSEIGSETLSVSSSR	26.41	3694	27			0.0122927
101_130_BN028.wiff	LPPRP4	VTPVEGSEIGSETLSVSSSR	VTPVEGSEIGSETLSVSSSR	25.62	26442	28			0.0879922
101_130_BN029.wiff	LPPRP4	VTPVEGSEIGSETLSVSSSR	VTPVEGSEIGSETLSVSSSR	25.53	12835	29			0.0427116
101_130_BN030.wiff	LPPRP4	VTPVEGSEIGSETLSVSSSR	VTPVEGSEIGSETLSVSSSR	25.3	22001	30			0.0732137
101_130_BN001.wiff	ltpr1	AVLNPTNADILIETK	AVLNPTNADILIETK	32.34	3430	1		345292	0.00993362
101_130_BN002.wiff	ltpr1	AVLNPTNADILIETK	AVLNPTNADILIETK	31.98	1289	2			0.00373307
101_130_BN003.wiff	ltpr1	AVLNPTNADILIETK	AVLNPTNADILIETK	30.85	1143	3			0.00331024
101_130_BN004.wiff	ltpr1	AVLNPTNADILIETK	AVLNPTNADILIETK	31.15	2659	4			0.00770073
101_130_BN005.wiff	ltpr1	AVLNPTNADILIETK	AVLNPTNADILIETK	30.85	1349	5			0.00390684
101_130_BN006.wiff	ltpr1	AVLNPTNADILIETK	AVLNPTNADILIETK	30.92	2426	6			0.00702594
101_130_BN007.wiff	ltpr1	AVLNPTNADILIETK	AVLNPTNADILIETK	30.77	5797	7			0.0167887
101_130_BN008.wiff	ltpr1	AVLNPTNADILIETK	AVLNPTNADILIETK	30.85	3342	8			0.00967876
101_130_BN009.wiff	ltpr1	AVLNPTNADILIETK	AVLNPTNADILIETK	30.78	6299	9			0.0182425
101_130_BN010.wiff	ltpr1	AVLNPTNADILIETK	AVLNPTNADILIETK	30.87	7126	10			0.0206376
101_130_BN011.wiff	ltpr1	AVLNPTNADILIETK	AVLNPTNADILIETK	30.86	3213	11			0.00930517
101_130_BN012.wiff	ltpr1	AVLNPTNADILIETK	AVLNPTNADILIETK	31.09	2730	12			0.00790635
101_130_BN013.wiff	ltpr1	AVLNPTNADILIETK	AVLNPTNADILIETK	30.76	6144	13			0.0177936
101_130_BN014.wiff	ltpr1	AVLNPTNADILIETK	AVLNPTNADILIETK	30.77	6880	14			0.0199252
101_130_BN015.wiff	ltpr1	AVLNPTNADILIETK	AVLNPTNADILIETK	30.83	5512	15			0.0159633
101_130_BN016.wiff	ltpr1	AVLNPTNADILIETK	AVLNPTNADILIETK	30.86	5155	16			0.0149294
101_130_BN017.wiff	ltpr1	AVLNPTNADILIETK	AVLNPTNADILIETK	30.92	9239	17			0.0267571
101_130_BN018.wiff	ltpr1	AVLNPTNADILIETK	AVLNPTNADILIETK	31.33	2523	18			0.00730686
101_130_BN019.wiff	ltpr1	AVLNPTNADILIETK	AVLNPTNADILIETK	30.99	8815	19			0.0255291
101_130_BN020.wiff	ltpr1	AVLNPTNADILIETK	AVLNPTNADILIETK	31.18	3343	20			0.00968166
101_130_BN021.wiff	ltpr1	AVLNPTNADILIETK	AVLNPTNADILIETK	30.75	7921	21			0.02294
101_130_BN022.wiff	ltpr1	AVLNPTNADILIETK	AVLNPTNADILIETK	31.21	2741	22			0.00793821
101_130_BN023.wiff	ltpr1	AVLNPTNADILIETK	AVLNPTNADILIETK	31.24	5961	23			0.0172636
101_130_BN024.wiff	ltpr1	AVLNPTNADILIETK	AVLNPTNADILIETK	31.29	6958	24			0.0201511
101_130_BN025.wiff	ltpr1	AVLNPTNADILIETK	AVLNPTNADILIETK	31.83	1565	25			0.0045324
101_130_BN026.wiff	ltpr1	AVLNPTNADILIETK	AVLNPTNADILIETK	33.74	19879	26			0.0575716
101_130_BN027.wiff	ltpr1	AVLNPTNADILIETK	AVLNPTNADILIETK	33.08	34539	27			0.100028
101_130_BN028.wiff	ltpr1	AVLNPTNADILIETK	AVLNPTNADILIETK	31.37	92847	28			0.268894
101_130_BN029.wiff	ltpr1	AVLNPTNADILIETK	AVLNPTNADILIETK	31.2	46581	29			0.134903
101_130_BN030.wiff	ltpr1	AVLNPTNADILIETK	AVLNPTNADILIETK	30.81	37886	30			0.109722
101_130_BN001.wiff	ltpr1	LQDIVSALEDR	LQDIVSALEDR	32.22	3623	1		269627	0.0134371
101_130_BN002.wiff	ltpr1	LQDIVSALEDR	LQDIVSALEDR	32.45	2218	2			0.00822618
101_130_BN003.wiff	ltpr1	LQDIVSALEDR	LQDIVSALEDR	31.79	5914	3			0.021934
101_130_BN004.wiff	ltpr1	LQDIVSALEDR	LQDIVSALEDR	31.61	3596	4			0.0133369
101_130_BN005.wiff	ltpr1	LQDIVSALEDR	LQDIVSALEDR	31.84	3999	5			0.0148316
101_130_BN006.wiff	ltpr1	LQDIVSALEDR	LQDIVSALEDR	31.5	1829	6			0.00678345
101_130_BN007.wiff	ltpr1	LQDIVSALEDR	LQDIVSALEDR	31.55	2219	7			0.00822989
101_130_BN008.wiff	ltpr1	LQDIVSALEDR	LQDIVSALEDR	31.39	1099	8			0.004076
101_130_BN009.wiff	ltpr1	LQDIVSALEDR	LQDIVSALEDR	31.35	564	9			0.00209178
101_130_BN010.wiff	ltpr1	LQDIVSALEDR	LQDIVSALEDR	31.71	1838	10			0.00681682
101_130_BN011.wiff	ltpr1	LQDIVSALEDR	LQDIVSALEDR	31.54	1917	11			0.00710982
101_130_BN012.wiff	ltpr1	LQDIVSALEDR	LQDIVSALEDR	31.75	1627	12			0.00603426
101_130_BN013.wiff	ltpr1	LQDIVSALEDR	LQDIVSALEDR	31.74	1055	13			0.00391281
101_130_BN014.wiff	ltpr1	LQDIVSALEDR	LQDIVSALEDR	31.73	829	14			0.00307462
101_130_BN015.wiff	ltpr1	LQDIVSALEDR	LQDIVSALEDR	31.59	1833	15			0.00679828
101_130_BN016.wiff	ltpr1	LQDIVSALEDR	LQDIVSALEDR	31.85	319	16			0.00118312
101_130_BN017.wiff	ltpr1	LQDIVSALEDR	LQDIVSALEDR	31.48	2111	17			0.00782933
101_130_BN018.wiff	ltpr1	LQDIVSALEDR	LQDIVSALEDR	31.79	1559	18			0.00578206
101_130_BN019.wiff	ltpr1	LQDIVSALEDR	LQDIVSALEDR	31.8	1456	19			0.00540005
101_130_BN020.wiff	ltpr1	LQDIVSALEDR	LQDIVSALEDR	31.63	3510	20			0.013018
101_130_BN021.wiff	ltpr1	LQDIVSALEDR	LQDIVSALEDR	31.59	4474	21			0.0165933
101_130_BN022.wiff	ltpr1	LQDIVSALEDR	LQDIVSALEDR	31.43	2517	22			0.00933512
101_130_BN023.wiff	ltpr1	LQDIVSALEDR	LQDIVSALEDR	31.69	3056	23			0.0113342
101_130_BN024.wiff	ltpr1	LQDIVSALEDR	LQDIVSALEDR	31.91	1091	24			0.00404633
101_130_BN025.wiff	ltpr1	LQDIVSALEDR	LQDIVSALEDR	31.89	2986	25			0.0110746
101_130_BN026.wiff	ltpr1	LQDIVSALEDR	LQDIVSALEDR	34.49	23483	26			0.0870944
101_130_BN027.wiff	ltpr1	LQDIVSALEDR	LQDIVSALEDR	33.46	51146	27			0.189692
101_130_BN028.wiff	ltpr1	LQDIVSALEDR	LQDIVSALEDR	31.82	76253	28			0.282809
101_130_BN029.wiff	ltpr1	LQDIVSALEDR	LQDIVSALEDR	31.65	36934	29			0.136982
101_130_BN030.wiff	ltpr1	LQDIVSALEDR	LQDIVSALEDR	31.32	24572	30			0.0911333
101_130_BN001.wiff	mGluR1	SNTFLNIFR	SNTFLNIFR	38.02	1267	1		546699	0.00231755
101_130_BN002.wiff	mGluR1	SNTFLNIFR	SNTFLNIFR	37.92	5028	2			0.00919702
101_130_BN003.wiff	mGluR1	SNTFLNIFR	SNTFLNIFR	36.95	3963	3			0.00724896
101_130_BN004.wiff	mGluR1	SNTFLNIFR	SNTFLNIFR	36.89	6567	4			0.0120121
101_130_BN005.wiff	mGluR1	SNTFLNIFR	SNTFLNIFR	36.68	5095	5			0.00931957
101_130_BN006.wiff	mGluR1	SNTFLNIFR	SNTFLNIFR	36.76	1599	6			0.00292483
101_130_BN007.wiff	mGluR1	SNTFLNIFR	SNTFLNIFR	37.07	3371	7			0.0061661
101_130_BN008.wiff	mGluR1	SNTFLNIFR	SNTFLNIFR	37.01	5787	8			0.0105853
101_130_BN009.wiff	mGluR1	SNTFLNIFR	SNTFLNIFR	36.2	4745	9			0.00867936
101_130_BN010.wiff	mGluR1	SNTFLNIFR	SNTFLNIFR	37.55	3674	10			0.00672033
101_130_BN011.wiff	mGluR1	SNTFLNIFR	SNTFLNIFR	36.26	8152	11			0.0149113
101_130_BN012.wiff	mGluR1	SNTFLNIFR	SNTFLNIFR	36.65	7814	12			0.0142931
101_130_BN013.wiff	mGluR1	SNTFLNIFR	SNTFLNIFR	36.19	5830	13			0.010664
101_130_BN014.wiff	mGluR1	SNTFLNIFR	SNTFLNIFR	36.18	5788	14			0.0105872
101_130_BN015.wiff	mGluR1	SNTFLNIFR	SNTFLNIFR	36.72	5417	15			0.00990856
101_130_BN016.wiff	mGluR1	SNTFLNIFR	SNTFLNIFR	36.96	5820	16			0.0106457
101_130_BN017.wiff	mGluR1	SNTFLNIFR	SNTFLNIFR	36.88	4562	17			0.00834463
101_130_BN018.wiff	mGluR1	SNTFLNIFR	SNTFLNIFR	36.89	5897	18			0.0107866
101_130_BN019.wiff	mGluR1	SNTFLNIFR	SNTFLNIFR	37.08	14371	19			0.0262869
101_130_BN020.wiff	mGluR1	SNTFLNIFR	SNTFLNIFR	36.83	24603	20			0.0450028
101_130_BN021.wiff	mGluR1	SNTFLNIFR	SNTFLNIFR	36.66	48640	21			0.0889703
101_130_BN022.wiff	mGluR1	SNTFLNIFR	SNTFLNIFR	36.87	39201	22			0.0717049
101_130_BN023.wiff	mGluR1	SNTFLNIFR	SNTFLNIFR	36.94	25307	23			0.0462906
101_130_BN024.wiff	mGluR1	SNTFLNIFR	SNTFLNIFR	37.56	73393	24			0.134248
101_130_BN025.wiff	mGluR1	SNTFLNIFR	SNTFLNIFR	38.23	40082	25			0.0733164
101_130_BN026.wiff	mGluR1	SNTFLNIFR	SNTFLNIFR	41.99	33609	26			0.0614762
101_130_BN027.wiff	mGluR1	SNTFLNIFR	SNTFLNIFR	41.48	29120	27			0.0532651
101_130_BN028.wiff	mGluR1	SNTFLNIFR	SNTFLNIFR	37.17	78864	28			0.144255
101_130_BN029.wiff	mGluR1	SNTFLNIFR	SNTFLNIFR	36.86	25546	29			0.0467277
101_130_BN030.wiff	mGluR1	SNTFLNIFR	SNTFLNIFR	36.28	23587	30			0.0431444
101_130_BN001.wiff	mGluR1	SVSWSEPGGR	SVSWSEPGGR	18.28	188	1		121050	0.00155308
101_130_BN002.wiff	mGluR1	SVSWSEPGGR	SVSWSEPGGR	18.55	67	2			0.00055349
101_130_BN003.wiff	mGluR1	SVSWSEPGGR	SVSWSEPGGR	18.69	47	3			0.000388269
101_130_BN004.wiff	mGluR1	SVSWSEPGGR	SVSWSEPGGR	18.72	174	4			0.00143742
101_130_BN005.wiff	mGluR1	SVSWSEPGGR	SVSWSEPGGR	18.28	136	5			0.0011235
101_130_BN006.wiff	mGluR1	SVSWSEPGGR	SVSWSEPGGR	18.2	74	6			0.000611318
101_130_BN007.wiff	mGluR1	SVSWSEPGGR	SVSWSEPGGR	18.31	483	7			0.00399009
101_130_BN008.wiff	mGluR1	SVSWSEPGGR	SVSWSEPGGR	18.23	180	8			0.00148699
101_130_BN009.wiff	mGluR1	SVSWSEPGGR	SVSWSEPGGR	18.35	368	9			0.00304007
101_130_BN010.wiff	mGluR1	SVSWSEPGGR	SVSWSEPGGR	18.31	931	10			0.00769104
101_130_BN011.wiff	mGluR1	SVSWSEPGGR	SVSWSEPGGR	18.43	343	11			0.00283354
101_130_BN012.wiff	mGluR1	SVSWSEPGGR	SVSWSEPGGR	18.36	457	12			0.0037753
101_130_BN013.wiff	mGluR1	SVSWSEPGGR	SVSWSEPGGR	18.53	289	13			0.00238744
101_130_BN014.wiff	mGluR1	SVSWSEPGGR	SVSWSEPGGR	18.47	682	14			0.00563404
101_130_BN015.wiff	mGluR1	SVSWSEPGGR	SVSWSEPGGR	18.33	97	15			0.000801322
101_130_BN016.wiff	mGluR1	SVSWSEPGGR	SVSWSEPGGR	18.52	100	16			0.000826105
101_130_BN017.wiff	mGluR1	SVSWSEPGGR	SVSWSEPGGR	18.59	793	17			0.00655101
101_130_BN018.wiff	mGluR1	SVSWSEPGGR	SVSWSEPGGR	18.64	1250	18			0.0103263
101_130_BN019.wiff	mGluR1	SVSWSEPGGR	SVSWSEPGGR	18.72	3002	19			0.0247997
101_130_BN020.wiff	mGluR1	SVSWSEPGGR	SVSWSEPGGR	18.62	5630	20			0.0465097
101_130_BN021.wiff	mGluR1	SVSWSEPGGR	SVSWSEPGGR	18.58	15374	21			0.127005
101_130_BN022.wiff	mGluR1	SVSWSEPGGR	SVSWSEPGGR	18.63	9954	22			0.0822305
101_130_BN023.wiff	mGluR1	SVSWSEPGGR	SVSWSEPGGR	18.62	7409	23			0.0612061
101_130_BN024.wiff	mGluR1	SVSWSEPGGR	SVSWSEPGGR	18.64	9405	24			0.0776952
101_130_BN025.wiff	mGluR1	SVSWSEPGGR	SVSWSEPGGR	18.73	9328	25			0.0770591
101_130_BN026.wiff	mGluR1	SVSWSEPGGR	SVSWSEPGGR	19.08	8134	26			0.0671954
101_130_BN027.wiff	mGluR1	SVSWSEPGGR	SVSWSEPGGR	19.01	13580	27			0.112185
101_130_BN028.wiff	mGluR1	SVSWSEPGGR	SVSWSEPGGR	18.65	18559	28			0.153317
101_130_BN029.wiff	mGluR1	SVSWSEPGGR	SVSWSEPGGR	18.55	7091	29			0.0585791
101_130_BN030.wiff	mGluR1	SVSWSEPGGR	SVSWSEPGGR	18.27	6925	30			0.0572078
101_130_BN001.wiff	Nptx1	SNVLQLR	SNVLQLR	22.46	187	1		750261	0.000249247
101_130_BN002.wiff	Nptx1	SNVLQLR	SNVLQLR	22.84	401	2			0.000534481
101_130_BN003.wiff	Nptx1	SNVLQLR	SNVLQLR	22.35	372	3			0.000495827
101_130_BN004.wiff	Nptx1	SNVLQLR	SNVLQLR	22.06	1931	4			0.00257377
101_130_BN005.wiff	Nptx1	SNVLQLR	SNVLQLR	22.2	561	5			0.00074774
101_130_BN006.wiff	Nptx1	SNVLQLR	SNVLQLR	23.05	3012	6			0.0040146
101_130_BN007.wiff	Nptx1	SNVLQLR	SNVLQLR	21.69	2139	7			0.00285101
101_130_BN008.wiff	Nptx1	SNVLQLR	SNVLQLR	22.18	851	8			0.00113427
101_130_BN009.wiff	Nptx1	SNVLQLR	SNVLQLR	21.81	1358	9			0.00181004
101_130_BN010.wiff	Nptx1	SNVLQLR	SNVLQLR	22.19	450	10			0.000599791
101_130_BN011.wiff	Nptx1	SNVLQLR	SNVLQLR	21.9	12230	11			0.016301
101_130_BN012.wiff	Nptx1	SNVLQLR	SNVLQLR	21.89	22501	12			0.0299909
101_130_BN013.wiff	Nptx1	SNVLQLR	SNVLQLR	21.94	25759	13			0.0343334
101_130_BN014.wiff	Nptx1	SNVLQLR	SNVLQLR	21.86	42287	14			0.0563631
101_130_BN015.wiff	Nptx1	SNVLQLR	SNVLQLR	21.94	53948	15			0.0719056
101_130_BN016.wiff	Nptx1	SNVLQLR	SNVLQLR	21.99	83123	16			0.110792
101_130_BN017.wiff	Nptx1	SNVLQLR	SNVLQLR	22.16	157792	17			0.210316
101_130_BN018.wiff	Nptx1	SNVLQLR	SNVLQLR	22.12	129653	18			0.172811
101_130_BN019.wiff	Nptx1	SNVLQLR	SNVLQLR	22.23	63373	19			0.0844679
101_130_BN020.wiff	Nptx1	SNVLQLR	SNVLQLR	22.13	63136	20			0.084152
101_130_BN021.wiff	Nptx1	SNVLQLR	SNVLQLR	22.03	34990	21			0.0466371
101_130_BN022.wiff	Nptx1	SNVLQLR	SNVLQLR	22.17	17696	22			0.0235865
101_130_BN023.wiff	Nptx1	SNVLQLR	SNVLQLR	22.07	12074	23			0.0160931
101_130_BN024.wiff	Nptx1	SNVLQLR	SNVLQLR	22.1	6726	24			0.00896488
101_130_BN025.wiff	Nptx1	SNVLQLR	SNVLQLR	22.8	1601	25			0.00213392
101_130_BN026.wiff	Nptx1	SNVLQLR	SNVLQLR	22.86	1222	26			0.00162877
101_130_BN027.wiff	Nptx1	SNVLQLR	SNVLQLR	23.33	2188	27			0.00291632
101_130_BN028.wiff	Nptx1	SNVLQLR	SNVLQLR	23.07	2983	28			0.00397595
101_130_BN029.wiff	Nptx1	SNVLQLR	SNVLQLR	22.94	2901	29			0.00386665
101_130_BN030.wiff	Nptx1	SNVLQLR	SNVLQLR	22.52	2816	30			0.00375336
101_130_BN001.wiff	Nptx1	TPAAETLSQLGQTLQSLK	TPAAETLSQLGQTLQSLK	40.2	1226	1		5065343	0.000242037
101_130_BN002.wiff	Nptx1	TPAAETLSQLGQTLQSLK	TPAAETLSQLGQTLQSLK	39.28	17759	2			0.00350598
101_130_BN003.wiff	Nptx1	TPAAETLSQLGQTLQSLK	TPAAETLSQLGQTLQSLK	38.72	3645	3			0.000719596
101_130_BN004.wiff	Nptx1	TPAAETLSQLGQTLQSLK	TPAAETLSQLGQTLQSLK	38.64	7083	4			0.00139833
101_130_BN005.wiff	Nptx1	TPAAETLSQLGQTLQSLK	TPAAETLSQLGQTLQSLK	38.92	21897	5			0.00432291
101_130_BN006.wiff	Nptx1	TPAAETLSQLGQTLQSLK	TPAAETLSQLGQTLQSLK	37.75	21053	6			0.00415628
101_130_BN007.wiff	Nptx1	TPAAETLSQLGQTLQSLK	TPAAETLSQLGQTLQSLK	38.14	26130	7			0.00515858
101_130_BN008.wiff	Nptx1	TPAAETLSQLGQTLQSLK	TPAAETLSQLGQTLQSLK	38.26	40958	8			0.00808593
101_130_BN009.wiff	Nptx1	TPAAETLSQLGQTLQSLK	TPAAETLSQLGQTLQSLK	38.19	29616	9			0.00584679
101_130_BN010.wiff	Nptx1	TPAAETLSQLGQTLQSLK	TPAAETLSQLGQTLQSLK	38.27	30757	10			0.00607205
101_130_BN011.wiff	Nptx1	TPAAETLSQLGQTLQSLK	TPAAETLSQLGQTLQSLK	38.2	27593	11			0.00544741
101_130_BN012.wiff	Nptx1	TPAAETLSQLGQTLQSLK	TPAAETLSQLGQTLQSLK	38.69	12032	12			0.00237536
101_130_BN013.wiff	Nptx1	TPAAETLSQLGQTLQSLK	TPAAETLSQLGQTLQSLK	38.67	36768	13			0.00725874
101_130_BN014.wiff	Nptx1	TPAAETLSQLGQTLQSLK	TPAAETLSQLGQTLQSLK	38.56	129267	14			0.0255199
101_130_BN015.wiff	Nptx1	TPAAETLSQLGQTLQSLK	TPAAETLSQLGQTLQSLK	38.78	249486	15			0.0492535
101_130_BN016.wiff	Nptx1	TPAAETLSQLGQTLQSLK	TPAAETLSQLGQTLQSLK	38.82	418640	16			0.0826479
101_130_BN017.wiff	Nptx1	TPAAETLSQLGQTLQSLK	TPAAETLSQLGQTLQSLK	38.96	1067158	17			0.210678
101_130_BN018.wiff	Nptx1	TPAAETLSQLGQTLQSLK	TPAAETLSQLGQTLQSLK	39.01	1033107	18			0.203956
101_130_BN019.wiff	Nptx1	TPAAETLSQLGQTLQSLK	TPAAETLSQLGQTLQSLK	39.17	431374	19			0.0851619
101_130_BN020.wiff	Nptx1	TPAAETLSQLGQTLQSLK	TPAAETLSQLGQTLQSLK	38.93	503388	20			0.0993789
101_130_BN021.wiff	Nptx1	TPAAETLSQLGQTLQSLK	TPAAETLSQLGQTLQSLK	38.96	456461	21			0.0901145
101_130_BN022.wiff	Nptx1	TPAAETLSQLGQTLQSLK	TPAAETLSQLGQTLQSLK	38.97	138641	22			0.0273705
101_130_BN023.wiff	Nptx1	TPAAETLSQLGQTLQSLK	TPAAETLSQLGQTLQSLK	39.07	75307	23			0.0148671
101_130_BN024.wiff	Nptx1	TPAAETLSQLGQTLQSLK	TPAAETLSQLGQTLQSLK	39.8	127602	24			0.0251912
101_130_BN025.wiff	Nptx1	TPAAETLSQLGQTLQSLK	TPAAETLSQLGQTLQSLK	40.14	57991	25			0.0114486
101_130_BN026.wiff	Nptx1	TPAAETLSQLGQTLQSLK	TPAAETLSQLGQTLQSLK	41.63	32095	26			0.00633619
101_130_BN027.wiff	Nptx1	TPAAETLSQLGQTLQSLK	TPAAETLSQLGQTLQSLK	41.35	11210	27			0.00221308
101_130_BN028.wiff	Nptx1	TPAAETLSQLGQTLQSLK	TPAAETLSQLGQTLQSLK	39.25	17332	28			0.00342168
101_130_BN029.wiff	Nptx1	TPAAETLSQLGQTLQSLK	TPAAETLSQLGQTLQSLK	38.89	9871	29			0.00194873
101_130_BN030.wiff	Nptx1	TPAAETLSQLGQTLQSLK	TPAAETLSQLGQTLQSLK	38.42	29896	30			0.00590207
101_130_BN001.wiff	Nptxr	MDELEGQLLAK	M[+16]DELEGQLLAK	25.33	7247	1		440876	0.0164377
101_130_BN002.wiff	Nptxr	MDELEGQLLAK	M[+16]DELEGQLLAK	25.59	16919	2			0.0383759
101_130_BN003.wiff	Nptxr	MDELEGQLLAK	M[+16]DELEGQLLAK	25.62	19206	3			0.0435633
101_130_BN004.wiff	Nptxr	MDELEGQLLAK	M[+16]DELEGQLLAK	25.44	27496	4			0.0623667
101_130_BN005.wiff	Nptxr	MDELEGQLLAK	M[+16]DELEGQLLAK	25.46	47675	5			0.108137
101_130_BN006.wiff	Nptxr	MDELEGQLLAK	M[+16]DELEGQLLAK	25.41	31449	6			0.071333
101_130_BN007.wiff	Nptxr	MDELEGQLLAK	M[+16]DELEGQLLAK	25.34	34097	7			0.0773392
101_130_BN008.wiff	Nptxr	MDELEGQLLAK	M[+16]DELEGQLLAK	25.29	36500	8			0.0827897
101_130_BN009.wiff	Nptxr	MDELEGQLLAK	M[+16]DELEGQLLAK	25.2	13502	9			0.0306254
101_130_BN010.wiff	Nptxr	MDELEGQLLAK	M[+16]DELEGQLLAK	25.26	33759	10			0.0765726
101_130_BN011.wiff	Nptxr	MDELEGQLLAK	M[+16]DELEGQLLAK	25.3	13545	11			0.0307229
101_130_BN012.wiff	Nptxr	MDELEGQLLAK	M[+16]DELEGQLLAK	25.07	704	12			0.00159682
101_130_BN013.wiff	Nptxr	MDELEGQLLAK	M[+16]DELEGQLLAK	25.3	3738	13			0.00847857
101_130_BN014.wiff	Nptxr	MDELEGQLLAK	M[+16]DELEGQLLAK	25.22	2545	14			0.0057726
101_130_BN015.wiff	Nptxr	MDELEGQLLAK	M[+16]DELEGQLLAK	25.27	2649	15			0.00600849
101_130_BN016.wiff	Nptxr	MDELEGQLLAK	M[+16]DELEGQLLAK	25.15	3657	16			0.00829485
101_130_BN017.wiff	Nptxr	MDELEGQLLAK	M[+16]DELEGQLLAK	25.34	7893	17			0.017903
101_130_BN018.wiff	Nptxr	MDELEGQLLAK	M[+16]DELEGQLLAK	25.16	17692	18			0.0401292
101_130_BN019.wiff	Nptxr	MDELEGQLLAK	M[+16]DELEGQLLAK	25.21	11930	19			0.0270598
101_130_BN020.wiff	Nptxr	MDELEGQLLAK	M[+16]DELEGQLLAK	25.31	17905	20			0.0406123
101_130_BN021.wiff	Nptxr	MDELEGQLLAK	M[+16]DELEGQLLAK	25.24	24095	21			0.0546526
101_130_BN022.wiff	Nptxr	MDELEGQLLAK	M[+16]DELEGQLLAK	25.32	13488	22			0.0305936
101_130_BN023.wiff	Nptxr	MDELEGQLLAK	M[+16]DELEGQLLAK	25.3	9104	23			0.0206498
101_130_BN024.wiff	Nptxr	MDELEGQLLAK	M[+16]DELEGQLLAK	25.35	8567	24			0.0194318
101_130_BN025.wiff	Nptxr	MDELEGQLLAK	M[+16]DELEGQLLAK	25.41	6431	25			0.0145869
101_130_BN026.wiff	Nptxr	MDELEGQLLAK	M[+16]DELEGQLLAK	26.24	3231	26			0.00732859
101_130_BN027.wiff	Nptxr	MDELEGQLLAK	M[+16]DELEGQLLAK	26.1	2337	27			0.00530081
101_130_BN028.wiff	Nptxr	MDELEGQLLAK	M[+16]DELEGQLLAK	25.4	13067	28			0.0296387
101_130_BN029.wiff	Nptxr	MDELEGQLLAK	M[+16]DELEGQLLAK	25.28	5476	29			0.0124207
101_130_BN030.wiff	Nptxr	MDELEGQLLAK	M[+16]DELEGQLLAK	25.02	4972	30			0.0112775
101_130_BN001.wiff	Nptxr	AELLLLQSTAEQLR	AELLLLQSTAEQLR	36.4	1394	1		2080896	0.000669904
101_130_BN002.wiff	Nptxr	AELLLLQSTAEQLR	AELLLLQSTAEQLR	36.78	3382	2			0.00162526
101_130_BN003.wiff	Nptxr	AELLLLQSTAEQLR	AELLLLQSTAEQLR	35.71	1379	3			0.000662695
101_130_BN004.wiff	Nptxr	AELLLLQSTAEQLR	AELLLLQSTAEQLR	35.51	1586	4			0.000762172
101_130_BN005.wiff	Nptxr	AELLLLQSTAEQLR	AELLLLQSTAEQLR	35.57	1963	5			0.000943344
101_130_BN006.wiff	Nptxr	AELLLLQSTAEQLR	AELLLLQSTAEQLR	35.4	2941	6			0.00141333
101_130_BN007.wiff	Nptxr	AELLLLQSTAEQLR	AELLLLQSTAEQLR	35.25	4039	7			0.00194099
101_130_BN008.wiff	Nptxr	AELLLLQSTAEQLR	AELLLLQSTAEQLR	35.35	2238	8			0.0010755
101_130_BN009.wiff	Nptxr	AELLLLQSTAEQLR	AELLLLQSTAEQLR	35.29	4676	9			0.00224711
101_130_BN010.wiff	Nptxr	AELLLLQSTAEQLR	AELLLLQSTAEQLR	35.39	11929	10			0.00573263
101_130_BN011.wiff	Nptxr	AELLLLQSTAEQLR	AELLLLQSTAEQLR	35.32	24130	11			0.011596
101_130_BN012.wiff	Nptxr	AELLLLQSTAEQLR	AELLLLQSTAEQLR	35.36	29491	12			0.0141723
101_130_BN013.wiff	Nptxr	AELLLLQSTAEQLR	AELLLLQSTAEQLR	35.3	70074	13			0.0336749
101_130_BN014.wiff	Nptxr	AELLLLQSTAEQLR	AELLLLQSTAEQLR	35.2	132629	14			0.0637365
101_130_BN015.wiff	Nptxr	AELLLLQSTAEQLR	AELLLLQSTAEQLR	35.44	174098	15			0.0836649
101_130_BN016.wiff	Nptxr	AELLLLQSTAEQLR	AELLLLQSTAEQLR	35.4	265584	16			0.12763
101_130_BN017.wiff	Nptxr	AELLLLQSTAEQLR	AELLLLQSTAEQLR	35.6	349212	17			0.167818
101_130_BN018.wiff	Nptxr	AELLLLQSTAEQLR	AELLLLQSTAEQLR	35.61	362789	18			0.174343
101_130_BN019.wiff	Nptxr	AELLLLQSTAEQLR	AELLLLQSTAEQLR	35.78	190789	19			0.091686
101_130_BN020.wiff	Nptxr	AELLLLQSTAEQLR	AELLLLQSTAEQLR	35.53	148125	20			0.0711833
101_130_BN021.wiff	Nptxr	AELLLLQSTAEQLR	AELLLLQSTAEQLR	35.45	115362	21			0.0554386
101_130_BN022.wiff	Nptxr	AELLLLQSTAEQLR	AELLLLQSTAEQLR	35.59	43523	22			0.0209155
101_130_BN023.wiff	Nptxr	AELLLLQSTAEQLR	AELLLLQSTAEQLR	35.61	32692	23			0.0157105
101_130_BN024.wiff	Nptxr	AELLLLQSTAEQLR	AELLLLQSTAEQLR	36.01	31883	24			0.0153218
101_130_BN025.wiff	Nptxr	AELLLLQSTAEQLR	AELLLLQSTAEQLR	36.44	43314	25			0.0208151
101_130_BN026.wiff	Nptxr	AELLLLQSTAEQLR	AELLLLQSTAEQLR	38.9	4019	26			0.00193138
101_130_BN027.wiff	Nptxr	AELLLLQSTAEQLR	AELLLLQSTAEQLR	38.58	7384	27			0.00354847
101_130_BN028.wiff	Nptxr	AELLLLQSTAEQLR	AELLLLQSTAEQLR	35.81	6582	28			0.00316306
101_130_BN029.wiff	Nptxr	AELLLLQSTAEQLR	AELLLLQSTAEQLR	34.96	5092	29			0.00244702
101_130_BN030.wiff	Nptxr	AELLLLQSTAEQLR	AELLLLQSTAEQLR	35.13	8597	30			0.00413139
101_130_BN001.wiff	Nsf	AENSSLNLIGK	AENSSLNLIGK	23.74	1011	1		71408	0.0141581
101_130_BN002.wiff	Nsf	AENSSLNLIGK	AENSSLNLIGK	23.18	311	2			0.00435525
101_130_BN003.wiff	Nsf	AENSSLNLIGK	AENSSLNLIGK	23.12	419	3			0.00586769
101_130_BN004.wiff	Nsf	AENSSLNLIGK	AENSSLNLIGK	23.06	745	4			0.010433
101_130_BN005.wiff	Nsf	AENSSLNLIGK	AENSSLNLIGK	22.72	605	5			0.00847244
101_130_BN006.wiff	Nsf	AENSSLNLIGK	AENSSLNLIGK	22.84	184	6			0.00257674
101_130_BN007.wiff	Nsf	AENSSLNLIGK	AENSSLNLIGK	22.61	1038	7			0.0145362
101_130_BN008.wiff	Nsf	AENSSLNLIGK	AENSSLNLIGK	22.65	1417	8			0.0198437
101_130_BN009.wiff	Nsf	AENSSLNLIGK	AENSSLNLIGK	22.92	1041	9			0.0145782
101_130_BN010.wiff	Nsf	AENSSLNLIGK	AENSSLNLIGK	22.95	1433	10			0.0200678
101_130_BN011.wiff	Nsf	AENSSLNLIGK	AENSSLNLIGK	22.92	1225	11			0.0171549
101_130_BN012.wiff	Nsf	AENSSLNLIGK	AENSSLNLIGK	22.84	817	12			0.0114413
101_130_BN013.wiff	Nsf	AENSSLNLIGK	AENSSLNLIGK	22.72	288	13			0.00403316
101_130_BN014.wiff	Nsf	AENSSLNLIGK	AENSSLNLIGK	22.92	385	14			0.00539155
101_130_BN015.wiff	Nsf	AENSSLNLIGK	AENSSLNLIGK	22.96	197	15			0.00275879
101_130_BN016.wiff	Nsf	AENSSLNLIGK	AENSSLNLIGK	23.08	355	16			0.00497143
101_130_BN017.wiff	Nsf	AENSSLNLIGK	AENSSLNLIGK	23.17	353	17			0.00494342
101_130_BN018.wiff	Nsf	AENSSLNLIGK	AENSSLNLIGK	23.24	1031	18			0.0144382
101_130_BN019.wiff	Nsf	AENSSLNLIGK	AENSSLNLIGK	23.09	1003	19			0.014046
101_130_BN020.wiff	Nsf	AENSSLNLIGK	AENSSLNLIGK	23.15	379	20			0.00530753
101_130_BN021.wiff	Nsf	AENSSLNLIGK	AENSSLNLIGK	22.93	554	21			0.00775823
101_130_BN022.wiff	Nsf	AENSSLNLIGK	AENSSLNLIGK	22.95	629	22			0.00880854
101_130_BN023.wiff	Nsf	AENSSLNLIGK	AENSSLNLIGK	23.17	339	23			0.00474737
101_130_BN024.wiff	Nsf	AENSSLNLIGK	AENSSLNLIGK	22.87	919	24			0.0128697
101_130_BN025.wiff	Nsf	AENSSLNLIGK	AENSSLNLIGK	23.33	842	25			0.0117914
101_130_BN026.wiff	Nsf	AENSSLNLIGK	AENSSLNLIGK	23.05	659	26			0.00922866
101_130_BN027.wiff	Nsf	AENSSLNLIGK	AENSSLNLIGK	23.36	442	27			0.00618978
101_130_BN028.wiff	Nsf	AENSSLNLIGK	AENSSLNLIGK	23.39	20563	28			0.287965
101_130_BN029.wiff	Nsf	AENSSLNLIGK	AENSSLNLIGK	23.39	17299	29			0.242256
101_130_BN030.wiff	Nsf	AENSSLNLIGK	AENSSLNLIGK	22.99	14925	30			0.20901
101_130_BN001.wiff	Nsf	VLDDGELLVQQTK	VLDDGELLVQQTK	26.2	3494	1		226019	0.0154589
101_130_BN002.wiff	Nsf	VLDDGELLVQQTK	VLDDGELLVQQTK	26.34	4174	2			0.0184675
101_130_BN003.wiff	Nsf	VLDDGELLVQQTK	VLDDGELLVQQTK	26.38	4310	3			0.0190692
101_130_BN004.wiff	Nsf	VLDDGELLVQQTK	VLDDGELLVQQTK	26.23	8723	4			0.0385941
101_130_BN005.wiff	Nsf	VLDDGELLVQQTK	VLDDGELLVQQTK	26.25	4521	5			0.0200027
101_130_BN006.wiff	Nsf	VLDDGELLVQQTK	VLDDGELLVQQTK	26.27	3007	6			0.0133042
101_130_BN007.wiff	Nsf	VLDDGELLVQQTK	VLDDGELLVQQTK	26.12	5185	7			0.0229405
101_130_BN008.wiff	Nsf	VLDDGELLVQQTK	VLDDGELLVQQTK	26.1	7011	8			0.0310195
101_130_BN009.wiff	Nsf	VLDDGELLVQQTK	VLDDGELLVQQTK	26.13	3739	9			0.0165429
101_130_BN010.wiff	Nsf	VLDDGELLVQQTK	VLDDGELLVQQTK	26.14	5960	10			0.0263695
101_130_BN011.wiff	Nsf	VLDDGELLVQQTK	VLDDGELLVQQTK	26.3	3929	11			0.0173835
101_130_BN012.wiff	Nsf	VLDDGELLVQQTK	VLDDGELLVQQTK	26.11	2995	12			0.0132511
101_130_BN013.wiff	Nsf	VLDDGELLVQQTK	VLDDGELLVQQTK	26.15	6347	13			0.0280817
101_130_BN014.wiff	Nsf	VLDDGELLVQQTK	VLDDGELLVQQTK	26.28	4025	14			0.0178082
101_130_BN015.wiff	Nsf	VLDDGELLVQQTK	VLDDGELLVQQTK	26.14	5121	15			0.0226574
101_130_BN016.wiff	Nsf	VLDDGELLVQQTK	VLDDGELLVQQTK	26.17	2413	16			0.0106761
101_130_BN017.wiff	Nsf	VLDDGELLVQQTK	VLDDGELLVQQTK	26.53	5491	17			0.0242944
101_130_BN018.wiff	Nsf	VLDDGELLVQQTK	VLDDGELLVQQTK	26.51	6615	18			0.0292675
101_130_BN019.wiff	Nsf	VLDDGELLVQQTK	VLDDGELLVQQTK	26.6	5757	19			0.0254713
101_130_BN020.wiff	Nsf	VLDDGELLVQQTK	VLDDGELLVQQTK	26.49	4059	20			0.0179587
101_130_BN021.wiff	Nsf	VLDDGELLVQQTK	VLDDGELLVQQTK	26.47	5214	21			0.0230689
101_130_BN022.wiff	Nsf	VLDDGELLVQQTK	VLDDGELLVQQTK	26.48	5810	22			0.0257058
101_130_BN023.wiff	Nsf	VLDDGELLVQQTK	VLDDGELLVQQTK	26.51	6657	23			0.0294533
101_130_BN024.wiff	Nsf	VLDDGELLVQQTK	VLDDGELLVQQTK	26.57	9266	24			0.0409966
101_130_BN025.wiff	Nsf	VLDDGELLVQQTK	VLDDGELLVQQTK	26.58	13172	25			0.0582783
101_130_BN026.wiff	Nsf	VLDDGELLVQQTK	VLDDGELLVQQTK	27.39	10589	26			0.04685
101_130_BN027.wiff	Nsf	VLDDGELLVQQTK	VLDDGELLVQQTK	27.44	23577	27			0.104314
101_130_BN028.wiff	Nsf	VLDDGELLVQQTK	VLDDGELLVQQTK	26.59	34851	28			0.154195
101_130_BN029.wiff	Nsf	VLDDGELLVQQTK	VLDDGELLVQQTK	26.45	20007	29			0.0885191
101_130_BN030.wiff	Nsf	VLDDGELLVQQTK	VLDDGELLVQQTK	#N/A	#N/A	30			#VALUE!
101_130_BN001.wiff	Ppp3ca	GLTPTGMLPSGVLSGGK	GLTPTGM[+16]LPSGVLSGGK	27.28	3658	1		51224793	7.14107e-05
101_130_BN002.wiff	Ppp3ca	GLTPTGMLPSGVLSGGK	GLTPTGM[+16]LPSGVLSGGK	28.13	6962	2			0.000135911
101_130_BN003.wiff	Ppp3ca	GLTPTGMLPSGVLSGGK	GLTPTGM[+16]LPSGVLSGGK	28.1	14450	3			0.00028209
101_130_BN004.wiff	Ppp3ca	GLTPTGMLPSGVLSGGK	GLTPTGM[+16]LPSGVLSGGK	27.95	47589	4			0.000929023
101_130_BN005.wiff	Ppp3ca	GLTPTGMLPSGVLSGGK	GLTPTGM[+16]LPSGVLSGGK	28	225045	5			0.00439328
101_130_BN006.wiff	Ppp3ca	GLTPTGMLPSGVLSGGK	GLTPTGM[+16]LPSGVLSGGK	27.94	394366	6			0.00769873
101_130_BN007.wiff	Ppp3ca	GLTPTGMLPSGVLSGGK	GLTPTGM[+16]LPSGVLSGGK	27.85	1693499	7			0.0330601
101_130_BN008.wiff	Ppp3ca	GLTPTGMLPSGVLSGGK	GLTPTGM[+16]LPSGVLSGGK	27.77	8592835	8			0.167748
101_130_BN009.wiff	Ppp3ca	GLTPTGMLPSGVLSGGK	GLTPTGM[+16]LPSGVLSGGK	27.69	10018897	9			0.195587
101_130_BN010.wiff	Ppp3ca	GLTPTGMLPSGVLSGGK	GLTPTGM[+16]LPSGVLSGGK	27.78	6536244	10			0.127599
101_130_BN011.wiff	Ppp3ca	GLTPTGMLPSGVLSGGK	GLTPTGM[+16]LPSGVLSGGK	27.79	1949843	11			0.0380644
101_130_BN012.wiff	Ppp3ca	GLTPTGMLPSGVLSGGK	GLTPTGM[+16]LPSGVLSGGK	27.79	928572	12			0.0181274
101_130_BN013.wiff	Ppp3ca	GLTPTGMLPSGVLSGGK	GLTPTGM[+16]LPSGVLSGGK	27.8	1078648	13			0.0210571
101_130_BN014.wiff	Ppp3ca	GLTPTGMLPSGVLSGGK	GLTPTGM[+16]LPSGVLSGGK	27.74	1030038	14			0.0201082
101_130_BN015.wiff	Ppp3ca	GLTPTGMLPSGVLSGGK	GLTPTGM[+16]LPSGVLSGGK	27.85	842507	15			0.0164473
101_130_BN016.wiff	Ppp3ca	GLTPTGMLPSGVLSGGK	GLTPTGM[+16]LPSGVLSGGK	27.84	816460	16			0.0159388
101_130_BN017.wiff	Ppp3ca	GLTPTGMLPSGVLSGGK	GLTPTGM[+16]LPSGVLSGGK	28.03	865640	17			0.0168988
101_130_BN018.wiff	Ppp3ca	GLTPTGMLPSGVLSGGK	GLTPTGM[+16]LPSGVLSGGK	28.03	933175	18			0.0182173
101_130_BN019.wiff	Ppp3ca	GLTPTGMLPSGVLSGGK	GLTPTGM[+16]LPSGVLSGGK	28.12	581024	19			0.0113426
101_130_BN020.wiff	Ppp3ca	GLTPTGMLPSGVLSGGK	GLTPTGM[+16]LPSGVLSGGK	27.97	1306826	20			0.0255116
101_130_BN021.wiff	Ppp3ca	GLTPTGMLPSGVLSGGK	GLTPTGM[+16]LPSGVLSGGK	27.89	3007229	21			0.0587065
101_130_BN022.wiff	Ppp3ca	GLTPTGMLPSGVLSGGK	GLTPTGM[+16]LPSGVLSGGK	27.94	2593887	22			0.0506373
101_130_BN023.wiff	Ppp3ca	GLTPTGMLPSGVLSGGK	GLTPTGM[+16]LPSGVLSGGK	27.98	1815869	23			0.035449
101_130_BN024.wiff	Ppp3ca	GLTPTGMLPSGVLSGGK	GLTPTGM[+16]LPSGVLSGGK	28.06	1703271	24			0.0332509
101_130_BN025.wiff	Ppp3ca	GLTPTGMLPSGVLSGGK	GLTPTGM[+16]LPSGVLSGGK	28.08	1264602	25			0.0246873
101_130_BN026.wiff	Ppp3ca	GLTPTGMLPSGVLSGGK	GLTPTGM[+16]LPSGVLSGGK	29.3	1204059	26			0.0235054
101_130_BN027.wiff	Ppp3ca	GLTPTGMLPSGVLSGGK	GLTPTGM[+16]LPSGVLSGGK	28.77	777503	27			0.0151783
101_130_BN028.wiff	Ppp3ca	GLTPTGMLPSGVLSGGK	GLTPTGM[+16]LPSGVLSGGK	28.09	604133	28			0.0117938
101_130_BN029.wiff	Ppp3ca	GLTPTGMLPSGVLSGGK	GLTPTGM[+16]LPSGVLSGGK	27.96	182975	29			0.003572
101_130_BN030.wiff	Ppp3ca	GLTPTGMLPSGVLSGGK	GLTPTGM[+16]LPSGVLSGGK	27.69	204987	30			0.00400171
101_130_BN001.wiff	Ppp3ca	IITEGASILR	IITEGASILR	25.52	44045	1		53906609	0.000817061
101_130_BN002.wiff	Ppp3ca	IITEGASILR	IITEGASILR	25.83	55452	2			0.00102867
101_130_BN003.wiff	Ppp3ca	IITEGASILR	IITEGASILR	25.84	90748	3			0.00168343
101_130_BN004.wiff	Ppp3ca	IITEGASILR	IITEGASILR	25.64	169456	4			0.00314351
101_130_BN005.wiff	Ppp3ca	IITEGASILR	IITEGASILR	25.68	333450	5			0.0061857
101_130_BN006.wiff	Ppp3ca	IITEGASILR	IITEGASILR	25.59	455457	6			0.008449
101_130_BN007.wiff	Ppp3ca	IITEGASILR	IITEGASILR	25.53	1734888	7			0.0321832
101_130_BN008.wiff	Ppp3ca	IITEGASILR	IITEGASILR	25.36	9519552	8			0.176593
101_130_BN009.wiff	Ppp3ca	IITEGASILR	IITEGASILR	25.26	10088266	9			0.187143
101_130_BN010.wiff	Ppp3ca	IITEGASILR	IITEGASILR	25.37	7775632	10			0.144243
101_130_BN011.wiff	Ppp3ca	IITEGASILR	IITEGASILR	25.43	2516257	11			0.0466781
101_130_BN012.wiff	Ppp3ca	IITEGASILR	IITEGASILR	25.44	857859	12			0.0159138
101_130_BN013.wiff	Ppp3ca	IITEGASILR	IITEGASILR	25.48	1036700	13			0.0192314
101_130_BN014.wiff	Ppp3ca	IITEGASILR	IITEGASILR	25.38	969401	14			0.017983
101_130_BN015.wiff	Ppp3ca	IITEGASILR	IITEGASILR	25.49	674399	15			0.0125105
101_130_BN016.wiff	Ppp3ca	IITEGASILR	IITEGASILR	25.51	852805	16			0.01582
101_130_BN017.wiff	Ppp3ca	IITEGASILR	IITEGASILR	25.72	860161	17			0.0159565
101_130_BN018.wiff	Ppp3ca	IITEGASILR	IITEGASILR	25.7	857221	18			0.015902
101_130_BN019.wiff	Ppp3ca	IITEGASILR	IITEGASILR	25.78	570323	19			0.0105798
101_130_BN020.wiff	Ppp3ca	IITEGASILR	IITEGASILR	25.66	1395497	20			0.0258873
101_130_BN021.wiff	Ppp3ca	IITEGASILR	IITEGASILR	25.56	2995381	21			0.0555661
101_130_BN022.wiff	Ppp3ca	IITEGASILR	IITEGASILR	25.64	2520653	22			0.0467596
101_130_BN023.wiff	Ppp3ca	IITEGASILR	IITEGASILR	25.64	1886037	23			0.0349871
101_130_BN024.wiff	Ppp3ca	IITEGASILR	IITEGASILR	25.73	1636886	24			0.0303652
101_130_BN025.wiff	Ppp3ca	IITEGASILR	IITEGASILR	25.77	1119741	25			0.0207719
101_130_BN026.wiff	Ppp3ca	IITEGASILR	IITEGASILR	27.34	1206069	26			0.0223733
101_130_BN027.wiff	Ppp3ca	IITEGASILR	IITEGASILR	25.93	794178	27			0.0147325
101_130_BN028.wiff	Ppp3ca	IITEGASILR	IITEGASILR	25.78	528043	28			0.00979552
101_130_BN029.wiff	Ppp3ca	IITEGASILR	IITEGASILR	25.65	153747	29			0.0028521
101_130_BN030.wiff	Ppp3ca	IITEGASILR	IITEGASILR	25.37	208305	30			0.00386418
101_130_BN001.wiff	Ppp3cb	GLTPTGMLPSGVLAGGR	GLTPTGM[+16]LPSGVLAGGR	28.85	983	1		3337442	0.000294537
101_130_BN002.wiff	Ppp3cb	GLTPTGMLPSGVLAGGR	GLTPTGM[+16]LPSGVLAGGR	29.05	1657	2			0.000496488
101_130_BN003.wiff	Ppp3cb	GLTPTGMLPSGVLAGGR	GLTPTGM[+16]LPSGVLAGGR	28.73	4346	3			0.00130219
101_130_BN004.wiff	Ppp3cb	GLTPTGMLPSGVLAGGR	GLTPTGM[+16]LPSGVLAGGR	28.53	11096	4			0.0033247
101_130_BN005.wiff	Ppp3cb	GLTPTGMLPSGVLAGGR	GLTPTGM[+16]LPSGVLAGGR	28.44	17907	5			0.00536549
101_130_BN006.wiff	Ppp3cb	GLTPTGMLPSGVLAGGR	GLTPTGM[+16]LPSGVLAGGR	28.4	29052	6			0.00870487
101_130_BN007.wiff	Ppp3cb	GLTPTGMLPSGVLAGGR	GLTPTGM[+16]LPSGVLAGGR	28.29	88876	7			0.02663
101_130_BN008.wiff	Ppp3cb	GLTPTGMLPSGVLAGGR	GLTPTGM[+16]LPSGVLAGGR	28.27	390306	8			0.116948
101_130_BN009.wiff	Ppp3cb	GLTPTGMLPSGVLAGGR	GLTPTGM[+16]LPSGVLAGGR	28.22	290884	9			0.0871578
101_130_BN010.wiff	Ppp3cb	GLTPTGMLPSGVLAGGR	GLTPTGM[+16]LPSGVLAGGR	28.28	190328	10			0.0570281
101_130_BN011.wiff	Ppp3cb	GLTPTGMLPSGVLAGGR	GLTPTGM[+16]LPSGVLAGGR	28.28	94558	11			0.0283325
101_130_BN012.wiff	Ppp3cb	GLTPTGMLPSGVLAGGR	GLTPTGM[+16]LPSGVLAGGR	28.24	60702	12			0.0181882
101_130_BN013.wiff	Ppp3cb	GLTPTGMLPSGVLAGGR	GLTPTGM[+16]LPSGVLAGGR	28.25	83643	13			0.025062
101_130_BN014.wiff	Ppp3cb	GLTPTGMLPSGVLAGGR	GLTPTGM[+16]LPSGVLAGGR	28.2	95231	14			0.0285341
101_130_BN015.wiff	Ppp3cb	GLTPTGMLPSGVLAGGR	GLTPTGM[+16]LPSGVLAGGR	28.31	64117	15			0.0192114
101_130_BN016.wiff	Ppp3cb	GLTPTGMLPSGVLAGGR	GLTPTGM[+16]LPSGVLAGGR	28.26	69056	16			0.0206913
101_130_BN017.wiff	Ppp3cb	GLTPTGMLPSGVLAGGR	GLTPTGM[+16]LPSGVLAGGR	28.46	71337	17			0.0213748
101_130_BN018.wiff	Ppp3cb	GLTPTGMLPSGVLAGGR	GLTPTGM[+16]LPSGVLAGGR	28.49	86251	18			0.0258434
101_130_BN019.wiff	Ppp3cb	GLTPTGMLPSGVLAGGR	GLTPTGM[+16]LPSGVLAGGR	28.55	73674	19			0.022075
101_130_BN020.wiff	Ppp3cb	GLTPTGMLPSGVLAGGR	GLTPTGM[+16]LPSGVLAGGR	28.41	123349	20			0.0369591
101_130_BN021.wiff	Ppp3cb	GLTPTGMLPSGVLAGGR	GLTPTGM[+16]LPSGVLAGGR	28.33	280091	21			0.0839239
101_130_BN022.wiff	Ppp3cb	GLTPTGMLPSGVLAGGR	GLTPTGM[+16]LPSGVLAGGR	28.42	266121	22			0.079738
101_130_BN023.wiff	Ppp3cb	GLTPTGMLPSGVLAGGR	GLTPTGM[+16]LPSGVLAGGR	28.44	187408	23			0.0561532
101_130_BN024.wiff	Ppp3cb	GLTPTGMLPSGVLAGGR	GLTPTGM[+16]LPSGVLAGGR	28.51	176392	24			0.0528525
101_130_BN025.wiff	Ppp3cb	GLTPTGMLPSGVLAGGR	GLTPTGM[+16]LPSGVLAGGR	28.59	170973	25			0.0512288
101_130_BN026.wiff	Ppp3cb	GLTPTGMLPSGVLAGGR	GLTPTGM[+16]LPSGVLAGGR	30.04	132481	26			0.0396954
101_130_BN027.wiff	Ppp3cb	GLTPTGMLPSGVLAGGR	GLTPTGM[+16]LPSGVLAGGR	29.58	90761	27			0.0271948
101_130_BN028.wiff	Ppp3cb	GLTPTGMLPSGVLAGGR	GLTPTGM[+16]LPSGVLAGGR	28.56	78926	28			0.0236487
101_130_BN029.wiff	Ppp3cb	GLTPTGMLPSGVLAGGR	GLTPTGM[+16]LPSGVLAGGR	28.5	38216	29			0.0114507
101_130_BN030.wiff	Ppp3cb	GLTPTGMLPSGVLAGGR	GLTPTGM[+16]LPSGVLAGGR	28.18	68720	30			0.0205906
101_130_BN001.wiff	Ppp3cb	IINEGAAILR	IINEGAAILR	25.26	2857	1		2887522	0.00098943
101_130_BN002.wiff	Ppp3cb	IINEGAAILR	IINEGAAILR	25.16	6360	2			0.00220258
101_130_BN003.wiff	Ppp3cb	IINEGAAILR	IINEGAAILR	25.15	5381	3			0.00186354
101_130_BN004.wiff	Ppp3cb	IINEGAAILR	IINEGAAILR	24.93	10892	4			0.00377209
101_130_BN005.wiff	Ppp3cb	IINEGAAILR	IINEGAAILR	24.97	16283	5			0.00563909
101_130_BN006.wiff	Ppp3cb	IINEGAAILR	IINEGAAILR	24.88	26653	6			0.00923041
101_130_BN007.wiff	Ppp3cb	IINEGAAILR	IINEGAAILR	24.84	81376	7			0.0281819
101_130_BN008.wiff	Ppp3cb	IINEGAAILR	IINEGAAILR	24.77	379559	8			0.131448
101_130_BN009.wiff	Ppp3cb	IINEGAAILR	IINEGAAILR	24.71	280110	9			0.0970071
101_130_BN010.wiff	Ppp3cb	IINEGAAILR	IINEGAAILR	24.74	207243	10			0.0717719
101_130_BN011.wiff	Ppp3cb	IINEGAAILR	IINEGAAILR	24.77	100653	11			0.0348579
101_130_BN012.wiff	Ppp3cb	IINEGAAILR	IINEGAAILR	24.76	56903	12			0.0197065
101_130_BN013.wiff	Ppp3cb	IINEGAAILR	IINEGAAILR	24.78	71052	13			0.0246066
101_130_BN014.wiff	Ppp3cb	IINEGAAILR	IINEGAAILR	24.7	75585	14			0.0261764
101_130_BN015.wiff	Ppp3cb	IINEGAAILR	IINEGAAILR	24.81	47475	15			0.0164414
101_130_BN016.wiff	Ppp3cb	IINEGAAILR	IINEGAAILR	24.81	56274	16			0.0194887
101_130_BN017.wiff	Ppp3cb	IINEGAAILR	IINEGAAILR	25.03	66526	17			0.0230391
101_130_BN018.wiff	Ppp3cb	IINEGAAILR	IINEGAAILR	24.98	79960	18			0.0276916
101_130_BN019.wiff	Ppp3cb	IINEGAAILR	IINEGAAILR	25.09	60010	19			0.0207825
101_130_BN020.wiff	Ppp3cb	IINEGAAILR	IINEGAAILR	24.97	112382	20			0.0389199
101_130_BN021.wiff	Ppp3cb	IINEGAAILR	IINEGAAILR	24.87	250495	21			0.0867509
101_130_BN022.wiff	Ppp3cb	IINEGAAILR	IINEGAAILR	24.98	225574	22			0.0781203
101_130_BN023.wiff	Ppp3cb	IINEGAAILR	IINEGAAILR	24.96	174882	23			0.0605647
101_130_BN024.wiff	Ppp3cb	IINEGAAILR	IINEGAAILR	25.04	149006	24			0.0516034
101_130_BN025.wiff	Ppp3cb	IINEGAAILR	IINEGAAILR	25.08	106171	25			0.0367689
101_130_BN026.wiff	Ppp3cb	IINEGAAILR	IINEGAAILR	26.16	76421	26			0.0264659
101_130_BN027.wiff	Ppp3cb	IINEGAAILR	IINEGAAILR	25.16	59689	27			0.0206714
101_130_BN028.wiff	Ppp3cb	IINEGAAILR	IINEGAAILR	25.09	55914	28			0.019364
101_130_BN029.wiff	Ppp3cb	IINEGAAILR	IINEGAAILR	24.92	22379	29			0.00775024
101_130_BN030.wiff	Ppp3cb	IINEGAAILR	IINEGAAILR	24.65	23457	30			0.00812357
101_130_BN001.wiff	Ppp3r1	DTQLQQIVDK	DTQLQQIVDK	23.46	41480	1		6329135	0.00655382
101_130_BN002.wiff	Ppp3r1	DTQLQQIVDK	DTQLQQIVDK	23.65	39361	2			0.00621902
101_130_BN003.wiff	Ppp3r1	DTQLQQIVDK	DTQLQQIVDK	23.7	44740	3			0.0070689
101_130_BN004.wiff	Ppp3r1	DTQLQQIVDK	DTQLQQIVDK	23.55	51990	4			0.00821439
101_130_BN005.wiff	Ppp3r1	DTQLQQIVDK	DTQLQQIVDK	23.55	19546	5			0.00308826
101_130_BN006.wiff	Ppp3r1	DTQLQQIVDK	DTQLQQIVDK	23.51	34133	6			0.005393
101_130_BN007.wiff	Ppp3r1	DTQLQQIVDK	DTQLQQIVDK	23.45	65460	7			0.0103426
101_130_BN008.wiff	Ppp3r1	DTQLQQIVDK	DTQLQQIVDK	23.39	291510	8			0.0460584
101_130_BN009.wiff	Ppp3r1	DTQLQQIVDK	DTQLQQIVDK	23.38	332286	9			0.052501
101_130_BN010.wiff	Ppp3r1	DTQLQQIVDK	DTQLQQIVDK	23.4	394986	10			0.0624076
101_130_BN011.wiff	Ppp3r1	DTQLQQIVDK	DTQLQQIVDK	23.44	219555	11			0.0346896
101_130_BN012.wiff	Ppp3r1	DTQLQQIVDK	DTQLQQIVDK	23.4	105008	12			0.0165912
101_130_BN013.wiff	Ppp3r1	DTQLQQIVDK	DTQLQQIVDK	23.43	121310	13			0.0191669
101_130_BN014.wiff	Ppp3r1	DTQLQQIVDK	DTQLQQIVDK	23.35	168240	14			0.0265818
101_130_BN015.wiff	Ppp3r1	DTQLQQIVDK	DTQLQQIVDK	23.45	128210	15			0.0202571
101_130_BN016.wiff	Ppp3r1	DTQLQQIVDK	DTQLQQIVDK	23.49	156994	16			0.024805
101_130_BN017.wiff	Ppp3r1	DTQLQQIVDK	DTQLQQIVDK	23.63	154768	17			0.0244533
101_130_BN018.wiff	Ppp3r1	DTQLQQIVDK	DTQLQQIVDK	23.64	272084	18			0.0429891
101_130_BN019.wiff	Ppp3r1	DTQLQQIVDK	DTQLQQIVDK	23.71	130018	19			0.0205428
101_130_BN020.wiff	Ppp3r1	DTQLQQIVDK	DTQLQQIVDK	23.6	390290	20			0.0616656
101_130_BN021.wiff	Ppp3r1	DTQLQQIVDK	DTQLQQIVDK	23.57	800902	21			0.126542
101_130_BN022.wiff	Ppp3r1	DTQLQQIVDK	DTQLQQIVDK	23.63	650320	22			0.10275
101_130_BN023.wiff	Ppp3r1	DTQLQQIVDK	DTQLQQIVDK	23.57	538859	23			0.0851394
101_130_BN024.wiff	Ppp3r1	DTQLQQIVDK	DTQLQQIVDK	23.64	444681	24			0.0702594
101_130_BN025.wiff	Ppp3r1	DTQLQQIVDK	DTQLQQIVDK	23.64	280468	25			0.0443138
101_130_BN026.wiff	Ppp3r1	DTQLQQIVDK	DTQLQQIVDK	23.7	139004	26			0.0219626
101_130_BN027.wiff	Ppp3r1	DTQLQQIVDK	DTQLQQIVDK	23.79	109985	27			0.0173776
101_130_BN028.wiff	Ppp3r1	DTQLQQIVDK	DTQLQQIVDK	23.67	80946	28			0.0127894
101_130_BN029.wiff	Ppp3r1	DTQLQQIVDK	DTQLQQIVDK	23.54	54469	29			0.00860607
101_130_BN030.wiff	Ppp3r1	DTQLQQIVDK	DTQLQQIVDK	23.39	67532	30			0.01067
101_130_BN001.wiff	Ppp3r1	KLDLDNSGSLSVEEFMSLPELQQNPLVQR	KLDLDNSGSLSVEEFM[+16]SLPELQQNPLVQR	39.7	79191	1		10493861	0.00754641
101_130_BN002.wiff	Ppp3r1	KLDLDNSGSLSVEEFMSLPELQQNPLVQR	KLDLDNSGSLSVEEFM[+16]SLPELQQNPLVQR	39.23	123533	2			0.0117719
101_130_BN003.wiff	Ppp3r1	KLDLDNSGSLSVEEFMSLPELQQNPLVQR	KLDLDNSGSLSVEEFM[+16]SLPELQQNPLVQR	37.42	151498	3			0.0144368
101_130_BN004.wiff	Ppp3r1	KLDLDNSGSLSVEEFMSLPELQQNPLVQR	KLDLDNSGSLSVEEFM[+16]SLPELQQNPLVQR	37.36	171102	4			0.016305
101_130_BN005.wiff	Ppp3r1	KLDLDNSGSLSVEEFMSLPELQQNPLVQR	KLDLDNSGSLSVEEFM[+16]SLPELQQNPLVQR	37.64	120395	5			0.0114729
101_130_BN006.wiff	Ppp3r1	KLDLDNSGSLSVEEFMSLPELQQNPLVQR	KLDLDNSGSLSVEEFM[+16]SLPELQQNPLVQR	37.12	92690	6			0.00883278
101_130_BN007.wiff	Ppp3r1	KLDLDNSGSLSVEEFMSLPELQQNPLVQR	KLDLDNSGSLSVEEFM[+16]SLPELQQNPLVQR	37.02	208221	7			0.0198422
101_130_BN008.wiff	Ppp3r1	KLDLDNSGSLSVEEFMSLPELQQNPLVQR	KLDLDNSGSLSVEEFM[+16]SLPELQQNPLVQR	36.99	666135	8			0.0634785
101_130_BN009.wiff	Ppp3r1	KLDLDNSGSLSVEEFMSLPELQQNPLVQR	KLDLDNSGSLSVEEFM[+16]SLPELQQNPLVQR	36.93	454812	9			0.0433408
101_130_BN010.wiff	Ppp3r1	KLDLDNSGSLSVEEFMSLPELQQNPLVQR	KLDLDNSGSLSVEEFM[+16]SLPELQQNPLVQR	37.03	567945	10			0.0541216
101_130_BN011.wiff	Ppp3r1	KLDLDNSGSLSVEEFMSLPELQQNPLVQR	KLDLDNSGSLSVEEFM[+16]SLPELQQNPLVQR	36.92	357935	11			0.034109
101_130_BN012.wiff	Ppp3r1	KLDLDNSGSLSVEEFMSLPELQQNPLVQR	KLDLDNSGSLSVEEFM[+16]SLPELQQNPLVQR	37.05	194415	12			0.0185265
101_130_BN013.wiff	Ppp3r1	KLDLDNSGSLSVEEFMSLPELQQNPLVQR	KLDLDNSGSLSVEEFM[+16]SLPELQQNPLVQR	36.92	296747	13			0.0282782
101_130_BN014.wiff	Ppp3r1	KLDLDNSGSLSVEEFMSLPELQQNPLVQR	KLDLDNSGSLSVEEFM[+16]SLPELQQNPLVQR	36.85	274629	14			0.0261704
101_130_BN015.wiff	Ppp3r1	KLDLDNSGSLSVEEFMSLPELQQNPLVQR	KLDLDNSGSLSVEEFM[+16]SLPELQQNPLVQR	37.05	235765	15			0.0224669
101_130_BN016.wiff	Ppp3r1	KLDLDNSGSLSVEEFMSLPELQQNPLVQR	KLDLDNSGSLSVEEFM[+16]SLPELQQNPLVQR	37.19	232470	16			0.022153
101_130_BN017.wiff	Ppp3r1	KLDLDNSGSLSVEEFMSLPELQQNPLVQR	KLDLDNSGSLSVEEFM[+16]SLPELQQNPLVQR	37.25	261137	17			0.0248847
101_130_BN018.wiff	Ppp3r1	KLDLDNSGSLSVEEFMSLPELQQNPLVQR	KLDLDNSGSLSVEEFM[+16]SLPELQQNPLVQR	37.3	248685	18			0.0236981
101_130_BN019.wiff	Ppp3r1	KLDLDNSGSLSVEEFMSLPELQQNPLVQR	KLDLDNSGSLSVEEFM[+16]SLPELQQNPLVQR	37.44	180598	19			0.0172099
101_130_BN020.wiff	Ppp3r1	KLDLDNSGSLSVEEFMSLPELQQNPLVQR	KLDLDNSGSLSVEEFM[+16]SLPELQQNPLVQR	37.18	380145	20			0.0362255
101_130_BN021.wiff	Ppp3r1	KLDLDNSGSLSVEEFMSLPELQQNPLVQR	KLDLDNSGSLSVEEFM[+16]SLPELQQNPLVQR	37.38	1373166	21			0.130854
101_130_BN022.wiff	Ppp3r1	KLDLDNSGSLSVEEFMSLPELQQNPLVQR	KLDLDNSGSLSVEEFM[+16]SLPELQQNPLVQR	37.23	1004702	22			0.0957419
101_130_BN023.wiff	Ppp3r1	KLDLDNSGSLSVEEFMSLPELQQNPLVQR	KLDLDNSGSLSVEEFM[+16]SLPELQQNPLVQR	37.4	770748	23			0.0734475
101_130_BN024.wiff	Ppp3r1	KLDLDNSGSLSVEEFMSLPELQQNPLVQR	KLDLDNSGSLSVEEFM[+16]SLPELQQNPLVQR	38.55	696182	24			0.0663418
101_130_BN025.wiff	Ppp3r1	KLDLDNSGSLSVEEFMSLPELQQNPLVQR	KLDLDNSGSLSVEEFM[+16]SLPELQQNPLVQR	39.25	529422	25			0.0504506
101_130_BN026.wiff	Ppp3r1	KLDLDNSGSLSVEEFMSLPELQQNPLVQR	KLDLDNSGSLSVEEFM[+16]SLPELQQNPLVQR	41.37	271613	26			0.025883
101_130_BN027.wiff	Ppp3r1	KLDLDNSGSLSVEEFMSLPELQQNPLVQR	KLDLDNSGSLSVEEFM[+16]SLPELQQNPLVQR	41.03	154805	27			0.014752
101_130_BN028.wiff	Ppp3r1	KLDLDNSGSLSVEEFMSLPELQQNPLVQR	KLDLDNSGSLSVEEFM[+16]SLPELQQNPLVQR	37.53	247728	28			0.0236069
101_130_BN029.wiff	Ppp3r1	KLDLDNSGSLSVEEFMSLPELQQNPLVQR	KLDLDNSGSLSVEEFM[+16]SLPELQQNPLVQR	37.18	80354	29			0.00765724
101_130_BN030.wiff	Ppp3r1	KLDLDNSGSLSVEEFMSLPELQQNPLVQR	KLDLDNSGSLSVEEFM[+16]SLPELQQNPLVQR	36.76	67093	30			0.00639355
101_130_BN001.wiff	Shank1	FLEYVQLGTSDK	FLEYVQLGTSDK	30.3	433	1		485538	0.000891794
101_130_BN002.wiff	Shank1	FLEYVQLGTSDK	FLEYVQLGTSDK	30.33	1236	2			0.00254563
101_130_BN003.wiff	Shank1	FLEYVQLGTSDK	FLEYVQLGTSDK	29.66	271	3			0.000558144
101_130_BN004.wiff	Shank1	FLEYVQLGTSDK	FLEYVQLGTSDK	29.65	764	4			0.00157351
101_130_BN005.wiff	Shank1	FLEYVQLGTSDK	FLEYVQLGTSDK	29.71	1913	5			0.00393996
101_130_BN006.wiff	Shank1	FLEYVQLGTSDK	FLEYVQLGTSDK	29.71	616	6			0.0012687
101_130_BN007.wiff	Shank1	FLEYVQLGTSDK	FLEYVQLGTSDK	29.49	1653	7			0.00340447
101_130_BN008.wiff	Shank1	FLEYVQLGTSDK	FLEYVQLGTSDK	29.94	3887	8			0.00800555
101_130_BN009.wiff	Shank1	FLEYVQLGTSDK	FLEYVQLGTSDK	29.48	1720	9			0.00354246
101_130_BN010.wiff	Shank1	FLEYVQLGTSDK	FLEYVQLGTSDK	29.05	737	10			0.0015179
101_130_BN011.wiff	Shank1	FLEYVQLGTSDK	FLEYVQLGTSDK	29.06	1244	11			0.00256211
101_130_BN012.wiff	Shank1	FLEYVQLGTSDK	FLEYVQLGTSDK	29.61	1111	12			0.00228818
101_130_BN013.wiff	Shank1	FLEYVQLGTSDK	FLEYVQLGTSDK	29.52	1327	13			0.00273305
101_130_BN014.wiff	Shank1	FLEYVQLGTSDK	FLEYVQLGTSDK	29.51	1092	14			0.00224905
101_130_BN015.wiff	Shank1	FLEYVQLGTSDK	FLEYVQLGTSDK	29.97	1578	15			0.00325
101_130_BN016.wiff	Shank1	FLEYVQLGTSDK	FLEYVQLGTSDK	29.52	1781	16			0.0036681
101_130_BN017.wiff	Shank1	FLEYVQLGTSDK	FLEYVQLGTSDK	29.64	1462	17			0.00301109
101_130_BN018.wiff	Shank1	FLEYVQLGTSDK	FLEYVQLGTSDK	29.67	7199	18			0.0148269
101_130_BN019.wiff	Shank1	FLEYVQLGTSDK	FLEYVQLGTSDK	29.81	6511	19			0.0134099
101_130_BN020.wiff	Shank1	FLEYVQLGTSDK	FLEYVQLGTSDK	29.61	6324	20			0.0130247
101_130_BN021.wiff	Shank1	FLEYVQLGTSDK	FLEYVQLGTSDK	29.46	14216	21			0.0292789
101_130_BN022.wiff	Shank1	FLEYVQLGTSDK	FLEYVQLGTSDK	29.63	12675	22			0.0261051
101_130_BN023.wiff	Shank1	FLEYVQLGTSDK	FLEYVQLGTSDK	29.6	12748	23			0.0262554
101_130_BN024.wiff	Shank1	FLEYVQLGTSDK	FLEYVQLGTSDK	29.77	11867	24			0.0244409
101_130_BN025.wiff	Shank1	FLEYVQLGTSDK	FLEYVQLGTSDK	29.74	15431	25			0.0317812
101_130_BN026.wiff	Shank1	FLEYVQLGTSDK	FLEYVQLGTSDK	31.81	67121	26			0.13824
101_130_BN027.wiff	Shank1	FLEYVQLGTSDK	FLEYVQLGTSDK	31.09	100192	27			0.206353
101_130_BN028.wiff	Shank1	FLEYVQLGTSDK	FLEYVQLGTSDK	29.76	105767	28			0.217835
101_130_BN029.wiff	Shank1	FLEYVQLGTSDK	FLEYVQLGTSDK	29.6	48557	29			0.100007
101_130_BN030.wiff	Shank1	FLEYVQLGTSDK	FLEYVQLGTSDK	29.32	54105	30			0.111433
101_130_BN001.wiff	Shank1	FNPDATIWTAK	FNPDATIWTAK	29.37	659	1		397841	0.00165644
101_130_BN002.wiff	Shank1	FNPDATIWTAK	FNPDATIWTAK	29.72	1311	2			0.00329529
101_130_BN003.wiff	Shank1	FNPDATIWTAK	FNPDATIWTAK	28.85	2865	3			0.00720137
101_130_BN004.wiff	Shank1	FNPDATIWTAK	FNPDATIWTAK	28.8	4063	4			0.0102126
101_130_BN005.wiff	Shank1	FNPDATIWTAK	FNPDATIWTAK	28.96	3636	5			0.00913933
101_130_BN006.wiff	Shank1	FNPDATIWTAK	FNPDATIWTAK	28.8	3225	6			0.00810625
101_130_BN007.wiff	Shank1	FNPDATIWTAK	FNPDATIWTAK	28.46	8312	7			0.0208928
101_130_BN008.wiff	Shank1	FNPDATIWTAK	FNPDATIWTAK	28.67	7129	8			0.0179192
101_130_BN009.wiff	Shank1	FNPDATIWTAK	FNPDATIWTAK	28.62	8271	9			0.0207897
101_130_BN010.wiff	Shank1	FNPDATIWTAK	FNPDATIWTAK	28.79	7543	10			0.0189598
101_130_BN011.wiff	Shank1	FNPDATIWTAK	FNPDATIWTAK	28.62	2174	11			0.00546449
101_130_BN012.wiff	Shank1	FNPDATIWTAK	FNPDATIWTAK	28.96	5181	12			0.0130228
101_130_BN013.wiff	Shank1	FNPDATIWTAK	FNPDATIWTAK	28.69	3185	13			0.00800571
101_130_BN014.wiff	Shank1	FNPDATIWTAK	FNPDATIWTAK	28.68	3624	14			0.00910917
101_130_BN015.wiff	Shank1	FNPDATIWTAK	FNPDATIWTAK	29.19	7274	15			0.0182837
101_130_BN016.wiff	Shank1	FNPDATIWTAK	FNPDATIWTAK	28.74	7075	16			0.0177835
101_130_BN017.wiff	Shank1	FNPDATIWTAK	FNPDATIWTAK	29	6019	17			0.0151292
101_130_BN018.wiff	Shank1	FNPDATIWTAK	FNPDATIWTAK	28.87	9346	18			0.0234918
101_130_BN019.wiff	Shank1	FNPDATIWTAK	FNPDATIWTAK	28.93	14735	19			0.0370374
101_130_BN020.wiff	Shank1	FNPDATIWTAK	FNPDATIWTAK	28.78	6764	20			0.0170018
101_130_BN021.wiff	Shank1	FNPDATIWTAK	FNPDATIWTAK	28.67	6650	21			0.0167152
101_130_BN022.wiff	Shank1	FNPDATIWTAK	FNPDATIWTAK	28.83	5468	22			0.0137442
101_130_BN023.wiff	Shank1	FNPDATIWTAK	FNPDATIWTAK	28.81	6570	23			0.0165141
101_130_BN024.wiff	Shank1	FNPDATIWTAK	FNPDATIWTAK	28.92	12233	24			0.0307485
101_130_BN025.wiff	Shank1	FNPDATIWTAK	FNPDATIWTAK	28.89	17842	25			0.0448471
101_130_BN026.wiff	Shank1	FNPDATIWTAK	FNPDATIWTAK	31.18	26127	26			0.065672
101_130_BN027.wiff	Shank1	FNPDATIWTAK	FNPDATIWTAK	30.15	71541	27			0.179823
101_130_BN028.wiff	Shank1	FNPDATIWTAK	FNPDATIWTAK	28.94	74747	28			0.187882
101_130_BN029.wiff	Shank1	FNPDATIWTAK	FNPDATIWTAK	28.77	34232	29			0.0860444
101_130_BN030.wiff	Shank1	FNPDATIWTAK	FNPDATIWTAK	28.45	30040	30			0.0755076
101_130_BN001.wiff	Shank2	IFLSGITEEER	IFLSGITEEER	29.83	658	1		301878	0.00217969
101_130_BN002.wiff	Shank2	IFLSGITEEER	IFLSGITEEER	30.03	1742	2			0.00577054
101_130_BN003.wiff	Shank2	IFLSGITEEER	IFLSGITEEER	29.19	2166	3			0.00717508
101_130_BN004.wiff	Shank2	IFLSGITEEER	IFLSGITEEER	29.01	2364	4			0.00783098
101_130_BN005.wiff	Shank2	IFLSGITEEER	IFLSGITEEER	29.28	592	5			0.00196106
101_130_BN006.wiff	Shank2	IFLSGITEEER	IFLSGITEEER	29.17	5684	6			0.0188288
101_130_BN007.wiff	Shank2	IFLSGITEEER	IFLSGITEEER	28.99	3880	7			0.0128529
101_130_BN008.wiff	Shank2	IFLSGITEEER	IFLSGITEEER	28.93	8004	8			0.026514
101_130_BN009.wiff	Shank2	IFLSGITEEER	IFLSGITEEER	28.63	3616	9			0.0119783
101_130_BN010.wiff	Shank2	IFLSGITEEER	IFLSGITEEER	28.76	3070	10			0.0101697
101_130_BN011.wiff	Shank2	IFLSGITEEER	IFLSGITEEER	29.02	5301	11			0.0175601
101_130_BN012.wiff	Shank2	IFLSGITEEER	IFLSGITEEER	28.98	6597	12			0.0218532
101_130_BN013.wiff	Shank2	IFLSGITEEER	IFLSGITEEER	28.96	4201	13			0.0139162
101_130_BN014.wiff	Shank2	IFLSGITEEER	IFLSGITEEER	28.97	3190	14			0.0105672
101_130_BN015.wiff	Shank2	IFLSGITEEER	IFLSGITEEER	29.32	2884	15			0.00955353
101_130_BN016.wiff	Shank2	IFLSGITEEER	IFLSGITEEER	29.12	4385	16			0.0145257
101_130_BN017.wiff	Shank2	IFLSGITEEER	IFLSGITEEER	29.28	5178	17			0.0171526
101_130_BN018.wiff	Shank2	IFLSGITEEER	IFLSGITEEER	29.31	5372	18			0.0177953
101_130_BN019.wiff	Shank2	IFLSGITEEER	IFLSGITEEER	29.58	9040	19			0.0299459
101_130_BN020.wiff	Shank2	IFLSGITEEER	IFLSGITEEER	29.25	5684	20			0.0188288
101_130_BN021.wiff	Shank2	IFLSGITEEER	IFLSGITEEER	29.49	7338	21			0.0243078
101_130_BN022.wiff	Shank2	IFLSGITEEER	IFLSGITEEER	29.23	6610	22			0.0218963
101_130_BN023.wiff	Shank2	IFLSGITEEER	IFLSGITEEER	29.27	7679	23			0.0254374
101_130_BN024.wiff	Shank2	IFLSGITEEER	IFLSGITEEER	29.37	9317	24			0.0308635
101_130_BN025.wiff	Shank2	IFLSGITEEER	IFLSGITEEER	29.42	28292	25			0.09372
101_130_BN026.wiff	Shank2	IFLSGITEEER	IFLSGITEEER	31.32	47604	26			0.157693
101_130_BN027.wiff	Shank2	IFLSGITEEER	IFLSGITEEER	31.22	40803	27			0.135164
101_130_BN028.wiff	Shank2	IFLSGITEEER	IFLSGITEEER	29.41	25751	28			0.0853027
101_130_BN029.wiff	Shank2	IFLSGITEEER	IFLSGITEEER	29.22	19227	29			0.0636913
101_130_BN030.wiff	Shank2	IFLSGITEEER	IFLSGITEEER	28.92	25649	30			0.0849648
101_130_BN001.wiff	Shank2	LLDPSSPLALALSAR	LLDPSSPLALALSAR	40.25	4985	1		474956	0.0104957
101_130_BN002.wiff	Shank2	LLDPSSPLALALSAR	LLDPSSPLALALSAR	40.47	2797	2			0.00588897
101_130_BN003.wiff	Shank2	LLDPSSPLALALSAR	LLDPSSPLALALSAR	39.51	3486	3			0.00733963
101_130_BN004.wiff	Shank2	LLDPSSPLALALSAR	LLDPSSPLALALSAR	38.92	3088	4			0.00650165
101_130_BN005.wiff	Shank2	LLDPSSPLALALSAR	LLDPSSPLALALSAR	39.34	1720	5			0.00362139
101_130_BN006.wiff	Shank2	LLDPSSPLALALSAR	LLDPSSPLALALSAR	39	2939	6			0.00618794
101_130_BN007.wiff	Shank2	LLDPSSPLALALSAR	LLDPSSPLALALSAR	38.82	3509	7			0.00738805
101_130_BN008.wiff	Shank2	LLDPSSPLALALSAR	LLDPSSPLALALSAR	38.83	1199	8			0.00252444
101_130_BN009.wiff	Shank2	LLDPSSPLALALSAR	LLDPSSPLALALSAR	38.72	1619	9			0.00340874
101_130_BN010.wiff	Shank2	LLDPSSPLALALSAR	LLDPSSPLALALSAR	39.15	4049	10			0.008525
101_130_BN011.wiff	Shank2	LLDPSSPLALALSAR	LLDPSSPLALALSAR	38.6	2913	11			0.0061332
101_130_BN012.wiff	Shank2	LLDPSSPLALALSAR	LLDPSSPLALALSAR	38.92	1200	12			0.00252655
101_130_BN013.wiff	Shank2	LLDPSSPLALALSAR	LLDPSSPLALALSAR	38.73	7307	13			0.0153846
101_130_BN014.wiff	Shank2	LLDPSSPLALALSAR	LLDPSSPLALALSAR	38.53	6282	14			0.0132265
101_130_BN015.wiff	Shank2	LLDPSSPLALALSAR	LLDPSSPLALALSAR	38.79	8699	15			0.0183154
101_130_BN016.wiff	Shank2	LLDPSSPLALALSAR	LLDPSSPLALALSAR	38.76	10728	16			0.0225874
101_130_BN017.wiff	Shank2	LLDPSSPLALALSAR	LLDPSSPLALALSAR	39.02	14335	17			0.0301817
101_130_BN018.wiff	Shank2	LLDPSSPLALALSAR	LLDPSSPLALALSAR	39.04	18106	18			0.0381214
101_130_BN019.wiff	Shank2	LLDPSSPLALALSAR	LLDPSSPLALALSAR	39.17	14025	19			0.0295291
101_130_BN020.wiff	Shank2	LLDPSSPLALALSAR	LLDPSSPLALALSAR	38.93	14392	20			0.0303018
101_130_BN021.wiff	Shank2	LLDPSSPLALALSAR	LLDPSSPLALALSAR	38.86	19543	21			0.041147
101_130_BN022.wiff	Shank2	LLDPSSPLALALSAR	LLDPSSPLALALSAR	38.98	15406	22			0.0324367
101_130_BN023.wiff	Shank2	LLDPSSPLALALSAR	LLDPSSPLALALSAR	39.06	15718	23			0.0330936
101_130_BN024.wiff	Shank2	LLDPSSPLALALSAR	LLDPSSPLALALSAR	39.67	13740	24			0.028929
101_130_BN025.wiff	Shank2	LLDPSSPLALALSAR	LLDPSSPLALALSAR	40.11	19988	25			0.0420839
101_130_BN026.wiff	Shank2	LLDPSSPLALALSAR	LLDPSSPLALALSAR	42.41	86729	26			0.182604
101_130_BN027.wiff	Shank2	LLDPSSPLALALSAR	LLDPSSPLALALSAR	42.34	70443	27			0.148315
101_130_BN028.wiff	Shank2	LLDPSSPLALALSAR	LLDPSSPLALALSAR	39.28	46868	28			0.0986786
101_130_BN029.wiff	Shank2	LLDPSSPLALALSAR	LLDPSSPLALALSAR	38.92	26880	29			0.0565947
101_130_BN030.wiff	Shank2	LLDPSSPLALALSAR	LLDPSSPLALALSAR	38.42	32263	30			0.0679284
101_130_BN001.wiff	Shisa6	GTLPLNVIQMSQQKPLPR	GTLPLNVIQM[+16]SQQKPLPR	27.93	559	1		503967	0.0011092
101_130_BN002.wiff	Shisa6	GTLPLNVIQMSQQKPLPR	GTLPLNVIQM[+16]SQQKPLPR	28.2	1658	2			0.0032899
101_130_BN003.wiff	Shisa6	GTLPLNVIQMSQQKPLPR	GTLPLNVIQM[+16]SQQKPLPR	27.7	3039	3			0.00603016
101_130_BN004.wiff	Shisa6	GTLPLNVIQMSQQKPLPR	GTLPLNVIQM[+16]SQQKPLPR	27.54	6411	4			0.0127211
101_130_BN005.wiff	Shisa6	GTLPLNVIQMSQQKPLPR	GTLPLNVIQM[+16]SQQKPLPR	27.57	3609	5			0.00716118
101_130_BN006.wiff	Shisa6	GTLPLNVIQMSQQKPLPR	GTLPLNVIQM[+16]SQQKPLPR	27.51	3356	6			0.00665917
101_130_BN007.wiff	Shisa6	GTLPLNVIQMSQQKPLPR	GTLPLNVIQM[+16]SQQKPLPR	27.44	3124	7			0.00619882
101_130_BN008.wiff	Shisa6	GTLPLNVIQMSQQKPLPR	GTLPLNVIQM[+16]SQQKPLPR	27.46	2467	8			0.00489516
101_130_BN009.wiff	Shisa6	GTLPLNVIQMSQQKPLPR	GTLPLNVIQM[+16]SQQKPLPR	27.39	8107	9			0.0160864
101_130_BN010.wiff	Shisa6	GTLPLNVIQMSQQKPLPR	GTLPLNVIQM[+16]SQQKPLPR	27.41	8551	10			0.0169674
101_130_BN011.wiff	Shisa6	GTLPLNVIQMSQQKPLPR	GTLPLNVIQM[+16]SQQKPLPR	27.35	2381	11			0.00472452
101_130_BN012.wiff	Shisa6	GTLPLNVIQMSQQKPLPR	GTLPLNVIQM[+16]SQQKPLPR	27.41	4438	12			0.00880613
101_130_BN013.wiff	Shisa6	GTLPLNVIQMSQQKPLPR	GTLPLNVIQM[+16]SQQKPLPR	27.4	3181	13			0.00631192
101_130_BN014.wiff	Shisa6	GTLPLNVIQMSQQKPLPR	GTLPLNVIQM[+16]SQQKPLPR	27.34	5416	14			0.0107467
101_130_BN015.wiff	Shisa6	GTLPLNVIQMSQQKPLPR	GTLPLNVIQM[+16]SQQKPLPR	27.45	4343	15			0.00861763
101_130_BN016.wiff	Shisa6	GTLPLNVIQMSQQKPLPR	GTLPLNVIQM[+16]SQQKPLPR	27.43	7894	16			0.0156637
101_130_BN017.wiff	Shisa6	GTLPLNVIQMSQQKPLPR	GTLPLNVIQM[+16]SQQKPLPR	27.62	6010	17			0.0119254
101_130_BN018.wiff	Shisa6	GTLPLNVIQMSQQKPLPR	GTLPLNVIQM[+16]SQQKPLPR	27.63	6850	18			0.0135922
101_130_BN019.wiff	Shisa6	GTLPLNVIQMSQQKPLPR	GTLPLNVIQM[+16]SQQKPLPR	27.71	11909	19			0.0236305
101_130_BN020.wiff	Shisa6	GTLPLNVIQMSQQKPLPR	GTLPLNVIQM[+16]SQQKPLPR	27.57	8754	20			0.0173702
101_130_BN021.wiff	Shisa6	GTLPLNVIQMSQQKPLPR	GTLPLNVIQM[+16]SQQKPLPR	27.67	6738	21			0.0133699
101_130_BN022.wiff	Shisa6	GTLPLNVIQMSQQKPLPR	GTLPLNVIQM[+16]SQQKPLPR	27.57	20039	22			0.0397625
101_130_BN023.wiff	Shisa6	GTLPLNVIQMSQQKPLPR	GTLPLNVIQM[+16]SQQKPLPR	27.6	16740	23			0.0332165
101_130_BN024.wiff	Shisa6	GTLPLNVIQMSQQKPLPR	GTLPLNVIQM[+16]SQQKPLPR	27.65	17340	24			0.034407
101_130_BN025.wiff	Shisa6	GTLPLNVIQMSQQKPLPR	GTLPLNVIQM[+16]SQQKPLPR	27.69	59153	25			0.117375
101_130_BN026.wiff	Shisa6	GTLPLNVIQMSQQKPLPR	GTLPLNVIQM[+16]SQQKPLPR	29.4	60935	26			0.120911
101_130_BN027.wiff	Shisa6	GTLPLNVIQMSQQKPLPR	GTLPLNVIQM[+16]SQQKPLPR	29.27	77127	27			0.15304
101_130_BN028.wiff	Shisa6	GTLPLNVIQMSQQKPLPR	GTLPLNVIQM[+16]SQQKPLPR	27.74	31509	28			0.062522
101_130_BN029.wiff	Shisa6	GTLPLNVIQMSQQKPLPR	GTLPLNVIQM[+16]SQQKPLPR	27.52	34830	29			0.0691117
101_130_BN030.wiff	Shisa6	GTLPLNVIQMSQQKPLPR	GTLPLNVIQM[+16]SQQKPLPR	27.26	77499	30			0.153778
101_130_BN001.wiff	Shisa6	ILSDEQLLSTER	ILSDEQLLSTER	26.24	1420	1		106723	0.0133055
101_130_BN002.wiff	Shisa6	ILSDEQLLSTER	ILSDEQLLSTER	26.32	1459	2			0.0136709
101_130_BN003.wiff	Shisa6	ILSDEQLLSTER	ILSDEQLLSTER	26.4	1633	3			0.0153013
101_130_BN004.wiff	Shisa6	ILSDEQLLSTER	ILSDEQLLSTER	26.25	1552	4			0.0145423
101_130_BN005.wiff	Shisa6	ILSDEQLLSTER	ILSDEQLLSTER	26.35	1500	5			0.0140551
101_130_BN006.wiff	Shisa6	ILSDEQLLSTER	ILSDEQLLSTER	25.87	209	6			0.00195834
101_130_BN007.wiff	Shisa6	ILSDEQLLSTER	ILSDEQLLSTER	25.83	1368	7			0.0128182
101_130_BN008.wiff	Shisa6	ILSDEQLLSTER	ILSDEQLLSTER	25.85	1922	8			0.0180092
101_130_BN009.wiff	Shisa6	ILSDEQLLSTER	ILSDEQLLSTER	26.07	742	9			0.00695258
101_130_BN010.wiff	Shisa6	ILSDEQLLSTER	ILSDEQLLSTER	25.83	1704	10			0.0159666
101_130_BN011.wiff	Shisa6	ILSDEQLLSTER	ILSDEQLLSTER	26.09	1244	11			0.0116563
101_130_BN012.wiff	Shisa6	ILSDEQLLSTER	ILSDEQLLSTER	26.14	1101	12			0.0103164
101_130_BN013.wiff	Shisa6	ILSDEQLLSTER	ILSDEQLLSTER	26.08	2630	13			0.0246432
101_130_BN014.wiff	Shisa6	ILSDEQLLSTER	ILSDEQLLSTER	26.03	2177	14			0.0203986
101_130_BN015.wiff	Shisa6	ILSDEQLLSTER	ILSDEQLLSTER	26.13	1758	15			0.0164726
101_130_BN016.wiff	Shisa6	ILSDEQLLSTER	ILSDEQLLSTER	26.11	2058	16			0.0192836
101_130_BN017.wiff	Shisa6	ILSDEQLLSTER	ILSDEQLLSTER	26.31	2593	17			0.0242965
101_130_BN018.wiff	Shisa6	ILSDEQLLSTER	ILSDEQLLSTER	26.28	2319	18			0.0217291
101_130_BN019.wiff	Shisa6	ILSDEQLLSTER	ILSDEQLLSTER	26.35	2423	19			0.0227036
101_130_BN020.wiff	Shisa6	ILSDEQLLSTER	ILSDEQLLSTER	26.27	2878	20			0.026967
101_130_BN021.wiff	Shisa6	ILSDEQLLSTER	ILSDEQLLSTER	26.19	2228	21			0.0208765
101_130_BN022.wiff	Shisa6	ILSDEQLLSTER	ILSDEQLLSTER	26.23	2862	22			0.0268171
101_130_BN023.wiff	Shisa6	ILSDEQLLSTER	ILSDEQLLSTER	26.27	2000	23			0.0187401
101_130_BN024.wiff	Shisa6	ILSDEQLLSTER	ILSDEQLLSTER	26.35	2334	24			0.0218697
101_130_BN025.wiff	Shisa6	ILSDEQLLSTER	ILSDEQLLSTER	26.39	3960	25			0.0371054
101_130_BN026.wiff	Shisa6	ILSDEQLLSTER	ILSDEQLLSTER	27.04	2931	26			0.0274636
101_130_BN027.wiff	Shisa6	ILSDEQLLSTER	ILSDEQLLSTER	27.29	5634	27			0.0527909
101_130_BN028.wiff	Shisa6	ILSDEQLLSTER	ILSDEQLLSTER	26.38	16128	28			0.15112
101_130_BN029.wiff	Shisa6	ILSDEQLLSTER	ILSDEQLLSTER	26.23	13960	29			0.130806
101_130_BN030.wiff	Shisa6	ILSDEQLLSTER	ILSDEQLLSTER	25.92	19996	30			0.187364
101_130_BN001.wiff	SIK3	AAAAASGAGGVAVAGAGGAGPAGR	A[+42]AAAASGAGGVAVAGAGGAGPAGR	23.04	763	1		1206741	0.000632281
101_130_BN002.wiff	SIK3	AAAAASGAGGVAVAGAGGAGPAGR	A[+42]AAAASGAGGVAVAGAGGAGPAGR	23.52	917	2			0.000759898
101_130_BN003.wiff	SIK3	AAAAASGAGGVAVAGAGGAGPAGR	A[+42]AAAASGAGGVAVAGAGGAGPAGR	23.18	590	3			0.00048892
101_130_BN004.wiff	SIK3	AAAAASGAGGVAVAGAGGAGPAGR	A[+42]AAAASGAGGVAVAGAGGAGPAGR	23.34	1617	4			0.00133997
101_130_BN005.wiff	SIK3	AAAAASGAGGVAVAGAGGAGPAGR	A[+42]AAAASGAGGVAVAGAGGAGPAGR	23.26	747	5			0.000619023
101_130_BN006.wiff	SIK3	AAAAASGAGGVAVAGAGGAGPAGR	A[+42]AAAASGAGGVAVAGAGGAGPAGR	23.22	1037	6			0.000859339
101_130_BN007.wiff	SIK3	AAAAASGAGGVAVAGAGGAGPAGR	A[+42]AAAASGAGGVAVAGAGGAGPAGR	22.8	730	7			0.000604935
101_130_BN008.wiff	SIK3	AAAAASGAGGVAVAGAGGAGPAGR	A[+42]AAAASGAGGVAVAGAGGAGPAGR	23.25	1684	8			0.00139549
101_130_BN009.wiff	SIK3	AAAAASGAGGVAVAGAGGAGPAGR	A[+42]AAAASGAGGVAVAGAGGAGPAGR	22.94	2527	9			0.00209407
101_130_BN010.wiff	SIK3	AAAAASGAGGVAVAGAGGAGPAGR	A[+42]AAAASGAGGVAVAGAGGAGPAGR	22.94	8077	10			0.00669323
101_130_BN011.wiff	SIK3	AAAAASGAGGVAVAGAGGAGPAGR	A[+42]AAAASGAGGVAVAGAGGAGPAGR	22.98	13744	11			0.0113894
101_130_BN012.wiff	SIK3	AAAAASGAGGVAVAGAGGAGPAGR	A[+42]AAAASGAGGVAVAGAGGAGPAGR	22.9	14020	12			0.0116181
101_130_BN013.wiff	SIK3	AAAAASGAGGVAVAGAGGAGPAGR	A[+42]AAAASGAGGVAVAGAGGAGPAGR	22.93	26557	13			0.0220072
101_130_BN014.wiff	SIK3	AAAAASGAGGVAVAGAGGAGPAGR	A[+42]AAAASGAGGVAVAGAGGAGPAGR	22.86	43095	14			0.0357119
101_130_BN015.wiff	SIK3	AAAAASGAGGVAVAGAGGAGPAGR	A[+42]AAAASGAGGVAVAGAGGAGPAGR	22.93	57464	15			0.0476192
101_130_BN016.wiff	SIK3	AAAAASGAGGVAVAGAGGAGPAGR	A[+42]AAAASGAGGVAVAGAGGAGPAGR	23.02	73416	16			0.0608382
101_130_BN017.wiff	SIK3	AAAAASGAGGVAVAGAGGAGPAGR	A[+42]AAAASGAGGVAVAGAGGAGPAGR	23.11	118119	17			0.0978826
101_130_BN018.wiff	SIK3	AAAAASGAGGVAVAGAGGAGPAGR	A[+42]AAAASGAGGVAVAGAGGAGPAGR	23.12	141287	18			0.117081
101_130_BN019.wiff	SIK3	AAAAASGAGGVAVAGAGGAGPAGR	A[+42]AAAASGAGGVAVAGAGGAGPAGR	23.16	99488	19			0.0824435
101_130_BN020.wiff	SIK3	AAAAASGAGGVAVAGAGGAGPAGR	A[+42]AAAASGAGGVAVAGAGGAGPAGR	23.06	113952	20			0.0944295
101_130_BN021.wiff	SIK3	AAAAASGAGGVAVAGAGGAGPAGR	A[+42]AAAASGAGGVAVAGAGGAGPAGR	23.11	107607	21			0.0891716
101_130_BN022.wiff	SIK3	AAAAASGAGGVAVAGAGGAGPAGR	A[+42]AAAASGAGGVAVAGAGGAGPAGR	23.08	63521	22			0.0526385
101_130_BN023.wiff	SIK3	AAAAASGAGGVAVAGAGGAGPAGR	A[+42]AAAASGAGGVAVAGAGGAGPAGR	23.08	52816	23			0.0437675
101_130_BN024.wiff	SIK3	AAAAASGAGGVAVAGAGGAGPAGR	A[+42]AAAASGAGGVAVAGAGGAGPAGR	23.08	57329	24			0.0475073
101_130_BN025.wiff	SIK3	AAAAASGAGGVAVAGAGGAGPAGR	A[+42]AAAASGAGGVAVAGAGGAGPAGR	23.05	55760	25			0.0462071
101_130_BN026.wiff	SIK3	AAAAASGAGGVAVAGAGGAGPAGR	A[+42]AAAASGAGGVAVAGAGGAGPAGR	23.15	51648	26			0.0427996
101_130_BN027.wiff	SIK3	AAAAASGAGGVAVAGAGGAGPAGR	A[+42]AAAASGAGGVAVAGAGGAGPAGR	23.1	32546	27			0.0269702
101_130_BN028.wiff	SIK3	AAAAASGAGGVAVAGAGGAGPAGR	A[+42]AAAASGAGGVAVAGAGGAGPAGR	23.09	35024	28			0.0290236
101_130_BN029.wiff	SIK3	AAAAASGAGGVAVAGAGGAGPAGR	A[+42]AAAASGAGGVAVAGAGGAGPAGR	22.99	14074	29			0.0116628
101_130_BN030.wiff	SIK3	AAAAASGAGGVAVAGAGGAGPAGR	A[+42]AAAASGAGGVAVAGAGGAGPAGR	22.89	16585	30			0.0137436
101_130_BN001.wiff	SIK3	ASLMAPFSYGHRPLSK	ASLM[+16]APFSYGHRPLSK	22.6	706	1		205670	0.00343268
101_130_BN002.wiff	SIK3	ASLMAPFSYGHRPLSK	ASLM[+16]APFSYGHRPLSK	22.88	250	2			0.00121554
101_130_BN003.wiff	SIK3	ASLMAPFSYGHRPLSK	ASLM[+16]APFSYGHRPLSK	22.94	825	3			0.00401128
101_130_BN004.wiff	SIK3	ASLMAPFSYGHRPLSK	ASLM[+16]APFSYGHRPLSK	22.89	1687	4			0.00820246
101_130_BN005.wiff	SIK3	ASLMAPFSYGHRPLSK	ASLM[+16]APFSYGHRPLSK	22.86	251	5			0.0012204
101_130_BN006.wiff	SIK3	ASLMAPFSYGHRPLSK	ASLM[+16]APFSYGHRPLSK	22.93	1474	6			0.00716682
101_130_BN007.wiff	SIK3	ASLMAPFSYGHRPLSK	ASLM[+16]APFSYGHRPLSK	22.85	1613	7			0.00784266
101_130_BN008.wiff	SIK3	ASLMAPFSYGHRPLSK	ASLM[+16]APFSYGHRPLSK	22.7	2375	8			0.0115476
101_130_BN009.wiff	SIK3	ASLMAPFSYGHRPLSK	ASLM[+16]APFSYGHRPLSK	22.64	1226	9			0.00596101
101_130_BN010.wiff	SIK3	ASLMAPFSYGHRPLSK	ASLM[+16]APFSYGHRPLSK	22.55	1161	10			0.00564497
101_130_BN011.wiff	SIK3	ASLMAPFSYGHRPLSK	ASLM[+16]APFSYGHRPLSK	22.55	1802	11			0.00876161
101_130_BN012.wiff	SIK3	ASLMAPFSYGHRPLSK	ASLM[+16]APFSYGHRPLSK	22.56	3336	12			0.0162202
101_130_BN013.wiff	SIK3	ASLMAPFSYGHRPLSK	ASLM[+16]APFSYGHRPLSK	22.56	4442	13			0.0215977
101_130_BN014.wiff	SIK3	ASLMAPFSYGHRPLSK	ASLM[+16]APFSYGHRPLSK	22.49	6710	14			0.0326251
101_130_BN015.wiff	SIK3	ASLMAPFSYGHRPLSK	ASLM[+16]APFSYGHRPLSK	22.62	8773	15			0.0426557
101_130_BN016.wiff	SIK3	ASLMAPFSYGHRPLSK	ASLM[+16]APFSYGHRPLSK	22.65	16380	16			0.0796421
101_130_BN017.wiff	SIK3	ASLMAPFSYGHRPLSK	ASLM[+16]APFSYGHRPLSK	22.79	31441	17			0.152871
101_130_BN018.wiff	SIK3	ASLMAPFSYGHRPLSK	ASLM[+16]APFSYGHRPLSK	22.78	25934	18			0.126095
101_130_BN019.wiff	SIK3	ASLMAPFSYGHRPLSK	ASLM[+16]APFSYGHRPLSK	22.91	19591	19			0.0952545
101_130_BN020.wiff	SIK3	ASLMAPFSYGHRPLSK	ASLM[+16]APFSYGHRPLSK	22.75	25241	20			0.122726
101_130_BN021.wiff	SIK3	ASLMAPFSYGHRPLSK	ASLM[+16]APFSYGHRPLSK	22.68	15576	21			0.075733
101_130_BN022.wiff	SIK3	ASLMAPFSYGHRPLSK	ASLM[+16]APFSYGHRPLSK	22.8	13213	22			0.0642437
101_130_BN023.wiff	SIK3	ASLMAPFSYGHRPLSK	ASLM[+16]APFSYGHRPLSK	22.78	7190	23			0.0349589
101_130_BN024.wiff	SIK3	ASLMAPFSYGHRPLSK	ASLM[+16]APFSYGHRPLSK	23.02	2374	24			0.0115428
101_130_BN025.wiff	SIK3	ASLMAPFSYGHRPLSK	ASLM[+16]APFSYGHRPLSK	23.05	972	25			0.00472602
101_130_BN026.wiff	SIK3	ASLMAPFSYGHRPLSK	ASLM[+16]APFSYGHRPLSK	23.18	820	26			0.00398697
101_130_BN027.wiff	SIK3	ASLMAPFSYGHRPLSK	ASLM[+16]APFSYGHRPLSK	23.07	401	27			0.00194973
101_130_BN028.wiff	SIK3	ASLMAPFSYGHRPLSK	ASLM[+16]APFSYGHRPLSK	22.9	4404	28			0.0214129
101_130_BN029.wiff	SIK3	ASLMAPFSYGHRPLSK	ASLM[+16]APFSYGHRPLSK	22.75	1969	29			0.00957359
101_130_BN030.wiff	SIK3	ASLMAPFSYGHRPLSK	ASLM[+16]APFSYGHRPLSK	22.4	3533	30			0.017178
101_130_BN001.wiff	Slc9a1	IGSDPLAYEPK	IGSDPLAYEPK	23.46	4577	1		27891894	0.000164098
101_130_BN002.wiff	Slc9a1	IGSDPLAYEPK	IGSDPLAYEPK	23.68	8169	2			0.000292881
101_130_BN003.wiff	Slc9a1	IGSDPLAYEPK	IGSDPLAYEPK	23.7	7402	3			0.000265382
101_130_BN004.wiff	Slc9a1	IGSDPLAYEPK	IGSDPLAYEPK	23.57	9198	4			0.000329773
101_130_BN005.wiff	Slc9a1	IGSDPLAYEPK	IGSDPLAYEPK	23.54	1938	5			6.94826e-05
101_130_BN006.wiff	Slc9a1	IGSDPLAYEPK	IGSDPLAYEPK	23.51	5195	6			0.000186255
101_130_BN007.wiff	Slc9a1	IGSDPLAYEPK	IGSDPLAYEPK	23.46	10833	7			0.000388392
101_130_BN008.wiff	Slc9a1	IGSDPLAYEPK	IGSDPLAYEPK	23.83	7897	8			0.000283129
101_130_BN009.wiff	Slc9a1	IGSDPLAYEPK	IGSDPLAYEPK	23.86	5660	9			0.000202926
101_130_BN010.wiff	Slc9a1	IGSDPLAYEPK	IGSDPLAYEPK	23.86	7453	10			0.00026721
101_130_BN011.wiff	Slc9a1	IGSDPLAYEPK	IGSDPLAYEPK	23.88	14794	11			0.000530405
101_130_BN012.wiff	Slc9a1	IGSDPLAYEPK	IGSDPLAYEPK	23.88	9157	12			0.000328303
101_130_BN013.wiff	Slc9a1	IGSDPLAYEPK	IGSDPLAYEPK	23.87	16408	13			0.000588271
101_130_BN014.wiff	Slc9a1	IGSDPLAYEPK	IGSDPLAYEPK	23.84	38072	14			0.00136498
101_130_BN015.wiff	Slc9a1	IGSDPLAYEPK	IGSDPLAYEPK	23.9	33161	15			0.00118891
101_130_BN016.wiff	Slc9a1	IGSDPLAYEPK	IGSDPLAYEPK	23.93	46775	16			0.00167701
101_130_BN017.wiff	Slc9a1	IGSDPLAYEPK	IGSDPLAYEPK	24.12	107218	17			0.00384406
101_130_BN018.wiff	Slc9a1	IGSDPLAYEPK	IGSDPLAYEPK	24.09	550225	18			0.0197271
101_130_BN019.wiff	Slc9a1	IGSDPLAYEPK	IGSDPLAYEPK	24.14	2197056	19			0.0787704
101_130_BN020.wiff	Slc9a1	IGSDPLAYEPK	IGSDPLAYEPK	23.99	4723455	20			0.169349
101_130_BN021.wiff	Slc9a1	IGSDPLAYEPK	IGSDPLAYEPK	23.94	7569077	21			0.271372
101_130_BN022.wiff	Slc9a1	IGSDPLAYEPK	IGSDPLAYEPK	24.02	4848733	22			0.17384
101_130_BN023.wiff	Slc9a1	IGSDPLAYEPK	IGSDPLAYEPK	24.04	2935344	23			0.10524
101_130_BN024.wiff	Slc9a1	IGSDPLAYEPK	IGSDPLAYEPK	24.09	2082090	24			0.0746486
101_130_BN025.wiff	Slc9a1	IGSDPLAYEPK	IGSDPLAYEPK	24.16	1127758	25			0.0404332
101_130_BN026.wiff	Slc9a1	IGSDPLAYEPK	IGSDPLAYEPK	24.65	977036	26			0.0350294
101_130_BN027.wiff	Slc9a1	IGSDPLAYEPK	IGSDPLAYEPK	24.31	245366	27			0.00879704
101_130_BN028.wiff	Slc9a1	IGSDPLAYEPK	IGSDPLAYEPK	24.15	165362	28			0.00592868
101_130_BN029.wiff	Slc9a1	IGSDPLAYEPK	IGSDPLAYEPK	24.01	45290	29			0.00162377
101_130_BN030.wiff	Slc9a1	IGSDPLAYEPK	IGSDPLAYEPK	23.82	91195	30			0.00326959
101_130_BN001.wiff	Slc9a1	VTPEEEEEDEDGIIMIR	VTPEEEEEDEDGIIM[+16]IR	26.82	1251	1		10547508	0.000118606
101_130_BN002.wiff	Slc9a1	VTPEEEEEDEDGIIMIR	VTPEEEEEDEDGIIM[+16]IR	29.4	1713	2			0.000162408
101_130_BN003.wiff	Slc9a1	VTPEEEEEDEDGIIMIR	VTPEEEEEDEDGIIM[+16]IR	27.73	437	3			4.14316e-05
101_130_BN004.wiff	Slc9a1	VTPEEEEEDEDGIIMIR	VTPEEEEEDEDGIIM[+16]IR	28.22	2546	4			0.000241384
101_130_BN005.wiff	Slc9a1	VTPEEEEEDEDGIIMIR	VTPEEEEEDEDGIIM[+16]IR	28.26	7254	5			0.000687745
101_130_BN006.wiff	Slc9a1	VTPEEEEEDEDGIIMIR	VTPEEEEEDEDGIIM[+16]IR	28.19	21914	6			0.00207765
101_130_BN007.wiff	Slc9a1	VTPEEEEEDEDGIIMIR	VTPEEEEEDEDGIIM[+16]IR	28.08	20819	7			0.00197383
101_130_BN008.wiff	Slc9a1	VTPEEEEEDEDGIIMIR	VTPEEEEEDEDGIIM[+16]IR	27.58	10281	8			0.000974733
101_130_BN009.wiff	Slc9a1	VTPEEEEEDEDGIIMIR	VTPEEEEEDEDGIIM[+16]IR	28.1	16381	9			0.00155307
101_130_BN010.wiff	Slc9a1	VTPEEEEEDEDGIIMIR	VTPEEEEEDEDGIIM[+16]IR	27.62	6011	10			0.000569898
101_130_BN011.wiff	Slc9a1	VTPEEEEEDEDGIIMIR	VTPEEEEEDEDGIIM[+16]IR	27.56	10667	11			0.00101133
101_130_BN012.wiff	Slc9a1	VTPEEEEEDEDGIIMIR	VTPEEEEEDEDGIIM[+16]IR	27.66	5868	12			0.00055634
101_130_BN013.wiff	Slc9a1	VTPEEEEEDEDGIIMIR	VTPEEEEEDEDGIIM[+16]IR	27.58	10652	13			0.00100991
101_130_BN014.wiff	Slc9a1	VTPEEEEEDEDGIIMIR	VTPEEEEEDEDGIIM[+16]IR	27.52	16716	14			0.00158483
101_130_BN015.wiff	Slc9a1	VTPEEEEEDEDGIIMIR	VTPEEEEEDEDGIIM[+16]IR	27.65	23887	15			0.00226471
101_130_BN016.wiff	Slc9a1	VTPEEEEEDEDGIIMIR	VTPEEEEEDEDGIIM[+16]IR	27.62	31101	16			0.00294866
101_130_BN017.wiff	Slc9a1	VTPEEEEEDEDGIIMIR	VTPEEEEEDEDGIIM[+16]IR	27.81	59197	17			0.00561242
101_130_BN018.wiff	Slc9a1	VTPEEEEEDEDGIIMIR	VTPEEEEEDEDGIIM[+16]IR	27.82	279411	18			0.0264907
101_130_BN019.wiff	Slc9a1	VTPEEEEEDEDGIIMIR	VTPEEEEEDEDGIIM[+16]IR	27.86	857231	19			0.0812733
101_130_BN020.wiff	Slc9a1	VTPEEEEEDEDGIIMIR	VTPEEEEEDEDGIIM[+16]IR	27.71	1708803	20			0.16201
101_130_BN021.wiff	Slc9a1	VTPEEEEEDEDGIIMIR	VTPEEEEEDEDGIIM[+16]IR	27.66	2548628	21			0.241633
101_130_BN022.wiff	Slc9a1	VTPEEEEEDEDGIIMIR	VTPEEEEEDEDGIIM[+16]IR	27.7	1907373	22			0.180836
101_130_BN023.wiff	Slc9a1	VTPEEEEEDEDGIIMIR	VTPEEEEEDEDGIIM[+16]IR	27.73	1021067	23			0.0968065
101_130_BN024.wiff	Slc9a1	VTPEEEEEDEDGIIMIR	VTPEEEEEDEDGIIM[+16]IR	27.83	823704	24			0.0780947
101_130_BN025.wiff	Slc9a1	VTPEEEEEDEDGIIMIR	VTPEEEEEDEDGIIM[+16]IR	27.87	542435	25			0.0514278
101_130_BN026.wiff	Slc9a1	VTPEEEEEDEDGIIMIR	VTPEEEEEDEDGIIM[+16]IR	28.86	345050	26			0.0327139
101_130_BN027.wiff	Slc9a1	VTPEEEEEDEDGIIMIR	VTPEEEEEDEDGIIM[+16]IR	28.5	125512	27			0.0118997
101_130_BN028.wiff	Slc9a1	VTPEEEEEDEDGIIMIR	VTPEEEEEDEDGIIM[+16]IR	27.84	62075	28			0.00588528
101_130_BN029.wiff	Slc9a1	VTPEEEEEDEDGIIMIR	VTPEEEEEDEDGIIM[+16]IR	27.71	34224	29			0.00324475
101_130_BN030.wiff	Slc9a1	VTPEEEEEDEDGIIMIR	VTPEEEEEDEDGIIM[+16]IR	27.47	45300	30			0.00429485
101_130_BN001.wiff	Synapsin-1	IWQGIDIETK	IWQGIDIETK	28.89	667	1		4371682	0.000152573
101_130_BN002.wiff	Synapsin-1	IWQGIDIETK	IWQGIDIETK	29.01	3100	2			0.000709109
101_130_BN003.wiff	Synapsin-1	IWQGIDIETK	IWQGIDIETK	29.02	5511	3			0.00126061
101_130_BN004.wiff	Synapsin-1	IWQGIDIETK	IWQGIDIETK	28.75	3900	4			0.000892105
101_130_BN005.wiff	Synapsin-1	IWQGIDIETK	IWQGIDIETK	28.86	7563	5			0.00173
101_130_BN006.wiff	Synapsin-1	IWQGIDIETK	IWQGIDIETK	28.74	3939	6			0.000901026
101_130_BN007.wiff	Synapsin-1	IWQGIDIETK	IWQGIDIETK	28.65	12289	7			0.00281105
101_130_BN008.wiff	Synapsin-1	IWQGIDIETK	IWQGIDIETK	28.61	15543	8			0.00355538
101_130_BN009.wiff	Synapsin-1	IWQGIDIETK	IWQGIDIETK	28.56	7075	9			0.00161837
101_130_BN010.wiff	Synapsin-1	IWQGIDIETK	IWQGIDIETK	28.64	6031	10			0.00137956
101_130_BN011.wiff	Synapsin-1	IWQGIDIETK	IWQGIDIETK	28.63	4535	11			0.00103736
101_130_BN012.wiff	Synapsin-1	IWQGIDIETK	IWQGIDIETK	29.02	5963	12			0.00136401
101_130_BN013.wiff	Synapsin-1	IWQGIDIETK	IWQGIDIETK	28.6	5930	13			0.00135646
101_130_BN014.wiff	Synapsin-1	IWQGIDIETK	IWQGIDIETK	28.54	6505	14			0.00148799
101_130_BN015.wiff	Synapsin-1	IWQGIDIETK	IWQGIDIETK	28.67	6729	15			0.00153922
101_130_BN016.wiff	Synapsin-1	IWQGIDIETK	IWQGIDIETK	28.62	8617	16			0.00197109
101_130_BN017.wiff	Synapsin-1	IWQGIDIETK	IWQGIDIETK	28.84	16414	17			0.00375462
101_130_BN018.wiff	Synapsin-1	IWQGIDIETK	IWQGIDIETK	28.87	94570	18			0.0216324
101_130_BN019.wiff	Synapsin-1	IWQGIDIETK	IWQGIDIETK	28.93	315043	19			0.0720645
101_130_BN020.wiff	Synapsin-1	IWQGIDIETK	IWQGIDIETK	28.78	730422	20			0.16708
101_130_BN021.wiff	Synapsin-1	IWQGIDIETK	IWQGIDIETK	28.67	1272921	21			0.291174
101_130_BN022.wiff	Synapsin-1	IWQGIDIETK	IWQGIDIETK	28.76	682043	22			0.156014
101_130_BN023.wiff	Synapsin-1	IWQGIDIETK	IWQGIDIETK	28.8	445054	23			0.101804
101_130_BN024.wiff	Synapsin-1	IWQGIDIETK	IWQGIDIETK	28.89	338302	24			0.0773849
101_130_BN025.wiff	Synapsin-1	IWQGIDIETK	IWQGIDIETK	28.95	190027	25			0.0434677
101_130_BN026.wiff	Synapsin-1	IWQGIDIETK	IWQGIDIETK	30.87	112753	26			0.0257917
101_130_BN027.wiff	Synapsin-1	IWQGIDIETK	IWQGIDIETK	30.03	19307	27			0.00441638
101_130_BN028.wiff	Synapsin-1	IWQGIDIETK	IWQGIDIETK	28.94	24585	28			0.00562369
101_130_BN029.wiff	Synapsin-1	IWQGIDIETK	IWQGIDIETK	28.77	10542	29			0.00241143
101_130_BN030.wiff	Synapsin-1	IWQGIDIETK	IWQGIDIETK	28.13	15802	30			0.00361463
101_130_BN001.wiff	Synapsin-1	TYATAEPFIDAK	TYATAEPFIDAK	26.39	644	1		175645	0.00366649
101_130_BN002.wiff	Synapsin-1	TYATAEPFIDAK	TYATAEPFIDAK	26.35	698	2			0.00397392
101_130_BN003.wiff	Synapsin-1	TYATAEPFIDAK	TYATAEPFIDAK	26.07	854	3			0.00486208
101_130_BN004.wiff	Synapsin-1	TYATAEPFIDAK	TYATAEPFIDAK	25.88	896	4			0.0051012
101_130_BN005.wiff	Synapsin-1	TYATAEPFIDAK	TYATAEPFIDAK	25.94	805	5			0.00458311
101_130_BN006.wiff	Synapsin-1	TYATAEPFIDAK	TYATAEPFIDAK	25.96	986	6			0.0056136
101_130_BN007.wiff	Synapsin-1	TYATAEPFIDAK	TYATAEPFIDAK	26.19	4379	7			0.024931
101_130_BN008.wiff	Synapsin-1	TYATAEPFIDAK	TYATAEPFIDAK	25.82	6740	8			0.0383729
101_130_BN009.wiff	Synapsin-1	TYATAEPFIDAK	TYATAEPFIDAK	25.76	5755	9			0.032765
101_130_BN010.wiff	Synapsin-1	TYATAEPFIDAK	TYATAEPFIDAK	25.79	11874	10			0.0676023
101_130_BN011.wiff	Synapsin-1	TYATAEPFIDAK	TYATAEPFIDAK	25.8	22074	11			0.125674
101_130_BN012.wiff	Synapsin-1	TYATAEPFIDAK	TYATAEPFIDAK	25.81	13227	12			0.0753053
101_130_BN013.wiff	Synapsin-1	TYATAEPFIDAK	TYATAEPFIDAK	25.83	13685	13			0.0779128
101_130_BN014.wiff	Synapsin-1	TYATAEPFIDAK	TYATAEPFIDAK	25.75	7959	14			0.045313
101_130_BN015.wiff	Synapsin-1	TYATAEPFIDAK	TYATAEPFIDAK	25.82	5205	15			0.0296336
101_130_BN016.wiff	Synapsin-1	TYATAEPFIDAK	TYATAEPFIDAK	25.83	4034	16			0.0229668
101_130_BN017.wiff	Synapsin-1	TYATAEPFIDAK	TYATAEPFIDAK	26.07	4328	17			0.0246406
101_130_BN018.wiff	Synapsin-1	TYATAEPFIDAK	TYATAEPFIDAK	26.06	2697	18			0.0153548
101_130_BN019.wiff	Synapsin-1	TYATAEPFIDAK	TYATAEPFIDAK	26.31	4450	19			0.0253352
101_130_BN020.wiff	Synapsin-1	TYATAEPFIDAK	TYATAEPFIDAK	25.99	3617	20			0.0205927
101_130_BN021.wiff	Synapsin-1	TYATAEPFIDAK	TYATAEPFIDAK	26.3	3904	21			0.0222267
101_130_BN022.wiff	Synapsin-1	TYATAEPFIDAK	TYATAEPFIDAK	26.01	2783	22			0.0158445
101_130_BN023.wiff	Synapsin-1	TYATAEPFIDAK	TYATAEPFIDAK	25.93	1848	23			0.0105212
101_130_BN024.wiff	Synapsin-1	TYATAEPFIDAK	TYATAEPFIDAK	26.26	3528	24			0.020086
101_130_BN025.wiff	Synapsin-1	TYATAEPFIDAK	TYATAEPFIDAK	26.11	3547	25			0.0201941
101_130_BN026.wiff	Synapsin-1	TYATAEPFIDAK	TYATAEPFIDAK	26.32	1189	26			0.00676934
101_130_BN027.wiff	Synapsin-1	TYATAEPFIDAK	TYATAEPFIDAK	26.87	6568	27			0.0373936
101_130_BN028.wiff	Synapsin-1	TYATAEPFIDAK	TYATAEPFIDAK	26.22	13470	28			0.0766888
101_130_BN029.wiff	Synapsin-1	TYATAEPFIDAK	TYATAEPFIDAK	26.09	11058	29			0.0629565
101_130_BN030.wiff	Synapsin-1	TYATAEPFIDAK	TYATAEPFIDAK	25.83	12843	30			0.0731191
101_130_BN001.wiff	Synapsin-1	VLLVIDEPHTDWAK	VLLVIDEPHTDWAK	31.65	400	1		1226274	0.000326191
101_130_BN002.wiff	Synapsin-1	VLLVIDEPHTDWAK	VLLVIDEPHTDWAK	31.61	743	2			0.0006059
101_130_BN003.wiff	Synapsin-1	VLLVIDEPHTDWAK	VLLVIDEPHTDWAK	31.24	1282	3			0.00104544
101_130_BN004.wiff	Synapsin-1	VLLVIDEPHTDWAK	VLLVIDEPHTDWAK	30.62	2800	4			0.00228334
101_130_BN005.wiff	Synapsin-1	VLLVIDEPHTDWAK	VLLVIDEPHTDWAK	31.18	2727	5			0.00222381
101_130_BN006.wiff	Synapsin-1	VLLVIDEPHTDWAK	VLLVIDEPHTDWAK	30.34	3541	6			0.00288761
101_130_BN007.wiff	Synapsin-1	VLLVIDEPHTDWAK	VLLVIDEPHTDWAK	30.47	2904	7			0.00236815
101_130_BN008.wiff	Synapsin-1	VLLVIDEPHTDWAK	VLLVIDEPHTDWAK	30.5	7526	8			0.00613729
101_130_BN009.wiff	Synapsin-1	VLLVIDEPHTDWAK	VLLVIDEPHTDWAK	30.72	31981	9			0.0260798
101_130_BN010.wiff	Synapsin-1	VLLVIDEPHTDWAK	VLLVIDEPHTDWAK	30.5	13469	10			0.0109837
101_130_BN011.wiff	Synapsin-1	VLLVIDEPHTDWAK	VLLVIDEPHTDWAK	30.45	24074	11			0.0196318
101_130_BN012.wiff	Synapsin-1	VLLVIDEPHTDWAK	VLLVIDEPHTDWAK	30.45	14564	12			0.0118766
101_130_BN013.wiff	Synapsin-1	VLLVIDEPHTDWAK	VLLVIDEPHTDWAK	30.45	16235	13			0.0132393
101_130_BN014.wiff	Synapsin-1	VLLVIDEPHTDWAK	VLLVIDEPHTDWAK	30.38	7167	14			0.00584453
101_130_BN015.wiff	Synapsin-1	VLLVIDEPHTDWAK	VLLVIDEPHTDWAK	30.58	4514	15			0.00368107
101_130_BN016.wiff	Synapsin-1	VLLVIDEPHTDWAK	VLLVIDEPHTDWAK	30.51	2589	16			0.00211127
101_130_BN017.wiff	Synapsin-1	VLLVIDEPHTDWAK	VLLVIDEPHTDWAK	30.72	3793	17			0.00309311
101_130_BN018.wiff	Synapsin-1	VLLVIDEPHTDWAK	VLLVIDEPHTDWAK	30.71	1638	18			0.00133575
101_130_BN019.wiff	Synapsin-1	VLLVIDEPHTDWAK	VLLVIDEPHTDWAK	30.84	1285	19			0.00104789
101_130_BN020.wiff	Synapsin-1	VLLVIDEPHTDWAK	VLLVIDEPHTDWAK	30.64	3101	20			0.0025288
101_130_BN021.wiff	Synapsin-1	VLLVIDEPHTDWAK	VLLVIDEPHTDWAK	30.4	2389	21			0.00194818
101_130_BN022.wiff	Synapsin-1	VLLVIDEPHTDWAK	VLLVIDEPHTDWAK	30.74	1736	22			0.00141567
101_130_BN023.wiff	Synapsin-1	VLLVIDEPHTDWAK	VLLVIDEPHTDWAK	31.03	4137	23			0.00337363
101_130_BN024.wiff	Synapsin-1	VLLVIDEPHTDWAK	VLLVIDEPHTDWAK	31.63	6865	24			0.00559826
101_130_BN025.wiff	Synapsin-1	VLLVIDEPHTDWAK	VLLVIDEPHTDWAK	30.36	611	25			0.000498257
101_130_BN026.wiff	Synapsin-1	VLLVIDEPHTDWAK	VLLVIDEPHTDWAK	32.14	4280	26			0.00349025
101_130_BN027.wiff	Synapsin-1	VLLVIDEPHTDWAK	VLLVIDEPHTDWAK	32.46	2388	27			0.00194736
101_130_BN028.wiff	Synapsin-1	VLLVIDEPHTDWAK	VLLVIDEPHTDWAK	30.85	3101	28			0.0025288
101_130_BN029.wiff	Synapsin-1	VLLVIDEPHTDWAK	VLLVIDEPHTDWAK	31.01	7616	29			0.00621068
101_130_BN030.wiff	Synapsin-1	VLLVIDEPHTDWAK	VLLVIDEPHTDWAK	30.44	1046818	30			0.853658
101_130_BN001.wiff	Tescalcin	ITLEEYR	ITLEEYR	21.77	759	1		4627000	0.000164037
101_130_BN002.wiff	Tescalcin	ITLEEYR	ITLEEYR	22.05	1509	2			0.000326129
101_130_BN003.wiff	Tescalcin	ITLEEYR	ITLEEYR	21.71	2191	3			0.000473525
101_130_BN004.wiff	Tescalcin	ITLEEYR	ITLEEYR	21.59	3190	4			0.000689432
101_130_BN005.wiff	Tescalcin	ITLEEYR	ITLEEYR	21.6	2846	5			0.000615085
101_130_BN006.wiff	Tescalcin	ITLEEYR	ITLEEYR	21.5	4545	6			0.000982278
101_130_BN007.wiff	Tescalcin	ITLEEYR	ITLEEYR	21.44	11950	7			0.00258267
101_130_BN008.wiff	Tescalcin	ITLEEYR	ITLEEYR	21.38	14811	8			0.00320099
101_130_BN009.wiff	Tescalcin	ITLEEYR	ITLEEYR	21.35	5263	9			0.00113745
101_130_BN010.wiff	Tescalcin	ITLEEYR	ITLEEYR	21.36	7229	10			0.00156235
101_130_BN011.wiff	Tescalcin	ITLEEYR	ITLEEYR	21.45	4737	11			0.00102377
101_130_BN012.wiff	Tescalcin	ITLEEYR	ITLEEYR	21.47	2252	12			0.000486708
101_130_BN013.wiff	Tescalcin	ITLEEYR	ITLEEYR	21.37	5686	13			0.00122887
101_130_BN014.wiff	Tescalcin	ITLEEYR	ITLEEYR	21.32	10369	14			0.00224098
101_130_BN015.wiff	Tescalcin	ITLEEYR	ITLEEYR	21.41	8351	15			0.00180484
101_130_BN016.wiff	Tescalcin	ITLEEYR	ITLEEYR	21.52	11035	16			0.00238491
101_130_BN017.wiff	Tescalcin	ITLEEYR	ITLEEYR	21.66	22310	17			0.0048217
101_130_BN018.wiff	Tescalcin	ITLEEYR	ITLEEYR	21.62	99092	18			0.021416
101_130_BN019.wiff	Tescalcin	ITLEEYR	ITLEEYR	21.69	399164	19			0.0862684
101_130_BN020.wiff	Tescalcin	ITLEEYR	ITLEEYR	21.57	758092	20			0.163841
101_130_BN021.wiff	Tescalcin	ITLEEYR	ITLEEYR	21.52	1440796	21			0.311389
101_130_BN022.wiff	Tescalcin	ITLEEYR	ITLEEYR	21.61	744485	22			0.1609
101_130_BN023.wiff	Tescalcin	ITLEEYR	ITLEEYR	21.58	496037	23			0.107205
101_130_BN024.wiff	Tescalcin	ITLEEYR	ITLEEYR	21.63	331301	24			0.0716017
101_130_BN025.wiff	Tescalcin	ITLEEYR	ITLEEYR	21.7	140071	25			0.0302725
101_130_BN026.wiff	Tescalcin	ITLEEYR	ITLEEYR	21.95	23519	26			0.00508299
101_130_BN027.wiff	Tescalcin	ITLEEYR	ITLEEYR	21.87	17077	27			0.00369073
101_130_BN028.wiff	Tescalcin	ITLEEYR	ITLEEYR	21.67	22014	28			0.00475773
101_130_BN029.wiff	Tescalcin	ITLEEYR	ITLEEYR	21.59	9181	29			0.00198422
101_130_BN030.wiff	Tescalcin	ITLEEYR	ITLEEYR	21.44	27138	30			0.00586514

## Sheet: Peak picked_normalized
	PPP3CA	PPP3r1	PPP3Cb	Calmodulin	CaMK2a	CaMK2b	Homer3	Shank1	Shank2	Grid2	mGluR1	Synapsin1
1	0.000817061	0.00754641	0.000294537	0.00114298	0.0309294	0.00253279	0.000461559	0.000891794	0.0104957	0.00182291	0.00231755	0.000152573
2	0.00102867	0.0117719	0.000496488	0.00415836	0.0274426	0.00292846	0.00121455	0.00254563	0.00588897	0.0275766	0.00919702	0.000709109
3	0.00168343	0.0144368	0.00130219	0.0103884	0.0170944	0.00220516	0.00115097	0.000558144	0.00733963	0.00289092	0.00724896	0.00126061
4	0.00314351	0.016305	0.0033247	0.0113449	0.0980362	0.00126009	0.00137101	0.00157351	0.00650165	0.00587811	0.0120121	0.000892105
5	0.0061857	0.0114729	0.00536549	0.0140613	0.0720419	0.00164568	0.00209835	0.00393996	0.00362139	0.0214817	0.00931957	0.00173
6	0.008449	0.00883278	0.00870487	0.0141284	0.0378469	0.00870977	0.00858555	0.0012687	0.00618794	0.00735911	0.00292483	0.000901026
7	0.0321832	0.0198422	0.02663	0.0453972	0.0039914	0.00867196	0.0167212	0.00340447	0.00738805	0.0134595	0.0061661	0.00281105
8	0.176593	0.0634785	0.116948	0.179097	0.0143132	0.0100228	0.0255798	0.00800555	0.00252444	0.0337598	0.0105853	0.00355538
9	0.187143	0.0433408	0.0871578	0.220923	0.0538611	0.00874757	0.0153508	0.00354246	0.00340874	0.00990722	0.00867936	0.00161837
10	0.144243	0.0541216	0.0570281	0.145327	0.0393099	0.00809988	0.0274355	0.0015179	0.008525	0.0221934	0.00672033	0.00137956
11	0.0466781	0.034109	0.0283325	0.0569018	0.0070582	0.00733122	0.0426441	0.00256211	0.0061332	0.012853	0.0149113	0.00103736
12	0.0159138	0.0185265	0.0181882	0.0199739	0.0233729	0.00731358	0.036252	0.00228818	0.00252655	0.00529777	0.0142931	0.00136401
13	0.0192314	0.0282782	0.025062	0.0196761	0.00250084	0.00766641	0.0415417	0.00273305	0.0153846	0.0140299	0.010664	0.00135646
14	0.017983	0.0261704	0.0285341	0.0174658	0.0380574	0.00555449	0.0365833	0.00224905	0.0132265	0.0125804	0.0105872	0.00148799
15	0.0125105	0.0224669	0.0192114	0.012877	0.0164892	0.00793355	0.0267021	0.00325	0.0183154	0.0119929	0.00990856	0.00153922
16	0.01582	0.022153	0.0206913	0.0155789	0.0461026	0.00807972	0.0314367	0.0036681	0.0225874	0.0115826	0.0106457	0.00197109
17	0.0159565	0.0248847	0.0213748	0.0206499	0.00991978	0.00380296	0.039416	0.00301109	0.0301817	0.0129052	0.00834463	0.00375462
18	0.015902	0.0236981	0.0258434	0.0141394	0.0202257	0.00418099	0.0373609	0.0148269	0.0381214	0.0171638	0.0107866	0.0216324
19	0.0105798	0.0172099	0.022075	0.00882793	0.0691581	0.00740179	0.0243449	0.0134099	0.0295291	0.0145725	0.0262869	0.0720645
20	0.0258873	0.0362255	0.0369591	0.0226184	0.0192292	0.0179538	0.0217147	0.0130247	0.0303018	0.0204614	0.0450028	0.16708
21	0.0555661	0.130854	0.0839239	0.0398465	0.00300228	0.00823093	0.0181196	0.0292789	0.041147	0.0132561	0.0889703	0.291174
22	0.0467596	0.0957419	0.079738	0.0272203	0.00337465	0.00977328	0.0142559	0.0261051	0.0324367	0.0104813	0.0717049	0.156014
23	0.0349871	0.0734475	0.0561532	0.0220747	0.0239473	0.0137199	0.0157767	0.0262554	0.0330936	0.00800963	0.0462906	0.101804
24	0.0303652	0.0663418	0.0528525	0.0164493	0.0816126	0.00933477	0.0271092	0.0244409	0.028929	0.0905974	0.134248	0.0773849
25	0.0207719	0.0504506	0.0512288	0.0279774	0.0813862	0.00550409	0.0323936	0.0317812	0.0420839	0.117207	0.0733164	0.0434677
26	0.0223733	0.025883	0.0396954	0.00079674	0.00368461	0.0167063	0.171238	0.13824	0.182604	0.0129277	0.0614762	0.0257917
27	0.0147325	0.014752	0.0271948	0.000363174	0.0159307	0.01873	0.157773	0.206353	0.148315	0.0132912	0.0532651	0.00441638
28	0.00979552	0.0236069	0.0236487	0.00707321	0.033226	0.297758	0.0710521	0.217835	0.0986786	0.104832	0.144255	0.00562369
29	0.0028521	0.00765724	0.0114507	0.00175098	0.0406799	0.218656	0.0274584	0.100007	0.0565947	0.157411	0.0467277	0.00241143
30	0.00386418	0.00639355	0.0205906	0.00177034	0.0661749	0.269544	0.0268577	0.111433	0.0679284	0.192219	0.0431444	0.00361463
